# Supplementary material
Source: PubMed Central journal article supplement (PMC3973747)
Supplement: NIHMS549890-supplement-1.pdf [file NIHMS549890-supplement-1.pdf]

**Supplementary Table 1 Structural differences in renatured and native deproteinized samples**

| <b>Transcript</b> | <b>Start</b> | <b>Stop</b> | <b>Renatured vs native repeat 1</b> | <b>Renatured vs native repeat 2</b> |
|-------------------|--------------|-------------|-------------------------------------|-------------------------------------|
| NM_006325         | 500          | 519         | -0.392476196                        | -0.918157099                        |
| NM_080593         | 260          | 279         | -0.093726081                        | -0.011486295                        |
| NR_024058         | 660          | 679         | -0.046162093                        | -0.756631807                        |
| NM_002952         | 700          | 719         | -0.020470117                        | -0.237776505                        |
| NM_002635         | 1180         | 1199        | -0.280493699                        | -0.495152236                        |
| NM_001135700      | 1220         | 1239        | -0.772468309                        | -0.458568172                        |
| NM_001024921      | 760          | 779         | -0.555050697                        | -0.0108938                          |
| NR_028500         | 620          | 639         | -0.35412307                         | -0.0735635                          |
| NM_019005         | 1240         | 1259        | -0.402213367                        | -0.092896503                        |
| ENST00000442788.1 | 440          | 459         | -0.455316048                        | -0.153627003                        |
| NR_036430         | 520          | 539         | -0.713394307                        | -0.135393939                        |
| TCONS_00007198    | 60           | 79          | -0.077179738                        | -0.177793097                        |
| NM_004462         | 980          | 999         | -0.318064092                        | -0.304337691                        |
| NM_000967         | 700          | 719         | -0.259485836                        | -0.086597751                        |
| NR_027162         | 1180         | 1199        | -0.390200256                        | -0.434780616                        |
| NM_005274         | 600          | 619         | -0.610495505                        | -0.020435612                        |
| NR_002562         | 0            | 19          | -0.350157585                        | -0.656779981                        |
| NM_001248000      | 220          | 239         | -0.223049374                        | -0.010674454                        |
| NM_021029         | 320          | 339         | -0.191904044                        | -0.127137493                        |
| NM_001204858      | 480          | 499         | -0.298955196                        | -0.41263682                         |
| NM_001024662      | 960          | 979         | -0.315633453                        | -0.029130771                        |
| NM_006098         | 580          | 599         | -0.638912367                        | -0.312719809                        |
| NM_006294         | 420          | 439         | -0.161040949                        | -0.011843492                        |
| NM_003133         | 440          | 459         | -0.438566756                        | -0.649809672                        |
| ENST00000361567.2 | 60           | 79          | -0.041625121                        | -0.100968046                        |
| NM_003002         | 1080         | 1099        | -0.333670539                        | -0.321325564                        |
| NM_001002         | 680          | 699         | -0.14667491                         | -0.041034054                        |
| NM_024315         | 340          | 359         | -0.238954522                        | -0.078396342                        |
| NM_002925         | 200          | 219         | -0.552158535                        | -0.507842182                        |
| ENST00000390306.2 | 120          | 139         | -0.414720223                        | -0.439132845                        |
| NM_001202449      | 1080         | 1099        | -0.26309508                         | -0.488826122                        |
| NM_002727         | 960          | 979         | -0.549615717                        | -0.592394883                        |
| NM_001007073      | 520          | 539         | -0.428499659                        | -0.580293831                        |
| NM_001260507      | 640          | 659         | -0.421648069                        | -0.081605336                        |
| NM_053275         | 1120         | 1139        | -0.403000095                        | -0.112123946                        |
| NM_001253379      | 1140         | 1159        | -0.116061559                        | -0.191513508                        |
| NR_045028         | 980          | 999         | -0.397154273                        | -0.27688873                         |
| NM_016091         | 600          | 619         | -0.196532282                        | -0.620922633                        |
| NM_000416         | 660          | 679         | -0.231086626                        | -0.24591344                         |
| NM_001113202      | 560          | 579         | -0.069699387                        | -0.038845747                        |
| NM_003529         | 180          | 199         | -0.372885739                        | -0.138213528                        |
| NM_033546         | 160          | 179         | -0.085965293                        | -0.12069964                         |
| NR_003071         | 0            | 19          | -0.042462785                        | -0.291245177                        |
| NM_006886         | 160          | 179         | -0.193223066                        | -0.532041958                        |
| NM_001026         | 300          | 319         | -0.039467904                        | -0.284075193                        |
| ENST00000568314.1 | 440          | 459         | -0.231521285                        | -0.090396637                        |
| NR_036693         | 1620         | 1639        | -0.414224981                        | -0.14346841                         |
| NM_005542         | 2540         | 2559        | -0.140077182                        | -0.475956899                        |
| NM_001199802      | 300          | 319         | -0.424307671                        | -0.09530765                         |
| NM_002107         | 400          | 419         | -0.221517822                        | -0.338284247                        |
| NM_012423         | 240          | 259         | -0.115252853                        | -0.340916163                        |
| NM_212552         | 300          | 319         | -0.304518614                        | -0.30205176                         |
| NR_047518         | 900          | 919         | -0.312380169                        | -0.217005517                        |
| NM_000997         | 60           | 79          | -0.638621669                        | -0.130047289                        |
| NM_005731         | 280          | 299         | -0.273233178                        | -0.167866909                        |
| NM_006930         | 1340         | 1359        | -0.610431553                        | -0.264873466                        |

|                   |      |      |              |              |
|-------------------|------|------|--------------|--------------|
| NM_004152         | 880  | 899  | -0.097785499 | -0.340634067 |
| NM_000983         | 180  | 199  | -0.627816874 | -0.704235916 |
| ENST00000390325.2 | 300  | 319  | -0.132975029 | -0.171058185 |
| ENST00000553637.1 | 80   | 99   | -0.651115469 | -0.65976248  |
| ENST00000540866.2 | 4760 | 4779 | -0.512388991 | -0.254828887 |
| NM_014248         | 320  | 339  | -0.371298389 | -0.557731157 |
| NM_003511         | 300  | 319  | -0.313595749 | -0.127037276 |
| NM_006577         | 1300 | 1319 | -0.14766137  | -0.422459476 |
| NM_139207         | 520  | 539  | -0.348344667 | -0.408506667 |
| NM_005176         | 400  | 419  | -0.810062207 | -0.745337284 |
| NM_001243130      | 540  | 559  | -0.329723848 | -0.293803753 |
| ENST00000458386.1 | 20   | 39   | -0.290788213 | -0.160950461 |
| NR_047517         | 1060 | 1079 | -0.629058432 | -0.347446883 |
| ENST00000361899.2 | 600  | 619  | -0.472778239 | -0.262232635 |
| NM_001165416      | 1560 | 1579 | -0.299552369 | -0.094919858 |
| NR_002315         | 380  | 399  | -0.221517822 | -0.338284247 |
| NM_033643         | 120  | 139  | -0.31511027  | -0.338181837 |
| NR_047518         | 1200 | 1219 | -0.288381869 | -0.436375741 |
| NM_033554         | 120  | 139  | -0.559980013 | -0.391827597 |
| NM_001256312      | 1000 | 1019 | -0.490065096 | -0.269221624 |
| NM_004390         | 760  | 779  | -0.235153523 | -0.445384235 |
| NR_037930         | 600  | 619  | -0.553475672 | -0.527549319 |
| NM_005003         | 360  | 379  | -0.346243244 | -0.087760903 |
| NM_176869         | 260  | 279  | -0.605571215 | -0.565096788 |
| NR_002819         | 5580 | 5599 | -0.089372033 | -0.429453257 |
| ENST00000564138.1 | 2020 | 2039 | -0.390871636 | -0.21812095  |
| ENST00000435879.2 | 580  | 599  | -0.189462139 | -0.317765663 |
| NM_080425         | 2720 | 2739 | -0.203805329 | -0.183753661 |
| NM_001416         | 300  | 319  | -0.020950974 | -0.091174116 |
| NM_001003         | 120  | 139  | -0.460994139 | -0.318554832 |
| NM_138493         | 40   | 59   | -0.78896539  | -0.73348821  |
| NM_001023         | 60   | 79   | -0.307379141 | -0.123003289 |
| NM_001028         | 20   | 39   | -0.280538576 | -0.013244157 |
| NM_000984         | 400  | 419  | -0.310389654 | -0.110827251 |
| NR_027165         | 720  | 739  | -0.566136282 | -0.302446836 |
| NM_002948         | 860  | 879  | -0.236861664 | -0.057541232 |
| NM_198901         | 220  | 239  | -0.076605531 | -0.096266298 |
| NM_003518         | 300  | 319  | -0.55364236  | -0.864144245 |
| NM_001123         | 1180 | 1199 | -0.311793172 | -0.234301397 |
| NM_001007074      | 540  | 559  | -0.428499659 | -0.580293831 |
| NM_001113203      | 2660 | 2679 | -0.110830977 | -0.231553121 |
| NM_199246         | 2080 | 2099 | -0.843638589 | -0.64862069  |
| NM_006937         | 160  | 179  | -0.23347471  | -0.605062793 |
| NM_152265         | 380  | 399  | -0.595549767 | -0.478607249 |
| NM_019111         | 1120 | 1139 | -0.155057483 | -0.14958121  |
| NR_027166         | 740  | 759  | -0.557980059 | -0.463967415 |
| NM_001199973      | 320  | 339  | -0.382557735 | -0.358100309 |
| NM_030969         | 420  | 439  | -0.414031973 | -0.341717314 |
| NM_177988         | 340  | 359  | -0.004551164 | -0.079594168 |
| NM_001033930      | 220  | 239  | -0.384499697 | -0.196786411 |
| NM_005517         | 240  | 259  | -0.009728299 | -0.500567619 |
| NM_003352         | 340  | 359  | -0.089710252 | -0.403427863 |
| NM_000994         | 420  | 439  | -0.179607666 | -0.314890189 |
| ENST00000375880.2 | 380  | 399  | -0.404570559 | -0.010616254 |
| NM_001142284      | 300  | 319  | -0.009120161 | -0.238441703 |
| NM_003542         | 200  | 219  | -0.146427533 | -0.157983705 |
| NM_005514         | 1000 | 1019 | -0.578188579 | -0.173870109 |
| NM_001142283      | 300  | 319  | -0.009120161 | -0.268064334 |
| NM_006713         | 540  | 559  | -0.146179795 | -0.534637798 |

|                   |      |      |              |              |
|-------------------|------|------|--------------|--------------|
| NM_139207         | 500  | 519  | -0.104658901 | -0.152013917 |
| NM_004905         | 720  | 739  | -0.104950006 | -0.288310685 |
| NR_045639         | 700  | 719  | -0.388926149 | -0.101599506 |
| NM_006762         | 1540 | 1559 | -0.057775625 | -0.052274396 |
| NM_016565         | 420  | 439  | -0.326764794 | -0.006018203 |
| NM_001024662      | 220  | 239  | -0.256134816 | -0.473721733 |
| NM_001001935      | 340  | 359  | -0.217576203 | -0.465074748 |
| NM_001265604      | 1720 | 1739 | -0.437420046 | -0.085154922 |
| NM_152705         | 300  | 319  | -0.41187631  | -0.541359039 |
| NM_001018069      | 1420 | 1439 | -0.172847115 | -0.265827532 |
| NM_004537         | 500  | 519  | -0.104658901 | -0.152013917 |
| NM_006476         | 580  | 599  | -0.352779461 | -0.299815846 |
| NM_001026         | 440  | 459  | -0.185246374 | -0.089725005 |
| NM_033022         | 300  | 319  | -0.009120161 | -0.238441703 |
| NM_003495         | 220  | 239  | -0.078423158 | -0.055980913 |
| NR_003716         | 520  | 539  | -0.30116506  | -0.241571216 |
| NM_001284         | 1080 | 1099 | -0.568986043 | -0.286190055 |
| NM_001099285      | 980  | 999  | -0.187363378 | -0.07919445  |
| NR_047517         | 1180 | 1199 | -0.251847447 | -0.093354548 |
| NM_001017         | 80   | 99   | -0.422388776 | -0.580681863 |
| NM_001190329      | 1280 | 1299 | -0.479872267 | -0.695746099 |
| NM_000516         | 1040 | 1059 | -0.222617873 | -0.745214297 |
| NM_004060         | 340  | 359  | -0.037922766 | -0.012330263 |
| ENST00000387405.1 | 0    | 19   | -0.274248589 | -0.002621691 |
| NM_001242525      | 140  | 159  | -0.111821405 | -0.053222783 |
| NM_001402         | 800  | 819  | -0.343741814 | -0.078921978 |
| NM_080426         | 1000 | 1019 | -0.255394405 | -0.65330735  |
| NM_002032         | 240  | 259  | -0.445527342 | -0.246968868 |
| NM_001204510      | 300  | 319  | -0.020950974 | -0.091174116 |
| NM_003524         | 20   | 39   | -0.028434435 | -0.042768849 |
| NM_001005339      | 240  | 259  | -0.328270246 | -0.630956873 |
| NM_001402         | 1180 | 1199 | -0.362093032 | -0.20812254  |
| NR_003077         | 0    | 19   | -0.175406651 | -0.556823876 |
| NM_001011         | 300  | 319  | -0.393865998 | -0.441621175 |
| NM_002492         | 880  | 899  | -0.021938107 | -0.317578913 |
| NM_203298         | 480  | 499  | -0.164894714 | -0.795668045 |
| NM_001689         | 340  | 359  | -0.382307502 | -0.097059154 |
| NM_032025         | 1880 | 1899 | -0.142571333 | -0.434205294 |
| NM_001079839      | 660  | 679  | -0.475212247 | -0.330514232 |
| NR_002819         | 1960 | 1979 | -0.451483156 | -0.121670044 |
| ENST00000361381.2 | 820  | 839  | -0.464451341 | -0.147111517 |
| NM_020409         | 480  | 499  | -0.146588292 | -0.382768446 |
| NR_037688         | 1180 | 1199 | -0.096262981 | -0.057879976 |
| NM_000978         | 220  | 239  | -0.218523789 | -0.15743128  |
| NR_045029         | 800  | 819  | -0.117833305 | -0.169373046 |
| ENST00000361739.1 | 340  | 359  | -0.530368235 | -0.415799075 |
| NM_006082         | 1540 | 1559 | -0.479814444 | -0.465687659 |
| NM_080596         | 220  | 239  | -0.476461387 | -0.045871683 |
| NM_005801         | 360  | 379  | -0.139598683 | -0.088742552 |
| NM_001033853      | 880  | 899  | -0.401238579 | -0.038068288 |
| NM_002002         | 600  | 619  | -0.153755385 | -0.59496715  |
| NM_006360         | 1060 | 1079 | -0.546824697 | -0.333683542 |
| NM_001244938      | 520  | 539  | -0.081293686 | -0.047398121 |
| NM_001009         | 160  | 179  | -0.287992995 | -0.134966118 |
| NM_006721         | 900  | 919  | -0.593161947 | -0.769373023 |
| NM_004708         | 360  | 379  | -0.796357445 | -0.087772543 |
| NR_036610         | 1300 | 1319 | -0.549440969 | -0.331650084 |
| NM_006135         | 1500 | 1519 | -0.092210946 | -0.26800012  |
| NM_001123068      | 320  | 339  | -0.32088971  | -0.120320919 |

|                   |      |      |              |              |
|-------------------|------|------|--------------|--------------|
| NM_005731         | 340  | 359  | -0.008114375 | -0.292942147 |
| NM_057180         | 160  | 179  | -0.633310684 | -0.356758234 |
| ENST00000546176.1 | 220  | 239  | -0.204813454 | -0.61351493  |
| NM_003329         | 580  | 599  | -0.081293686 | -0.047398121 |
| NM_021121         | 380  | 399  | -0.646567836 | -0.108972479 |
| NM_001206559      | 460  | 479  | -0.331723922 | -0.653089702 |
| NM_001010935      | 860  | 879  | -0.214499576 | -0.606161594 |
| NM_001190329      | 1180 | 1199 | -0.279834939 | -0.2190234   |
| NM_003512         | 320  | 339  | -0.640982138 | -0.656008228 |
| NM_001267699      | 160  | 179  | -0.095906613 | -0.285439788 |
| NM_000968         | 520  | 539  | -0.082852945 | -0.303120451 |
| NM_021109         | 220  | 239  | -0.270917768 | -0.075111326 |
| NM_002107         | 760  | 779  | -0.243025935 | -0.060961314 |
| NM_033251         | 740  | 759  | -0.142817453 | -0.248883256 |
| NM_002568         | 2260 | 2279 | -0.247625569 | -0.143530634 |
| NM_000973         | 800  | 819  | -0.067131205 | -0.083694036 |
| NM_021058         | 400  | 419  | -0.028071502 | -0.25027398  |
| NM_001130716      | 480  | 499  | -0.232272069 | -0.132761313 |
| NM_212535         | 900  | 919  | -0.11250125  | -0.148073792 |
| NM_021204         | 820  | 839  | -0.21090426  | -0.059273041 |
| NM_004537         | 480  | 499  | -0.102434591 | -0.032271663 |
| NM_001199973      | 260  | 279  | -0.348670765 | -0.332176245 |
| NM_000661         | 20   | 39   | -0.104767028 | -0.031082725 |
| NM_015933         | 220  | 239  | -0.09622251  | -0.05719888  |
| NM_003651         | 1420 | 1439 | -0.131366379 | -0.265608011 |
| NM_198337         | 2260 | 2279 | -0.287988109 | -0.535657658 |
| ENST00000361381.2 | 780  | 799  | -0.51366113  | -0.122903995 |
| NM_001178042      | 460  | 479  | -0.228316642 | -0.185248251 |
| NM_001697         | 140  | 159  | -0.463827537 | -0.336623693 |
| NM_001827         | 420  | 439  | -0.11596378  | -0.173078644 |
| NM_001568         | 1140 | 1159 | -0.298552397 | -0.127304035 |
| NM_001042559      | 1180 | 1199 | -0.349896164 | -0.338763907 |
| NM_001002         | 1060 | 1079 | -0.403000095 | -0.112123946 |
| NM_004663         | 460  | 479  | -0.375617366 | -0.754952451 |
| NM_199246         | 240  | 259  | -0.037922766 | -0.012330263 |
| NM_000967         | 980  | 999  | -0.53825931  | -0.175156451 |
| NM_001007         | 400  | 419  | -0.436980783 | -0.355829058 |
| NM_001402         | 1460 | 1479 | -0.685460201 | -0.51522235  |
| NM_001198843      | 260  | 279  | -0.147782159 | -0.004053478 |
| ENST00000362079.2 | 320  | 339  | -0.772982639 | -0.143185144 |
| ENST00000389680.2 | 720  | 739  | -0.409320453 | -0.072967856 |
| NM_001199954      | 1300 | 1319 | -0.205379977 | -0.173425765 |
| NM_001123         | 1140 | 1159 | -0.613089599 | -0.769373023 |
| NM_001007073      | 400  | 419  | -0.053908966 | -0.152699478 |
| NR_045277         | 580  | 599  | -0.097429776 | -0.127846707 |
| NM_006082         | 320  | 339  | -0.806133127 | -0.244010577 |
| NM_002896         | 260  | 279  | -0.147782159 | -0.004053478 |
| NM_001006         | 160  | 179  | -0.113842345 | -0.342744676 |
| NM_004048         | 740  | 759  | -0.155537161 | -0.151842843 |
| ENST00000361739.1 | 80   | 99   | -0.753592814 | -0.332531865 |
| NM_003958         | 1280 | 1299 | -0.427138777 | -0.01058505  |
| ENST00000361390.2 | 840  | 859  | -0.677599531 | -0.16963943  |
| NM_016587         | 340  | 359  | -0.178952654 | -0.298418901 |
| NM_001207019      | 360  | 379  | -0.449648775 | -0.177140607 |
| NR_027159         | 1000 | 1019 | -0.452910778 | -0.418136331 |
| NM_001135699      | 1260 | 1279 | -0.394800313 | -0.214759057 |
| NM_001034077      | 120  | 139  | -0.127569569 | -0.064450182 |
| NM_001689         | 520  | 539  | -0.048662264 | -0.140661287 |
| NM_004152         | 180  | 199  | -0.303819057 | -0.313753689 |

|                   |      |      |              |              |
|-------------------|------|------|--------------|--------------|
| NM_001865         | 260  | 279  | -0.452251612 | -0.589380281 |
| NR_003038         | 60   | 79   | -0.316649386 | -0.171889139 |
| NM_020810         | 5200 | 5219 | -0.116121181 | -0.161670988 |
| NM_001099285      | 620  | 639  | -0.295474858 | -0.147800446 |
| NM_001165931      | 1060 | 1079 | -0.470449695 | -0.526426248 |
| ENST00000409170.3 | 200  | 219  | -0.343567706 | -0.326328991 |
| NR_026673         | 340  | 359  | -0.239164395 | -0.315241755 |
| NM_033022         | 440  | 459  | -0.188530743 | -0.094882476 |
| NM_198336         | 2160 | 2179 | -0.404235313 | -0.393501193 |
| NM_001204861      | 360  | 379  | -0.298955196 | -0.41263682  |
| NM_080425         | 2900 | 2919 | -0.255394405 | -0.65330735  |
| ENST00000361381.2 | 640  | 659  | -0.354718335 | -0.528320926 |
| NM_001145160      | 900  | 919  | -0.288539409 | -0.408301341 |
| NM_002106         | 720  | 739  | -0.380358044 | -0.421598058 |
| NM_002013         | 120  | 139  | -0.493331873 | -0.449498428 |
| NM_003548         | 120  | 139  | -0.127569569 | -0.064450182 |
| ENST00000361381.2 | 280  | 299  | -0.372376224 | -0.446777962 |
| NM_006808         | 420  | 439  | -0.070994883 | -0.181863494 |
| ENST00000361624.2 | 400  | 419  | -0.397237893 | -0.35561426  |
| NR_036430         | 200  | 219  | -0.638317207 | -0.5606212   |
| NM_002727         | 660  | 679  | -0.65220296  | -0.069268702 |
| NM_005319         | 80   | 99   | -0.216355572 | -0.05389996  |
| ENST00000362079.2 | 200  | 219  | -0.015811505 | -0.030480218 |
| NM_001568         | 740  | 759  | -0.618279665 | -0.108484247 |
| NM_001142283      | 440  | 459  | -0.188530743 | -0.094882476 |
| NM_033318         | 400  | 419  | -0.800735045 | -0.430783768 |
| NM_001402         | 1000 | 1019 | -0.197143828 | -0.225598367 |
| NM_002792         | 820  | 839  | -0.784634319 | -0.869448663 |
| NM_001168254      | 620  | 639  | -0.421534725 | -0.235648849 |
| NM_003544         | 120  | 139  | -0.02784518  | -0.317787056 |
| NM_000992         | 40   | 59   | -0.225176374 | -0.483393327 |
| ENST00000541726.1 | 500  | 519  | -0.342478941 | -0.65253573  |
| NM_005004         | 560  | 579  | -0.351843515 | -0.529014593 |
| NM_001135239      | 700  | 719  | -0.077764685 | -0.063947506 |
| ENST00000409170.3 | 140  | 159  | -0.36477519  | -0.359309618 |
| NM_001866         | 320  | 339  | -0.018349909 | -0.347499978 |
| NM_006762         | 1100 | 1119 | -0.388723298 | -0.49118284  |
| NM_001664         | 1400 | 1419 | -0.615409919 | -0.075369126 |
| NR_037688         | 120  | 139  | -0.194928776 | -0.244555431 |
| NM_006713         | 340  | 359  | -0.470122747 | -0.292371691 |
| NM_021009         | 1640 | 1659 | -0.130899292 | -0.002244493 |
| NM_014670         | 960  | 979  | -0.520997491 | -0.157322008 |
| NM_145690         | 1320 | 1339 | -0.491724869 | -0.233979189 |
| NM_016091         | 380  | 399  | -0.552873205 | -0.254427472 |
| NM_012423         | 420  | 439  | -0.213659545 | -0.149758473 |
| NR_003716         | 920  | 939  | -0.04324156  | -0.011135909 |
| NM_002787         | 700  | 719  | -0.516545429 | -0.066547556 |
| NM_001253379      | 880  | 899  | -0.507421695 | -0.382725018 |
| NR_003033         | 0    | 19   | -0.548594895 | -0.050768947 |
| NM_001113203      | 2900 | 2919 | -0.461904864 | -0.698574654 |
| NM_199440         | 1960 | 1979 | -0.409926548 | -0.322966144 |
| NM_002823         | 980  | 999  | -0.165551756 | -0.007639937 |
| NR_033697         | 580  | 599  | -0.462614035 | -0.022457011 |
| NM_002002         | 460  | 479  | -0.13567989  | -0.531734326 |
| NR_027164         | 860  | 879  | -0.482280194 | -0.509097612 |
| NM_003295         | 280  | 299  | -0.734579257 | -0.59410511  |
| NM_031157         | 1280 | 1299 | -0.062137424 | -0.588911232 |
| NR_026712         | 260  | 279  | -0.444262412 | -0.213862774 |
| NM_144646         | 240  | 259  | -0.353438802 | -0.003492309 |

|                   |      |      |              |               |
|-------------------|------|------|--------------|---------------|
| NM_013341         | 240  | 259  | -0.363919125 | -0.405780724  |
| ENST00000505955.1 | 580  | 599  | -0.066468039 | -0.68428227   |
| NM_001146227      | 60   | 79   | -0.307379141 | -0.123003289  |
| NM_002568         | 2560 | 2579 | -0.091150359 | -0.101427718  |
| NR_027170         | 780  | 799  | -0.375067063 | -0.505783283  |
| NM_004462         | 860  | 879  | -0.556543589 | -0.513112723  |
| NM_018955         | 840  | 859  | -0.325020335 | -0.401692129  |
| NR_047688         | 160  | 179  | -0.095906613 | -0.285439788  |
| NM_015380         | 580  | 599  | -0.57467412  | -0.844609781  |
| NM_000126         | 360  | 379  | -0.050833884 | -0.077786465  |
| NM_016093         | 440  | 459  | -0.398457878 | -0.356017757  |
| NM_000986         | 220  | 239  | -0.396606993 | -0.461295486  |
| NM_006585         | 960  | 979  | -0.084685042 | -0.202297496  |
| NM_000977         | 600  | 619  | -0.208382239 | -0.211729242  |
| NM_002032         | 740  | 759  | -0.036213397 | -0.015616761  |
| NM_001270439      | 880  | 899  | -0.018645021 | -0.186544707  |
| NM_001253383      | 420  | 439  | -0.115230438 | -0.242398156  |
| NM_033251         | 780  | 799  | -0.13389527  | -0.045323352  |
| NM_001207069      | 640  | 659  | -0.520997491 | -0.157322008  |
| NM_001253380      | 760  | 779  | -0.122659306 | -0.217786181  |
| NM_016093         | 420  | 439  | -0.017497059 | -0.276599695  |
| ENST00000517961.1 | 60   | 79   | -0.127097968 | -0.240909567  |
| ENST00000390306.2 | 180  | 199  | -0.48500695  | -0.363256423  |
| NR_023343         | 60   | 79   | -0.158389711 | -0.192790856  |
| NR_027160         | 1120 | 1139 | -0.492002328 | -0.396274354  |
| NM_014426         | 940  | 959  | -0.6237011   | -0.693788388  |
| NM_001184979      | 40   | 59   | -0.15813614  | -0.378405405  |
| NM_000968         | 840  | 859  | -0.665242076 | -0.302607081  |
| NR_002944         | 1080 | 1099 | -0.061033059 | -0.712819299  |
| NM_006263         | 800  | 819  | -0.864507658 | -0.244082012  |
| NM_003333         | 200  | 219  | -0.298152956 | -0.189085602  |
| NM_001113202      | 760  | 779  | -0.129032167 | -0.126380518  |
| NM_004537         | 520  | 539  | -0.348344667 | -0.408506667  |
| NM_176783         | 980  | 999  | -0.869354555 | -0.271716446  |
| NR_002325         | 20   | 39   | -0.056752754 | -0.087995358  |
| ENST00000544920.1 | 220  | 239  | -0.072295173 | -0.524075428  |
| NM_006577         | 1420 | 1439 | -0.137795517 | -0.404256203  |
| NM_178587         | 780  | 799  | -0.773949041 | -0.447467809  |
| ENST00000425943.2 | 400  | 419  | -0.151812195 | -0.160732126  |
| NM_001242348      | 760  | 779  | -0.31421294  | -0.329189261  |
| NR_002201         | 560  | 579  | -0.303622216 | -0.164964457  |
| NM_001127711      | 320  | 339  | -0.394937596 | -0.347755909  |
| NM_001002258      | 700  | 719  | -0.141960923 | -0.118273703  |
| NM_002727         | 800  | 819  | -0.524972424 | -0.428232613  |
| NM_015640         | 1400 | 1419 | -0.165928618 | -0.418966011  |
| NM_001256892      | 220  | 239  | -0.076605531 | -0.096266298  |
| NM_001040033      | 1320 | 1339 | -0.495275526 | -0.182256066  |
| NM_002156         | 1980 | 1999 | -0.409926548 | -0.322966144  |
| NM_013238         | 640  | 659  | -0.103097346 | -0.428768718  |
| NR_027667         | 1040 | 1059 | -0.615558702 | -0.360689772  |
| NM_002568         | 1000 | 1019 | -0.269483032 | -0.200116747  |
| NM_139207         | 480  | 499  | -0.102434591 | -0.032271663  |
| ENST00000390323.2 | 300  | 319  | -0.132975029 | -0.1711058185 |
| NR_002440         | 0    | 19   | -0.149326073 | -0.302319501  |
| NM_001206426      | 160  | 179  | -0.214292387 | -0.312141169  |
| NM_001967         | 280  | 299  | -0.423760237 | -0.137568806  |
| NR_045027         | 940  | 959  | -0.445901616 | -0.318593362  |
| ENST00000362808.1 | 0    | 19   | -0.395266884 | -0.322434414  |
| NM_001014         | 520  | 539  | -0.187606369 | -0.108822766  |

|                   |      |      |              |              |
|-------------------|------|------|--------------|--------------|
| NM_001265605      | 1620 | 1639 | -0.437420046 | -0.085154922 |
| NM_002948         | 680  | 699  | -0.574661679 | -0.411989586 |
| NM_001024662      | 400  | 419  | -0.065536398 | -0.199158243 |
| NM_006281         | 660  | 679  | -0.490065096 | -0.202190245 |
| NM_032704         | 940  | 959  | -0.60164502  | -0.948928328 |
| NM_001253380      | 900  | 919  | -0.353931042 | -0.215962817 |
| NM_002952         | 640  | 659  | -0.167668642 | -0.159585177 |
| NR_027167         | 800  | 819  | -0.506982038 | -0.409755074 |
| NM_001688         | 580  | 599  | -0.473752666 | -0.445978088 |
| NM_001034         | 900  | 919  | -0.484624103 | -0.609451301 |
| NR_026712         | 240  | 259  | -0.115252853 | -0.340916163 |
| NR_002819         | 2460 | 2479 | -0.335608903 | -0.334308183 |
| NM_032747         | 360  | 379  | -0.146912903 | -0.016696535 |
| ENST00000546176.1 | 200  | 219  | -0.074854572 | -0.009721027 |
| NM_170679         | 460  | 479  | -0.475247351 | -0.2754674   |
| NM_198337         | 2240 | 2259 | -0.409747022 | -0.722190577 |
| NR_045277         | 600  | 619  | -0.053562544 | -0.007707566 |
| NM_001614         | 1180 | 1199 | -0.100124357 | -0.057879976 |
| NM_003544         | 40   | 59   | -0.148977387 | -0.235033119 |
| NM_000884         | 580  | 599  | -0.15885861  | -0.164391458 |
| NM_001142285      | 440  | 459  | -0.016591727 | -0.019164812 |
| NM_015932         | 600  | 619  | -0.059119991 | -0.19470679  |
| ENST00000361899.2 | 560  | 579  | -0.094326534 | -0.345404473 |
| NM_170679         | 740  | 759  | -0.245135783 | -0.539542164 |
| NM_002884         | 1300 | 1319 | -0.299181175 | -0.321835264 |
| NM_000971         | 60   | 79   | -0.531471558 | -0.271586395 |
| NM_001123375      | 200  | 219  | -0.106019257 | -0.301963903 |
| NM_016226         | 140  | 159  | -0.460592668 | -0.295006624 |
| ENST00000361624.2 | 900  | 919  | -0.059316682 | -0.287957663 |
| NM_015702         | 460  | 479  | -0.247714773 | -0.24921475  |
| NR_002559         | 0    | 19   | -0.330761418 | -0.262483793 |
| NM_001253382      | 400  | 419  | -0.270627638 | -0.064448318 |
| NM_170738         | 360  | 379  | -0.12424827  | -0.040587075 |
| NR_000009         | 0    | 19   | -0.024351572 | -0.331863977 |
| NM_001256721      | 360  | 379  | -0.259727564 | -0.330587299 |
| NM_006721         | 940  | 959  | -0.314187796 | -0.333416144 |
| NM_001099671      | 40   | 59   | -0.350662166 | -0.454559354 |
| ENST00000365328.1 | 60   | 79   | -0.351800676 | -0.352191227 |
| ENST00000401830.3 | 520  | 539  | -0.301890281 | -0.215842668 |
| NM_021062         | 140  | 159  | -0.25117141  | -0.649144708 |
| NM_001113203      | 2640 | 2659 | -0.623871539 | -0.357389167 |
| NM_001267817      | 360  | 379  | -0.455171151 | -0.152639606 |
| NM_000989         | 300  | 319  | -0.403007989 | -0.191770629 |
| NM_006325         | 780  | 799  | -0.599217814 | -0.538527206 |
| NM_001002031      | 680  | 699  | -0.810062207 | -0.745337284 |
| NM_005721         | 2500 | 2519 | -0.656044861 | -0.445400938 |
| NM_006294         | 200  | 219  | -0.704147113 | -0.290461294 |
| NR_002312         | 60   | 79   | -0.016933223 | -0.145245192 |
| NR_003662         | 1000 | 1019 | -0.12540332  | -0.248803361 |
| NR_027168         | 820  | 839  | -0.446210668 | -0.372399942 |
| NR_003048         | 0    | 19   | -0.504178485 | -0.154171886 |
| NM_017830         | 600  | 619  | -0.442173531 | -0.191374494 |
| NR_002308         | 320  | 339  | -0.186774914 | -0.050673929 |
| NM_001204091      | 520  | 539  | -0.192349971 | -0.043289116 |
| NM_003366         | 1060 | 1079 | -0.557721891 | -0.256645284 |
| NM_007104         | 520  | 539  | -0.364008309 | -0.317516707 |
| NM_001144831      | 1240 | 1259 | -0.505256536 | -0.235185917 |
| NM_001253379      | 1000 | 1019 | -0.42457762  | -0.239472524 |
| NM_001010         | 160  | 179  | -0.371427457 | -0.013200945 |

|                   |      |      |              |              |
|-------------------|------|------|--------------|--------------|
| NM_000973         | 480  | 499  | -0.384354952 | -0.115759735 |
| TCONS_00007196    | 80   | 99   | -0.00459122  | -0.165239265 |
| NM_030939         | 340  | 359  | -0.266711128 | -0.400964464 |
| NM_001199344      | 300  | 319  | -0.134459351 | -0.137557674 |
| NM_001402         | 980  | 999  | -0.031862756 | -0.042790847 |
| ENST00000361739.1 | 380  | 399  | -0.39009199  | -0.320015606 |
| NM_001762         | 1980 | 1999 | -0.101349224 | -0.012381972 |
| NR_023358         | 260  | 279  | -0.426876219 | -0.412712845 |
| NM_001207         | 820  | 839  | -0.131195675 | -0.132272238 |
| NM_014402         | 140  | 159  | -0.409274052 | -0.286327699 |
| NM_003530         | 200  | 219  | -0.336344076 | -0.612440387 |
| NM_001135239      | 1520 | 1539 | -0.28453889  | -0.584152447 |
| NM_001142282      | 300  | 319  | -0.009120161 | -0.267985714 |
| NM_001253380      | 640  | 659  | -0.500206043 | -0.329038019 |
| NM_053275         | 740  | 759  | -0.14667491  | -0.041034054 |
| NM_001130440      | 560  | 579  | -0.496144706 | -0.564502804 |
| NM_004552         | 140  | 159  | -0.369028694 | -0.440766154 |
| NM_001814         | 1500 | 1519 | -0.663270254 | -0.611789318 |
| NM_007276         | 1840 | 1859 | -0.133069402 | -0.384493208 |
| NR_028500         | 1580 | 1599 | -0.44041399  | -0.529217261 |
| NR_003662         | 1260 | 1279 | -0.055448044 | -0.489107652 |
| NM_001006         | 260  | 279  | -0.441360378 | -0.819610125 |
| NM_001207067      | 960  | 979  | -0.520997491 | -0.157322008 |
| ENST00000387429.1 | 0    | 19   | -0.108562576 | -0.203734359 |
| NM_006191         | 1260 | 1279 | -0.373162586 | -0.05656843  |
| NM_012423         | 260  | 279  | -0.444262412 | -0.213862774 |
| NM_021058         | 20   | 39   | -0.174177031 | -0.060855929 |
| NM_001402         | 860  | 879  | -0.122549419 | -0.147440294 |
| NM_198195         | 320  | 339  | -0.386291257 | -0.173906376 |
| NM_001614         | 120  | 139  | -0.194928776 | -0.244555431 |
| NR_003140         | 0    | 19   | -0.300021511 | -0.120156077 |
| NM_003514         | 280  | 299  | -0.400000645 | -0.348130515 |
| NR_027158         | 680  | 699  | -0.405990024 | -0.473714867 |
| NM_001204862      | 220  | 239  | -0.142567373 | -0.363162915 |
| NM_000968         | 660  | 679  | -0.134219327 | -0.167210186 |
| NM_002823         | 620  | 639  | -0.250917862 | -0.16184197  |
| NM_004872         | 820  | 839  | -0.563693474 | -0.637574225 |
| NM_001037637      | 1060 | 1079 | -0.06800723  | -0.09042978  |
| ENST00000553637.1 | 40   | 59   | -0.33339416  | -0.436140016 |
| NM_003910         | 260  | 279  | -0.208219999 | -0.086204129 |
| NM_021009         | 1900 | 1919 | -0.198710601 | -0.264185828 |
| NM_004951         | 640  | 659  | -0.18603705  | -0.382428089 |
| NM_015932         | 220  | 239  | -0.359830256 | -0.204407222 |
| NM_001040158      | 720  | 739  | -0.22826572  | -0.526346719 |
| NM_016587         | 180  | 199  | -0.575401056 | -0.344060856 |
| NM_001253384      | 600  | 619  | -0.092326811 | -0.161427249 |
| NM_007107         | 200  | 219  | -0.071340006 | -0.421786732 |
| NM_001198844      | 260  | 279  | -0.147782159 | -0.004053478 |
| NM_001007074      | 420  | 439  | -0.053908966 | -0.152699478 |
| NM_001265604      | 660  | 679  | -0.536858547 | -0.446752471 |
| ENST00000446441.2 | 400  | 419  | -0.399460686 | -0.126892513 |
| NM_178586         | 780  | 799  | -0.773949041 | -0.447467809 |
| NM_000661         | 140  | 159  | -0.308937896 | -0.431076652 |
| NM_004255         | 480  | 499  | -0.138780213 | -0.260500543 |
| NM_001031684      | 1000 | 1019 | -0.235959902 | -0.540254753 |
| NM_001025249      | 600  | 619  | -0.056955434 | -0.200106455 |
| NM_001077490      | 2720 | 2739 | -0.203805329 | -0.183753661 |
| NM_006930         | 1440 | 1459 | -0.138490883 | -0.321676993 |
| ENST00000513764.1 | 40   | 59   | -0.07547383  | -0.144894033 |



|                   |      |      |              |              |
|-------------------|------|------|--------------|--------------|
| NM_020675         | 420  | 439  | -0.13627614  | -0.266915888 |
| NM_005517         | 760  | 779  | -0.048838603 | -0.281932393 |
| NM_006597         | 1420 | 1439 | -0.013624334 | -0.057262638 |
| NM_007285         | 560  | 579  | -0.220398245 | -0.480959315 |
| NM_003133         | 580  | 599  | -0.243104148 | -0.408481873 |
| NM_001199973      | 280  | 299  | -0.019584188 | -0.113036153 |
| NM_006930         | 1580 | 1599 | -0.009414037 | -0.385135816 |
| NR_047518         | 980  | 999  | -0.080854076 | -0.043139852 |
| NM_001265605      | 560  | 579  | -0.536858547 | -0.446752471 |
| NM_000970         | 820  | 839  | -0.09290719  | -0.020310181 |
| NM_004060         | 2180 | 2199 | -0.843638589 | -0.64862069  |
| NM_016491         | 860  | 879  | -0.770772579 | -0.681672201 |
| NM_001012985      | 540  | 559  | -0.15518271  | -0.011804517 |
| NM_015161         | 2040 | 2059 | -0.070459003 | -0.314251486 |
| NM_001034996      | 300  | 319  | -0.31013116  | -0.286338737 |
| NM_003295         | 300  | 319  | -0.507894525 | -0.507327795 |
| ENST00000361624.2 | 280  | 299  | -0.045668236 | -0.187568243 |
| NM_003542         | 180  | 199  | -0.42353681  | -0.49916251  |
| NM_001253383      | 380  | 399  | -0.335654438 | -0.125835651 |
| NM_002738         | 900  | 919  | -0.11250125  | -0.148073792 |
| NM_003134         | 360  | 379  | -0.435535268 | -0.603543045 |
| NM_001101         | 1680 | 1699 | -0.528161363 | -0.329176802 |
| NR_037926         | 2620 | 2639 | -0.399171337 | -0.572396658 |
| NR_036430         | 820  | 839  | -0.006853085 | -0.288836133 |
| NM_001099670      | 40   | 59   | -0.350662166 | -0.394600832 |
| NM_018465         | 660  | 679  | -0.177908364 | -0.213415843 |
| NM_002787         | 340  | 359  | -0.017740702 | -0.285795047 |
| ENST00000446441.2 | 180  | 199  | -0.518286005 | -0.351091822 |
| NM_002727         | 340  | 359  | -0.227401736 | -0.17829023  |
| ENST00000387314.1 | 20   | 39   | -0.842083984 | -0.833446986 |
| NM_001199355      | 100  | 119  | -0.161619152 | -0.121208695 |
| NM_003017         | 760  | 779  | -0.296729404 | -0.361280333 |
| ENST00000361624.2 | 920  | 939  | -0.13581833  | -0.096209151 |
| ENST00000361624.2 | 1220 | 1239 | -0.08423603  | -0.105344102 |
| NM_014412         | 660  | 679  | -0.017261082 | -0.227288721 |
| NM_001165258      | 360  | 379  | -0.024901469 | -0.5824828   |
| NM_002793         | 740  | 759  | -0.178363411 | -0.163687602 |
| NM_016050         | 440  | 459  | -0.165432476 | -0.024008976 |
| NR_036610         | 1220 | 1239 | -0.292939474 | -0.365125466 |
| ENST00000438607.2 | 240  | 259  | -0.007470554 | -0.050288176 |
| NM_021227         | 560  | 579  | -0.573976914 | -0.372513116 |
| NM_003509         | 380  | 399  | -0.271802184 | -0.090861927 |
| NM_001007         | 80   | 99   | -0.15650448  | -0.25897723  |
| NM_021237         | 500  | 519  | -0.342478941 | -0.649588461 |
| NM_001165415      | 1420 | 1439 | -0.308381295 | -0.501485169 |
| NM_033301         | 520  | 539  | -0.592358913 | -0.099078684 |
| NM_001002258      | 720  | 739  | -0.018667608 | -0.517825277 |
| NM_016139         | 720  | 739  | -0.346317324 | -0.116080706 |
| NM_080426         | 820  | 839  | -0.203805329 | -0.183753661 |
| NR_047517         | 2160 | 2179 | -0.332891123 | -0.54899731  |
| NM_001012321      | 120  | 139  | -0.309043961 | -0.181674883 |
| NM_003017         | 840  | 859  | -0.54632693  | -0.157066999 |
| NM_002719         | 780  | 799  | -0.773949041 | -0.447467809 |
| NR_036610         | 1160 | 1179 | -0.110277053 | -0.02094546  |
| NM_014463         | 120  | 139  | -0.099818437 | -0.430835587 |
| NM_001011725      | 2040 | 2059 | -0.229125525 | -0.466823257 |
| NM_001948         | 480  | 499  | -0.498421233 | -0.399406707 |
| NM_005499         | 540  | 559  | -0.624406751 | -0.541898227 |
| NM_178547         | 220  | 239  | -0.66033831  | -0.696367099 |

|                   |      |      |              |              |
|-------------------|------|------|--------------|--------------|
| NM_001142282      | 440  | 459  | -0.188530743 | -0.094882476 |
| NM_003908         | 340  | 359  | -0.139343179 | -0.281139085 |
| NM_001099285      | 900  | 919  | -0.501518458 | -0.041852459 |
| NM_001113203      | 2700 | 2719 | -0.202793364 | -0.262270473 |
| NM_033301         | 860  | 879  | -0.745231956 | -0.484916974 |
| NM_001077488      | 1040 | 1059 | -0.215911591 | -0.68278247  |
| NR_037929         | 860  | 879  | -0.442297807 | -0.498940623 |
| NM_006597         | 1700 | 1719 | -0.491953564 | -0.0655661   |
| NM_001034996      | 740  | 759  | -0.320375215 | -0.497664763 |
| NR_027161         | 1120 | 1139 | -0.422343511 | -0.406172776 |
| NM_021018         | 180  | 199  | -0.292673139 | -0.031556475 |
| ENST00000448615.2 | 660  | 679  | -0.273947543 | -0.14396371  |
| NM_002295         | 920  | 939  | -0.036264767 | -0.400631244 |
| NM_001142284      | 440  | 459  | -0.188530743 | -0.094882476 |
| NM_001404         | 200  | 219  | -0.364533773 | -0.048956462 |
| NM_002046         | 1320 | 1339 | -0.019913874 | -0.476245144 |
| NM_001568         | 1440 | 1459 | -0.153059687 | -0.199396342 |
| ENST00000361453.3 | 880  | 899  | -0.365528648 | -0.075428443 |
| NM_001243131      | 460  | 479  | -0.157985927 | -0.120041048 |
| NM_001035258      | 40   | 59   | -0.793348759 | -0.710099561 |
| NM_000985         | 460  | 479  | -0.073218918 | -0.059590191 |
| NM_000970         | 580  | 599  | -0.027225022 | -0.541829767 |
| ENST00000435879.2 | 420  | 439  | -0.01810107  | -0.014137736 |
| NM_033280         | 600  | 619  | -0.553467208 | -0.020273252 |
| NM_001142285      | 300  | 319  | -0.07520626  | -0.32702401  |
| NM_001539         | 1300 | 1319 | -0.433086333 | -0.23221574  |
| NM_005022         | 260  | 279  | -0.060840127 | -0.354508795 |
| NM_001035258      | 220  | 239  | -0.078060943 | -0.075731998 |
| NM_003539         | 220  | 239  | -0.519977116 | -0.190047207 |
| NR_045277         | 800  | 819  | -0.096374457 | -0.098220292 |
| NM_000975         | 40   | 59   | -0.045849459 | -0.168779483 |
| NR_026712         | 420  | 439  | -0.080584634 | -0.009204381 |
| NM_006098         | 760  | 779  | -0.491931228 | -0.492839702 |
| NM_014426         | 900  | 919  | -0.198676839 | -0.189013521 |
| NM_001002251      | 580  | 599  | -0.56470539  | -0.238783691 |
| NR_003932         | 420  | 439  | -0.080584634 | -0.009204381 |
| NM_002488         | 460  | 479  | -0.462614035 | -0.022457011 |
| NM_001012321      | 860  | 879  | -0.440508409 | -0.414467389 |
| NM_001199954      | 240  | 259  | -0.375165417 | -0.453192702 |
| NM_001156         | 560  | 579  | -0.414706681 | -0.221668639 |
| NM_016619         | 440  | 459  | -0.269228515 | -0.169142883 |
| NM_006793         | 280  | 299  | -0.19189721  | -0.246096039 |
| NM_005888         | 1180 | 1199 | -0.215298626 | -0.373512686 |
| NR_002315         | 740  | 759  | -0.243025935 | -0.060961314 |
| NM_007276         | 400  | 419  | -0.347711181 | -0.390730686 |
| NM_000994         | 300  | 319  | -0.080497979 | -0.210810297 |
| NM_001418         | 1180 | 1199 | -0.349896164 | -0.338763907 |
| ENST00000540179.1 | 180  | 199  | -0.127534899 | -0.116682855 |
| NM_001404         | 1440 | 1459 | -0.431468398 | -0.223370397 |
| ENST00000495461.1 | 520  | 539  | -0.210485041 | -0.439448152 |
| NM_001005782      | 260  | 279  | -0.554041134 | -0.620070872 |
| NR_003010         | 20   | 39   | -0.826165476 | -0.532888893 |
| NM_003973         | 240  | 259  | -0.643367556 | -0.578004436 |
| NM_001011724      | 2180 | 2199 | -0.305077486 | -0.548278235 |
| NM_001077490      | 2900 | 2919 | -0.255394405 | -0.65330735  |

**Supplementary Table 2 Top 2000 genes with biggest gene level structural disruptions**

| <b>Transcript</b> | <b>Pearson Correlation</b> | <b>Transcript Coverage</b> | <b>Transcript Length</b> | <b>eSDC</b> |
|-------------------|----------------------------|----------------------------|--------------------------|-------------|
| NR_001564         | 0.003262207                | 24.21571577                | 19279                    | 138.395885  |
| TCONS_00016926    | 0.003189958                | 24.02060732                | 19264                    | 138.3520629 |
| TCONS_00017342    | 0.003280692                | 25.10391299                | 16917                    | 129.6386638 |
| TCONS_00017339    | 0.003348584                | 25.19669607                | 16888                    | 129.5186766 |
| NM_001134407      | -0.01765816                | 1.01838736                 | 14683                    | 123.3131292 |
| NM_000833         | -0.017646943               | 1.0359269                  | 14445                    | 122.3082931 |
| NM_182961         | 0.28539858                 | 1.221205132                | 27747                    | 119.0342369 |
| NM_033071         | 0.284714028                | 1.23510332                 | 27438                    | 118.4829705 |
| TCONS_00017337    | -0.001623401               | 23.39395973                | 13409                    | 115.985222  |
| TCONS_00017340    | -0.030463143               | 25.20743187                | 12109                    | 113.3930932 |
| ENST00000561463.1 | 0.121827002                | 3.215183142                | 15042                    | 107.7042576 |
| NM_020759         | 0.163856854                | 1.365631417                | 15583                    | 104.3773267 |
| NM_001014797      | 0.058317438                | 1.231699183                | 11993                    | 103.1260647 |
| NM_144666         | 0.174080205                | 1.49878902                 | 14863                    | 100.6911066 |
| NM_033656         | 0.256703707                | 1.550598233                | 17885                    | 99.40459019 |
| NM_001205293      | 0.192947835                | 3.368438494                | 15087                    | 99.12953118 |
| NM_000721         | 0.191792091                | 3.343806404                | 14958                    | 98.84617325 |
| NM_001205294      | 0.191616812                | 3.295329486                | 14901                    | 98.67905462 |
| NR_026800         | 0                          | 4.116196817                | 9612                     | 98.04080783 |
| NM_173569         | 0.190458758                | 1.387496538                | 14443                    | 97.28988377 |
| NM_015512         | 0.151381975                | 1.130587338                | 13109                    | 97.16213159 |
| NM_005909         | 0.112584394                | 1.270306369                | 11978                    | 97.12235759 |
| NM_080685         | -0.036326782               | 6.002798181                | 8576                     | 95.97079842 |
| NM_080683         | -0.036175493               | 6.037724831                | 8561                     | 95.87283389 |
| NM_006264         | -0.036355796               | 6.029276896                | 8504                     | 95.56976241 |
| NM_014911         | 0.344998795                | 2.138208324                | 21264                    | 95.51346063 |
| NM_021116         | 0.151106854                | 2.049527924                | 12497                    | 94.89774918 |
| NM_004654         | 0.057149244                | 1.26314741                 | 10039                    | 94.46875256 |
| NM_007249         | 0.102710339                | 2.061142176                | 10908                    | 93.71416252 |
| NM_182914         | 0.367178075                | 4.528728802                | 21876                    | 93.59776417 |
| NM_017759         | 0.214303218                | 1.952886248                | 14135                    | 93.41204515 |
| NM_001009899      | 0.203211505                | 1.850660247                | 13706                    | 93.28212233 |
| NM_015180         | 0.370760574                | 4.570491954                | 21810                    | 92.92739424 |
| NM_021961         | 0.042954233                | 1.106096007                | 9415                     | 92.86303399 |
| NM_080684         | -0.037848507               | 5.930279134                | 7988                     | 92.75834532 |
| NM_017412         | 0.210915073                | 1.579821571                | 13786                    | 92.64945839 |
| NM_001008537      | 0.146582317                | 1.408295639                | 11716                    | 92.37433365 |
| NM_145866         | 0.212697872                | 1.575722291                | 13740                    | 92.2857809  |
| NM_173690         | 0.16672504                 | 1.12039312                 | 12209                    | 92.07216992 |
| NM_015378         | 0.28297678                 | 2.276151396                | 16327                    | 91.61918339 |
| NM_001144877      | 0.168849507                | 1.113582077                | 12140                    | 91.57754783 |
| NM_002336         | 0.089510189                | 1.264306258                | 10082                    | 91.42151982 |
| NM_000092         | 0.103162674                | 1.202301518                | 10340                    | 91.19561244 |
| NM_018156         | 0.286086593                | 2.286839353                | 16252                    | 91.01206008 |
| NM_004274         | 0.115002464                | 1.042071821                | 10386                    | 90.19162683 |
| NM_001145365      | 0.161709996                | 1.521754264                | 11491                    | 89.86140402 |
| NM_024408         | 0.163607257                | 2.615733473                | 11465                    | 89.55653572 |
| NM_014897         | 0.16139957                 | 1.537410769                | 11346                    | 89.32570868 |
| NM_000081         | 0.23055525                 | 1.347135649                | 13475                    | 89.31858362 |
| NM_015284         | 0.249095936                | 2.667072037                | 13978                    | 88.77833033 |
| NM_024503         | 0.203191433                | 1.540799871                | 12401                    | 88.73242455 |
| NM_014786         | -0.001431978               | 1.07077947                 | 7812                     | 88.51208533 |
| NM_134260         | 0.156678602                | 1.158665212                | 10997                    | 88.43623244 |
| NM_002943         | 0.156626589                | 1.161563696                | 10973                    | 88.34512604 |

|                   |             |             |       |             |
|-------------------|-------------|-------------|-------|-------------|
| NM_001127714      | 0.205499651 | 1.537705983 | 12318 | 88.17880163 |
| NM_006885         | 0.304695577 | 2.360913958 | 16061 | 88.11732064 |
| NM_007314         | 0.203730123 | 1.274392737 | 12226 | 88.04455083 |
| NM_001168236      | 0.203681322 | 1.278444591 | 12163 | 87.82279523 |
| NM_134261         | 0.156653091 | 1.176856298 | 10827 | 87.75266725 |
| NM_001162501      | 0.351998637 | 3.549070022 | 18279 | 87.60968848 |
| NM_001410         | 0.163788304 | 1.469086267 | 10965 | 87.56298448 |
| NR_033289         | 0.162268309 | 1.008882784 | 10919 | 87.53795124 |
| NM_015312         | 0.300923361 | 3.070882825 | 15574 | 87.24185171 |
| TCONS_00029545    | 0.14419381  | 1.017075053 | 10365 | 87.12846775 |
| NM_015088         | 0.350239873 | 3.611866295 | 17949 | 87.05088404 |
| NM_003482         | 0.37548871  | 5.291879087 | 19418 | 87.02470154 |
| NM_005158         | 0.205102282 | 1.292462312 | 11939 | 86.85508032 |
| NM_134262         | 0.159842541 | 1.208829319 | 10668 | 86.77651226 |
| NM_012194         | 0.197682253 | 2.327194492 | 11619 | 86.4830056  |
| NM_182643         | 0           | 1.682577885 | 7478  | 86.47543004 |
| NM_024734         | 0.234952944 | 2.417647059 | 12749 | 86.38258752 |
| NM_015279         | 0.024902767 | 1.232234151 | 7823  | 86.24513164 |
| NM_001024843      | 0.318688541 | 3.242997682 | 15958 | 86.06665494 |
| NR_033319         | 0.142421661 | 1.04624105  | 10055 | 85.99334455 |
| NR_003491         | 0.149770868 | 1.046454528 | 10181 | 85.7889199  |
| NR_033320         | 0.146842746 | 1.041650178 | 10107 | 85.77095007 |
| NM_001168237      | 0.214540247 | 1.281087431 | 11917 | 85.74472395 |
| NM_001168238      | 0.212698245 | 1.286461409 | 11854 | 85.71832597 |
| ENST00000253320.4 | 0           | 1.806000822 | 7298  | 85.42833254 |
| NM_005036         | 0.147782001 | 1.116529008 | 10048 | 85.42608739 |
| TCONS_00029323    | 0.154548615 | 1.02029502  | 10100 | 84.96681266 |
| TCONS_00029322    | 0.153087807 | 1.010248756 | 10049 | 84.89845926 |
| NM_001136000      | 0.213290298 | 1.300919955 | 11630 | 84.84072348 |
| NM_177538         | 0.189632329 | 1.07328886  | 10942 | 84.76771222 |
| NM_001168239      | 0.211848982 | 1.30895574  | 11567 | 84.76563282 |
| NM_001001928      | 0.151505336 | 1.108278976 | 9964  | 84.69659963 |
| TCONS_00029324    | 0.152050283 | 1.039394547 | 9975  | 84.68891165 |
| NM_001100164      | 0.138546823 | 1.386172532 | 9632  | 84.54538651 |
| NR_033321         | 0.153894454 | 1.057904228 | 9981  | 84.53013633 |
| NM_001040653      | 0.248073798 | 1.563809524 | 12599 | 84.40015738 |
| NM_014721         | 0.138003096 | 1.398594061 | 9530  | 84.14961949 |
| NM_014331         | 0.147882114 | 1.299647595 | 9647  | 83.69428832 |
| NM_001204087      | 0.268976473 | 2.830386529 | 13064 | 83.55442215 |
| NM_000091         | 0.071874676 | 1.896381376 | 8096  | 83.51065158 |
| NM_153252         | 0.262600913 | 2.348784492 | 12792 | 83.40110815 |
| NM_001100165      | 0.139770437 | 1.423613329 | 9392  | 83.36685258 |
| NM_000138         | 0.229453187 | 2.084395041 | 11694 | 83.32600751 |
| NM_032410         | 0.308335383 | 3.263919668 | 14439 | 83.11207353 |
| NM_001100166      | 0.139229261 | 1.436766764 | 9290  | 82.96508303 |
| NM_002249         | 0.274246966 | 2.884178187 | 13019 | 82.8090254  |
| NM_032875         | 0.188539808 | 1.058568539 | 10380 | 82.67341856 |
| NR_027130         | 0.238359348 | 1.274976538 | 11720 | 82.4544164  |
| NM_024776         | 0.244329725 | 2.820089701 | 11816 | 82.1424364  |
| NM_001145909      | 0.051588788 | 1.004273504 | 7487  | 82.0636059  |
| NM_001039547      | 0.172899361 | 1.090779709 | 9836  | 82.02903759 |
| NM_014048         | 0.117441492 | 2.070998379 | 8633  | 82.00198713 |
| NM_001184906      | 0.192056022 | 1.022168206 | 10284 | 81.93364626 |
| NM_014611         | 0.379324787 | 5.901034483 | 17399 | 81.8703309  |
| NM_020245         | 0.224946411 | 2.020685313 | 11118 | 81.72314409 |
| NM_023073         | 0.227752288 | 1.607197071 | 11198 | 81.71971844 |
| NM_033394         | 0.057536224 | 1.035167177 | 7506  | 81.65239859 |
| NM_173076         | 0.145419397 | 1.023516484 | 9099  | 81.51731449 |

|                |              |             |       |             |
|----------------|--------------|-------------|-------|-------------|
| TCONS_00017341 | -0.040690269 | 21.45575439 | 6090  | 81.2138577  |
| NM_001001396   | 0.14313808   | 1.222982063 | 8919  | 80.92243165 |
| NM_015074      | 0.213448438  | 1.898024761 | 10580 | 80.90400698 |
| NM_015035      | 0.192397805  | 1.16064458  | 9990  | 80.71982926 |
| NM_032440      | 0.208270769  | 1.875096302 | 10383 | 80.67483886 |
| NM_020354      | 0.128342     | 1.225482174 | 8554  | 80.61776309 |
| NM_001170765   | 0.208943994  | 1.888556542 | 10363 | 80.52856892 |
| NM_014877      | 0.315298789  | 4.626030369 | 13829 | 80.51864994 |
| NM_024513      | 0.127952972  | 1.68102841  | 8517  | 80.47912207 |
| NM_015120      | 0.295584912  | 2.828741681 | 12921 | 80.07126924 |
| NM_001198783   | 0.324772878  | 3.457045163 | 14037 | 79.99945496 |
| NM_001684      | 0.144858264  | 1.253488904 | 8741  | 79.9500359  |
| NR_037163      | 0.324453274  | 3.460319736 | 13948 | 79.78318379 |
| NM_002697      | 0.323645032  | 3.470118662 | 13904 | 79.7525474  |
| NM_001198786   | 0.319233039  | 3.452828813 | 13715 | 79.72533932 |
| NM_170606      | 0.386858283  | 7.468271854 | 16861 | 79.61639879 |
| NM_018351      | 0.175330946  | 2.168066322 | 9287  | 79.47259983 |
| NM_024947      | 0.294469609  | 4.089488636 | 12671 | 79.41840701 |
| NM_017890      | 0.332170625  | 3.521914894 | 14099 | 79.29753242 |
| NM_001083602   | 0.116837022  | 1.262824494 | 8050  | 79.23896519 |
| NM_152564      | 0.331852148  | 3.551372549 | 14024 | 79.1240535  |
| NM_133631      | 0.085962414  | 1.11008807  | 7493  | 79.12102792 |
| NM_014598      | 0.115117776  | 1.399097518 | 7977  | 79.03241752 |
| NM_020964      | 0.299924199  | 2.644510947 | 12697 | 78.88521722 |
| NM_000264      | 0.115027736  | 1.287926476 | 7942  | 78.8668692  |
| NM_133263      | 0.235105353  | 2.354380352 | 10626 | 78.84724571 |
| NR_046216      | 0.216285211  | 1.006349836 | 10078 | 78.67653397 |
| NM_002830      | 0.262737203  | 1.372056239 | 11379 | 78.64558884 |
| NM_001145845   | 0.081397672  | 1.109018966 | 7328  | 78.63579327 |
| NM_007124      | 0.294773875  | 3.79824632  | 12430 | 78.62559707 |
| NR_040023      | 0.139403812  | 1.31921785  | 8335  | 78.5691799  |
| NM_001080534   | 0.129541052  | 3.839434889 | 8139  | 78.52967827 |
| NM_032270      | 0.074962306  | 2.095323991 | 7206  | 78.52474934 |
| NM_001083603   | 0.116752479  | 1.287450931 | 7896  | 78.4848797  |
| NM_001172699   | 0.236178568  | 2.328147235 | 10540 | 78.41734707 |
| NM_001172698   | 0.235119189  | 2.350903901 | 10509 | 78.4105431  |
| NM_001164766   | 0.307365344  | 2.51111459  | 12775 | 78.28610253 |
| NM_001083607   | 0.116712718  | 1.301650249 | 7816  | 78.08978958 |
| NM_001114132   | 0.17953474   | 1.450761758 | 9057  | 78.08226101 |
| NM_001142523   | 0.136906189  | 1.704157979 | 8152  | 77.92738229 |
| NM_017686      | 0.173240967  | 1.521797905 | 8876  | 77.89105664 |
| NM_007199      | 0.14768091   | 1.737164107 | 8335  | 77.81351214 |
| NM_003162      | 0.345380871  | 2.353579022 | 14109 | 77.75651877 |
| NM_006094      | 0            | 2.12772998  | 6043  | 77.7367352  |
| NM_004758      | 0.114070846  | 1.243180047 | 7697  | 77.72482213 |
| NM_001083606   | 0.116676131  | 1.316673124 | 7742  | 77.72246204 |
| NM_170782      | 0.291106321  | 3.104178879 | 11940 | 77.46103    |
| NM_001261835   | 0.11588755   | 1.243644896 | 7670  | 77.42927417 |
| NM_001127715   | 0.199516446  | 1.674828914 | 9351  | 77.40721495 |
| NM_144571      | 0.174537976  | 1.622469866 | 8793  | 77.40439753 |
| NM_001083604   | 0.11661629   | 1.327111343 | 7660  | 77.315002   |
| NM_001083605   | 0.116606153  | 1.330062794 | 7643  | 77.23004712 |
| NR_026718      | 0.093700935  | 1.245488359 | 7258  | 77.21114871 |
| NM_001170704   | 0.282246208  | 3.160163025 | 11531 | 77.07419223 |
| NM_016200      | 0.311438437  | 2.123242812 | 12519 | 77.04200836 |
| NM_145686      | 0.118756309  | 1.637743751 | 7640  | 77.02694973 |
| NM_139244      | 0.199539219  | 1.699264388 | 9243  | 76.95671747 |
| NM_001455      | 0.101961952  | 1.910502656 | 7340  | 76.93833209 |

|              |             |             |       |             |
|--------------|-------------|-------------|-------|-------------|
| NM_018388    | 0.284608162 | 3.185471944 | 11494 | 76.69721203 |
| NM_175625    | 0.214814704 | 1.320889262 | 9535  | 76.67124348 |
| NM_201559    | 0.103441109 | 1.918375718 | 7313  | 76.67020215 |
| NM_024418    | 0.115834457 | 1.241021548 | 7517  | 76.65771346 |
| NM_001267843 | 0.268838452 | 1.831800382 | 10980 | 76.61512491 |
| NM_001037165 | 0.275804323 | 3.684299884 | 11190 | 76.60744376 |
| NM_001161352 | 0.033580645 | 3.480962243 | 6276  | 76.56091001 |
| NM_022166    | 0.207696763 | 2.934340189 | 9335  | 76.55059866 |
| NM_001130048 | 0.124328221 | 1.423615656 | 7638  | 76.52990608 |
| NM_001197104 | 0.406139886 | 7.180004821 | 16593 | 76.49738931 |
| NM_019590    | 0.131569716 | 1.606009801 | 7753  | 76.4662605  |
| NM_005933    | 0.406522017 | 7.185287911 | 16584 | 76.42743014 |
| NM_133486    | 0.286417817 | 3.074319609 | 11463 | 76.39996223 |
| NM_175624    | 0.205949177 | 1.379258138 | 9246  | 76.35284864 |
| NM_001170701 | 0.282955129 | 3.196611366 | 11331 | 76.32739726 |
| NM_015657    | 0.151124861 | 1.021768707 | 8084  | 76.3232696  |
| NM_015335    | 0.212092263 | 3.851034336 | 9377  | 76.29697559 |
| NM_014971    | 0.118648785 | 1.104049343 | 7457  | 76.1081349  |
| NM_001170703 | 0.282932116 | 3.215623613 | 11264 | 76.10384386 |
| NM_001164271 | 0           | 2.175077774 | 5785  | 76.05918748 |
| NM_014818    | 0.230423211 | 2.328411771 | 9752  | 75.99741262 |
| NM_014643    | 0.181971244 | 2.025388361 | 8625  | 75.97104889 |
| NM_001242560 | 0.124740697 | 1.591603561 | 7526  | 75.93095161 |
| NM_002941    | 0.082012596 | 1.13349905  | 6838  | 75.91039837 |
| NM_001170702 | 0.285918119 | 3.170237252 | 11295 | 75.89114947 |
| NM_015296    | 0.126118522 | 1.464371178 | 7521  | 75.78623445 |
| NM_003417    | 0.313424768 | 1.497410178 | 12162 | 75.71651768 |
| NM_001620    | 0.448083394 | 9.026202498 | 18814 | 75.70316401 |
| NM_001113490 | 0.092061097 | 1.239164867 | 6944  | 75.65915403 |
| NM_001007561 | 0.231997691 | 1.768349334 | 9686  | 75.58485046 |
| NM_145287    | 0.086388714 | 1.017767988 | 6809  | 75.38815643 |
| NM_001168724 | 0.208318725 | 1.71655203  | 9013  | 75.15970354 |
| NM_181489    | 0.25763114  | 2.636452337 | 10248 | 75.1517857  |
| NM_000052    | 0.18487478  | 2.188619227 | 8487  | 75.09334181 |
| NM_001161353 | 0.048332842 | 3.449405718 | 6225  | 75.08527225 |
| NM_002673    | 0.123308652 | 1.09753762  | 7309  | 74.95070138 |
| NM_001193583 | 0.05941641  | 1.077020003 | 6348  | 74.9403741  |
| NM_175623    | 0.237172219 | 1.392175176 | 9635  | 74.87767669 |
| NM_001089    | 0.080127542 | 1.081081081 | 6622  | 74.85523949 |
| NM_014339    | 0.193933036 | 1.438531257 | 8605  | 74.773302   |
| NM_001193582 | 0.065800379 | 1.057602248 | 6405  | 74.76515775 |
| NM_021723    | 0.226348203 | 1.802978359 | 9333  | 74.74052971 |
| NM_001193584 | 0.059305164 | 1.088072232 | 6312  | 74.73641388 |
| NM_001146705 | 0           | 2.358537896 | 5580  | 74.69939759 |
| NM_020909    | 0.081224704 | 1.001513546 | 6606  | 74.67557822 |
| NM_002184    | 0.215510677 | 3.612368857 | 9054  | 74.64612749 |
| NM_022456    | 0.228350029 | 1.452123676 | 9346  | 74.59903895 |
| NM_175767    | 0.212979115 | 3.527307178 | 8971  | 74.54296886 |
| NM_017754    | 0.240854572 | 3.124675594 | 9632  | 74.5046224  |
| NM_021722    | 0.228270498 | 1.808439815 | 9312  | 74.47089732 |
| NM_001013620 | 0.258490172 | 2.297994838 | 10073 | 74.42114174 |
| NM_001007466 | 0.198661295 | 1.840682293 | 8617  | 74.38650708 |
| NM_002247    | 0.047994085 | 3.598066525 | 6102  | 74.3662271  |
| NM_004898    | 0.27340684  | 1.932964095 | 10471 | 74.35075531 |
| NM_004834    | 0.130844716 | 1.600109334 | 7316  | 74.34199706 |
| NM_014831    | 0.273983909 | 1.440671499 | 10483 | 74.33426286 |
| NM_014844    | 0.202401132 | 1.040179599 | 8685  | 74.33090836 |
| NM_005010    | 0.065121087 | 1.095381208 | 6321  | 74.32728326 |

|              |             |             |       |             |
|--------------|-------------|-------------|-------|-------------|
| NM_001079843 | 0.165550482 | 1.015252742 | 7932  | 74.31755635 |
| NM_018036    | 0.295697621 | 2.752500225 | 11098 | 74.1961748  |
| NM_006750    | 0.249414202 | 1.588885477 | 9770  | 74.19038499 |
| NM_001190981 | 0.213242901 | 3.519724977 | 8871  | 74.10149326 |
| NM_004653    | 0           | 2.44005102  | 5487  | 74.07428704 |
| NM_001130082 | 0.123552185 | 1.120397592 | 7142  | 74.06891544 |
| NM_012340    | 0.146972173 | 1.929700997 | 7524  | 73.9924814  |
| NM_001037132 | 0.068245268 | 1.008406027 | 6304  | 73.9792134  |
| NM_001184937 | 0.081204885 | 1.010963558 | 6475  | 73.93303995 |
| NM_000059    | 0.307174931 | 4.148691375 | 11385 | 73.92479198 |
| NM_001030055 | 0.246545316 | 1.795710121 | 9603  | 73.83471478 |
| NM_020791    | 0.328304629 | 5.214220677 | 12080 | 73.8254023  |
| NM_022918    | 0.22520667  | 1.801982379 | 9079  | 73.8252424  |
| NM_001173    | 0.246646425 | 1.793771482 | 9600  | 73.81327421 |
| NM_014631    | 0.303965453 | 3.198719659 | 11246 | 73.81248651 |
| NM_016351    | 0.231504333 | 1.836115326 | 9225  | 73.81159852 |
| NR_033149    | 0.224222949 | 1.771501216 | 9045  | 73.7804354  |
| NM_145687    | 0.124143903 | 1.714184898 | 7084  | 73.71774361 |
| NM_133265    | 0.08683226  | 1.219066626 | 6513  | 73.69552207 |
| NM_001042492 | 0.339209139 | 4.437344064 | 12424 | 73.65373065 |
| NM_001127510 | 0.292517249 | 3.195977118 | 10837 | 73.64959997 |
| NM_032242    | 0.226578379 | 2.134458416 | 9065  | 73.63769958 |
| NM_001099666 | 0.265799146 | 2.64819421  | 10050 | 73.60340671 |
| NR_033711    | 0.080718788 | 1.312997347 | 6408  | 73.58844664 |
| NM_001080495 | 0.284538792 | 3.06064333  | 10569 | 73.55344872 |
| NM_001166051 | 0.120657198 | 1.062348062 | 6992  | 73.52904457 |
| NM_001166052 | 0.120428237 | 1.066265922 | 6986  | 73.51662638 |
| NM_001136021 | 0.148177816 | 1.917282127 | 7446  | 73.50391349 |
| NM_001166053 | 0.120656352 | 1.063251288 | 6987  | 73.5028202  |
| NM_001002860 | 0.200514801 | 2.755208333 | 8447  | 73.47873569 |
| NM_001166054 | 0.120655504 | 1.064012602 | 6982  | 73.47658646 |
| NM_000267    | 0.339560113 | 4.451787737 | 12361 | 73.42772918 |
| NM_001127511 | 0.294573708 | 3.134024435 | 10803 | 73.32023201 |
| NM_000038    | 0.292527452 | 3.229263747 | 10729 | 73.2806335  |
| NM_173075    | 0.223540857 | 1.776779699 | 8905  | 73.2715823  |
| NM_173091    | 0.150709814 | 1.922952804 | 7436  | 73.23619898 |
| NM_005128    | 0.164224529 | 1.202239875 | 7678  | 73.23415501 |
| NM_001166050 | 0.226838166 | 1.761925992 | 8971  | 73.2303038  |
| NM_001242559 | 0.135002034 | 1.732486743 | 7165  | 73.21889727 |
| NM_194314    | 0.205369912 | 1.310243097 | 8473  | 73.14482557 |
| NM_015409    | 0.340930665 | 6.069497443 | 12316 | 73.14185074 |
| NM_004307    | 0.228413448 | 1.771142061 | 8974  | 73.09331898 |
| NM_025142    | 0.322463548 | 5.100197645 | 11636 | 73.08605528 |
| NM_001142885 | 0.232997265 | 1.799471133 | 9075  | 73.06682385 |
| NM_005338    | 0.185747714 | 1.184613469 | 8032  | 72.97445104 |
| NM_014548    | 0.23889277  | 1.897539199 | 9183  | 72.93536142 |
| NM_001146706 | 0           | 2.318036487 | 5316  | 72.91090453 |
| NM_001099270 | 0.101370735 | 1.307786073 | 6562  | 72.79451732 |
| NM_001258292 | 0.151988196 | 1.910313901 | 7358  | 72.7414224  |
| NM_001012981 | 0.138726058 | 1.302133034 | 7125  | 72.69988803 |
| NM_181552    | 0.380469567 | 2.573288718 | 13746 | 72.63581517 |
| NM_015473    | 0.181752629 | 1.360831315 | 7842  | 72.4599513  |
| NM_173822    | 0.250615222 | 2.332369013 | 9332  | 72.39227619 |
| NM_001024647 | 0.230380268 | 1.266319719 | 8838  | 72.35244175 |
| NM_206855    | 0.434920923 | 2.900623396 | 16361 | 72.27933521 |
| NM_014982    | 0.364895185 | 5.006734267 | 12918 | 72.18434919 |
| NM_000208    | 0.241641582 | 5.848548405 | 9058  | 72.17564445 |
| NM_004667    | 0.418267722 | 5.456975228 | 15339 | 72.04795949 |

|                   |             |             |       |             |
|-------------------|-------------|-------------|-------|-------------|
| NM_001130699      | 0.129955525 | 1.133566638 | 6857  | 72.04577675 |
| NM_001130700      | 0.128620332 | 1.141830449 | 6817  | 71.94557189 |
| NM_001109662      | 0.421240518 | 6.370355987 | 15449 | 71.93633464 |
| NM_001858         | 0.22995029  | 1.162063037 | 8724  | 71.9244567  |
| NM_203446         | 0.146660057 | 1.200450768 | 7098  | 71.89357367 |
| NM_001243198      | 0.190560592 | 1.166243655 | 7879  | 71.84886216 |
| NM_015553         | 0.130038934 | 1.139691856 | 6814  | 71.81263809 |
| NM_003895         | 0.146237922 | 1.21639576  | 7074  | 71.80743078 |
| NM_001160302      | 0.146109721 | 1.2066865   | 7058  | 71.73694807 |
| NM_001009944      | 0.39679572  | 4.549794879 | 14137 | 71.72045617 |
| NM_001202543      | 0.391253439 | 2.65808638  | 13868 | 71.68750038 |
| NM_000332         | 0.305538556 | 3.713896202 | 10635 | 71.61712559 |
| NM_000296         | 0.397748473 | 4.548638132 | 14134 | 71.5995764  |
| NR_033710         | 0.072337628 | 1.352901598 | 5944  | 71.52030233 |
| NM_021005         | 0           | 2.854598826 | 5109  | 71.47726911 |
| NM_001167741      | 0.194316444 | 1.835325534 | 7863  | 71.44282802 |
| NM_015048         | 0.211006232 | 3.08395363  | 8194  | 71.42028071 |
| NM_021946         | 0.154009723 | 1.072541041 | 7126  | 71.41480931 |
| NM_001164273      | 0.349516822 | 4.12099319  | 12041 | 71.37848866 |
| NM_001128164      | 0.306867736 | 3.715783508 | 10586 | 71.31519264 |
| NM_001160306      | 0.14502356  | 1.254825699 | 6941  | 71.23036495 |
| NM_001079817      | 0.25011559  | 6.181092763 | 9022  | 71.22717768 |
| NM_006654         | 0.140693899 | 1.246357809 | 6863  | 71.18768907 |
| NM_007250         | 0.034282282 | 1.039660579 | 5420  | 71.09676545 |
| NM_139321         | 0.236425969 | 1.993414211 | 8654  | 71.03290812 |
| NM_152405         | 0.256581797 | 1.634680688 | 9128  | 71.02659683 |
| NM_017757         | 0.206636284 | 1.968656344 | 8007  | 70.99164644 |
| NM_001166271      | 0.228558522 | 1.866382878 | 8456  | 70.9390671  |
| NM_001042555      | 0.143706628 | 1.259588741 | 6856  | 70.9019185  |
| NM_004022         | 0.172619272 | 1.239542172 | 7338  | 70.87519298 |
| NM_024963         | 0.219791606 | 2.227609673 | 8228  | 70.77139564 |
| NM_152424         | 0.230321516 | 1.145445932 | 8442  | 70.71833391 |
| NM_001010891      | 0.201631699 | 1.859910771 | 7844  | 70.70857378 |
| NM_133646         | 0.166545864 | 2.113044689 | 7182  | 70.63247207 |
| ENST00000338983.3 | 0.166314361 | 2.114500627 | 7178  | 70.63241368 |
| NM_004992         | 0.302229788 | 2.092080851 | 10240 | 70.60938087 |
| NM_001258296      | 0.157015282 | 1.984453002 | 7010  | 70.57952166 |
| NM_182557         | 0.197660333 | 1.70922719  | 7737  | 70.57397223 |
| NM_004285         | 0.261415268 | 3.41503017  | 9114  | 70.51066941 |
| NM_018489         | 0.350443381 | 5.192033294 | 11773 | 70.47913816 |
| NM_020746         | 0.350369304 | 5.277461558 | 11770 | 70.47819435 |
| NM_003922         | 0.428284014 | 7.808054221 | 15196 | 70.47660557 |
| NM_004013         | 0.181459779 | 1.261133603 | 7409  | 70.45629829 |
| NM_020825         | 0.195631768 | 2.218167601 | 7672  | 70.45457626 |
| NM_003033         | 0.156465874 | 2.275570219 | 6970  | 70.42373359 |
| NM_001142386      | 0.37804833  | 4.033179435 | 12778 | 70.30530233 |
| NM_001170766      | 0.20336092  | 1.983819186 | 7786  | 70.29408901 |
| NM_014916         | 0.257533307 | 2.402683063 | 8944  | 70.21709719 |
| NM_052947         | 0.178805153 | 1.005342466 | 7299  | 70.15811262 |
| NM_001258294      | 0.157509963 | 1.987884033 | 6932  | 70.14456896 |
| NM_016252         | 0.440533371 | 10.39077824 | 15701 | 70.10320012 |
| NM_180989         | 0.256669964 | 2.014084507 | 8874  | 70.02310975 |
| NM_001128159      | 0.388861233 | 2.95574546  | 13105 | 69.96137663 |
| NM_152756         | 0.284087871 | 3.366516312 | 9532  | 69.89590578 |
| NM_001258297      | 0.161164482 | 1.977899754 | 6922  | 69.78990525 |
| NM_007137         | 0.213030209 | 1.440895788 | 7858  | 69.76122111 |
| NM_004021         | 0.188716515 | 1.185822716 | 7377  | 69.68070354 |
| NM_022455         | 0.389485759 | 6.252792113 | 12982 | 69.56112565 |



|                   |              |             |       |             |
|-------------------|--------------|-------------|-------|-------------|
| NM_001256126      | 0.159589701  | 3.560502116 | 6850  | 69.55632878 |
| NM_001206491      | 0.354162922  | 5.220334598 | 11595 | 69.5437893  |
| NM_001242784      | 0.166998378  | 1.378541637 | 6952  | 69.45455432 |
| NM_020812         | 0.131934026  | 2.04078125  | 6399  | 69.43985229 |
| NM_001098500      | 0.113292176  | 1.503021395 | 6122  | 69.37886701 |
| NM_022068         | 0.296108457  | 7.949655101 | 9712  | 69.36814555 |
| NM_001258295      | 0.161691792  | 1.981300219 | 6844  | 69.35195668 |
| NM_001029884      | 0.184864666  | 1.03343927  | 7236  | 69.33922737 |
| NM_012294         | 0.148151929  | 1.171549381 | 6621  | 69.31447499 |
| NM_003874         | 0.235984677  | 2.964876033 | 8227  | 69.29833774 |
| NM_198468         | 0.254859956  | 2.576535925 | 8642  | 69.26997552 |
| NM_001184879      | 0.238696983  | 2.923662278 | 8278  | 69.26602448 |
| NR_037921         | 0.357029162  | 5.240041386 | 11597 | 69.24112327 |
| NM_205843         | 0.229228014  | 3.298710957 | 8067  | 69.22802634 |
| NM_015245         | 0.131432196  | 1.39001732  | 6350  | 69.21346467 |
| NM_203463         | 0.162705119  | 3.634539329 | 6826  | 69.17697672 |
| NM_206854         | 0.44335862   | 3.020110282 | 15414 | 69.10877025 |
| NM_001122665      | -0.013368004 | 4.053786575 | 4647  | 69.08019012 |
| NM_173344         | 0.161973516  | 2.26536643  | 6767  | 68.93754794 |
| NM_019001         | 0.313967013  | 4.043400713 | 10091 | 68.91473677 |
| NM_001245002      | 0.23181924   | 3.32616532  | 8044  | 68.8968643  |
| NM_001080541      | 0.355205333  | 4.160665791 | 11414 | 68.88749162 |
| NR_024368         | 0.320196154  | 3.145474033 | 10262 | 68.86516973 |
| NM_000351         | 0.138239463  | 2.730594323 | 6376  | 68.81145745 |
| NM_001243476      | 0.128669317  | 1.901331622 | 6232  | 68.78547328 |
| ENST00000568686.1 | 0.034780216  | 1.034142491 | 5066  | 68.70032752 |
| NM_032199         | 0.229412729  | 3.538723083 | 7940  | 68.66447159 |
| NM_014830         | 0.130692021  | 1.004969542 | 6237  | 68.65331904 |
| NM_001042604      | 0.315746179  | 4.072814085 | 10052 | 68.60305737 |
| NM_172071         | 0.345973501  | 4.605856675 | 10995 | 68.57928641 |
| NM_001031701      | 0.192688178  | 1.435542002 | 7213  | 68.56449446 |
| NM_022740         | 0.444345282  | 10.21622332 | 15224 | 68.55977662 |
| NM_001204         | 0.3760059    | 4.605468103 | 12069 | 68.55136819 |
| NM_001245005      | 0.230728479  | 3.338514026 | 7913  | 68.43058264 |
| NM_001100829      | 0.251731951  | 1.8056685   | 8361  | 68.42051089 |
| NM_004020         | 0.186857264  | 1.203813559 | 7079  | 68.41522235 |
| NM_014363         | 0.452979138  | 8.87435258  | 15638 | 68.40604689 |
| NM_001145354      | 0.355211263  | 3.543936028 | 11254 | 68.40233046 |
| NM_144993         | 0.347877319  | 4.555727554 | 10981 | 68.33610972 |
| NM_032116         | 0.213711687  | 1.29706116  | 7553  | 68.33474262 |
| NM_001184881      | 0.242357763  | 2.907749077 | 8129  | 68.30975681 |
| NM_198236         | 0.177238862  | 1.55247496  | 6888  | 68.28421789 |
| NM_005597         | 0.227126705  | 3.267905189 | 7804  | 68.2758211  |
| NM_005633         | 0.251653719  | 3.598701611 | 8317  | 68.24737561 |
| NM_002662         | 0.120690506  | 1.389543568 | 6024  | 68.24710661 |
| ENST00000560295.1 | 0.294470307  | 4.276053927 | 9345  | 68.20323099 |
| NM_001014380      | 0.213209062  | 1.285543131 | 7511  | 68.18804357 |
| TCONS_00023422    | 0.235747805  | 2.001005278 | 7957  | 68.17283795 |
| NR_045128         | 0            | 1.55292599  | 4647  | 68.16890787 |
| NM_080616         | 0.128015605  | 1.274827925 | 6101  | 68.10974044 |
| NM_001245004      | 0.233294067  | 3.3647193   | 7890  | 68.10316974 |
| NM_182762         | 0.288655491  | 4.803996506 | 9157  | 68.07013166 |
| NM_001257273      | 0.30352528   | 2.498532802 | 9541  | 68.03028732 |
| NM_001113239      | 0.447269971  | 10.25528262 | 15143 | 68.01724246 |
| NM_001023563      | 0.32415706   | 1.266047798 | 10125 | 68.00538401 |
| NM_001202513      | 0.092747985  | 1.223231783 | 5612  | 67.96522712 |
| NM_183416         | 0.224140638  | 1.548408142 | 7663  | 67.91761361 |
| NM_013255         | 0.358174296  | 3.628453903 | 11182 | 67.86984379 |

|                   |              |             |       |             |
|-------------------|--------------|-------------|-------|-------------|
| NM_004660         | -0.013191381 | 4.236631016 | 4487  | 67.86869856 |
| NM_001160147      | 0.402854342  | 4.870212436 | 12897 | 67.8148224  |
| NM_002357         | 0.095040205  | 1.230235043 | 5615  | 67.81162716 |
| NM_001168272      | 0.328566984  | 5.740021575 | 10196 | 67.79811293 |
| NM_001134408      | 0.01473345   | 1.482787751 | 4734  | 67.79034833 |
| NM_001184882      | 0.236807869  | 2.772381435 | 7885  | 67.76957043 |
| NM_001099220      | 0.184177941  | 1.133101348 | 6896  | 67.7476243  |
| NM_003724         | 0.290596669  | 2.943176832 | 9115  | 67.72851595 |
| NM_001098501      | 0.114660708  | 1.636876282 | 5851  | 67.72122233 |
| NM_001918         | 0.34892484   | 2.120758206 | 10814 | 67.70555599 |
| NM_001145078      | 0.323022859  | 1.248524852 | 9998  | 67.69094401 |
| NM_001962         | 0.073235492  | 2.098219306 | 5334  | 67.68554014 |
| NM_001174116      | 0.342803435  | 4.820360411 | 10598 | 67.65614411 |
| ENST00000438002.1 | -0.347924475 | 2.471031746 | 2519  | 67.65184464 |
| NM_001202514      | 0.094779277  | 1.214285714 | 5585  | 67.64973133 |
| NM_015207         | 0.161846566  | 1.195118207 | 6513  | 67.64163052 |
| NM_030637         | 0.404055461  | 4.902384096 | 12876 | 67.62329504 |
| NM_015263         | 0.343133601  | 4.815873915 | 10595 | 67.61258296 |
| NM_025134         | 0.36864122   | 6.233728843 | 11461 | 67.59078353 |
| NM_002855         | 0.08690985   | 1.902189781 | 5479  | 67.58717711 |
| NM_001160148      | 0.406422679  | 4.906797315 | 12960 | 67.57402687 |
| NM_014784         | 0.178729617  | 1.514108436 | 6768  | 67.56415297 |
| NM_001130081      | 0.12114774   | 1.372864152 | 5910  | 67.5631072  |
| NM_024646         | 0.251196788  | 2.345124048 | 8141  | 67.56263448 |
| NM_172349         | 0.388872505  | 6.357845548 | 12197 | 67.49293826 |
| NM_003747         | 0.311299135  | 3.255130743 | 9598  | 67.47159883 |
| NM_033502         | 0.225566618  | 4.029815303 | 7579  | 67.42019722 |
| NM_001076786      | 0.299944845  | 3.46714856  | 9268  | 67.39462651 |
| NM_001164715      | 0.143402624  | 1.090056589 | 6184  | 67.3614582  |
| NM_178006         | 0.125206857  | 2.011137361 | 5925  | 67.33634625 |
| NM_018012         | 0.211350059  | 1.464800329 | 7286  | 67.31763634 |
| NM_001099952      | 0.330085214  | 5.883937413 | 10097 | 67.31560312 |
| NM_183238         | 0.14520135   | 1.067355839 | 6190  | 67.25261136 |
| NM_002222         | 0.329617756  | 5.862827017 | 10052 | 67.21229773 |
| NM_014825         | 0.353553538  | 4.548019985 | 10807 | 67.20245502 |
| NM_173511         | 0.115652071  | 1.695998614 | 5772  | 67.18716627 |
| NM_014155         | 0.305278724  | 2.86745182  | 9339  | 67.13682315 |
| NM_001039580      | 0.215857846  | 1.250034102 | 7330  | 67.13465916 |
| NM_198450         | 0.165840527  | 1.984691511 | 6466  | 67.07596607 |
| NM_015071         | 0.295084456  | 4.078531136 | 9040  | 67.02260484 |
| NM_001025108      | 0.256462109  | 2.922536946 | 8119  | 66.99684879 |
| NM_018963         | 0.286833661  | 2.106972519 | 8805  | 66.91993593 |
| NM_052851         | 0.129758877  | 2.09824322  | 5862  | 66.62887938 |
| NM_145290         | 0.013249788  | 1.005482456 | 4559  | 66.62573676 |
| NM_002285         | 0.262056562  | 2.953791324 | 8136  | 66.56233452 |
| NM_006139         | 0.047911678  | 1.739869014 | 4885  | 66.5440949  |
| NM_198484         | 0.267130641  | 2.434904056 | 8233  | 66.49754656 |
| NM_020673         | 0.285250634  | 2.461565137 | 8650  | 66.47553367 |
| NM_178007         | 0.129562347  | 2.023487056 | 5832  | 66.47317562 |
| NM_020765         | 0.472940441  | 12.28031734 | 15881 | 66.41996119 |
| NM_004441         | 0.030789501  | 1.37368984  | 4674  | 66.26168324 |
| NM_012296         | 0.149024081  | 1.501898003 | 6058  | 66.23414053 |
| NM_000368         | 0.287167636  | 3.075324977 | 8615  | 66.1629789  |
| NM_006734         | 0.32904773   | 4.750719868 | 9723  | 66.15943221 |
| NM_001162426      | 0.288099545  | 3.068384999 | 8612  | 66.06497595 |
| NM_020726         | 0.290336866  | 2.711003348 | 8660  | 66.04062743 |
| NM_006546         | 0.294870402  | 2.544075721 | 8768  | 66.02664276 |
| NM_001137675      | 0.256107123  | 2.816658202 | 7875  | 66.01394417 |

|              |              |             |       |             |
|--------------|--------------|-------------|-------|-------------|
| NM_201380    | 0.465416682  | 5.414584563 | 15248 | 66.01184083 |
| NM_015833    | 0.213004453  | 3.005976946 | 7026  | 65.96694131 |
| NM_001037335 | 0.340443937  | 3.602879424 | 10001 | 65.95890403 |
| NM_018080    | 0.45181627   | 7.516624041 | 14466 | 65.93262579 |
| NM_001178141 | 0.317087324  | 3.587173703 | 9308  | 65.8860333  |
| NM_002850    | 0.231367668  | 6.253981217 | 7346  | 65.87856204 |
| NM_001111283 | 0.232581222  | 1.382360923 | 7369  | 65.87743789 |
| NM_001105251 | 0.224883597  | 2.024501661 | 7223  | 65.87577465 |
| NM_001018088 | 0.454896082  | 7.416758016 | 14595 | 65.85387776 |
| NM_001039840 | 0.207842083  | 1.20552902  | 6908  | 65.83971339 |
| NR_033708    | -0.03119806  | 1.284768212 | 4076  | 65.83535397 |
| NM_002645    | 0.277019172  | 3.729488417 | 8287  | 65.81508558 |
| NM_001098638 | 0.255888754  | 3.191358814 | 7822  | 65.81073999 |
| NM_018999    | 0.249347646  | 1.838066701 | 7675  | 65.76245885 |
| NM_020343    | 0.322696888  | 4.036388712 | 9425  | 65.75423823 |
| NM_004023    | 0.216811054  | 1.221906924 | 7047  | 65.74590155 |
| NM_001178142 | 0.312955488  | 3.498853336 | 9156  | 65.74122115 |
| NM_197941    | 0.22891596   | 1.132085856 | 7267  | 65.73237045 |
| NM_030797    | 0.041432982  | 1.548627368 | 4698  | 65.70206022 |
| NM_014810    | 0.433731235  | 6.198944709 | 13455 | 65.68473585 |
| NM_020919    | 0.210237733  | 1.352703093 | 6917  | 65.68334603 |
| NM_018373    | 0.218247083  | 2.183002833 | 7059  | 65.68120342 |
| NM_020923    | 0.348367524  | 3.948058348 | 10145 | 65.63398086 |
| NM_001162427 | 0.286629998  | 3.021978022 | 8462  | 65.62228572 |
| NM_001135608 | 0.303870077  | 4.178571429 | 8875  | 65.58046369 |
| NM_001244638 | 0.217593801  | 3.670035587 | 7024  | 65.57292158 |
| NM_005093    | 0.254704336  | 1.932661238 | 7736  | 65.5521326  |
| NM_000618    | 0.234673017  | 1.398579429 | 7320  | 65.47907961 |
| NM_014733    | 0.222708844  | 2.071730552 | 7095  | 65.47265108 |
| NM_080491    | 0.162808609  | 1.584464432 | 6114  | 65.46172886 |
| NM_015711    | 0.136072108  | 1.15856421  | 5738  | 65.4421814  |
| NM_033141    | 0.125522185  | 1.245892857 | 5599  | 65.43408445 |
| NM_206853    | 0.449681183  | 3.236700623 | 14135 | 65.42779276 |
| NM_022048    | 0.275911358  | 4.09506309  | 8162  | 65.41691064 |
| NM_198576    | 0.235893777  | 3.387250887 | 7325  | 65.39695856 |
| NM_002655    | 0.236579595  | 1.894385391 | 7337  | 65.3917595  |
| NM_001142397 | 0.142816873  | 1.068752149 | 5817  | 65.37672266 |
| NM_145207    | 0.275589633  | 1.468058968 | 8139  | 65.35370011 |
| NM_052916    | 0.065634124  | 1.280924146 | 4890  | 65.3388368  |
| NM_080927    | 0.163165001  | 1.710651567 | 6092  | 65.31603045 |
| NM_015559    | 0.343488814  | 3.066875442 | 9898  | 65.31543976 |
| NM_002912    | 0.3686282    | 5.038220727 | 10700 | 65.30960686 |
| NM_001098414 | 0.269867007  | 2.443110778 | 7997  | 65.29283439 |
| NM_001083621 | 0.311910105  | 3.149577402 | 8991  | 65.24529198 |
| NM_201384    | 0.463845885  | 5.601878759 | 14796 | 65.21714836 |
| NM_014644    | 0.286843854  | 1.024632309 | 8362  | 65.21383063 |
| NM_005435    | 0.119706251  | 2.328170554 | 5487  | 65.20713184 |
| NM_020719    | 0.21748933   | 3.085409765 | 6942  | 65.19774469 |
| NM_016513    | 0.174631898  | 1.505450465 | 6237  | 65.18318134 |
| NM_001543    | 0.272590164  | 4.673349938 | 8029  | 65.17933097 |
| NM_198253    | -0.028384106 | 1.311736855 | 4012  | 65.13820969 |
| NM_130854    | 0.234088375  | 6.533388635 | 7232  | 65.13401803 |
| NM_003647    | 0.261078571  | 3.210607621 | 7767  | 65.12157779 |
| NM_032043    | 0.279314979  | 3.028410482 | 8165  | 65.12137925 |
| NM_000445    | 0.465257479  | 5.617380727 | 14797 | 65.04764176 |
| NR_033709    | 0.050127891  | 1.409168443 | 4689  | 65.04370208 |
| NM_000112    | 0.276303883  | 1.49374613  | 8074  | 65.02803266 |
| NM_001142495 | 0.410126985  | 4.154561924 | 12143 | 65.00122273 |

|              |              |             |       |             |
|--------------|--------------|-------------|-------|-------------|
| NM_024490    | 0.101626011  | 1.503056935 | 5233  | 64.98790494 |
| NM_173214    | 0.436854712  | 7.329701706 | 13308 | 64.96461231 |
| NM_014772    | 0.14236404   | 1.087661206 | 5737  | 64.95990893 |
| NM_152641    | 0.29399614   | 3.60205528  | 8465  | 64.95619198 |
| NM_001113178 | 0.436707342  | 7.307189051 | 13297 | 64.95475139 |
| NM_001197026 | 0.266238833  | 1.963378844 | 7836  | 64.95340722 |
| NM_006599    | 0.435709699  | 7.353136559 | 13246 | 64.94488631 |
| NM_001112    | 0.218683279  | 3.023309686 | 6906  | 64.92925289 |
| NM_144775    | 0.28779366   | 4.834175692 | 8309  | 64.92025472 |
| NM_201379    | 0.465459276  | 5.592705579 | 14750 | 64.9197454  |
| NM_005955    | 0.272876882  | 2.239713999 | 7971  | 64.91788427 |
| NM_138714    | 0.438551503  | 7.296639976 | 13362 | 64.90014348 |
| NM_015375    | 0.270264665  | 1.182071058 | 7908  | 64.89312768 |
| NM_138713    | 0.437330864  | 7.31764529  | 13300 | 64.89017034 |
| NM_015077    | 0.224669304  | 2.116016574 | 6998  | 64.8595524  |
| NM_001135597 | 0.345411391  | 4.105879955 | 9812  | 64.84062817 |
| NM_001114634 | 0.237951009  | 1.919258952 | 7232  | 64.80553512 |
| NM_201382    | 0.465931131  | 5.60298913  | 14719 | 64.79424237 |
| NM_015548    | 0.497720771  | 11.41767816 | 16641 | 64.79402059 |
| NM_001243078 | 0.037219606  | 1.669242658 | 4528  | 64.78589265 |
| NM_201378    | 0.465348181  | 5.625485255 | 14682 | 64.78338832 |
| NR_033942    | 0.000987593  | 1.735727878 | 4203  | 64.76652218 |
| NM_015020    | 0.272162976  | 2.731279202 | 7918  | 64.76522702 |
| NM_201383    | 0.465728332  | 5.617128463 | 14688 | 64.7505522  |
| NM_025054    | 0.284143809  | 3.22553816  | 8175  | 64.72464331 |
| NM_001134223 | 0.278266969  | 1.76035319  | 8040  | 64.71494791 |
| NM_001304    | 0.319480565  | 4.04788234  | 9042  | 64.71020624 |
| NM_014920    | 0.173294544  | 1.537783581 | 6126  | 64.70521728 |
| NM_001001419 | 0.231779304  | 1.960676533 | 7094  | 64.70406937 |
| NM_001198834 | 0.290650573  | 1.022112727 | 8320  | 64.70262274 |
| NM_001242785 | 0.172479446  | 1.521106021 | 6111  | 64.68966935 |
| NM_015102    | 0.0854763    | 1.15567546  | 5003  | 64.68598807 |
| NM_000259    | 0.415266207  | 4.162535787 | 12224 | 64.64945442 |
| NM_201381    | 0.465783645  | 5.633005599 | 14645 | 64.64900842 |
| NM_015316    | 0.082088528  | 1.013914096 | 4958  | 64.63296193 |
| NM_022763    | 0.228285573  | 3.863986313 | 7013  | 64.62618791 |
| NM_015026    | 0.365852414  | 4.154831872 | 10378 | 64.60218044 |
| NM_001160423 | 0.293252358  | 2.417983716 | 8351  | 64.58528944 |
| NM_022832    | 0.276291312  | 1.842686755 | 7964  | 64.5846651  |
| NM_001003674 | 0.317249194  | 1.505253745 | 8945  | 64.57321261 |
| NM_001111284 | 0.239394703  | 1.39422543  | 7203  | 64.55294388 |
| NM_004447    | -0.010395958 | 1.627143557 | 4081  | 64.54682694 |
| NM_025099    | 0.23242639   | 3.110152715 | 7071  | 64.54468018 |
| NM_003298    | 0.292800337  | 4.277430972 | 8329  | 64.54141402 |
| NM_014247    | 0.219145783  | 1.88797654  | 6819  | 64.48078338 |
| NM_004536    | 0.203288645  | 1.397191269 | 6550  | 64.47949939 |
| NM_014423    | 0.341190848  | 4.098851775 | 9579  | 64.4792104  |
| NM_005903    | 0.230201644  | 2.003708458 | 7010  | 64.4519391  |
| NM_001174064 | 0.165806182  | 1.5101459   | 5962  | 64.41143175 |
| NM_001243077 | 0.049691247  | 1.695973885 | 4594  | 64.41102713 |
| NM_001142649 | 0.210590459  | 2.094472815 | 6657  | 64.40827229 |
| NM_005751    | 0.423062166  | 5.825964856 | 12462 | 64.40549063 |
| NM_138959    | 0.30913357   | 1.903348291 | 8690  | 64.40268568 |
| NM_018084    | 0.347316635  | 4.095766543 | 9731  | 64.38449305 |
| NM_001172411 | 0.30917779   | 1.895336788 | 8684  | 64.37632771 |
| NM_001257194 | 0.229498085  | 1.579573127 | 6980  | 64.37265682 |
| NM_001135095 | 0.227315053  | 3.854343755 | 6940  | 64.36980403 |
| NM_000411    | 0.170952804  | 1.564213324 | 6018  | 64.31397409 |

|                   |              |             |       |             |
|-------------------|--------------|-------------|-------|-------------|
| NM_007110         | 0.378594019  | 4.785954741 | 10693 | 64.25770533 |
| NM_001039709      | 0.255475153  | 2.002684924 | 7448  | 64.25383154 |
| NM_213599         | 0.21283913   | 2.092628734 | 6660  | 64.23927213 |
| NM_001199107      | 0.209071889  | 1.075208491 | 6594  | 64.22608986 |
| NM_199462         | 0.271560217  | 1.190635452 | 7773  | 64.22261572 |
| NM_001195214      | 0.181379361  | 1.288152121 | 6152  | 64.20825293 |
| NM_001029880      | 0.283180062  | 4.6416999   | 8023  | 64.20642257 |
| NM_006933         | 0.403239697  | 6.575328265 | 11575 | 64.20375449 |
| NM_054027         | 0.291375891  | 1.66796637  | 8206  | 64.19211427 |
| NM_001040284      | 0.287516119  | 2.952169625 | 8111  | 64.16707522 |
| NM_001254943      | 0.344768434  | 3.996976332 | 9590  | 64.16587413 |
| NM_015850         | 0.164283397  | 1.549109415 | 5894  | 64.15996168 |
| NM_147185         | 0.424805929  | 5.821609454 | 12438 | 64.14896844 |
| NM_023110         | 0.165106714  | 1.538383325 | 5900  | 64.12937012 |
| NM_006901         | 0.312562969  | 3.252701771 | 8697  | 64.10880151 |
| NM_018429         | 0.391009611  | 5.325327314 | 11074 | 64.08593102 |
| NM_001172412      | 0.310404364  | 1.902605675 | 8634  | 64.07675745 |
| NM_020705         | 0.210197011  | 1.090466778 | 6576  | 64.04713025 |
| NM_001174063      | 0.165766528  | 1.530619169 | 5894  | 64.04609815 |
| NM_001082968      | 0.160597378  | 1.370523416 | 5807  | 63.96556415 |
| NM_001198832      | 0.291307672  | 1.041031941 | 8139  | 63.9356751  |
| NM_001001420      | 0.232455519  | 1.996828143 | 6935  | 63.91853112 |
| NM_001244580      | 0.432309162  | 9.754200521 | 12676 | 63.91503045 |
| NM_003496         | 0.430543208  | 9.791898332 | 12589 | 63.8934581  |
| NM_144973         | 0.340720057  | 4.601639868 | 9390  | 63.88555318 |
| NM_001079802      | 0.260321531  | 2.376743562 | 7455  | 63.86557124 |
| NM_001256071      | 0.559935643  | 16.62174099 | 21056 | 63.85635581 |
| NM_080627         | 0.28797073   | 2.532229965 | 8035  | 63.82499469 |
| NM_001018039      | 0.283174797  | 4.699949508 | 7921  | 63.79744309 |
| NM_017415         | 0.227352905  | 1.656185718 | 6805  | 63.7375317  |
| NM_006609         | 0.388753176  | 4.410763569 | 10869 | 63.72522971 |
| NM_000663         | 0.147601738  | 1.298782671 | 5585  | 63.70215791 |
| NR_033361         | 0.151397468  | 1.606819393 | 5630  | 63.67347036 |
| NM_001193376      | -0.028983902 | 1.233525105 | 3823  | 63.62249989 |
| NM_052920         | 0.107630418  | 2.073957514 | 5083  | 63.62163313 |
| ENST00000566551.1 | 0.138046355  | 1.071087436 | 5443  | 63.59208693 |
| NM_001130026      | 0.090657184  | 1.024769703 | 4884  | 63.54998728 |
| NM_181481         | 0.318211017  | 1.42804513  | 8685  | 63.53819752 |
| NM_148977         | 0.2392249    | 1.023365826 | 6975  | 63.53724736 |
| NM_001542         | 0.253973642  | 2.470288157 | 7252  | 63.53061645 |
| NM_032221         | 0.376734693  | 5.002791414 | 10388 | 63.52415896 |
| NR_046431         | 0.235417419  | 2.982903506 | 6901  | 63.51560118 |
| NM_014870         | 0.319185589  | 3.307444853 | 8703  | 63.51308846 |
| NM_032227         | 0.149288373  | 2.219030521 | 5569  | 63.48497861 |
| NM_001003675      | 0.327064475  | 1.464012596 | 8891  | 63.45250334 |
| NM_001134456      | 0.327908836  | 1.621451812 | 8912  | 63.44768412 |
| NM_001136499      | -0.018710288 | 1.963364293 | 3875  | 63.41420402 |
| NM_001042475      | 0.274473034  | 2.162717633 | 7638  | 63.40790227 |
| NM_173064         | 0.052366568  | 1.752680965 | 4475  | 63.39235612 |
| NM_005188         | 0.401945291  | 6.307630665 | 11230 | 63.37687079 |
| NM_033395         | 0.293426609  | 3.934361014 | 8043  | 63.36746193 |
| NM_001178140      | 0.345580068  | 3.81975256  | 9375  | 63.36393743 |
| NM_024627         | 0.222081593  | 2.006028636 | 6634  | 63.36096476 |
| NM_001032999      | 0.259351081  | 2.049050417 | 7318  | 63.35904112 |
| NM_006731         | 0.262200902  | 2.367599131 | 7363  | 63.30900972 |
| NM_173566         | 0.391843156  | 5.685722202 | 10827 | 63.28046576 |
| NM_018177         | 0.356579408  | 4.081522864 | 9665  | 63.25514926 |
| NM_001257195      | 0.218880997  | 1.660973006 | 6556  | 63.24652603 |

|                |             |             |       |             |
|----------------|-------------|-------------|-------|-------------|
| NM_015113      | 0.407600043 | 5.801491882 | 11394 | 63.23435979 |
| NM_001033551   | 0.159373641 | 1.299575822 | 5657  | 63.22605626 |
| NM_001007237   | 0.254789335 | 2.509662172 | 7192  | 63.19808243 |
| NM_015147      | 0.175002961 | 2.124360287 | 5861  | 63.15943703 |
| NM_003307      | 0.176207085 | 1.627808033 | 5875  | 63.14253125 |
| NM_170743      | 0.065197492 | 1.888669735 | 4562  | 63.13897242 |
| NM_015570      | 0.21182245  | 4.678354371 | 6416  | 63.13297256 |
| NR_038255      | 0.152909314 | 1.531053105 | 5554  | 63.12957193 |
| NM_001173977   | 0.142025039 | 1.405135784 | 5412  | 63.11804051 |
| NM_001017536   | 0.111297059 | 1.45479778  | 5043  | 63.11042452 |
| NM_014388      | 0.31503827  | 2.09934009  | 8485  | 63.09460571 |
| NM_033389      | 0.341051118 | 5.822714379 | 9165  | 63.08381659 |
| NM_198839      | 0.389164425 | 5.590452968 | 10662 | 63.07302513 |
| NR_038257      | 0.177720901 | 1.615750978 | 5878  | 63.04258932 |
| NM_023929      | 0.185986206 | 1.090666221 | 5988  | 62.99015256 |
| NM_012330      | 0.316878318 | 4.530415343 | 8498  | 62.97329726 |
| NM_001178138   | 0.367795165 | 3.951401492 | 9917  | 62.95757177 |
| NM_001145157   | 0           | 2.697122665 | 3961  | 62.93647591 |
| NM_001144936   | 0.157761308 | 1.199390899 | 5581  | 62.92036021 |
| NM_001128224   | 0.150534404 | 1.779803135 | 5485  | 62.91208959 |
| NM_015565      | 0.285660001 | 3.916322847 | 7755  | 62.90655035 |
| NM_173065      | 0.055055273 | 1.819043321 | 4431  | 62.90096103 |
| NM_145803      | 0.29813031  | 1.340356564 | 8020  | 62.85555595 |
| NM_023106      | 0.162354985 | 1.589374556 | 5627  | 62.83454376 |
| NM_020779      | 0.244374318 | 1.863984952 | 6910  | 62.81245008 |
| NM_023105      | 0.163195733 | 1.577919773 | 5633  | 62.8049337  |
| NM_153023      | 0.232409223 | 2.31854176  | 6692  | 62.79249124 |
| NM_022894      | 0.269360044 | 1.923503926 | 7385  | 62.78829184 |
| NM_004620      | 0.294825462 | 1.369576186 | 7927  | 62.7842993  |
| NM_015254      | 0.330081457 | 3.125598905 | 8765  | 62.71883157 |
| NM_006154      | 0.173527606 | 1.276484891 | 5757  | 62.70850781 |
| NM_020786      | 0.252338726 | 2.173684211 | 7029  | 62.68327201 |
| NM_001006657   | 0.248144893 | 1.83266129  | 6943  | 62.64807586 |
| NM_022098      | 0.299944864 | 2.627544013 | 8008  | 62.6461345  |
| NM_001178139   | 0.369877665 | 4.001518219 | 9879  | 62.62984928 |
| NM_005957      | 0.259308475 | 2.768951049 | 7149  | 62.62677152 |
| NM_001040285   | 0.298536525 | 2.921214402 | 7970  | 62.62305108 |
| NM_001105539   | 0.196243811 | 1.110047847 | 6060  | 62.56920576 |
| NM_004999      | 0.327740977 | 4.187601016 | 8661  | 62.56344568 |
| NM_001347      | 0.081799517 | 1.046521645 | 4642  | 62.55904137 |
| NM_001204056   | 0.412559256 | 6.05528613  | 11340 | 62.55623361 |
| TCONS_00010322 | 0.090418511 | 1.086064707 | 4728  | 62.54323592 |
| NM_018566      | 0.210189275 | 2.03575419  | 6264  | 62.50991398 |
| NM_015346      | 0.36458763  | 4.437209302 | 9674  | 62.49693322 |
| NM_001440      | 0.204598208 | 2.222780298 | 6171  | 62.48335463 |
| NM_017514      | 0.239352032 | 2.824933294 | 6745  | 62.4704575  |
| NM_004736      | 0.322248041 | 3.069326742 | 8495  | 62.46726231 |
| NM_052905      | 0.163448134 | 2.054170404 | 5574  | 62.45631467 |
| NM_001935      | 0           | 1.207692308 | 3899  | 62.44197306 |
| NM_014686      | 0.23624263  | 2.037109083 | 6682  | 62.43220156 |
| NM_001199775   | 0.319007383 | 4.171088638 | 8404  | 62.42886306 |
| NM_001042544   | 0.129616316 | 1.001360809 | 5143  | 62.4193157  |
| NM_007345      | 0.307607679 | 2.555582913 | 8122  | 62.39987724 |
| NM_001017969   | 0.264891467 | 2.687812326 | 7203  | 62.38902106 |
| NM_145294      | 0.16195937  | 1.799675149 | 5540  | 62.37634986 |
| NM_181482      | 0.328691384 | 1.385078777 | 8631  | 62.36670213 |
| NM_001005851   | 0.330073433 | 2.748961219 | 8663  | 62.35357494 |
| NM_000110      | 0.065391716 | 1.377782775 | 4446  | 62.31812171 |

|              |             |             |       |             |
|--------------|-------------|-------------|-------|-------------|
| NM_001114635 | 0.24859421  | 2.012801862 | 6873  | 62.2942138  |
| NM_015208    | 0.414330477 | 6.090523338 | 11311 | 62.28781928 |
| NM_018416    | 0.158771232 | 1.951295148 | 5481  | 62.27934221 |
| NM_033305    | 0.413261323 | 6.683448766 | 11261 | 62.26345224 |
| NM_001135669 | 0.316807156 | 2.965184917 | 8300  | 62.24183025 |
| NM_012214    | 0.320607301 | 2.024576473 | 8381  | 62.19690813 |
| NM_001145155 | 0           | 2.777461876 | 3868  | 62.19324722 |
| NM_152279    | 0.210740587 | 1.444766506 | 6209  | 62.1914382  |
| NM_030918    | 0.261238458 | 2.771630205 | 7084  | 62.17897451 |
| NM_145037    | 0.329245222 | 1.676867582 | 8593  | 62.17791873 |
| NM_001083625 | 0.41402401  | 6.153339856 | 11242 | 62.13003693 |
| NM_007011    | 0.349968129 | 4.423409613 | 9132  | 62.11801967 |
| NM_021998    | 0.037644542 | 2.1737461   | 4166  | 62.11480789 |
| NM_194313    | 0.212983975 | 1.603661474 | 6226  | 62.09950429 |
| NR_038253    | 0.181263084 | 1.741043478 | 5749  | 62.07840172 |
| NM_012090    | 0.53567536  | 14.25969448 | 17870 | 62.0703232  |
| NM_020733    | 0.352109759 | 4.72870249  | 9155  | 61.99128126 |
| NM_016531    | 0.172666997 | 2.751914515 | 5614  | 61.98927446 |
| NM_199420    | 0.338953502 | 4.29977221  | 8779  | 61.93762287 |
| NM_152918    | 0.22269267  | 1.178723404 | 6344  | 61.91193112 |
| NM_173630    | 0.265033554 | 3.084026505 | 7092  | 61.89447393 |
| NM_002224    | 0.348736018 | 6.633263205 | 9030  | 61.88721441 |
| NR_038254    | 0.176758179 | 1.625663717 | 5649  | 61.8747151  |
| NM_016297    | 0.156267448 | 1.988283429 | 5376  | 61.86349254 |
| NM_001206999 | 0.337056914 | 4.825103353 | 8707  | 61.86008577 |
| NM_000333    | 0.272254643 | 3.476124567 | 7224  | 61.85407436 |
| NM_002843    | 0.301935029 | 4.321060008 | 7848  | 61.84083466 |
| NM_001001548 | 0.100967265 | 1.588110853 | 4726  | 61.80482255 |
| NM_003573    | 0.129586628 | 1.023445261 | 5032  | 61.74415772 |
| NM_020782    | 0.232271985 | 1.792703664 | 6468  | 61.74366351 |
| NM_001018037 | 0.415125462 | 6.663436519 | 11144 | 61.74236585 |
| NM_020935    | 0.311227709 | 2.955677291 | 8031  | 61.72491215 |
| NM_199438    | 0.203714893 | 1.837410551 | 6008  | 61.72108547 |
| NM_030665    | 0.295442797 | 4.374020888 | 7659  | 61.65982587 |
| NM_004748    | 0.267640068 | 1.580476795 | 7088  | 61.65757362 |
| NM_001145808 | 0.104941752 | 1.497576396 | 4744  | 61.64865973 |
| NM_000632    | 0.104780578 | 1.504006748 | 4741  | 61.64026164 |
| NM_022340    | 0.247012135 | 1.972746331 | 6677  | 61.52883123 |
| NM_017684    | 0.466410318 | 9.179533484 | 13289 | 61.51111137 |
| NM_000124    | 0.265215639 | 2.012560662 | 7005  | 61.49842222 |
| NM_020821    | 0.46924562  | 9.054922125 | 13418 | 61.48051268 |
| NM_024955    | 0.131400136 | 2.34251497  | 5009  | 61.47453794 |
| NM_152558    | 0.256934404 | 1.183664524 | 6843  | 61.46818984 |
| NM_001017535 | 0.110423308 | 1.543664921 | 4774  | 61.46453531 |
| NM_002204    | 0.133359554 | 1.367813805 | 5026  | 61.43985696 |
| NM_183353    | 0.404135401 | 4.587543513 | 10628 | 61.42898751 |
| NM_006286    | 0.367687342 | 4.120521518 | 9433  | 61.41250226 |
| NM_001244949 | 0.231507595 | 1.941913261 | 6386  | 61.41211247 |
| NM_015091    | 0.222819017 | 2.246555591 | 6241  | 61.39729766 |
| NM_001242581 | 0.086242077 | 1.131129354 | 4506  | 61.33759581 |
| NM_033390    | 0.346621656 | 4.457590553 | 8806  | 61.31321323 |
| NM_001102371 | 0.130299611 | 2.363910682 | 4970  | 61.3123354  |
| NM_020918    | 0.232663624 | 1.929970233 | 6382  | 61.30052393 |
| NM_001042545 | 0.129566378 | 1.038709677 | 4959  | 61.29608154 |
| NM_004338    | 0.318301614 | 1.534627752 | 8085  | 61.2960202  |
| NM_173834    | 0.226665763 | 1.424546323 | 6281  | 61.28887281 |
| NR_024497    | 0.154338124 | 1.42318675  | 5252  | 61.28569434 |
| NM_016217    | 0.183010719 | 1.555061377 | 5620  | 61.24695705 |

|                   |             |             |       |             |
|-------------------|-------------|-------------|-------|-------------|
| NM_014735         | 0.12807283  | 1.263990268 | 4931  | 61.22766706 |
| NM_002210         | 0.269819011 | 2.249288965 | 7031  | 61.2264488  |
| NM_001128608      | 0.280981348 | 2.868137931 | 7249  | 61.2180098  |
| NM_001145855      | 0.362155506 | 3.820323526 | 9210  | 61.21313556 |
| NM_022892         | 0.202303387 | 1.556122449 | 5879  | 61.16309845 |
| NM_001163809      | 0.262172629 | 2.669093027 | 6868  | 61.14626092 |
| NM_153240         | 0.167673646 | 1.121896999 | 5397  | 61.14625384 |
| NM_033407         | 0.272220671 | 3.456040839 | 7051  | 61.11179966 |
| ENST00000553202.1 | 0.136706133 | 1.676717252 | 5007  | 61.08681065 |
| NM_198279         | 0.241999316 | 1.23952557  | 6491  | 61.06964595 |
| NM_004014         | 0.185570389 | 1.765249867 | 5622  | 61.06593006 |
| NM_018672         | 0.365069442 | 3.650448697 | 9248  | 61.05906366 |
| NM_198834         | 0.389161075 | 5.966362999 | 9988  | 61.04723116 |
| NM_015130         | 0.17579663  | 4.770324462 | 5485  | 61.04114924 |
| NM_014994         | 0.282176105 | 2.890901549 | 7231  | 61.04036078 |
| NM_007174         | 0.341179089 | 4.760894896 | 8581  | 61.02901015 |
| NM_199439         | 0.206127747 | 1.853095844 | 5894  | 60.94747088 |
| NM_003023         | 0.365051407 | 3.726246064 | 9208  | 60.92860299 |
| NM_001145856      | 0.363544765 | 3.734985805 | 9157  | 60.9038111  |
| NM_016955         | 0.189421429 | 1.888751107 | 5644  | 60.89597957 |
| NM_001260491      | 0.233563693 | 3.286212361 | 6309  | 60.87743327 |
| NM_001029882      | 0.244724855 | 2.068657635 | 6495  | 60.86880433 |
| NM_015990         | 0.307385915 | 2.356569059 | 7717  | 60.84369342 |
| NM_001145097      | 0.275774706 | 2.882827997 | 7057  | 60.83923538 |
| NM_001145000      | 0.268800638 | 2.23079145  | 6923  | 60.83912643 |
| NM_015266         | 0.231695482 | 3.325934206 | 6261  | 60.7932329  |
| NM_001198934      | 0.14258073  | 2.031225139 | 5027  | 60.79217507 |
| NM_015058         | 0.281574764 | 4.497486034 | 7159  | 60.78658713 |
| NM_003901         | 0.199968482 | 3.063789218 | 5768  | 60.76027387 |
| NM_148978         | 0.228830448 | 1.024040013 | 6197  | 60.70725865 |
| NM_001256468      | 0.31915112  | 4.657610063 | 7949  | 60.70255562 |
| NM_033450         | 0.149350407 | 1.878734277 | 5087  | 60.67105784 |
| NM_001178035      | 0.281343771 | 2.30195033  | 7126  | 60.66582434 |
| NM_015057         | 0.505131754 | 14.90336106 | 15024 | 60.65720223 |
| NM_001018038      | 0.398667481 | 6.475334119 | 10175 | 60.65713577 |
| NR_028062         | 0.286012247 | 1.492309824 | 7216  | 60.65114784 |
| NM_032873         | 0.269956961 | 2.547443141 | 6902  | 60.65071733 |
| NM_025136         | 0.316579522 | 2.164867268 | 7872  | 60.63599812 |
| NM_003940         | 0.319374349 | 3.713727468 | 7932  | 60.61772944 |
| NM_017990         | 0.322200797 | 4.113389174 | 7998  | 60.61662523 |
| NM_001199781      | 0.182249517 | 1.274431301 | 5494  | 60.61291029 |
| NM_001127257      | 0.173003518 | 1.775460808 | 5370  | 60.60253694 |
| NM_020342         | 0.169493593 | 1.810973318 | 5321  | 60.58144342 |
| NM_012199         | 0.29942012  | 4.70339663  | 7477  | 60.57889552 |
| NM_001100390      | 0.265191189 | 1.165097116 | 6795  | 60.57160559 |
| NM_152924         | 0.351937259 | 4.654149971 | 8734  | 60.56526851 |
| NM_015151         | 0.290795515 | 2.980246914 | 7289  | 60.54878716 |
| NM_001723         | 0.361669616 | 3.186485886 | 8997  | 60.5472437  |
| NM_014934         | 0.298084365 | 1.062684961 | 7433  | 60.51554971 |
| NR_033327         | 0.268265691 | 1.057903202 | 6838  | 60.50872009 |
| NM_030927         | 0.189832843 | 2.132819502 | 5578  | 60.50815193 |
| NM_007157         | 0.194377631 | 1.676533144 | 5641  | 60.5075497  |
| NM_018984         | 0.345189766 | 5.554657293 | 8534  | 60.49114114 |
| NM_182515         | 0.354822106 | 2.09430099  | 8790  | 60.48865332 |
| NM_001136557      | 0.280989218 | 3.47569935  | 7077  | 60.48671524 |
| NM_001122681      | 0.364786927 | 3.790692545 | 9067  | 60.48549445 |
| NM_001136156      | 0.311804726 | 3.195257839 | 7717  | 60.4555165  |
| NM_000376         | 0.113701329 | 1.598753492 | 4652  | 60.4505075  |



|                   |             |             |       |             |
|-------------------|-------------|-------------|-------|-------------|
| NM_003818         | 0.374038385 | 4.034323716 | 9322  | 60.43691001 |
| ENST00000422132.1 | 0.330630776 | 1.638370952 | 8151  | 60.4325872  |
| NM_001174117      | 0.351692556 | 4.898595764 | 8687  | 60.42489708 |
| NM_001007075      | 0.30953898  | 2.370510644 | 7656  | 60.41435291 |
| NM_182969         | 0.145660726 | 1.016396721 | 5000  | 60.41090939 |
| NM_020228         | 0.240250322 | 1.987029421 | 6321  | 60.40368299 |
| NM_001204401      | 0.341785224 | 3.218698028 | 8417  | 60.3873944  |
| NM_014899         | 0.190644128 | 3.356270212 | 5565  | 60.3770801  |
| NM_001167         | 0.343260126 | 3.229558632 | 8450  | 60.37007838 |
| NR_048537         | 0.234935675 | 3.29982335  | 6226  | 60.36740525 |
| NM_001004339      | 0.076531947 | 1.567782721 | 4270  | 60.3442388  |
| NM_138368         | 0.256945656 | 1.903714936 | 6594  | 60.3385749  |
| NM_001136558      | 0.278503941 | 3.551852382 | 6990  | 60.32155817 |
| NM_021090         | 0.36389788  | 2.705738434 | 8991  | 60.31576515 |
| NM_001174067      | 0.177362716 | 1.598697674 | 5374  | 60.3055413  |
| NM_005501         | 0.137083819 | 1.368679632 | 4884  | 60.30543304 |
| NM_001184691      | 0.119213968 | 3.476292183 | 4681  | 60.26147249 |
| NM_001193388      | 0.15588761  | 1.731290513 | 5090  | 60.22255352 |
| NM_006039         | 0.222010977 | 1.723464619 | 5991  | 60.21755653 |
| NM_198968         | 0.304411468 | 1.101722066 | 7490  | 60.19956069 |
| NM_005414         | 0.290606033 | 2.955410474 | 7198  | 60.1857133  |
| NM_001248008      | 0.290642918 | 2.960116732 | 7195  | 60.17004111 |
| NM_030641         | 0.402433435 | 4.304862412 | 10138 | 60.16756467 |
| NM_199437         | 0.242504483 | 2.000792393 | 6309  | 60.16727336 |
| NM_181483         | 0.328799962 | 1.489168327 | 8031  | 60.15015978 |
| NM_015186         | 0.40037682  | 6.515166584 | 10054 | 60.12399827 |
| NR_048538         | 0.232883525 | 3.28780726  | 6142  | 60.11961849 |
| NM_020761         | 0.274005175 | 3.674445741 | 6855  | 60.10868879 |
| NM_014910         | 0.311710209 | 3.172875131 | 7623  | 60.09443937 |
| NM_014381         | 0.320800519 | 2.596497955 | 7823  | 60.07364868 |
| ENST00000562691.1 | 0.127008952 | 1.19687368  | 4733  | 60.05899251 |
| NM_001146116      | 0.29618615  | 2.919895576 | 7277  | 60.03907547 |
| NM_001177387      | 0.274516193 | 3.56825814  | 6848  | 60.03570285 |
| NM_014859         | 0.079671311 | 1.438909774 | 4255  | 60.03337267 |
| NM_001144999      | 0.269225219 | 2.260966212 | 6747  | 60.02593128 |
| NM_018555         | 0.163028979 | 1.177911725 | 5142  | 60.01730053 |
| NM_015531         | 0.242759023 | 3.349570201 | 6281  | 60.01343759 |
| NM_144660         | 0.283126148 | 2.960051363 | 7008  | 60.01223296 |
| NM_020739         | 0.274907231 | 1.649729888 | 6848  | 60.00334341 |
| NM_201433         | 0.338109797 | 2.880404336 | 8210  | 59.97324267 |
| NM_153607         | 0.320400223 | 2.039835518 | 7781  | 59.94748054 |
| NR_049761         | 0.285861482 | 2.876029537 | 7041  | 59.92383923 |
| NM_015104         | 0.249386096 | 2.222658089 | 6372  | 59.91761093 |
| NM_001145098      | 0.268443636 | 2.795468098 | 6707  | 59.91174179 |
| NM_030624         | 0.243793717 | 1.540152964 | 6275  | 59.90280326 |
| NM_201432         | 0.337724411 | 2.892800391 | 8180  | 59.89842454 |
| NM_005504         | 0.39099001  | 9.556141439 | 9671  | 59.89079918 |
| NM_016598         | 0.468373421 | 2.982185086 | 12685 | 59.87588165 |
| NM_019072         | 0.18914266  | 1.51696314  | 5452  | 59.8718084  |
| NM_016120         | 0.417794792 | 4.672849437 | 10566 | 59.84548477 |
| NM_001184690      | 0.12167773  | 3.595735516 | 4642  | 59.84204998 |
| NM_153050         | 0.366159736 | 2.605186349 | 8907  | 59.81988169 |
| NM_001033047      | 0.11761136  | 3.607578397 | 4591  | 59.78793511 |
| NM_021082         | 0.195449374 | 1.129096506 | 5522  | 59.78628638 |
| NR_049762         | 0.285236453 | 2.853138853 | 6992  | 59.7672268  |
| NM_006856         | 0.269240908 | 3.186602871 | 6687  | 59.75715171 |
| NM_003774         | 0.186617441 | 1.306822395 | 5393  | 59.73241389 |
| NM_015092         | 0.528834652 | 14.55424837 | 16064 | 59.71730361 |

|                   |             |             |       |             |
|-------------------|-------------|-------------|-------|-------------|
| NM_198838         | 0.394799356 | 5.905412345 | 9736  | 59.71585624 |
| NM_001127448      | 0.147602308 | 1.473105134 | 4907  | 59.7104431  |
| NM_001252127      | 0.27490195  | 2.943526983 | 6781  | 59.70952407 |
| NR_037916         | 0.312670462 | 3.044683108 | 7541  | 59.6869626  |
| NM_173601         | 0.310223447 | 2.290598291 | 7487  | 59.6846078  |
| NM_001202519      | 0.43206706  | 5.995653749 | 11043 | 59.68161879 |
| NM_005509         | 0.435366116 | 8.494764164 | 11172 | 59.68049281 |
| NM_001178091      | 0.389700176 | 9.356761845 | 9560  | 59.67221934 |
| NM_020960         | 0.283388282 | 3.550187482 | 6933  | 59.66841554 |
| NM_001017395      | 0.235118066 | 2.05390304  | 6084  | 59.66079082 |
| NM_001256649      | 0.205292356 | 1.237579844 | 5635  | 59.65603025 |
| NM_001040108      | 0.3286637   | 2.617654509 | 7895  | 59.6507897  |
| NM_001130060      | 0.267286436 | 3.154566038 | 6624  | 59.63406207 |
| NM_000254         | 0.419633824 | 4.971585528 | 10557 | 59.63103593 |
| NM_001184693      | 0.12030093  | 3.35125136  | 4594  | 59.62516971 |
| NM_001166139      | 0.160688028 | 1.042831648 | 5042  | 59.59706037 |
| NM_007347         | 0.275101474 | 2.989495487 | 6758  | 59.59177344 |
| NM_000887         | 0.126057749 | 2.413422241 | 4648  | 59.58209856 |
| NM_001001890      | 0.301476741 | 3.165521034 | 7273  | 59.57138066 |
| NM_017780         | 0.446422207 | 6.589291883 | 11579 | 59.56816023 |
| ENST00000467148.1 | 0.336651108 | 3.84734623  | 8063  | 59.5648892  |
| NM_005688         | 0.220836051 | 1.343659079 | 5842  | 59.5538203  |
| NM_001099412      | 0.381978354 | 5.259450727 | 9284  | 59.54855842 |
| NM_001077445      | 0.129954927 | 1.311419424 | 4684  | 59.54567122 |
| NM_173595         | 0.360015933 | 5.540896488 | 8655  | 59.53915931 |
| NM_002646         | 0.317269561 | 4.807783329 | 7605  | 59.53863521 |
| NM_018993         | 0.08630612  | 1.200376737 | 4246  | 59.53751598 |
| NM_001178094      | 0.3912069   | 9.421955044 | 9564  | 59.53735068 |
| NM_207318         | 0.317329061 | 4.000526247 | 7600  | 59.51387268 |
| NM_153051         | 0.368627381 | 2.640018016 | 8880  | 59.49661079 |
| NM_198836         | 0.391414985 | 6.221117622 | 9555  | 59.48899066 |
| NM_001178106      | 0.105337059 | 1.041383989 | 4421  | 59.48667651 |
| NM_052941         | 0.241493181 | 2.085598047 | 6144  | 59.45454952 |
| NM_014606         | 0.150043472 | 1.052921945 | 4893  | 59.45444397 |
| NM_012291         | 0.269555095 | 6.111429866 | 6622  | 59.44044506 |
| NM_001099413      | 0.381921756 | 5.26187642  | 9240  | 59.41272092 |
| NM_172070         | 0.333804998 | 4.04790645  | 7952  | 59.40726457 |
| NM_001174065      | 0.177377386 | 1.646596357 | 5214  | 59.39996069 |
| NM_015111         | 0.232358545 | 2.042258226 | 5986  | 59.39183944 |
| NM_001242336      | 0.187769551 | 2.73681257  | 5345  | 59.3817676  |
| NM_199076         | 0.076401944 | 1.284849952 | 4131  | 59.36228474 |
| NM_001130059      | 0.268361933 | 3.201397327 | 6583  | 59.36195856 |
| NM_198837         | 0.395003865 | 5.966964471 | 9625  | 59.35440685 |
| NM_017698         | 0.158998606 | 2.328580036 | 4978  | 59.33680554 |
| NM_003489         | 0.317342904 | 4.140021175 | 7555  | 59.3362155  |
| NM_032932         | 0.361062315 | 2.414376812 | 8624  | 59.33526382 |
| NM_001256798      | 0.278444571 | 1.488984179 | 6762  | 59.33449928 |
| NM_152230         | 0.242333784 | 1.686287298 | 6132  | 59.33063491 |
| NM_015001         | 0.463461757 | 8.93244459  | 12226 | 59.32570095 |
| NM_001080424      | 0.275621701 | 3.063991647 | 6703  | 59.30619222 |
| NM_001130831      | 0.337968125 | 2.950024925 | 8023  | 59.29898998 |
| NM_001202518      | 0.429006072 | 6.117346939 | 10779 | 59.28171044 |
| NM_001079846      | 0.409571061 | 6.875719103 | 10081 | 59.28153532 |
| NM_014572         | 0.204025558 | 1.23691808  | 5541  | 59.25066084 |
| NM_015030         | 0.452350663 | 7.587818213 | 11705 | 59.24998916 |
| NM_033505         | 0.342859788 | 4.834789027 | 8128  | 59.24475268 |
| NM_182503         | 0.251074405 | 1.710858788 | 6252  | 59.21723941 |
| NM_032012         | 0.337933087 | 5.349881205 | 7996  | 59.20225883 |

|                |             |             |       |             |
|----------------|-------------|-------------|-------|-------------|
| TCONS_00029544 | 0.297750579 | 1.033905459 | 7107  | 59.2017504  |
| NM_003036      | 0.216407091 | 2.347818469 | 5706  | 59.19109589 |
| NM_001174156   | 0.281452803 | 3.068268947 | 6781  | 59.17008209 |
| NM_001145156   | 0           | 3.034561554 | 3500  | 59.16079783 |
| NM_053043      | 0.417810909 | 6.183535109 | 10324 | 59.15453725 |
| NM_004326      | 0.253256553 | 2.433237731 | 6275  | 59.15320571 |
| NM_001184692   | 0.118605046 | 3.482574917 | 4504  | 59.15204326 |
| NM_022817      | 0.257192044 | 2.676442763 | 6341  | 59.15009187 |
| NM_001099650   | 0.312641218 | 2.296146045 | 7394  | 59.10486218 |
| NM_006766      | 0.382233738 | 5.306566153 | 9152  | 59.09928035 |
| NM_001128309   | 0.181444755 | 1.989635317 | 5209  | 59.07791703 |
| NM_017617      | 0.38725467  | 6.141796665 | 9294  | 59.07195497 |
| NM_014904      | 0.241224582 | 1.729417588 | 6060  | 59.06763257 |
| NM_001162529   | 0.233589205 | 1.788169869 | 5933  | 59.03353466 |
| NM_001178092   | 0.393956394 | 9.163347033 | 9488  | 59.03250487 |
| NM_007200      | 0.487988136 | 9.204514673 | 13289 | 59.02366525 |
| NM_001256469   | 0.323950188 | 4.722287813 | 7622  | 59.02189768 |
| NM_001178108   | 0.102950589 | 1.092169092 | 4328  | 59.01467115 |
| NM_001178107   | 0.103708127 | 1.045905421 | 4334  | 59.00569253 |
| NR_048539      | 0.244485876 | 3.239547467 | 6098  | 58.99786524 |
| NM_030627      | 0.330704078 | 6.239670485 | 7768  | 58.98923819 |
| NM_022459      | 0.406715286 | 5.093778452 | 9884  | 58.98336249 |
| NM_173500      | 0.213660179 | 1.571377778 | 5624  | 58.97024405 |
| NM_001142749   | 0.286945579 | 1.291709314 | 6838  | 58.96403905 |
| NM_177438      | 0.418346204 | 8.20229639  | 10276 | 58.9625985  |
| NM_001270381   | 0.143059868 | 1.047749842 | 4732  | 58.94851244 |
| NM_007150      | 0.103666721 | 1.069116967 | 4325  | 58.94711803 |
| NR_072996      | 0.251282783 | 3.222240155 | 6195  | 58.93027605 |
| NM_006738      | 0.489150876 | 9.17087656  | 13301 | 58.91620977 |
| NM_015089      | 0.331675849 | 4.087247458 | 7770  | 58.91117227 |
| NM_014630      | 0.348954809 | 3.691038024 | 8178  | 58.87551086 |
| NM_001135179   | 0.475683334 | 3.003253452 | 12601 | 58.85673527 |
| NM_173462      | 0.229471947 | 1.644608263 | 5832  | 58.84332601 |
| NM_030621      | 0.41810376  | 8.269738773 | 10220 | 58.82622755 |
| NM_015458      | 0.316727876 | 2.296556381 | 7404  | 58.79317417 |
| NM_001127231   | 0.236878145 | 4.539925876 | 5935  | 58.79010736 |
| NR_027053      | 0.351866933 | 3.092025286 | 8225  | 58.78034528 |
| NM_153033      | 0.173245476 | 1.95367254  | 5050  | 58.75194774 |
| NM_178566      | 0.387183875 | 4.008832188 | 9170  | 58.68334376 |
| NM_001178093   | 0.390433379 | 9.723133362 | 9267  | 58.68008837 |
| NM_001159293   | 0.35958276  | 2.126802527 | 8390  | 58.66026151 |
| NM_199039      | 0.324234795 | 2.263702721 | 7534  | 58.65548552 |
| NM_001256426   | 0.256328813 | 2.485930214 | 6218  | 58.64166794 |
| NM_020686      | 0.154938419 | 1.537598671 | 4813  | 58.62681333 |
| NM_005236      | 0.286995979 | 2.731844402 | 6760  | 58.6226339  |
| NM_014803      | 0.356500171 | 4.573839662 | 8294  | 58.60443071 |
| NM_018440      | 0.434708475 | 6.638276087 | 10742 | 58.58886013 |
| NM_201591      | 0.035671563 | 5.325568797 | 3691  | 58.58642481 |
| NM_001270384   | 0.26822672  | 1.416692668 | 6409  | 58.5830102  |
| NM_017649      | 0.095728588 | 1.237017627 | 4197  | 58.58255184 |
| NM_000051      | 0.489080479 | 9.554346999 | 13146 | 58.57999226 |
| NM_001185127   | 0.183789704 | 1.249029503 | 5151  | 58.57979452 |
| NM_005927      | 0.175573041 | 2.816597346 | 5048  | 58.57494077 |
| NM_001199260   | 0.358411036 | 3.317008762 | 8330  | 58.55707648 |
| NM_152787      | 0.289311905 | 2.994990423 | 6786  | 58.54448207 |
| NM_003566      | 0.345560143 | 5.242284143 | 8002  | 58.54219672 |
| NM_001146189   | 0.234642024 | 2.168547009 | 5849  | 58.53362527 |
| NM_198268      | 0.351838285 | 5.298613667 | 8150  | 58.51432226 |

|                   |              |             |       |             |
|-------------------|--------------|-------------|-------|-------------|
| NM_018085         | 0.452344934  | 5.824632095 | 11415 | 58.51201676 |
| NM_004857         | 0.273844942  | 1.129643903 | 6486  | 58.48141054 |
| NR_027671         | 0.44086516   | 8.803329674 | 10931 | 58.45834306 |
| NM_007005         | 0.151453601  | 2.722561618 | 4746  | 58.45739548 |
| NM_001195573      | 0.413079507  | 8.288680577 | 9920  | 58.45680968 |
| NM_013320         | 0.228040175  | 1.732519616 | 5734  | 58.45525281 |
| NM_000046         | 0.249953508  | 1.697413935 | 6070  | 58.43627577 |
| NM_001145998      | 0.207159215  | 1.117679558 | 5429  | 58.41789499 |
| NR_024052         | 0.292405742  | 2.44966246  | 6813  | 58.40546614 |
| NM_145034         | 0.343450677  | 2.592264914 | 7911  | 58.39599328 |
| NM_006772         | 0.246702301  | 1.5359401   | 6009  | 58.39393508 |
| NM_001171654      | 0.310956622  | 2.48913649  | 7179  | 58.38194236 |
| NM_001973         | 0.447152512  | 7.526145843 | 11148 | 58.37189874 |
| NM_181787         | 0.260943303  | 1.963907603 | 6233  | 58.34804651 |
| ENST00000446344.1 | 0.299555144  | 1.504900548 | 6937  | 58.33910971 |
| NR_033712         | -0.011930544 | 1.282190132 | 3323  | 58.33320997 |
| NM_017644         | 0.318955239  | 1.686135371 | 7327  | 58.29599944 |
| NM_001257999      | 0.354680556  | 4.929788016 | 8160  | 58.29345956 |
| NR_037804         | 0.339433787  | 2.525808937 | 7787  | 58.29099163 |
| NM_001145306      | 0.461468894  | 12.48246138 | 11716 | 58.29086165 |
| NM_024742         | 0.14732249   | 1.504172908 | 4672  | 58.28223871 |
| NM_198549         | 0.272078062  | 1.415170907 | 6406  | 58.26104571 |
| NM_001199942      | 0.348498534  | 3.273545966 | 7994  | 58.25020653 |
| NM_002754         | 0.268899634  | 3.609168242 | 6347  | 58.24534878 |
| NM_014727         | 0.367113102  | 5.299917346 | 8468  | 58.23935139 |
| NM_004426         | 0.190420421  | 2.195324575 | 5175  | 58.23910902 |
| NM_003615         | 0.338841976  | 4.8356747   | 7758  | 58.23447448 |
| NM_017919         | 0.299358321  | 3.30298205  | 6907  | 58.22918295 |
| NM_001099455      | 0.229862708  | 1.696344236 | 5716  | 58.22563905 |
| NM_020336         | 0.373459582  | 5.768990273 | 8635  | 58.22108082 |
| NR_003572         | 0.234661911  | 1.539910159 | 5787  | 58.2210547  |
| NM_003411         | 0.195803646  | 1.458587786 | 5239  | 58.20848542 |
| NM_001178109      | 0.105941907  | 1.078084454 | 4238  | 58.2031132  |
| NM_015285         | 0.317918818  | 3.19994507  | 7281  | 58.20115235 |
| NM_015241         | 0.401190494  | 8.117429055 | 9443  | 58.1893734  |
| NM_015018         | 0.347842535  | 3.357196684 | 7961  | 58.18838206 |
| ENST00000441493.1 | 0.401187069  | 8.122377622 | 9437  | 58.17121668 |
| NM_014283         | 0.22649545   | 2.968346596 | 5654  | 58.16219323 |
| NM_001256648      | 0.234873176  | 1.180384682 | 5770  | 58.11942843 |
| NR_027768         | 0.119639449  | 1.775407203 | 4358  | 58.11713362 |
| NM_014494         | 0.367011731  | 6.63084778  | 8421  | 58.08680579 |
| NM_003762         | 0.191096818  | 1.271387003 | 5154  | 58.07226311 |
| NM_001042459      | 0.105397794  | 1.341486583 | 4210  | 58.0458283  |
| NM_014503         | 0.388561613  | 5.708990011 | 9009  | 58.03513442 |
| NM_001122838      | 0.207641187  | 1.26962521  | 5362  | 58.02101171 |
| NR_048540         | 0.246295273  | 3.293670886 | 5924  | 58.0107879  |
| NM_173082         | 0.306497084  | 3.25278651  | 6997  | 58.01018205 |
| NM_001167856      | 0.446610629  | 7.224205446 | 10980 | 57.98717924 |
| NM_001163034      | 0.274097834  | 3.635067377 | 6381  | 57.98590831 |
| NM_004380         | 0.42595676   | 7.117889368 | 10195 | 57.96131399 |
| NM_016255         | 0.158514254  | 1.92223393  | 4744  | 57.95876248 |
| NM_001174066      | 0.176683615  | 1.68490109  | 4953  | 57.94299273 |
| TCONS_00015261    | 0.289013492  | 3.886479976 | 6641  | 57.93994781 |
| NM_001560         | 0.084627467  | 1.862705941 | 4005  | 57.92941421 |
| NM_018183         | 0.44732911   | 7.227272727 | 10977 | 57.90398093 |
| NM_001259         | 0.462759439  | 12.51532897 | 11611 | 57.89000763 |
| NM_194282         | 0.260455015  | 2.725477395 | 6126  | 57.88327464 |
| NM_001164388      | 0.355543421  | 4.763699479 | 8065  | 57.87564545 |

|                   |              |             |       |             |
|-------------------|--------------|-------------|-------|-------------|
| NM_052834         | 0.317161455  | 3.267993874 | 7182  | 57.86830055 |
| NM_015500         | 0.27360198   | 2.261068221 | 6346  | 57.86616291 |
| NM_001172674      | 0.142494299  | 1.397672376 | 4553  | 57.86098746 |
| NM_001080450      | 0.290966482  | 2.181081081 | 6659  | 57.85904661 |
| NM_017672         | 0.432933945  | 7.03268288  | 10402 | 57.8351779  |
| NM_001128149      | 0.277524827  | 3.619984387 | 6404  | 57.81607288 |
| NM_014007         | 0.251908238  | 2.775117214 | 5971  | 57.80673069 |
| NM_001002814      | 0.347873455  | 5.185845214 | 7855  | 57.79695696 |
| NM_014990         | 0.348290956  | 3.528102747 | 7863  | 57.78936009 |
| NM_003644         | 0.344695791  | 2.805995111 | 7772  | 57.77092924 |
| NM_001164387      | 0.357489296  | 4.726518995 | 8080  | 57.75452918 |
| NM_000932         | 0.23685242   | 1.758030726 | 5727  | 57.75267742 |
| NM_001258379      | 0.34321483   | 5.087934825 | 7732  | 57.75229675 |
| NM_001142579      | 0.114057618  | 1.645411765 | 4249  | 57.74958182 |
| NR_047571         | 0.347868045  | 4.945918367 | 7839  | 57.73854208 |
| NM_020120         | 0.443945971  | 8.929585305 | 10778 | 57.72794287 |
| NM_194301         | 0.347867762  | 3.560704711 | 7832  | 57.71278197 |
| NM_018017         | 0.271582288  | 2.77090967  | 6276  | 57.70613203 |
| NM_005512         | 0.12113503   | 1.729823748 | 4311  | 57.70469715 |
| NM_012164         | 0.397964442  | 4.775636839 | 9185  | 57.69812807 |
| NR_026777         | 0.380619161  | 2.673316421 | 8671  | 57.6756316  |
| TCONS_00023420    | 0.252290721  | 2.219159664 | 5949  | 57.6706378  |
| NM_003453         | 0.430503605  | 3.980284989 | 10245 | 57.64305116 |
| NM_001178110      | 0.105045518  | 1.093034466 | 4148  | 57.63951548 |
| ENST00000383701.3 | 0.16201231   | 1.567533291 | 4730  | 57.63259957 |
| NR_030672         | 0.290433901  | 1.36986509  | 6596  | 57.6279514  |
| NM_016376         | 0.354170913  | 5.044729237 | 7958  | 57.61287769 |
| NM_130855         | 0.257331042  | 6.966101695 | 6017  | 57.60832888 |
| NM_001085459      | 0.276014675  | 2.511844599 | 6331  | 57.6057612  |
| NM_001039590      | 0.482726981  | 9.376743811 | 12400 | 57.6010856  |
| NM_022153         | 0.166339307  | 1.261889797 | 4772  | 57.58900071 |
| NM_001145650      | 0.198765255  | 1.306560867 | 5166  | 57.58866021 |
| NM_005359         | 0.385128935  | 3.63310911  | 8770  | 57.5816165  |
| NM_178229         | 0.259777576  | 2.220588235 | 6051  | 57.58055067 |
| ENST00000382832.3 | 0            | 2.009351433 | 3314  | 57.56735186 |
| NM_197968         | 0.430031526  | 4.020001961 | 10198 | 57.55835033 |
| NM_138799         | 0.067214742  | 1.786803365 | 3803  | 57.52343822 |
| NM_130853         | 0.258199572  | 6.993506494 | 6005  | 57.4835506  |
| NM_002114         | 0.389806667  | 5.241491999 | 8873  | 57.47813911 |
| NM_032831         | 0.443380576  | 4.185084428 | 10659 | 57.46674362 |
| NM_006457         | 0.26628783   | 2.865133725 | 6131  | 57.45017826 |
| NM_139075         | 0.189584909  | 1.341026661 | 5025  | 57.44808452 |
| NR_024053         | 0.29287854   | 2.482121212 | 6599  | 57.44246681 |
| NM_001042683      | 0.329231338  | 3.489158598 | 7332  | 57.43597431 |
| NM_001190965      | 0.430077639  | 4.035063528 | 10152 | 57.42374356 |
| NM_001184883      | 0.227547831  | 1.644834449 | 5526  | 57.42183107 |
| NM_001135776      | 0.249156914  | 2.77329458  | 5848  | 57.41863557 |
| NM_012102         | 0.365773305  | 5.400414938 | 8193  | 57.40715117 |
| NM_022474         | 0.233497243  | 2.536198288 | 5607  | 57.39565278 |
| NM_001008222      | 0.157269307  | 1.048717396 | 4638  | 57.39237322 |
| NM_152432         | 0.167421272  | 1.097011785 | 4751  | 57.38756871 |
| NM_018704         | 0.253092535  | 1.83779661  | 5899  | 57.36618885 |
| NM_001202515      | 0.418091226  | 5.834413914 | 9716  | 57.3586153  |
| NM_018925         | 0.152456166  | 1.109654871 | 4577  | 57.33933147 |
| NM_002111         | 0.506204822  | 12.96727273 | 13474 | 57.31853952 |
| TCONS_00017338    | -0.056449525 | 26.1407206  | 2941  | 57.29230094 |
| NM_032452         | 0.136716084  | 1.024069028 | 4403  | 57.28329512 |
| NM_001256650      | 0.228154105  | 1.217501816 | 5507  | 57.2780385  |

|                   |              |             |       |             |
|-------------------|--------------|-------------|-------|-------------|
| NM_032444         | 0.329258569  | 3.288300645 | 7290  | 57.26890733 |
| NM_032970         | 0.28458687   | 3.375136655 | 6402  | 57.2419924  |
| NM_001177382      | 0.309780915  | 1.924396627 | 6877  | 57.23826699 |
| NR_034165         | 0.212388025  | 1.898504071 | 5280  | 57.2307282  |
| NM_001145649      | 0.20835664   | 1.33537402  | 5226  | 57.22875213 |
| NM_020803         | 0.154005154  | 2.660183566 | 4575  | 57.22203072 |
| TCONS_00023421    | 0.243844167  | 2.238120196 | 5723  | 57.2035761  |
| NM_015202         | 0.297385242  | 2.100860637 | 6622  | 57.17574811 |
| NM_001003408      | 0.348102916  | 6.560899519 | 7692  | 57.17401304 |
| NR_046282         | 0.100392426  | 1.355693069 | 4039  | 57.17287476 |
| NM_001190964      | 0.432308839  | 4.011639377 | 10137 | 57.15666173 |
| ENST00000416385.1 | 0.180068713  | 1.588271605 | 4859  | 57.15456297 |
| NM_017658         | 0.293847483  | 1.48969623  | 6550  | 57.1503851  |
| NM_000916         | 0.134513481  | 1.625688073 | 4359  | 57.14177703 |
| NM_001085460      | 0.272708231  | 2.581335062 | 6171  | 57.13292329 |
| NM_001221         | 0.254393849  | 4.315224796 | 5871  | 57.13017081 |
| NM_032427         | 0.224630597  | 4.071481209 | 5427  | 57.1200488  |
| NM_018218         | 0.237792715  | 3.005875022 | 5616  | 57.11979561 |
| NM_013373         | 0.193097571  | 1.988028731 | 5011  | 57.11934574 |
| NM_030958         | 0.07213278   | 2.074406332 | 3789  | 57.1147309  |
| NM_172127         | 0.251327838  | 4.364261168 | 5819  | 57.11048701 |
| NM_001199397      | 0.242287544  | 2.410107413 | 5678  | 57.09553161 |
| NM_001202517      | 0.43482875   | 6.410093092 | 10204 | 57.09068922 |
| NM_004863         | 0.368127575  | 4.601298383 | 8163  | 57.08924523 |
| NM_014964         | 0.178961329  | 1.057290589 | 4834  | 57.08433363 |
| NM_001145275      | 0.192466937  | 1.404961985 | 4997  | 57.08407759 |
| NM_004075         | 0            | 1.424009825 | 3256  | 57.06137047 |
| NM_002393         | 0.431624481  | 5.228044061 | 10076 | 57.05312582 |
| NM_001204171      | 0.427353561  | 5.096202277 | 9926  | 57.05237126 |
| NM_016032         | 0.16045952   | 1.099372158 | 4618  | 57.05170205 |
| NM_020951         | 0.20473563   | 1.383284742 | 5144  | 57.03770005 |
| ENST00000569969.1 | 0.216277812  | 1.924471299 | 5295  | 57.02891705 |
| NR_024171         | 0.429964178  | 5.153062244 | 10008 | 57.02637905 |
| NM_024744         | 0.259423368  | 1.445269017 | 5928  | 57.01959152 |
| NM_017552         | 0.364649144  | 4.126505276 | 8054  | 57.01897845 |
| NM_032663         | 0.069223881  | 1.288835598 | 3752  | 57.0133614  |
| NM_001085458      | 0.284559634  | 2.623149606 | 6349  | 57.0067265  |
| NM_182485         | 0.311495131  | 1.933907207 | 6853  | 56.99639421 |
| NM_001130050      | 0.109683436  | 1.596923828 | 4095  | 56.9733041  |
| NM_024709         | -0.045174927 | 2.138963661 | 2971  | 56.96922466 |
| NM_001177381      | 0.308956998  | 1.911725761 | 6796  | 56.96810309 |
| NM_080836         | 0.28853109   | 3.797379504 | 6410  | 56.96196222 |
| ENST00000427522.2 | 0.356147069  | 3.665516801 | 7826  | 56.95824494 |
| NM_005921         | 0.342823954  | 3.558913593 | 7510  | 56.95104451 |
| NM_133496         | 0.371759585  | 3.481495009 | 8213  | 56.93466673 |
| NM_005121         | 0.443496233  | 8.510845676 | 10464 | 56.92682654 |
| NM_001242338      | 0.365172838  | 4.108830846 | 8039  | 56.91890216 |
| NM_017666         | 0.169231199  | 1.61171459  | 4694  | 56.91827392 |
| NM_012224         | 0.244371136  | 2.418649744 | 5672  | 56.90843598 |
| NM_001142964      | 0.193230927  | 1.697286432 | 4974  | 56.89867222 |
| NM_020121         | 0.189480051  | 2.255629945 | 4928  | 56.8982695  |
| NM_022162         | 0.150365862  | 2.373913043 | 4484  | 56.89377568 |
| NM_007054         | 0.280730997  | 2.687869586 | 6256  | 56.89049526 |
| NM_003679         | 0.216062791  | 1.117356627 | 5265  | 56.88273455 |
| NM_016227         | 0.230670015  | 2.94255397  | 5465  | 56.8732102  |
| NM_001256653      | 0.21506285   | 1.324633263 | 5248  | 56.86326561 |
| NM_001003407      | 0.348089197  | 6.739256144 | 7608  | 56.86217008 |
| NM_001042681      | 0.364690144  | 5.52665751  | 8008  | 56.85224584 |

|                   |             |             |       |             |
|-------------------|-------------|-------------|-------|-------------|
| NM_014969         | 0.138340646 | 1.802435102 | 4352  | 56.84340046 |
| NM_015349         | 0.295725015 | 3.898234843 | 6514  | 56.84157987 |
| NM_001177383      | 0.310188621 | 1.920889806 | 6787  | 56.82890379 |
| NM_015188         | 0.250481379 | 1.355714037 | 5748  | 56.82517825 |
| NM_001008405      | 0.252172097 | 2.790057163 | 5772  | 56.81523751 |
| NM_001184790      | 0.250044592 | 3.209756098 | 5739  | 56.81376281 |
| NM_001258380      | 0.339062216 | 5.125490727 | 7386  | 56.80220978 |
| NM_020747         | 0.243918621 | 1.862178919 | 5644  | 56.80179303 |
| NM_020367         | 0.15262053  | 1.49109528  | 4491  | 56.78707052 |
| NM_001039591      | 0.489067392 | 9.531126042 | 12352 | 56.78482116 |
| NM_001142550      | 0.141392803 | 1.755144033 | 4373  | 56.7785455  |
| NM_002313         | 0.348076597 | 6.760216188 | 7585  | 56.77725143 |
| NM_001011513      | 0.254933348 | 2.800689061 | 5804  | 56.76214875 |
| NR_036634         | 0.299351474 | 2.068708105 | 6563  | 56.76117991 |
| NM_001146008      | 0.071268183 | 2.03935743  | 3734  | 56.75151776 |
| NM_001144967      | 0.383863974 | 2.405682622 | 8481  | 56.74141141 |
| NM_001695         | 0.248651135 | 2.162692847 | 5703  | 56.74052117 |
| NM_018263         | 0.330086932 | 3.754530248 | 7173  | 56.73732616 |
| NM_033637         | 0.277281839 | 3.035366645 | 6163  | 56.73682804 |
| NM_001128922      | 0.125287511 | 1.800570478 | 4206  | 56.72832511 |
| NM_001184785      | 0.267642903 | 3.596233961 | 6000  | 56.72813679 |
| NM_001177384      | 0.310695432 | 1.921305182 | 6772  | 56.72436349 |
| NM_153704         | 0.174794638 | 1.064748201 | 4725  | 56.72349054 |
| NM_152890         | 0.296422837 | 1.204307692 | 6499  | 56.71984081 |
| NM_206866         | 0.253224526 | 3.079216502 | 5768  | 56.71561841 |
| NM_001144964      | 0.382714088 | 2.378852537 | 8435  | 56.69293079 |
| NM_003047         | 0.176728936 | 2.726486714 | 4741  | 56.68626322 |
| NR_033652         | 0.182059233 | 1.129737609 | 4801  | 56.67450131 |
| NM_003426         | 0.097474364 | 1.397565923 | 3943  | 56.6725736  |
| NM_172128         | 0.254269956 | 4.393524931 | 5775  | 56.67057705 |
| NM_031915         | 0.281579803 | 1.675723473 | 6219  | 56.65507408 |
| NM_019619         | 0.269205048 | 3.538768719 | 6009  | 56.64957301 |
| NM_001142551      | 0.1410521   | 1.825517241 | 4349  | 56.64499281 |
| NR_023392         | 0.231272745 | 1.106077348 | 5429  | 56.64116798 |
| NM_198551         | 0.371535929 | 4.033608273 | 8122  | 56.63852661 |
| NM_001193362      | 0.213845329 | 1.938547486 | 5190  | 56.63588331 |
| NM_015695         | 0.270265094 | 2.900215839 | 6022  | 56.62855718 |
| NM_001256428      | 0.267872929 | 2.819063545 | 5979  | 56.61098899 |
| NM_003939         | 0.272483374 | 3.023282695 | 6055  | 56.6108918  |
| NM_194449         | 0.292991397 | 1.889720792 | 6410  | 56.60485906 |
| TCONS_00000438    | 0.187940569 | 1.372375463 | 4857  | 56.59419232 |
| NM_182646         | 0.311928513 | 1.930514488 | 6763  | 56.58525215 |
| NM_016340         | 0.381149656 | 5.057317219 | 8356  | 56.56982726 |
| ENST00000484859.1 | 0.188644683 | 1.38744856  | 4859  | 56.55676184 |
| NM_001142568      | 0.40047629  | 5.475500112 | 8897  | 56.54942047 |
| NM_014915         | 0.313137338 | 3.113586075 | 6778  | 56.54844816 |
| NM_020937         | 0.330350355 | 2.404741863 | 7127  | 56.53286853 |
| NM_001256053      | 0.313208705 | 3.113783943 | 6775  | 56.53005811 |
| NM_001144965      | 0.382746776 | 2.392107773 | 8387  | 56.52839941 |
| NR_046020         | 0           | 3.365769712 | 3195  | 56.52433104 |
| TCONS_00017672    | 0.219387858 | 1.299771167 | 5243  | 56.52300347 |
| NM_001199398      | 0.241186313 | 2.453758789 | 5546  | 56.50997149 |
| NM_001184788      | 0.262509532 | 3.258514986 | 5871  | 56.50832722 |
| NM_003243         | 0.297272219 | 2.119220659 | 6466  | 56.50735419 |
| NM_004017         | 0.165408604 | 2.380017452 | 4583  | 56.50004998 |
| NM_001144968      | 0.382830718 | 2.394962998 | 8377  | 56.48700643 |
| NM_019112         | 0.315864692 | 3.649017307 | 6817  | 56.48571777 |
| NM_017640         | 0.23352802  | 1.501196833 | 5430  | 56.48019634 |

|                   |              |             |       |             |
|-------------------|--------------|-------------|-------|-------------|
| NM_001195683      | 0.297488562  | 2.112314356 | 6463  | 56.47685154 |
| NM_153717         | 0.295650177  | 5.426283048 | 6429  | 56.47550493 |
| NM_001144966      | 0.380686545  | 2.416335859 | 8312  | 56.46291334 |
| NM_001331         | 0.286848511  | 2.696442814 | 6268  | 56.46070379 |
| NM_015028         | 0.258977325  | 13.54288667 | 5805  | 56.45892563 |
| NM_001161560      | 0.257494133  | 13.49602214 | 5781  | 56.45486518 |
| NM_001164386      | 0.383380206  | 4.98806825  | 8380  | 56.44681876 |
| NM_001146028      | 0.137022873  | 1.046517064 | 4277  | 56.43764846 |
| NM_014699         | 0.283665507  | 3.092300258 | 6207  | 56.43606653 |
| NM_001199782      | 0.17954202   | 1.233291032 | 4727  | 56.40909658 |
| ENST00000284617.2 | 0.214493533  | 1.427768082 | 5156  | 56.40352144 |
| NM_015277         | 0.385421331  | 2.412491095 | 8421  | 56.3974303  |
| NM_001144970      | 0.383326038  | 2.404736276 | 8360  | 56.38437228 |
| NM_018914         | 0.192116522  | 1.112684729 | 4871  | 56.38424783 |
| NM_001243960      | 0.380734578  | 2.301085645 | 8289  | 56.38036727 |
| NM_012281         | 0.228040726  | 2.847927995 | 5332  | 56.36888695 |
| NM_001126340      | 0.456927514  | 4.362522054 | 10768 | 56.35407475 |
| NM_053279         | 0.119181379  | 1.319081358 | 4092  | 56.34485944 |
| NM_024420         | -0.04140772  | 1.682718579 | 2927  | 56.34198634 |
| NM_018126         | 0.358648997  | 4.550343398 | 7716  | 56.33676279 |
| NM_001199400      | 0.24336747   | 2.462551886 | 5540  | 56.3170492  |
| NM_018136         | 0.460259631  | 9.712068332 | 10887 | 56.3169353  |
| NM_004937         | 0.153953376  | 1.421800948 | 4430  | 56.31137864 |
| NM_145167         | 0.143410755  | 1.639287367 | 4321  | 56.30730617 |
| NM_018207         | 0.091393842  | 1.097630825 | 3840  | 56.30426432 |
| NM_001256045      | 0.186199699  | 1.959882992 | 4785  | 56.29357337 |
| NM_005433         | 0.177653332  | 1.497972252 | 4684  | 56.28120409 |
| NM_014665         | 0.230762577  | 3.04782365  | 5352  | 56.27538261 |
| NM_001256856      | 0.278705459  | 2.9871837   | 6085  | 56.2655977  |
| NM_016173         | 0.265078969  | 1.839276574 | 5860  | 56.25867298 |
| NM_001184789      | 0.259272049  | 3.395417462 | 5760  | 56.21279887 |
| NM_001256654      | 0.215121834  | 1.268758527 | 5130  | 56.21612814 |
| NM_145257         | 0.2144466384 | 1.437805116 | 5120  | 56.20821003 |
| NM_022350         | 0.254793012  | 2.521792619 | 5689  | 56.20757978 |
| NM_172232         | 0.37878458   | 3.884554237 | 8176  | 56.17106636 |
| NM_015906         | 0.38494668   | 6.140424511 | 8338  | 56.16214838 |
| NM_001080497      | 0.287338753  | 1.171980676 | 6209  | 56.15571656 |
| NM_001144884      | 0.368159603  | 3.451392405 | 7899  | 56.15564842 |
| NM_001144969      | 0.384454739  | 2.401899495 | 8317  | 56.13624294 |
| NM_001286         | 0.256334614  | 3.532994033 | 5697  | 56.13072835 |
| NM_002918         | 0.151743101  | 1.769933745 | 4376  | 56.11333194 |
| NM_020205         | 0.299300748  | 3.048814722 | 6411  | 56.10409251 |
| NM_001186         | 0.252994981  | 3.146959759 | 5640  | 56.10002719 |
| NM_006092         | 0.163268118  | 1.870329181 | 4495  | 56.09848918 |
| NM_018844         | 0.276991252  | 2.787007809 | 6018  | 56.08795991 |
| NM_004015         | 0.175181038  | 2.138654553 | 4622  | 56.07555843 |
| NM_001144971      | 0.388394423  | 2.374494409 | 8405  | 56.07125747 |
| NM_001105531      | 0.259322901  | 1.790612459 | 5730  | 56.06685921 |
| NM_022835         | 0.357368218  | 4.554489286 | 7606  | 56.04545002 |
| NM_018340         | 0.284935626  | 2.528569103 | 6142  | 56.04024784 |
| NM_001172675      | 0.138693613  | 1.488899386 | 4233  | 56.03789353 |
| ENST00000366687.1 | 0.214441928  | 1.446846139 | 5088  | 56.03402854 |
| NM_152419         | 0.22393025   | 2.225738397 | 5213  | 56.03309588 |
| NM_017934         | 0.487943296  | 9.816480027 | 11965 | 56.01113945 |
| NR_046428         | 0.257065235  | 3.524463217 | 5681  | 55.99678274 |
| NM_001256295      | 0.107326373  | 1.344091487 | 3934  | 55.98992455 |
| NM_198990         | 0.213326091  | 1.265310154 | 5061  | 55.964537   |
| NM_152748         | 0.302384353  | 1.280919826 | 6435  | 55.96164709 |



|              |             |             |       |             |
|--------------|-------------|-------------|-------|-------------|
| NM_001040424 | 0.313990768 | 3.421250376 | 6653  | 55.95497709 |
| NM_001206883 | 0.280534302 | 2.471152257 | 6048  | 55.95204753 |
| NM_001172630 | 0.138512312 | 1.055700403 | 4218  | 55.95029269 |
| NM_001130049 | 0.112925704 | 1.679065092 | 3978  | 55.94900722 |
| NM_005631    | 0.084658999 | 1.315761306 | 3736  | 55.94822978 |
| NM_148921    | 0.180811594 | 1.098842196 | 4663  | 55.93923269 |
| NM_001161561 | 0.260280495 | 13.70029725 | 5718  | 55.93570879 |
| NM_024345    | 0.371202983 | 2.716704574 | 7913  | 55.93466681 |
| NM_001161562 | 0.258796157 | 13.65338016 | 5694  | 55.93020275 |
| NM_001184791 | 0.257433661 | 3.376806486 | 5673  | 55.92959185 |
| NM_032584    | 0.140060791 | 1.495627511 | 4230  | 55.92911342 |
| NM_130759    | 0.158383572 | 1.045969203 | 4415  | 55.92159606 |
| NM_001080410 | 0.328177203 | 5.037240185 | 6927  | 55.9148714  |
| NM_001080825 | 0.354892777 | 1.459254328 | 7509  | 55.901435   |
| NM_020235    | 0.404407569 | 5.477066303 | 8807  | 55.89373975 |
| NM_015087    | 0.210828613 | 2.005383848 | 5014  | 55.8809133  |
| NM_018392    | 0.319294208 | 3.619881306 | 6739  | 55.88009994 |
| NM_024341    | 0.27867479  | 1.732544576 | 6000  | 55.87361048 |
| NM_001256959 | 0.255646189 | 3.5078125   | 5631  | 55.85630203 |
| NM_001142295 | 0.205817594 | 2.070764254 | 4945  | 55.84745791 |
| NR_034164    | 0.219597153 | 1.954314721 | 5121  | 55.84653504 |
| NM_006662    | 0.454323764 | 9.413500095 | 10473 | 55.84323799 |
| NM_182909    | 0.112724013 | 1.303886926 | 3961  | 55.84202375 |
| NM_053042    | 0.329484608 | 2.539215686 | 6935  | 55.83827389 |
| NM_001178113 | 0.103373854 | 1.19670018  | 3878  | 55.83612892 |
| NM_001164317 | 0.429001706 | 8.365899582 | 9559  | 55.82658234 |
| NM_001199917 | 0.293362338 | 2.667894905 | 6241  | 55.82437532 |
| NM_033405    | 0.355667863 | 3.810710004 | 7506  | 55.82311578 |
| NM_001044388 | 0.278077457 | 1.733946488 | 5979  | 55.82193413 |
| NM_134442    | 0.435522313 | 4.671950097 | 9778  | 55.81768182 |
| NM_001097634 | 0.277835932 | 2.281386006 | 5973  | 55.81258441 |
| NM_001079906 | 0.131789718 | 1.266279351 | 4130  | 55.79559977 |
| NM_001142296 | 0.210831154 | 2.005002001 | 4997  | 55.78592092 |
| NM_033020    | 0.387211996 | 6.150820463 | 8287  | 55.7839065  |
| NM_015203    | 0.369115915 | 5.423381939 | 7817  | 55.77885918 |
| NM_007351    | 0.208708745 | 1.169249346 | 4968  | 55.77340503 |
| NM_001184786 | 0.277775153 | 3.585877222 | 5961  | 55.76118396 |
| NM_000212    | 0.20292771  | 2.739681242 | 4893  | 55.75519242 |
| NM_015049    | 0.309914106 | 3.821051019 | 6526  | 55.74766538 |
| NM_013386    | 0.068892029 | 1.779916318 | 3584  | 55.74219227 |
| NM_001044387 | 0.28022644  | 1.718149942 | 5988  | 55.69763891 |
| NM_005650    | 0.35290959  | 6.492507088 | 7406  | 55.68738408 |
| NM_001135937 | 0.455470845 | 4.3552556   | 10445 | 55.65130586 |
| NM_001085411 | 0.106667658 | 1.279567122 | 3880  | 55.64535537 |
| NM_015072    | 0.193255262 | 2.878074417 | 4756  | 55.63614936 |
| NM_001193363 | 0.221506117 | 1.92226356  | 5106  | 55.62827714 |
| NM_001256425 | 0.264151387 | 2.765272186 | 5712  | 55.61380054 |
| NM_001080453 | 0.334077338 | 8.280613708 | 6973  | 55.60753287 |
| NM_020429    | 0.267599899 | 2.29724102  | 5762  | 55.59490888 |
| NM_207352    | 0.189342466 | 1.151147959 | 4703  | 55.5936147  |
| NM_001201329 | 0.264321254 | 1.287865523 | 5710  | 55.59122743 |
| NM_020819    | 0.256696864 | 1.753128352 | 5593  | 55.58893772 |
| NM_014781    | 0.319215415 | 3.739463027 | 6666  | 55.58304924 |
| NM_018328    | 0.283327611 | 2.376329787 | 6015  | 55.58255275 |
| NM_020453    | 0.313249271 | 4.430076336 | 6549  | 55.57591534 |
| NM_001457    | 0.429133752 | 8.46889194  | 9466  | 55.5415015  |
| NM_016169    | 0.21045932  | 1.46301536  | 4947  | 55.5322751  |
| NM_001085462 | 0.286337281 | 2.70923509  | 6052  | 55.5191067  |

|                   |             |             |       |             |
|-------------------|-------------|-------------|-------|-------------|
| NM_001243765      | 0.329522404 | 3.541131855 | 6855  | 55.51214384 |
| NM_004938         | 0.279587746 | 5.936679017 | 5937  | 55.50915493 |
| NM_001083617      | 0.319737847 | 3.764043256 | 6657  | 55.50288881 |
| NM_015227         | 0.200874463 | 1.461745801 | 4822  | 55.49177444 |
| NM_004016         | 0.181028297 | 2.375952951 | 4590  | 55.48495514 |
| NM_001171992      | 0.078209795 | 1.609439691 | 3622  | 55.4761498  |
| TCONS_00015262    | 0.303038459 | 3.810200537 | 6332  | 55.45992358 |
| NM_022841         | 0.346261496 | 6.572897846 | 7194  | 55.44843358 |
| NM_020774         | 0.425310673 | 5.448205459 | 9305  | 55.43592781 |
| ENST00000457356.4 | 0.146956844 | 1.254265403 | 4219  | 55.40841991 |
| NM_015599         | 0.291010967 | 2.7463151   | 6105  | 55.39650318 |
| NM_032450         | 0.243841921 | 3.1318292   | 5362  | 55.37018846 |
| NM_001040716      | 0.144791348 | 1.128816794 | 4191  | 55.3644406  |
| NM_181492         | 0.351147222 | 6.63662591  | 7278  | 55.35440586 |
| NM_017902         | 0.334417171 | 5.096209491 | 6911  | 55.33151429 |
| NR_033651         | 0.146962754 | 1.258141193 | 4206  | 55.32260583 |
| NM_004799         | 0.210820239 | 1.719226857 | 4914  | 55.32144492 |
| NM_001085469      | 0.266783938 | 2.773893183 | 5691  | 55.31287893 |
| NM_001256550      | 0.245544158 | 2.452008929 | 5375  | 55.312471   |
| NM_001253799      | 0.138088699 | 1.253945132 | 4118  | 55.31026588 |
| NM_001144989      | 0.302293128 | 1.702053159 | 6282  | 55.299597   |
| NM_003565         | 0.234683186 | 2.041171965 | 5221  | 55.2991049  |
| NM_001252100      | 0.445329113 | 6.697283702 | 9939  | 55.29765528 |
| NM_001199399      | 0.246784398 | 2.519858946 | 5387  | 55.28315179 |
| NM_001164318      | 0.430871266 | 8.470426118 | 9433  | 55.27585006 |
| NM_001256523      | 0.10996419  | 1.384136858 | 3857  | 55.27545169 |
| NM_001193360      | 0.221092135 | 1.996621622 | 5031  | 55.24757855 |
| NR_027830         | 0.28154442  | 2.761711483 | 5912  | 55.24171268 |
| NM_001242761      | 0.079220124 | 1.317032509 | 3598  | 55.23144408 |
| NM_001253798      | 0.142595678 | 1.206796819 | 4148  | 55.22109858 |
| NM_001024596      | 0.250146514 | 1.490311866 | 5418  | 55.19451416 |
| NM_213590         | 0.353545567 | 2.276268861 | 7289  | 55.19146134 |
| NM_001206888      | 0.284116061 | 2.886103634 | 5943  | 55.18810528 |
| NM_017596         | 0.44549936  | 6.747702252 | 9900  | 55.17211705 |
| NM_000857         | 0.032201597 | 2.019390582 | 3248  | 55.15601886 |
| NM_014641         | 0.357396984 | 9.781080347 | 7367  | 55.15540713 |
| NM_001161563      | 0.265701018 | 13.57489807 | 5640  | 55.14580468 |
| NM_015042         | 0.405929813 | 6.040153186 | 8616  | 55.14302711 |
| NM_002841         | 0.323645043 | 3.229091456 | 6647  | 55.14263522 |
| NM_001161564      | 0.264235365 | 13.52679366 | 5616  | 55.13818409 |
| NM_004379         | 0.441220071 | 4.680805176 | 9736  | 55.13546995 |
| NM_002223         | 0.508534628 | 14.41359007 | 12567 | 55.09456151 |
| NM_199050         | 0.27941223  | 2.415497776 | 5845  | 55.09080829 |
| NM_001161779      | 0.165673243 | 1.150917431 | 4359  | 55.08452468 |
| NM_001195684      | 0.305998119 | 2.097142857 | 6299  | 55.08031959 |
| NM_025135         | 0.216593712 | 3.913597734 | 4941  | 55.06738839 |
| NM_173354         | 0.197073888 | 1.507335743 | 4702  | 55.0575516  |
| NM_001265611      | 0.311787679 | 2.79065771  | 6400  | 55.05698564 |
| NM_170589         | 0.371989192 | 7.482238126 | 7684  | 55.05044019 |
| NM_181671         | 0.310131604 | 3.377414795 | 6366  | 55.04267941 |
| NM_001126240      | 0.230771659 | 4.10390625  | 5119  | 55.03612415 |
| NM_001609         | 0.286086101 | 3.294226561 | 5940  | 55.02234046 |
| NM_001077692      | 0.312945354 | 3.204864359 | 6413  | 55.02016655 |
| NM_001253800      | 0.138364615 | 1.264345267 | 4077  | 55.01661695 |
| NM_017877         | 0.120269396 | 2.062116564 | 3911  | 55.01658237 |
| NM_001184787      | 0.283675867 | 3.53924394  | 5898  | 55.01257417 |
| NM_001164319      | 0.432421205 | 8.585524215 | 9394  | 55.01124069 |
| NM_014701         | 0.344764234 | 4.18477489  | 7040  | 54.9773655  |

|              |              |             |       |             |
|--------------|--------------|-------------|-------|-------------|
| NM_153013    | 0.089134768  | 1.232839099 | 3641  | 54.9622451  |
| NM_001031681 | 0.135469832  | 1.370113805 | 4041  | 54.95719749 |
| NM_001127208 | 0.444309709  | 7.071574642 | 9779  | 54.9515608  |
| NM_001206889 | 0.294282047  | 2.804057397 | 6062  | 54.94638585 |
| NM_001040445 | 0.335462795  | 3.185130982 | 6832  | 54.92792957 |
| NM_013229    | 0.35076157   | 4.133417156 | 7157  | 54.92495726 |
| NM_005160    | 0.422874574  | 6.045057979 | 9054  | 54.91493236 |
| NM_002015    | 0.275325253  | 4.081038689 | 5737  | 54.88902957 |
| NM_001206891 | 0.299236887  | 2.647816167 | 6135  | 54.88814036 |
| NM_001193489 | 0.352012091  | 4.259476031 | 7175  | 54.88805672 |
| NM_175872    | 0.119722884  | 1.166152263 | 3887  | 54.88158963 |
| NM_020772    | 0.473995807  | 7.521783088 | 10879 | 54.86352334 |
| NM_000651    | 0.450496088  | 3.76730885  | 9965  | 54.85414372 |
| NM_001199918 | 0.286234126  | 2.495257453 | 5903  | 54.839334   |
| NM_015139    | 0.317735023  | 3.075696594 | 6459  | 54.83220623 |
| NM_024607    | 0.264813899  | 1.333453173 | 5562  | 54.82930995 |
| NM_002451    | 0.218372882  | 3.007925218 | 4920  | 54.82544555 |
| NM_015447    | 0.372492534  | 4.655353165 | 7630  | 54.81269633 |
| NM_001142294 | 0.210858519  | 2.074450436 | 4821  | 54.79279297 |
| NM_152259    | 0.328995459  | 4.22117259  | 6668  | 54.7927698  |
| NM_001144068 | 0.24708634   | 1.526057402 | 5295  | 54.78708056 |
| NM_032156    | 0.185723388  | 1.423552806 | 4525  | 54.77485706 |
| NM_005239    | 0.107314236  | 1.40876494  | 3764  | 54.767563   |
| NM_001193361 | 0.221508674  | 1.979789814 | 4947  | 54.75511979 |
| NM_173602    | 0.413577078  | 7.269076305 | 8714  | 54.74188087 |
| NM_001256524 | 0.102029532  | 1.443487621 | 3715  | 54.73201824 |
| NM_002536    | 0.113412734  | 2.65818468  | 3811  | 54.73195529 |
| NM_015428    | 0.200720552  | 1.753518124 | 4689  | 54.73167791 |
| NM_001085466 | 0.280299062  | 2.607921135 | 5781  | 54.72094052 |
| NM_001077691 | 0.317842933  | 3.190831391 | 6434  | 54.71733173 |
| NM_001042573 | 0.183819499  | 1.647752559 | 4493  | 54.70845171 |
| NM_031281    | 0.25489372   | 2.062894249 | 5389  | 54.69810938 |
| NM_144508    | 0.372828221  | 7.611410543 | 7606  | 54.69714629 |
| NM_022574    | 0.312487002  | 4.620635171 | 6328  | 54.6907839  |
| NM_022572    | -0.000799332 | 1.132574489 | 2986  | 54.68798331 |
| NM_153371    | 0.211097632  | 1.738551207 | 4803  | 54.67383691 |
| NM_014662    | 0.259895785  | 3.165628435 | 5457  | 54.67261599 |
| NM_001178095 | 0.37029515   | 5.190735333 | 7533  | 54.65388287 |
| NM_001033087 | 0.178277939  | 1.332730561 | 4423  | 54.64915061 |
| NM_144778    | 0.205173601  | 2.346023689 | 4727  | 54.64684388 |
| NM_001195388 | 0.255009845  | 2.058550186 | 5379  | 54.63881929 |
| NR_027673    | 0.231669489  | 3.642207278 | 5055  | 54.62716467 |
| NM_001256651 | 0.236735453  | 1.237992971 | 5121  | 54.62009838 |
| NM_001161565 | 0.267078173  | 13.7374865  | 5553  | 54.61620152 |
| NM_001161566 | 0.265611599  | 13.68933092 | 5529  | 54.60709884 |
| NM_001243764 | 0.309151438  | 3.306978233 | 6247  | 54.60326485 |
| NM_012417    | 0.309323323  | 3.043533931 | 6247  | 54.58967938 |
| NM_001083953 | 0.313666454  | 4.283275371 | 6325  | 54.58401669 |
| NM_001003652 | 0.468276964  | 4.701404708 | 10535 | 54.57613117 |
| NM_001146009 | 0.065873992  | 2.128002343 | 3413  | 54.57246966 |
| NM_001195605 | 0.224262528  | 2.078803799 | 4948  | 54.56694199 |
| NM_001085468 | 0.281244278  | 2.605308813 | 5763  | 54.56392774 |
| NM_001160308 | 0.272235489  | 1.729359431 | 5619  | 54.55321999 |
| NM_018444    | 0.165921606  | 1.175315568 | 4277  | 54.54770671 |
| NM_001178085 | 0.380166195  | 5.228940568 | 7739  | 54.52776311 |
| NM_001002259 | 0.18582937   | 1.433890747 | 4484  | 54.51904423 |
| NM_001128626 | 0.26145514   | 1.62435709  | 5443  | 54.48739523 |
| NM_001031617 | 0.220822346  | 1.55121652  | 4890  | 54.48675178 |

|                   |             |             |       |             |
|-------------------|-------------|-------------|-------|-------------|
| NM_005277         | 0.03828236  | 5.852959502 | 3209  | 54.47941563 |
| NM_001012968      | 0.150406106 | 2.08438716  | 4111  | 54.47348003 |
| NM_213651         | 0.078606997 | 1.722254005 | 3495  | 54.47139528 |
| NM_001085464      | 0.287899804 | 2.508460092 | 5850  | 54.46519192 |
| NM_032859         | 0.252011644 | 2.484156922 | 5301  | 54.45951127 |
| NM_022802         | 0.210151632 | 1.04229798  | 4751  | 54.44227192 |
| NM_001244766      | 0.352900034 | 3.612971598 | 7076  | 54.43337835 |
| ENST00000570137.1 | 0.198569808 | 1.993281318 | 4613  | 54.43239287 |
| NM_015306         | 0.476287133 | 8.118774301 | 10801 | 54.42835731 |
| NM_006670         | 0.065199853 | 1.365378944 | 3390  | 54.42752938 |
| ENST00000454337.1 | 0.254604002 | 2.580172738 | 5325  | 54.39348218 |
| NM_001206890      | 0.284974159 | 2.334427929 | 5785  | 54.38428446 |
| NM_181349         | 0.278708641 | 2.402286719 | 5684  | 54.37981978 |
| NM_001267584      | 0.174518204 | 1.306912442 | 4339  | 54.37538257 |
| NR_037882         | 0.284234986 | 2.878551629 | 5771  | 54.37459107 |
| NR_026947         | 0.251208835 | 2.489188164 | 5271  | 54.36347622 |
| ENST00000541775.1 | 0.251208835 | 2.489188164 | 5271  | 54.36347622 |
| NM_005399         | 0.261762417 | 2.012723585 | 5422  | 54.35955682 |
| NM_006371         | 0.333411044 | 2.269433168 | 6650  | 54.3586843  |
| NM_181861         | 0.359052449 | 4.242247254 | 7190  | 54.34842188 |
| NM_001146190      | 0.273668879 | 2.003394069 | 5597  | 54.33908312 |
| NM_003112         | 0.286532176 | 4.419655172 | 5799  | 54.3314063  |
| NM_004018         | 0.19464909  | 2.12741652  | 4551  | 54.32985816 |
| NM_001199847      | 0.278894089 | 2.395348837 | 5675  | 54.3227802  |
| NR_046474         | 0.169690736 | 2.72763373  | 4280  | 54.320251   |
| NM_017742         | 0.270374379 | 2.804979253 | 5542  | 54.31669503 |
| NR_037596         | 0.217402738 | 1.789331673 | 4817  | 54.3158584  |
| NM_015291         | 0.300210523 | 2.585726141 | 6024  | 54.31376254 |
| NM_001102653      | 0.353912268 | 3.519949066 | 7067  | 54.31365635 |
| NM_015282         | 0.396184365 | 9.033366288 | 8091  | 54.31320801 |
| NM_001171689      | 0.274442024 | 2.629371877 | 5603  | 54.31032879 |
| NM_001204189      | 0.210974034 | 3.72351203  | 4737  | 54.30539635 |
| NM_005895         | 0.435405491 | 8.069390402 | 9251  | 54.30389617 |
| NM_001161778      | 0.165468399 | 1.180873672 | 4234  | 54.30229862 |
| NM_001126242      | 0.229803832 | 3.839267753 | 4970  | 54.2974642  |
| NM_015197         | 0.334062219 | 2.170702361 | 6648  | 54.29741571 |
| NM_017709         | 0.282186252 | 2.20034965  | 5719  | 54.28399733 |
| NM_001193329      | 0.030522003 | 1.288584184 | 3135  | 54.28211111 |
| NM_153246         | 0.092651498 | 1.636871508 | 3579  | 54.28189191 |
| NM_017762         | 0.229446955 | 2.744003225 | 4960  | 54.26794537 |
| NM_001161780      | 0.165899751 | 1.184695324 | 4233  | 54.26782117 |
| NM_014948         | 0.176662959 | 1.315765247 | 4344  | 54.26534429 |
| NM_001085461      | 0.313371924 | 2.503602882 | 6244  | 54.25665369 |
| NM_025180         | 0.302693518 | 2.166336307 | 6053  | 54.25116129 |
| NM_001131062      | 0.305532588 | 1.769419862 | 6101  | 54.24408447 |
| NM_001006656      | 0.197375434 | 1.796847636 | 4567  | 54.24103327 |
| NM_014071         | 0.35460093  | 5.395355423 | 7061  | 54.23272675 |
| NM_001242896      | 0.272038777 | 3.060169339 | 5550  | 54.2318897  |
| NM_001161781      | 0.165174598 | 1.18336887  | 4220  | 54.23153298 |
| NM_001195677      | 0.376912918 | 2.80781415  | 7575  | 54.23005763 |
| NM_000484         | 0.100284969 | 11.1255161  | 3632  | 54.22229504 |
| NM_001085463      | 0.292202315 | 2.697904243 | 5868  | 54.21933547 |
| NM_033360         | 0.263539853 | 3.253274304 | 5420  | 54.21867421 |
| ENST00000431979.1 | 0.085604525 | 1.060864619 | 3515  | 54.21216267 |
| NM_001079907      | 0.158503321 | 1.161647796 | 4150  | 54.20963142 |
| NM_130466         | 0.284715813 | 4.023850975 | 5743  | 54.2060838  |
| NM_020448         | 0.264196703 | 1.914670107 | 5425  | 54.19529699 |
| NM_001134367      | 0.327988984 | 4.592404674 | 6503  | 54.1917617  |

|                   |             |             |       |             |
|-------------------|-------------|-------------|-------|-------------|
| NM_001204191      | 0.220355373 | 3.896937086 | 4831  | 54.18950812 |
| TCONS_00023419    | 0.267736973 | 2.308436815 | 5475  | 54.18251602 |
| ENST00000426361.2 | 0.249336752 | 1.069865643 | 5209  | 54.17792056 |
| NM_020824         | 0.360150945 | 6.178038231 | 7166  | 54.16464918 |
| NM_153810         | 0.340201712 | 4.749851632 | 6739  | 54.16377339 |
| NM_033449         | 0.175854017 | 1.606712963 | 4319  | 54.16213164 |
| ENST00000369151.2 | 0.340261412 | 4.749703264 | 6739  | 54.15887253 |
| NM_022347         | 0.356209927 | 3.297992649 | 7073  | 54.14347241 |
| NM_152551         | 0.161871555 | 2.000718907 | 4172  | 54.135572   |
| NM_201274         | 0.484524088 | 8.123559829 | 11022 | 54.11760632 |
| NM_001257180      | 0.143602087 | 1.194291437 | 3993  | 54.11594607 |
| NM_001160         | 0.354641916 | 4.076824584 | 7028  | 54.10241244 |
| NM_001194999      | 0.38440931  | 4.083624595 | 7724  | 54.10198198 |
| NM_000920         | 0.144990821 | 1.17982018  | 4003  | 54.09580302 |
| NM_000118         | 0.042986717 | 1.197121402 | 3195  | 54.09453561 |
| NR_039983         | 0.269007125 | 4.707161125 | 5473  | 54.07865331 |
| NM_022065         | 0.308361568 | 4.46401701  | 6113  | 54.07621867 |
| NM_005085         | 0.33440617  | 7.266323284 | 6600  | 54.07309839 |
| NM_001130140      | 0.254091849 | 2.709118599 | 5252  | 54.0564737  |
| NR_027674         | 0.230842812 | 3.574929121 | 4937  | 54.04389815 |
| NM_001024956      | 0.354938102 | 4.043880895 | 7018  | 54.03909563 |
| NM_001166417      | 0.30376195  | 1.779917012 | 6024  | 54.03812056 |
| NM_032823         | 0.000250371 | 1.251540041 | 2921  | 54.03274485 |
| NM_001145276      | 0.21599419  | 1.382315789 | 4749  | 54.02818349 |
| NM_020148         | 0.264953488 | 1.71325435  | 5401  | 54.01966786 |
| NM_001077690      | 0.310590082 | 3.327195698 | 6136  | 54.00328796 |
| NM_001078         | 0.045872585 | 1.258507649 | 3202  | 53.99046136 |
| NM_032217         | 0.442472985 | 10.69696    | 9374  | 53.97944192 |
| NM_201592         | 0.038242234 | 5.987940336 | 3150  | 53.97852072 |
| NM_014661         | 0.287594118 | 3.674912892 | 5739  | 53.9691538  |
| NM_001184         | 0.405903611 | 5.776148346 | 8250  | 53.96148424 |
| NM_001754         | 0.301663439 | 3.060331825 | 5966  | 53.93943644 |
| NM_001204185      | 0.236681079 | 4.570284341 | 4993  | 53.93700294 |
| NM_207304         | 0.204437323 | 2.432020883 | 4596  | 53.93422098 |
| NR_026677         | 0.30274078  | 2.487967914 | 5983  | 53.93289923 |
| NM_016006         | 0.262916569 | 1.412292173 | 5352  | 53.9230813  |
| NM_001172774      | 0.303990061 | 4.467344219 | 6001  | 53.91719059 |
| NR_046462         | 0.301161324 | 2.624727028 | 5952  | 53.914849   |
| NM_207325         | 0.305529026 | 4.450066357 | 6027  | 53.91438986 |
| NM_201413         | 0.098378572 | 11.52824385 | 3575  | 53.90912063 |
| NM_020165         | 0.288428901 | 3.650984492 | 5738  | 53.90121718 |
| NM_001135037      | 0.204258375 | 2.678291194 | 4587  | 53.89350712 |
| NM_052948         | 0.13889591  | 1.096477795 | 3917  | 53.89300968 |
| NM_001136265      | 0.29447044  | 2.315681234 | 5834  | 53.88878933 |
| NM_001114118      | 0.404360183 | 3.673998045 | 8183  | 53.8815397  |
| NM_018374         | 0.332486891 | 2.768038072 | 6513  | 53.87041706 |
| NM_015041         | 0.16316465  | 1.351025332 | 4144  | 53.87036163 |
| NM_006209         | 0.059103108 | 3.156802929 | 3277  | 53.86172454 |
| NM_006749         | 0.143810695 | 1.194844579 | 3956  | 53.85151678 |
| NM_001097636      | 0.280902879 | 2.417692171 | 5606  | 53.84112142 |
| NM_006918         | 0.354067165 | 4.132738267 | 6945  | 53.8298893  |
| NM_006298         | 0.264873418 | 3.663931369 | 5361  | 53.82512294 |
| NM_181839         | 0.156452464 | 1.179027505 | 4071  | 53.82203475 |
| NM_003410         | 0.382829906 | 5.309836928 | 7603  | 53.81425949 |
| NM_017628         | 0.439955315 | 3.287230586 | 9232  | 53.81093993 |
| NM_015662         | 0.264941004 | 1.511567164 | 5359  | 53.81013422 |
| NM_014060         | 0.45622604  | 3.300480033 | 9790  | 53.80340389 |
| NM_173468         | 0.355362768 | 3.716008615 | 6964  | 53.79535358 |

|                   |             |             |       |             |
|-------------------|-------------|-------------|-------|-------------|
| NM_001204190      | 0.229635189 | 3.73692844  | 4876  | 53.79331209 |
| NM_144710         | 0.057172665 | 8.026412776 | 3255  | 53.7907577  |
| NM_015134         | 0.486187159 | 8.309580292 | 10959 | 53.78862181 |
| NM_018199         | 0.204118754 | 1.935639229 | 4567  | 53.78532251 |
| NM_001131063      | 0.310780156 | 1.757351733 | 6086  | 53.76798323 |
| NM_014952         | 0.200713928 | 3.673221388 | 4525  | 53.76647158 |
| NM_182898         | 0.417903335 | 7.919596812 | 8531  | 53.76443445 |
| NM_080676         | 0.228923867 | 1.14973262  | 4861  | 53.76010045 |
| ENST00000562490.1 | 0.059199293 | 1.04592774  | 3265  | 53.75752033 |
| NM_020714         | 0.311579892 | 1.748278124 | 6097  | 53.75410614 |
| NM_007324         | 0.219006295 | 1.713803293 | 4737  | 53.75256906 |
| NM_007219         | 0.072316685 | 1.054496724 | 3357  | 53.74962225 |
| NM_080682         | 0.006358453 | 1.163990434 | 2926  | 53.74856864 |
| NM_001172655      | 0.277705188 | 1.581979054 | 5537  | 53.74669422 |
| NM_015132         | 0.326633069 | 2.287709936 | 6370  | 53.74294991 |
| NM_022172         | 0.1459627   | 1.173528669 | 3958  | 53.72973935 |
| NM_001136029      | 0.267604468 | 3.116127834 | 5381  | 53.72509379 |
| NM_007118         | 0.468773    | 10.50924025 | 10226 | 53.71963266 |
| NM_001256525      | 0.106558471 | 1.442477876 | 3615  | 53.71805583 |
| NM_024740         | 0.315440901 | 3.312114323 | 6157  | 53.71499309 |
| NM_001080485      | 0.324348717 | 3.823892405 | 6319  | 53.70896504 |
| NM_017813         | 0.368306372 | 4.554771784 | 7229  | 53.70881971 |
| NM_001204301      | 0.102167921 | 10.66471081 | 3578  | 53.70506996 |
| NM_199415         | 0.169582241 | 1.28448482  | 4182  | 53.7017752  |
| NM_001821         | 0.361195714 | 3.792810643 | 7065  | 53.6937708  |
| NM_001206886      | 0.308586964 | 2.446360471 | 6030  | 53.69034808 |
| NM_001433         | 0.151578218 | 1.807490637 | 4004  | 53.68572768 |
| NR_027687         | 0.258134789 | 1.058081773 | 5233  | 53.6661417  |
| NM_001003699      | 0.425755394 | 4.950646971 | 8732  | 53.6603855  |
| NM_014963         | 0.235293596 | 4.579492386 | 4924  | 53.66038066 |
| NM_015205         | 0.427831806 | 8.594997157 | 8794  | 53.6558332  |
| NM_003736         | 0.206978946 | 1.177370031 | 4577  | 53.65067297 |
| NM_001243127      | 0.315795303 | 2.191575866 | 6148  | 53.6479314  |
| NM_001136016      | 0.100426168 | 11.25892606 | 3556  | 53.6435721  |
| NR_024084         | 0.322469341 | 1.972563407 | 6268  | 53.64057765 |
| NM_001100913      | 0.344458811 | 2.077532118 | 6693  | 53.63032106 |
| NM_015230         | 0.374927328 | 4.483020918 | 7361  | 53.62890396 |
| NM_032189         | 0.42724483  | 8.616560219 | 8767  | 53.62836068 |
| NR_038177         | 0.191344824 | 1.466242328 | 4398  | 53.62792374 |
| NM_001876         | 0.260136422 | 3.082238721 | 5252  | 53.61841935 |
| NM_015365         | 0.271504386 | 2.765922097 | 5416  | 53.61252591 |
| NM_001261448      | 0.038368622 | 5.958829206 | 3108  | 53.6104103  |
| NM_003043         | 0.335449818 | 4.700061463 | 6507  | 53.60659035 |
| NM_002731         | 0.201972382 | 1.711721693 | 4512  | 53.6046503  |
| NM_001097635      | 0.278098556 | 2.448132028 | 5513  | 53.60087841 |
| NM_001204192      | 0.238360693 | 4.201695942 | 4952  | 53.59689952 |
| NM_005427         | 0.252828148 | 4.720007778 | 5142  | 53.578005   |
| NM_001206885      | 0.32294164  | 2.556602267 | 6262  | 53.57752367 |
| NM_021964         | 0.451588965 | 5.388871424 | 9542  | 53.57052355 |
| NM_182948         | 0.200020647 | 1.681463306 | 4482  | 53.55681039 |
| NM_004612         | 0.334385841 | 3.860055607 | 6473  | 53.55195814 |
| NM_001025580      | 0.264804598 | 2.706181681 | 5305  | 53.5482739  |
| NM_001007278      | 0.357914057 | 2.291486914 | 6953  | 53.54011222 |
| NM_033397         | 0.189511554 | 2.331805683 | 4363  | 53.53520062 |
| NM_001244189      | 0.310815564 | 3.324825986 | 6033  | 53.53060158 |
| NM_181868         | 0.3630615   | 4.187765506 | 7061  | 53.52178712 |
| NM_001105537      | 0.304545181 | 4.264606552 | 5921  | 53.51388133 |
| NM_002335         | 0.252749208 | 4.343603744 | 5127  | 53.5054527  |

|                   |             |             |       |             |
|-------------------|-------------|-------------|-------|-------------|
| NM_015910         | 0.069953318 | 1.01783016  | 3308  | 53.49183521 |
| NM_014021         | 0.30338398  | 1.821434628 | 5896  | 53.48995035 |
| NM_020945         | 0.465473188 | 13.60291621 | 10012 | 53.48474322 |
| NM_017728         | 0.223834405 | 1.979574647 | 4748  | 53.48225901 |
| NM_018718         | 0.335883919 | 2.577397471 | 6485  | 53.4809344  |
| NM_004091         | 0.257798708 | 3.047178895 | 5192  | 53.47971053 |
| NM_001137554      | 0.454241693 | 3.019993752 | 9602  | 53.47874488 |
| NM_023076         | 0.167408101 | 1.849660524 | 4123  | 53.46121792 |
| NM_001003700      | 0.399894149 | 4.604662886 | 7934  | 53.45323069 |
| NM_013450         | 0.407691862 | 4.345979128 | 8144  | 53.45232274 |
| NM_004985         | 0.26602421  | 3.351519728 | 5296  | 53.41407638 |
| ENST00000344707.2 | 0.078330984 | 1.41947008  | 3358  | 53.40910913 |
| NM_001008388      | 0.304101603 | 2.63265999  | 5890  | 53.40765178 |
| NR_027686         | 0.263821383 | 1.164893617 | 5263  | 53.4072091  |
| NM_000443         | 0.151955083 | 1.114948324 | 3966  | 53.40663444 |
| NM_152778         | 0.207850244 | 1.84950495  | 4544  | 53.39817987 |
| NM_001204302      | 0.100160157 | 11.06615559 | 3521  | 53.39470991 |
| NM_006823         | 0.176200492 | 1.236848369 | 4200  | 53.38830998 |
| NR_003561         | 0.122512186 | 2.006219578 | 3697  | 53.35385687 |
| NM_144718         | 0.27722842  | 1.729258443 | 5447  | 53.34328478 |
| NM_002293         | 0.399631744 | 7.569907466 | 7888  | 53.32135439 |
| NM_001115008      | 0.278600665 | 2.700219619 | 5463  | 53.32014696 |
| NM_001114753      | 0.036126661 | 1.329084967 | 3059  | 53.31012566 |
| NM_015313         | 0.462264707 | 8.117000712 | 9828  | 53.30907113 |
| NM_018849         | 0.155914902 | 1.114844534 | 3987  | 53.29780835 |
| NM_023072         | 0.190865178 | 1.894445725 | 4338  | 53.29244747 |
| NM_052811         | 0.355667852 | 2.378508772 | 6839  | 53.28513894 |
| NM_001134338      | 0.071881009 | 1.084622384 | 3296  | 53.28405412 |
| NM_014729         | 0.17089688  | 3.458000484 | 4130  | 53.28237503 |
| NM_001127183      | 0.483718552 | 7.677401183 | 10650 | 53.27964512 |
| NM_033224         | 0.440522152 | 5.335428382 | 9068  | 53.27686381 |
| NM_003423         | 0.265247095 | 1.295549639 | 5257  | 53.2733859  |
| NM_005901         | 0.478435515 | 4.908707326 | 10427 | 53.25834888 |
| NM_001252102      | 0.448546221 | 7.228657229 | 9323  | 53.24599648 |
| NM_001134232      | 0.33017814  | 2.915822785 | 6319  | 53.24557173 |
| NM_014709         | 0.499335255 | 11.93094607 | 11309 | 53.24258259 |
| NM_003735         | 0.229357836 | 1.422077922 | 4773  | 53.24127953 |
| NM_001085467      | 0.303244909 | 2.682713723 | 5836  | 53.22771128 |
| NM_024652         | 0.390753993 | 7.009435199 | 7630  | 53.21756026 |
| NM_178584         | 0.057316009 | 7.971760276 | 3186  | 53.20948033 |
| NM_015040         | 0.465284972 | 7.959499041 | 9900  | 53.20347352 |
| NM_001242377      | 0.470529737 | 7.315664322 | 10092 | 53.19002496 |
| NM_001166293      | 0.304605724 | 1.836497349 | 5846  | 53.16924789 |
| NM_012288         | 0.367082077 | 5.375513674 | 7056  | 53.16510555 |
| NR_037928         | 0.32943487  | 3.424025457 | 6284  | 53.15682761 |
| NM_023925         | 0.192653397 | 1.433910035 | 4334  | 53.15014771 |
| NM_001130863      | 0.059924293 | 3.21989365  | 3196  | 53.14546551 |
| NM_001206856      | 0.19523162  | 1.437514332 | 4360  | 53.13909439 |
| NM_001085465      | 0.301530797 | 2.258120249 | 5787  | 53.13418247 |
| NM_015325         | 0.404053196 | 6.148716658 | 7947  | 53.12624264 |
| NM_001252103      | 0.448702408 | 7.284652666 | 9284  | 53.11946122 |
| NM_004360         | 0.234519715 | 2.184215992 | 4814  | 53.1113148  |
| NM_003713         | 0.07648215  | 1.478839178 | 3307  | 53.10829898 |
| NM_001126241      | 0.250988892 | 3.950258655 | 5025  | 53.09532598 |
| NM_000152         | 0.135805021 | 1.230463576 | 3774  | 53.08999529 |
| NM_020801         | 0.177280913 | 1.648401826 | 4160  | 53.06378667 |
| NM_001136191      | 0.264653314 | 3.574884793 | 5207  | 53.06228261 |
| ENST00000369156.1 | 0.339822302 | 4.887770898 | 6459  | 53.05709792 |

|                   |              |             |       |             |
|-------------------|--------------|-------------|-------|-------------|
| NM_001178084      | 0.383101572  | 5.437939427 | 7395  | 53.04967808 |
| NM_006618         | 0.336011694  | 4.297822341 | 6382  | 53.04431319 |
| NM_173653         | 0.1192547    | 1.615660325 | 3626  | 53.03520283 |
| NM_003045         | 0.381192772  | 8.402424077 | 7342  | 53.02278896 |
| NM_017852         | 0.113102969  | 2.846993007 | 3574  | 53.02131259 |
| NM_001003698      | 0.427338232  | 5.013772176 | 8567  | 53.0044794  |
| NM_001166295      | 0.306530472  | 1.784699641 | 5842  | 53.00394061 |
| NM_015566         | 0.315101758  | 2.7         | 5989  | 53.0033364  |
| NM_152624         | 0.475231505  | 7.478819376 | 10197 | 52.99122552 |
| NM_032207         | 0.083857415  | 1.200239091 | 3345  | 52.98599961 |
| NM_001097633      | 0.284038504  | 2.505659    | 5477  | 52.98598803 |
| NM_004631         | 0.399229154  | 4.687966058 | 7777  | 52.98035923 |
| NM_181523         | 0.365609462  | 6.746236559 | 6974  | 52.97825735 |
| NM_001202516      | 0.483524107  | 7.22608861  | 10517 | 52.96585561 |
| NM_001253801      | 0.151535742  | 1.274967908 | 3894  | 52.94580132 |
| ENST00000453554.1 | -0.346960104 | 4.028460543 | 1545  | 52.94427117 |
| NM_015690         | 0.246339669  | 1.937183384 | 4934  | 52.93893854 |
| NM_002649         | 0.278149174  | 2.427960587 | 5378  | 52.93682094 |
| NM_006315         | 0.297048395  | 4.097440424 | 5664  | 52.90382208 |
| NM_015178         | 0.283350697  | 2.81299321  | 5448  | 52.89629234 |
| NM_030650         | 0.303309662  | 3.560104076 | 5764  | 52.89343522 |
| NM_001145798      | 0.400759368  | 4.338680698 | 7791  | 52.89295801 |
| NM_001198665      | 0.464979496  | 8.231784691 | 9771  | 52.88590409 |
| NM_001261462      | 0.210868939  | 1.357986188 | 4488  | 52.86589169 |
| NM_173654         | 0.178302014  | 1.588690188 | 4137  | 52.85121586 |
| ENST00000295571.5 | 0.178302014  | 1.588690188 | 4137  | 52.85121586 |
| NM_020338         | 0.391953013  | 10.3081403  | 7554  | 52.84764399 |
| NR_046443         | 0.339898869  | 2.471918877 | 6409  | 52.84520812 |
| NM_005798         | 0.35700097   | 2.418356773 | 6754  | 52.84341132 |
| NM_001712         | 0.109463777  | 1.378516624 | 3518  | 52.82013503 |
| NM_004958         | 0.434514829  | 7.771690544 | 8724  | 52.81764689 |
| NM_022041         | 0.216492903  | 1.295774648 | 4543  | 52.80977329 |
| NM_024896         | 0.277341802  | 3.530612245 | 5340  | 52.80846725 |
| NM_030792         | 0.062728436  | 1.406112161 | 3173  | 52.79593399 |
| NM_001104586      | 0.265759413  | 1.625797718 | 5170  | 52.79388952 |
| NM_001244192      | 0.302196883  | 3.403983925 | 5722  | 52.78455099 |
| NM_001134337      | 0.070931863  | 1.101610905 | 3227  | 52.77728543 |
| NM_001174081      | 0.113410405  | 2.859198646 | 3543  | 52.77256536 |
| NM_001974         | 0.05888218   | 1.286168521 | 3144  | 52.76977778 |
| NM_002538         | 0.34231659   | 3.880397639 | 6437  | 52.76654288 |
| NM_001001936      | 0.163071193  | 1.410714286 | 3975  | 52.76635354 |
| NM_182641         | 0.494903758  | 10.30685358 | 10913 | 52.76503306 |
| NM_012141         | 0.389333204  | 4.879035499 | 7464  | 52.75821848 |
| NM_001111307      | 0.236790775  | 2.57396945  | 4778  | 52.75537129 |
| NM_001160258      | 0.313414005  | 4.527208001 | 5898  | 52.72873161 |
| NM_001243313      | 0.244502182  | 1.929802956 | 4871  | 52.72811904 |
| NM_014997         | 0.342853456  | 3.603758931 | 6437  | 52.72346963 |
| NM_004090         | 0.178877508  | 1.860019408 | 4121  | 52.7111971  |
| NM_145754         | 0.075134501  | 1.058497537 | 3247  | 52.70110526 |
| NR_038352         | 0.470888843  | 7.287255495 | 9917  | 52.69107706 |
| NM_198269         | 0.373300258  | 5.261823846 | 7061  | 52.66142676 |
| NM_001168344      | 0.429997724  | 4.970698547 | 8531  | 52.64735542 |
| NM_001160226      | 0.312300652  | 4.548029347 | 5860  | 52.64382302 |
| TCONS_00011630    | 0.122147083  | 1.17264387  | 3596  | 52.64190514 |
| NM_001206887      | 0.318615392  | 2.498156836 | 5967  | 52.6344801  |
| NM_003185         | 0.226215706  | 2.874891962 | 4627  | 52.63439803 |
| TCONS_00023262    | 0.125408243  | 2.057150745 | 3621  | 52.62833643 |
| NM_001206884      | 0.318359343  | 2.65011741  | 5961  | 52.6277796  |



|                   |             |             |       |             |
|-------------------|-------------|-------------|-------|-------------|
| NM_001031672      | 0.114580417 | 1.48627229  | 3532  | 52.62104525 |
| NM_003879         | 0.489430829 | 7.609526499 | 10622 | 52.62083511 |
| NM_003714         | 0.280105535 | 1.52423732  | 5342  | 52.61635712 |
| NR_003521         | 0.121608701 | 1.013377926 | 3587  | 52.60823285 |
| NM_014712         | 0.344756698 | 4.484876687 | 6446  | 52.60750936 |
| NM_182899         | 0.418648648 | 8.024548119 | 8187  | 52.60185772 |
| NM_001204186      | 0.237606433 | 4.247427011 | 4760  | 52.59963126 |
| NM_001204172      | 0.448657932 | 4.862072755 | 9098  | 52.58890129 |
| NM_024632         | 0.333432369 | 2.037590361 | 6224  | 52.58707464 |
| NM_001018054      | 0.396844625 | 4.561505065 | 7600  | 52.58186653 |
| NM_020310         | 0.244291656 | 1.874845105 | 4841  | 52.58014249 |
| NM_001184998      | 0.403228216 | 6.237886598 | 7759  | 52.56675358 |
| NM_130446         | 0.33881257  | 7.555221519 | 6319  | 52.55920245 |
| NM_017631         | 0.325534709 | 3.696196279 | 6072  | 52.55638514 |
| NM_001166294      | 0.304873074 | 1.830446194 | 5714  | 52.54534275 |
| NM_001040092      | 0.059535016 | 3.353299167 | 3121  | 52.539933   |
| NM_153348         | 0.245892906 | 1.403501545 | 4854  | 52.53913426 |
| NM_000726         | 0.411763755 | 4.558661319 | 7977  | 52.53776299 |
| NM_025191         | 0.354837458 | 4.632689988 | 6631  | 52.53620018 |
| NM_001242897      | 0.268284729 | 3.162948594 | 5154  | 52.53083767 |
| NR_036633         | 0.40344963  | 2.990455308 | 7752  | 52.52354152 |
| NM_032550         | 0.165789853 | 1.406155399 | 3963  | 52.51549996 |
| NM_017766         | 0.208793068 | 1.329625426 | 4404  | 52.50658085 |
| NM_025114         | 0.411294755 | 3.616593338 | 7954  | 52.50379532 |
| NM_001099678      | 0.401066504 | 7.253546792 | 7682  | 52.4947357  |
| NM_001130723      | 0.262324846 | 1.953603159 | 5064  | 52.49428256 |
| NM_006720         | 0.365187701 | 7.743091095 | 6838  | 52.49402584 |
| ENST00000366686.1 | 0.208856746 | 1.477153899 | 4398  | 52.46657829 |
| NM_001136130      | 0.108563632 | 10.57056277 | 3464  | 52.46616125 |
| NM_001042549      | 0.543704557 | 1.915960666 | 13219 | 52.46207121 |
| NM_152734         | 0.36145736  | 5.368834247 | 6750  | 52.46163117 |
| NM_001160259      | 0.309981013 | 4.586941462 | 5773  | 52.42782245 |
| NM_015226         | 0.368404428 | 4.832244957 | 6890  | 52.42623717 |
| NM_152347         | 0.166049375 | 1.008607595 | 3949  | 52.4063491  |
| NM_005761         | 0.388515082 | 7.32875034  | 7345  | 52.40607694 |
| NM_004904         | 0.421793379 | 8.057835139 | 8212  | 52.39713379 |
| NM_018561         | 0.070287183 | 1.175952156 | 3176  | 52.39490596 |
| NM_001130720      | 0.263584082 | 1.959699723 | 5061  | 52.38914806 |
| NM_000136         | 0.226915231 | 1.706881533 | 4591  | 52.38184168 |
| NM_001193389      | 0.169104756 | 1.869652743 | 3973  | 52.37277133 |
| NM_183415         | 0.287171197 | 4.193739581 | 5398  | 52.37224714 |
| NM_153377         | 0.180008428 | 1.503431373 | 4079  | 52.37044225 |
| NM_001142273      | 0.411440944 | 9.477068857 | 7914  | 52.3586053  |
| NM_001146051      | 0.115279532 | 1.492435056 | 3502  | 52.35572114 |
| NM_001204187      | 0.252042239 | 4.169591837 | 4899  | 52.35170042 |
| NM_012121         | 0.059765387 | 1.386326991 | 3100  | 52.35004773 |
| NM_001001664      | 0.308622003 | 4.676839902 | 5733  | 52.34877516 |
| ENST00000296858.5 | 0.082893663 | 1.391958257 | 3257  | 52.33938    |
| NM_001251971      | 0.412585023 | 4.539420655 | 7939  | 52.33930072 |
| NM_001174082      | 0.116425633 | 2.669136506 | 3508  | 52.33267094 |
| NM_004606         | 0.403296414 | 6.241419657 | 7691  | 52.32991796 |
| NM_001204184      | 0.263503456 | 4.695583284 | 5048  | 52.3275482  |
| NM_001142274      | 0.410897879 | 9.535800279 | 7890  | 52.32739179 |
| NM_144607         | 0.144980837 | 1.382274426 | 3745  | 52.32409908 |
| NM_018390         | 0.281484145 | 3.509049774 | 5303  | 52.32354611 |
| NM_001174083      | 0.116242888 | 2.758984598 | 3505  | 52.32110806 |
| NM_018260         | 0.277523343 | 1.668382914 | 5243  | 52.31349652 |
| NM_203459         | 0.389881342 | 4.596653517 | 7350  | 52.3067788  |

|              |             |             |       |             |
|--------------|-------------|-------------|-------|-------------|
| NM_005442    | 0           | 1.280701754 | 2735  | 52.29722746 |
| NM_018850    | 0.154450886 | 1.126764245 | 3825  | 52.29432465 |
| NM_001128627 | 0.267735706 | 1.791960784 | 5099  | 52.28900336 |
| NM_001207051 | 0.412250609 | 9.620305981 | 7908  | 52.26675262 |
| NM_001160305 | 0.042272157 | 1.928163813 | 2978  | 52.26421842 |
| NR_046262    | 0.284438666 | 1.600674916 | 5333  | 52.25557816 |
| NM_001204188 | 0.250069824 | 4.188671473 | 4854  | 52.24812569 |
| NM_001243121 | 0.236958098 | 2.596928983 | 4688  | 52.2446939  |
| NM_017782    | 0.43748892  | 7.6978901   | 8625  | 52.24089797 |
| NM_001160036 | 0.279719933 | 2.737502376 | 5260  | 52.23892948 |
| NM_016936    | 0.35085799  | 6.272039524 | 6476  | 52.23879327 |
| NM_201414    | 0.105220907 | 10.6745892  | 3407  | 52.22781953 |
| NM_001242860 | 0.204191055 | 1.721680594 | 4307  | 52.22714099 |
| NM_014938    | 0.294305153 | 3.015157049 | 5475  | 52.21665025 |
| NM_001080542 | 0.15970491  | 1.518384257 | 3861  | 52.21337024 |
| NM_001199834 | 0.049331766 | 1.198541598 | 3016  | 52.20891297 |
| NM_015328    | 0.266366336 | 1.944126357 | 5064  | 52.20668293 |
| NM_152446    | 0.218001624 | 1.227282926 | 4456  | 52.20095425 |
| NM_001242857 | 0.204190483 | 1.724482678 | 4300  | 52.18471983 |
| NM_031463    | 0.138323663 | 1.613140676 | 3667  | 52.17946497 |
| NM_014873    | 0.408471138 | 7.361860704 | 7781  | 52.17874713 |
| NM_020177    | 0.315725928 | 3.675038706 | 5812  | 52.16664264 |
| NM_004283    | 0.201903148 | 1.729230049 | 4272  | 52.16404009 |
| NM_001242861 | 0.195031726 | 1.630952381 | 4199  | 52.16169574 |
| NM_001142864 | 0.410634645 | 9.206944976 | 7832  | 52.15800148 |
| NM_001171905 | 0.323439038 | 1.762746088 | 5942  | 52.15227512 |
| NM_016083    | 0.310266682 | 4.598286114 | 5717  | 52.15131956 |
| NM_014838    | 0.371536286 | 5.764449608 | 6885  | 52.14734234 |
| NM_001242859 | 0.204189746 | 1.728098788 | 4291  | 52.13012761 |
| NM_001005746 | 0.414519792 | 4.625378406 | 7927  | 52.12747009 |
| NM_024860    | 0.033022374 | 1.929480564 | 2906  | 52.12717997 |
| NM_001098402 | 0.397203633 | 3.570798235 | 7478  | 52.1270751  |
| NM_001256252 | 0.061867872 | 1.262305699 | 3087  | 52.12335045 |
| NM_001247996 | 0.345938054 | 3.509297195 | 6345  | 52.09963677 |
| NM_014647    | 0.408597911 | 6.263273196 | 7759  | 52.09376306 |
| NM_175876    | 0.270369773 | 2.907200314 | 5096  | 52.08558275 |
| NM_004573    | 0.238422694 | 2.236903998 | 4676  | 52.07763405 |
| NM_001008738 | 0.355528635 | 3.634150077 | 6529  | 52.07472194 |
| NM_181358    | 0.371766941 | 5.315674574 | 6870  | 52.07138806 |
| NM_032689    | 0.211898815 | 1.196608616 | 4363  | 52.05645467 |
| NM_001184999 | 0.408736166 | 6.184492324 | 7750  | 52.05137022 |
| NR_028080    | 0.217889272 | 2.583239214 | 4426  | 52.03241076 |
| NM_001005747 | 0.420693794 | 4.350111579 | 8065  | 52.02479375 |
| NM_006996    | 0.137483215 | 1.190869087 | 3635  | 52.00196598 |
| NM_032819    | 0.096829355 | 1.237032569 | 3315  | 52.0009862  |
| NM_001080481 | 0.349235101 | 2.52646414  | 6385  | 52.00014693 |
| NM_174916    | 0.409106606 | 5.378825048 | 7744  | 51.99861868 |
| NM_024921    | 0.172356568 | 1.488095238 | 3947  | 51.99682621 |
| NM_005244    | 0           | 1.945225759 | 2701  | 51.97114584 |
| NM_133372    | 0.361038456 | 3.566071969 | 6613  | 51.96057908 |
| NM_020727    | 0.396528638 | 3.602643647 | 7413  | 51.95814831 |
| NM_018923    | 0.234037054 | 1.012603216 | 4601  | 51.95578102 |
| NM_015471    | 0.546703492 | 1.967567568 | 13134 | 51.94944109 |
| NM_003838    | 0.224195067 | 1.577832293 | 4483  | 51.94418137 |
| NM_003740    | 0.155602455 | 1.386994449 | 3782  | 51.92873275 |
| NM_177444    | 0.335030092 | 3.010992617 | 6094  | 51.91026159 |
| NM_005811    | 0.204629295 | 2.083333333 | 4259  | 51.90669903 |
| NM_014777    | 0.307110032 | 3.997683948 | 5612  | 51.90666237 |

|                   |             |             |       |             |
|-------------------|-------------|-------------|-------|-------------|
| NM_001204144      | 0.221594146 | 3.937443744 | 4443  | 51.88529018 |
| NM_014634         | 0.279538581 | 2.748505304 | 5184  | 51.87322215 |
| NM_001115007      | 0.281580711 | 2.781933257 | 5213  | 51.8706687  |
| NM_080284         | 0.287194506 | 2.343277946 | 5295  | 51.86853966 |
| NM_001024912      | 0.11887123  | 1.332948644 | 3465  | 51.86698474 |
| NM_001243743      | 0.229698279 | 1.664534627 | 4533  | 51.86253341 |
| NM_001242858      | 0.20418576  | 1.747643732 | 4243  | 51.83799813 |
| NM_001205344      | 0.118877475 | 1.334874314 | 3460  | 51.82918183 |
| NM_138286         | 0.3570839   | 1.450977374 | 6496  | 51.81760186 |
| NM_014053         | 0.327632893 | 3.990234046 | 5938  | 51.81154654 |
| NM_144599         | 0.360506387 | 5.933891851 | 6564  | 51.81082379 |
| NM_001206938      | 0.315683973 | 2.27574171  | 5729  | 51.79598815 |
| NM_015175         | 0.448747692 | 15.12958768 | 8827  | 51.79132049 |
| NM_001134832      | 0.143830506 | 1.009021323 | 3657  | 51.775253   |
| NM_004239         | 0.42455155  | 5.236646884 | 8087  | 51.74878361 |
| NM_138923         | 0.407528863 | 6.220343426 | 7628  | 51.74549436 |
| NM_001205254      | 0.343232911 | 4.035599227 | 6207  | 51.74307738 |
| NM_001130916      | 0.345077875 | 3.778311709 | 6242  | 51.74299275 |
| ENST00000495723.1 | 0.169387581 | 1.696727648 | 3880  | 51.73855354 |
| NM_018100         | 0.30757036  | 1.032604801 | 5581  | 51.72871157 |
| NM_001490         | 0.308528229 | 2.50964975  | 5595  | 51.72190358 |
| NM_014744         | 0.416378218 | 9.556786351 | 7853  | 51.71890142 |
| NM_001200001      | 0.21231073  | 2.711435862 | 4310  | 51.71226551 |
| NM_020771         | 0.235609785 | 1.31993007  | 4575  | 51.7023958  |
| NM_005120         | 0.380678931 | 7.089252404 | 6968  | 51.69754572 |
| NM_004866         | 0.345774606 | 2.763452915 | 6243  | 51.69208677 |
| ENST00000341217.5 | 0.20207604  | 2.745055992 | 4196  | 51.68675251 |
| NM_001079803      | 0.137253647 | 1.28356546  | 3589  | 51.68563561 |
| NM_001204303      | 0.107419282 | 10.17561121 | 3353  | 51.68497109 |
| NM_001111308      | 0.237442276 | 2.672545177 | 4592  | 51.67418838 |
| NR_048573         | 0.35430228  | 5.845228799 | 6402  | 51.66388818 |
| NM_016052         | 0.413942442 | 1.765924591 | 7770  | 51.65956924 |
| NM_001184815      | 0.103883645 | 1.23856799  | 3323  | 51.6570468  |
| NM_173829         | 0.375970315 | 4.801692689 | 6852  | 51.65518564 |
| NM_002663         | 0.126269565 | 1.683924485 | 3495  | 51.65365458 |
| NR_026699         | 0.162042144 | 1.368421053 | 3799  | 51.64839421 |
| NM_018182         | 0.202732037 | 2.760543245 | 4196  | 51.6442593  |
| NM_020928         | 0.303767162 | 2.648555333 | 5502  | 51.64339635 |
| NM_014719         | 0.313755365 | 2.297316384 | 5663  | 51.64190361 |
| NM_004459         | 0.504591698 | 10.5233361  | 10862 | 51.63190858 |
| NM_017522         | 0.38243247  | 4.440263271 | 6988  | 51.62509959 |
| NM_001100122      | 0.238467637 | 4.787720444 | 4592  | 51.60470551 |
| NM_020452         | 0.325919602 | 4.940081939 | 5857  | 51.58807353 |
| NM_015490         | 0.240333402 | 2.282307025 | 4611  | 51.58466235 |
| NR_015352         | 0.011966657 | 1.234042553 | 2725  | 51.57685472 |
| NM_018482         | 0.347261562 | 3.559897502 | 6243  | 51.57459843 |
| NM_004555         | 0.357256672 | 7.051118707 | 6435  | 51.55987464 |
| NM_001005291      | 0.270910623 | 4.960207958 | 5000  | 51.55440423 |
| NM_001042537      | 0.250156309 | 2.814046964 | 4726  | 51.54868615 |
| NM_020754         | 0.426484875 | 5.136279242 | 8078  | 51.54621727 |
| NM_001257181      | 0.143805115 | 1.304827586 | 3624  | 51.54264763 |
| NM_020784         | 0.243431048 | 1.704374057 | 4640  | 51.53561999 |
| NM_032268         | 0.242819025 | 1.795380963 | 4632  | 51.53282709 |
| NM_198889         | 0.444991541 | 10.73010902 | 8621  | 51.53216932 |
| NM_001177665      | 0.483370648 | 9.397085427 | 9949  | 51.53102632 |
| NR_046207         | 0.380911476 | 4.862113774 | 6925  | 51.5184327  |
| NM_022482         | 0.251795624 | 3.001476482 | 4740  | 51.51211893 |
| NM_015112         | 0.319917004 | 5.767514814 | 5737  | 51.51151716 |

|                   |              |             |       |             |
|-------------------|--------------|-------------|-------|-------------|
| NM_207396         | 0.18253016   | 1.761269202 | 3970  | 51.50708735 |
| NM_001077498      | 0.201620311  | 2.786692289 | 4162  | 51.50631955 |
| NM_001142275      | 0.355437088  | 5.983870968 | 6385  | 51.50456973 |
| NM_152355         | 0.227794106  | 1.455035971 | 4447  | 51.4951914  |
| NM_021003         | 0.431471544  | 4.787176987 | 8203  | 51.49185799 |
| NM_001161520      | 0.315921671  | 2.373808683 | 5665  | 51.48797241 |
| NM_018919         | 0.241310783  | 1.096416938 | 4604  | 51.47917392 |
| NM_001130722      | 0.266106238  | 1.968699187 | 4919  | 51.47206684 |
| NM_198531         | 0.220271043  | 2.81868258  | 4356  | 51.46211113 |
| NM_001077619      | 0.277108773  | 3.146803473 | 5067  | 51.45746727 |
| NM_001198916      | 0.335766434  | 3.08413862  | 6001  | 51.45559823 |
| NM_000346         | 0.179528211  | 3.023131673 | 3933  | 51.4547682  |
| NM_144682         | 0.440863368  | 6.293423072 | 8468  | 51.45272388 |
| NM_017696         | 0.258990114  | 1.622355869 | 4821  | 51.45085164 |
| NM_001144026      | 0.263465855  | 4.064588887 | 4876  | 51.43097219 |
| NM_015635         | 0.380320958  | 6.665553781 | 6888  | 51.42962733 |
| NM_001098403      | 0.37977653   | 3.25901687  | 6875  | 51.42621339 |
| NM_152334         | 0.104065976  | 1.321797207 | 3293  | 51.41287555 |
| NM_015076         | 0.343842761  | 4.627626649 | 6138  | 51.40689422 |
| NM_014855         | 0.308010874  | 2.670411306 | 5518  | 51.40319553 |
| ENST00000559668.1 | 0.211851777  | 2.423230661 | 4252  | 51.39306613 |
| NM_020850         | 0.294328936  | 3.739868049 | 5304  | 51.39301156 |
| TCONS_00017343    | -0.061271511 | 26.74637681 | 2345  | 51.39228525 |
| NM_031435         | 0.261281959  | 1.250619835 | 4839  | 51.38738485 |
| NM_018151         | 0.482338679  | 9.58934551  | 9854  | 51.38684985 |
| NM_032977         | 0.331288181  | 2.412969861 | 5905  | 51.38648957 |
| NM_004176         | 0.266731663  | 5.076155569 | 4910  | 51.38113318 |
| NM_017669         | 0.207864886  | 2.795816496 | 4206  | 51.37287835 |
| NM_152715         | 0.190735636  | 2.214941673 | 4028  | 51.36119827 |
| NM_001080433      | 0.18618069   | 1.198845092 | 3982  | 51.35451336 |
| NM_024717         | 0.179098685  | 2.322597137 | 3911  | 51.33751695 |
| NM_012174         | 0.247635795  | 1.455228688 | 4656  | 51.33748759 |
| NM_000944         | 0.249227847  | 1.790846878 | 4675  | 51.33327392 |
| NM_018015         | 0.178411979  | 2.617827869 | 3903  | 51.32788559 |
| NM_182915         | 0.215738731  | 2.193043884 | 4283  | 51.32569098 |
| NM_001256141      | 0.301790875  | 1.987229317 | 5402  | 51.31718322 |
| NM_020156         | 0.348731006  | 2.318137887 | 6207  | 51.30991261 |
| NM_000573         | 0.447303094  | 3.571262767 | 8615  | 51.29968218 |
| NM_022893         | 0.334697441  | 3.332828792 | 5945  | 51.29737281 |
| NM_020894         | 0.248906544  | 1.845444802 | 4664  | 51.29478913 |
| NM_001160047      | 0.245815665  | 1.682230869 | 4625  | 51.29007996 |
| NM_145238         | 0.210212284  | 1.206021811 | 4217  | 51.28757616 |
| NM_014813         | 0.190591447  | 2.339726027 | 4014  | 51.28099857 |
| NM_032957         | 0.276925344  | 3.323453352 | 5026  | 51.26186251 |
| NM_022489         | 0.25322203   | 4.584713376 | 4709  | 51.24551276 |
| NM_004774         | 0.432318952  | 8.867574865 | 8147  | 51.23930771 |
| NM_001243108      | 0.12917726   | 1.654345943 | 3462  | 51.23813257 |
| NM_145262         | 0.16856187   | 1.466034755 | 3797  | 51.23305293 |
| NM_006187         | 0.370719859  | 8.432925909 | 6626  | 51.22355811 |
| NM_001136131      | 0.107616879  | 10.68437026 | 3294  | 51.21688307 |
| NM_005400         | 0.310657178  | 2.837318841 | 5519  | 51.21125925 |
| NM_006311         | 0.482522546  | 13.29191342 | 9793  | 51.20935552 |
| NM_020843         | 0.253742232  | 1.726905925 | 4708  | 51.20437766 |
| NM_019589         | 0.432545025  | 6.703576257 | 8136  | 51.18431295 |
| NM_014890         | 0.105349154  | 1.728466707 | 3273  | 51.18309923 |
| NM_000417         | 0.097599642  | 1.424129353 | 3215  | 51.16697562 |
| NM_001042603      | 0.508456489  | 8.703091832 | 10834 | 51.16304491 |
| NM_001039618      | 0.412116172  | 5.662706271 | 7574  | 51.16278346 |

|                |             |             |      |             |
|----------------|-------------|-------------|------|-------------|
| NM_014924      | 0.2572862   | 1.78325954  | 4742 | 51.1448923  |
| NM_015493      | 0.273032506 | 3.603030303 | 4949 | 51.14153027 |
| NM_173163      | 0.361816663 | 7.038467528 | 6420 | 51.13437766 |
| NM_001177638   | 0.321379182 | 2.529774489 | 5675 | 51.12226784 |
| NM_001040000   | 0.414675622 | 4.920435182 | 7628 | 51.12130772 |
| NM_007286      | 0.304093547 | 4.319251436 | 5396 | 51.11952788 |
| NM_001111309   | 0.237030919 | 2.707219251 | 4487 | 51.10753958 |
| NR_047585      | 0.057703011 | 7.790618627 | 2941 | 51.10169619 |
| TCONS_00000937 | 0.240852342 | 1.265887026 | 4531 | 51.1002809  |
| NM_013437      | 0.206642239 | 1.98626175  | 4148 | 51.0961818  |
| NM_002508      | 0.33365847  | 5.529501785 | 5880 | 51.09584019 |
| NR_015427      | 0.325180739 | 1.896407394 | 5733 | 51.09500438 |
| TCONS_00006773 | 0.269029567 | 1.76888434  | 4884 | 51.08432253 |
| NM_173206      | 0.244571082 | 2.744369123 | 4572 | 51.0795093  |
| NM_001010862   | 0.234988835 | 1.636017044 | 4458 | 51.07846124 |
| NM_175921      | 0.293130457 | 4.619302949 | 5221 | 51.07591039 |
| NM_006219      | 0.336189508 | 3.214695946 | 5919 | 51.0702851  |
| NM_018913      | 0.248490805 | 1.06042885  | 4616 | 51.05839972 |
| NM_001204146   | 0.219927496 | 4.421703617 | 4284 | 51.05751823 |
| NM_001242862   | 0.213042212 | 1.732541568 | 4209 | 51.05530803 |
| NM_152903      | 0.293835993 | 1.433817904 | 5227 | 51.05424144 |
| NM_182551      | 0.28222093  | 3.25513834  | 5059 | 51.05321898 |
| NM_032142      | 0.428330189 | 6.506519559 | 7975 | 51.0517465  |
| NM_032776      | 0.453950286 | 8.850915332 | 8739 | 51.04615723 |
| NM_001177663   | 0.483792526 | 9.56039685  | 9776 | 51.03932055 |
| NM_001174150   | 0.191645568 | 1.548532731 | 3986 | 51.03527636 |
| NM_001079804   | 0.138506781 | 1.297720798 | 3509 | 51.03211261 |
| NM_001198915   | 0.329319114 | 2.898618307 | 5789 | 51.02907597 |
| NM_001256253   | 0.060344315 | 1.352881356 | 2949 | 51.02771624 |
| NM_001177634   | 0.331677393 | 2.563733059 | 5828 | 51.02064256 |
| NM_001431      | 0.235639642 | 5.858168761 | 4455 | 51.0178332  |
| NM_021643      | 0.231317969 | 3.350204267 | 4405 | 51.01756014 |

Supplementary Table 3

## List of RiboSNitches detected by PARS

| Validation | Genomic location |           | Transcript position |      | RiboSNitches |        |        | Nucleotide base |    |    | Homo/Heterozygous |      |      |      |
|------------|------------------|-----------|---------------------|------|--------------|--------|--------|-----------------|----|----|-------------------|------|------|------|
|            | chr              | position  | Transcript          | Base | 91 vs 92     | 91vs78 | 92vs78 | WT              | 91 | 92 | 78                | 91   | 92   | 78   |
| No         | chr6             | 32948685  | NM_005104           | 4297 | Yes          | No     | No     | C               | T  | C  | T                 | het  | homo | het  |
| Yes        | chr15            | 64419374  | NM_003099           | 784  | Yes          | No     | Yes    | G               | G  | T  | T                 | homo | homo | het  |
| No         | chr6             | 33054355  | NM_002121           | 937  | Yes          | No     | Yes    | A               | C  | C  | C                 | het  | homo | het  |
| No         | chr1             | 236381825 | NM_019891           | 1651 | Yes          | No     | No     | C               | G  | C  | G                 | het  | homo | het  |
| No         | chr1             | 150594701 | NM_004436           | 1137 | No           | Yes    | No     | G               | A  | G  | G                 | het  | homo | homo |
| No         | chr3             | 176739404 | NM_024665           | 5688 | Yes          | No     | Yes    | T               | T  | C  | T                 | homo | het  | homo |
| No         | chr9             | 86595498  | NM_002140           | 72   | No           | Yes    | No     | C               | C  | T  | T                 | homo | het  | het  |
| No         | chr3             | 48508585  | NM_016381           | 1357 | No           | Yes    | No     | C               | T  | T  | T                 | het  | het  | homo |
| No         | chr4             | 38776180  | NM_001195107        | 1353 | Yes          | No     | Yes    | G               | T  | G  | T                 | homo | homo | het  |
| No         | chr3             | 38170810  | NR_024024           | 680  | No           | Yes    | No     | G               | C  | G  | G                 | het  | homo | homo |
| No         | chr1             | 64097432  | NM_001172818        | 960  | No           | No     | Yes    | C               | T  | T  | C                 | het  | het  | homo |
| Yes        | chr16            | 89628073  | NM_001243130        | 353  | Yes          | No     | Yes    | G               | G  | A  | A                 | homo | homo | het  |
| Yes        | chr11            | 73689104  | NM_003355           | 544  | Yes          | No     | No     | C               | C  | T  | T                 | homo | homo | het  |
| No         | chr6             | 32627714  | NM_001243961        | 1191 | Yes          | No     | Yes    | A               | C  | A  | C                 | het  | homo | het  |
| No         | chr12            | 55343628  | NM_014796           | 2164 | Yes          | No     | No     | T               | C  | C  | C                 | het  | homo | homo |
| No         | chr10            | 102746503 | NM_032112           | 540  | No           | Yes    | No     | G               | G  | A  | A                 | homo | het  | het  |
| No         | chr5             | 74037386  | NM_032380           | 1202 | Yes          | No     | No     | A               | A  | T  | T                 | homo | het  | het  |
| No         | chr22            | 32875190  | NM_001033024        | 233  | Yes          | Yes    | No     | G               | A  | G  | G                 | het  | homo | homo |
| No         | chr22            | 36537500  | NM_145642           | 2441 | Yes          | No     | No     | T               | T  | A  | A                 | homo | homo | het  |
| No         | chr2             | 109301687 | NM_001193488        | 2377 | Yes          | Yes    | No     | G               | C  | C  | C                 | homo | het  | het  |
| No         | chr11            | 5718517   | NM_006074           | 842  | Yes          | No     | No     | G               | A  | G  | A                 | het  | homo | het  |
| No         | chr19            | 17937429  | NM_000215           | 3598 | No           | Yes    | No     | T               | C  | C  | C                 | het  | het  | homo |
| No         | chr6             | 32628022  | NM_002123           | 859  | Yes          | No     | No     | T               | C  | T  | C                 | het  | homo | het  |
| No         | chr2             | 160710922 | NM_001198759        | 2618 | No           | Yes    | No     | A               | G  | G  | G                 | homo | het  | het  |
| No         | chr17            | 78311508  | NM_001256071        | 4800 | No           | No     | Yes    | G               | A  | A  | G                 | het  | het  | homo |
| No         | chr1             | 201845432 | NM_018085           | 3426 | Yes          | No     | No     | C               | C  | T  | T                 | homo | het  | het  |
| No         | chrX             | 102930960 | NM_001142424        | 1449 | No           | No     | Yes    | T               | C  | C  | C                 | homo | het  | homo |
| No         | chr22            | 38879940  | NM_006386           | 4293 | Yes          | No     | No     | T               | T  | C  | T                 | homo | het  | homo |
| No         | chr3             | 16419309  | NM_015150           | 1024 | Yes          | Yes    | No     | G               | A  | G  | G                 | het  | homo | homo |
| No         | chr11            | 66043898  | NM_030981           | 890  | Yes          | No     | No     | G               | A  | G  | G                 | het  | homo | homo |
| No         | chr7             | 32526687  | NR_024466           | 1255 | Yes          | Yes    | No     | G               | G  | A  | A                 | homo | het  | het  |
| No         | chr3             | 170893070 | NM_001161560        | 1089 | No           | No     | Yes    | C               | T  | C  | T                 | het  | homo | het  |
| No         | chr16            | 87788836  | NM_017566           | 435  | Yes          | Yes    | No     | C               | C  | T  | T                 | homo | het  | het  |
| No         | chr11            | 64009879  | NM_057092           | 122  | Yes          | No     | No     | G               | A  | G  | G                 | het  | homo | homo |
| No         | chr4             | 38777173  | NM_030956           | 677  | Yes          | No     | No     | T               | T  | A  | A                 | homo | het  | het  |
| Yes        | chr6             | 31238259  | NM_002117           | 688  | Yes          | No     | No     | C               | C  | A  | A                 | homo | homo | het  |
| Yes        | chr22            | 38273749  | NM_016091           | 1224 | Yes          | No     | No     | T               | C  | T  | C                 | homo | homo | het  |
| No         | chr17            | 44109474  | NM_001193466        | 3500 | No           | Yes    | Yes    | C               | T  | C  | T                 | homo | homo | het  |
| No         | chr5             | 118729286 | NM_001077654        | 961  | Yes          | Yes    | No     | C               | T  | C  | C                 | het  | homo | homo |
| No         | chr6             | 33267672  | NM_172209           | 3297 | No           | Yes    | No     | T               | C  | C  | C                 | homo | het  | het  |
| No         | chr1             | 162495325 | NM_001184763        | 4100 | No           | No     | Yes    | G               | A  | G  | A                 | het  | homo | het  |
| No         | chr8             | 27255146  | NM_173175           | 200  | No           | Yes    | Yes    | G               | G  | A  | A                 | homo | homo | het  |
| No         | chr7             | 150139639 | TCONS_00013631      | 302  | Yes          | Yes    | No     | G               | A  | G  | G                 | het  | homo | homo |
| No         | chr16            | 85009291  | NM_017740           | 1938 | Yes          | No     | No     | A               | G  | A  | A                 | het  | homo | homo |
| No         | chr5             | 140903792 | NM_001079812        | 3693 | No           | Yes    | No     | C               | T  | C  | C                 | het  | homo | homo |
| No         | chr1             | 171509327 | NM_015172           | 2982 | Yes          | No     | No     | G               | A  | A  | A                 | homo | het  | homo |
| No         | chr20            | 61599474  | NM_022082           | 2117 | No           | Yes    | No     | C               | T  | C  | T                 | homo | homo | het  |
| No         | chr6             | 160468278 | NM_000876           | 2287 | No           | Yes    | No     | A               | G  | G  | G                 | het  | homo | homo |
| No         | chr15            | 70352968  | NM_020908           | 1734 | No           | Yes    | Yes    | G               | G  | C  | C                 | homo | homo | het  |
| No         | chr3             | 10074549  | NM_001018115        | 176  | No           | No     | Yes    | A               | A  | G  | A                 | homo | het  | homo |
| No         | chr19            | 14038791  | NM_017721           | 2701 | No           | Yes    | No     | C               | C  | T  | T                 | homo | het  | het  |
| No         | chr17            | 35988672  | NM_007010           | 836  | Yes          | Yes    | No     | G               | A  | A  | A                 | het  | homo | homo |
| No         | chr7             | 150139639 | TCONS_00014232      | 81   | Yes          | No     | No     | G               | A  | G  | G                 | het  | homo | homo |
| No         | chrX             | 54836361  | NM_201222           | 445  | Yes          | No     | Yes    | A               | A  | G  | G                 | homo | homo | het  |
| Yes        | chr3             | 97664725  | NM_001042533        | 1733 | Yes          | Yes    | No     | G               | A  | G  | A                 | homo | homo | het  |
| No         | chr9             | 127177161 | NM_002799           | 164  | No           | No     | Yes    | T               | C  | C  | C                 | het  | homo | het  |
| No         | chr4             | 104059542 | NM_001813           | 6359 | No           | Yes    | No     | C               | T  | C  | C                 | het  | homo | homo |
| No         | chr8             | 23292985  | NM_001128930        | 1628 | No           | Yes    | No     | T               | T  | C  | C                 | homo | homo | het  |
| No         | chr1             | 45468606  | NM_024602           | 3242 | Yes          | No     | No     | T               | C  | C  | C                 | het  | homo | het  |

|     |       |           |                   |      |     |     |     |   |   |   |   |      |      |      |
|-----|-------|-----------|-------------------|------|-----|-----|-----|---|---|---|---|------|------|------|
| No  | chr8  | 38709553  | NM_001122824      | 5579 | Yes | No  | Yes | C | C | T | C | homo | het  | homo |
| No  | chr22 | 43529314  | NM_014507         | 739  | Yes | No  | Yes | C | G | C | G | het  | homo | het  |
| No  | chr6  | 32627830  | NM_002123         | 1051 | Yes | No  | No  | G | A | G | A | het  | homo | het  |
| Yes | chr12 | 124957627 | NM_001206654      | 783  | Yes | Yes | No  | G | A | G | A | homo | homo | het  |
| No  | chr11 | 65408937  | NM_153253         | 841  | Yes | Yes | No  | C | C | T | T | homo | het  | het  |
| No  | chr17 | 27587796  | NM_020772         | 5938 | No  | No  | Yes | A | G | A | G | homo | homo | het  |
| No  | chr20 | 43705551  | NM_006282         | 3288 | No  | Yes | No  | C | G | C | C | het  | homo | homo |
| No  | chr9  | 123578964 | NM_005047         | 2847 | Yes | No  | No  | A | A | G | G | homo | homo | het  |
| No  | chr3  | 3189279   | NM_182916         | 1050 | Yes | No  | No  | A | G | G | G | homo | het  | het  |
| No  | chr3  | 193334991 | NM_130837         | 707  | Yes | No  | Yes | G | A | G | A | het  | homo | het  |
| No  | chr1  | 25570081  | NM_020317         | 968  | Yes | No  | No  | A | G | A | A | het  | homo | homo |
| No  | chr9  | 92003679  | NM_006378         | 1551 | No  | Yes | Yes | G | A | A | A | het  | het  | homo |
| Yes | chr17 | 37921742  | NM_012481         | 1893 | Yes | No  | No  | G | A | G | A | homo | homo | het  |
| No  | chr6  | 7882205   | ENST00000439343.2 | 2580 | No  | No  | Yes | C | T | C | T | het  | homo | het  |
| No  | chr17 | 40280291  | NM_004583         | 669  | No  | Yes | No  | C | T | C | C | het  | homo | homo |
| No  | chr2  | 231331896 | NM_001080391      | 1398 | No  | Yes | No  | G | A | A | A | homo | het  | het  |
| No  | chr22 | 32875190  | NM_001257990      | 385  | Yes | Yes | No  | G | A | G | G | het  | homo | homo |
| No  | chr7  | 64437648  | NM_015852         | 3586 | Yes | No  | No  | C | T | C | C | het  | homo | homo |
| No  | chr5  | 149776355 | NM_000356         | 4169 | Yes | No  | No  | G | G | C | C | homo | het  | het  |
| No  | chr12 | 92539590  | NM_001731         | 84   | No  | Yes | No  | A | A | G | G | homo | het  | het  |
| No  | chr6  | 32629802  | NM_002123         | 685  | No  | No  | Yes | T | C | T | C | het  | homo | het  |
| No  | chr19 | 35837813  | NM_001185101      | 2310 | Yes | No  | No  | C | C | T | C | homo | het  | homo |
| No  | chr8  | 11643915  | NM_001135746      | 1263 | Yes | No  | No  | G | A | A | A | homo | het  | homo |
| No  | chr6  | 33036505  | NM_033554         | 812  | No  | Yes | No  | C | C | G | G | homo | het  | het  |
| No  | chr6  | 109688114 | NM_006016         | 2715 | Yes | No  | No  | T | T | C | T | homo | het  | homo |
| No  | chr5  | 151151544 | NM_198395         | 69   | No  | Yes | No  | A | G | A | A | het  | homo | homo |
| No  | chr16 | 23700676  | NM_005030         | 1441 | Yes | Yes | No  | T | A | T | T | het  | homo | homo |
| No  | chr10 | 121700255 | NR_037771         | 2858 | No  | No  | Yes | C | T | T | T | het  | het  | homo |
| No  | chr12 | 49521672  | NM_006082         | 1646 | Yes | No  | No  | C | T | C | C | het  | homo | homo |
| Yes | chr9  | 88959938  | NM_024617         | 1199 | Yes | Yes | No  | G | G | A | A | homo | homo | het  |
| No  | chr1  | 40539448  | NM_001142604      | 1129 | No  | Yes | No  | T | G | G | T | het  | het  | homo |
| No  | chr2  | 231331896 | NM_001206702      | 1398 | No  | Yes | No  | G | A | A | A | homo | het  | het  |
| No  | chr4  | 68484199  | NM_018227         | 3727 | Yes | No  | No  | T | T | C | C | homo | het  | het  |
| No  | chr2  | 128622491 | NM_031445         | 1361 | Yes | No  | No  | C | C | T | T | homo | het  | het  |
| No  | chr7  | 150761680 | NM_001199694      | 772  | Yes | No  | No  | C | A | C | A | het  | homo | het  |
| No  | chr7  | 43678997  | ENST00000395879.1 | 2307 | No  | No  | Yes | A | G | G | G | het  | homo | het  |
| No  | chr7  | 50469981  | NM_001220772      | 2561 | Yes | No  | No  | T | C | T | T | het  | homo | homo |
| No  | chr1  | 111415841 | NM_000560         | 120  | No  | Yes | No  | G | G | A | A | homo | het  | het  |
| No  | chr7  | 135614740 | NM_001128619      | 647  | Yes | No  | No  | A | A | G | G | homo | het  | het  |
| No  | chr14 | 75370123  | NM_001933         | 2515 | No  | No  | Yes | C | C | T | C | homo | het  | homo |
| No  | chr1  | 93617546  | NR_030761         | 3889 | No  | Yes | No  | A | G | G | G | het  | homo | homo |
| No  | chr5  | 149784658 | NM_004355         | 714  | Yes | No  | No  | T | T | C | C | homo | het  | het  |
| No  | chr12 | 125510104 | NM_080626         | 1027 | No  | Yes | No  | G | A | A | A | homo | het  | het  |
| No  | chr10 | 81925866  | NM_001157         | 1070 | Yes | No  | No  | A | G | A | G | het  | homo | het  |
| No  | chr4  | 2906707   | NM_014190         | 1566 | No  | Yes | No  | G | T | G | T | homo | homo | het  |
| No  | chr2  | 160673526 | NM_002349         | 4245 | Yes | No  | No  | T | C | T | C | homo | homo | het  |
| No  | chr17 | 40722029  | NM_170607         | 733  | Yes | Yes | No  | A | G | A | G | homo | homo | het  |
| No  | chr14 | 74759477  | NM_005050         | 1062 | Yes | No  | No  | G | G | A | G | homo | het  | homo |
| No  | chr1  | 182356399 | NM_001033056      | 438  | No  | No  | Yes | T | C | C | T | het  | het  | homo |
| No  | chr8  | 27255146  | NM_004103         | 298  | No  | Yes | Yes | G | G | A | A | homo | homo | het  |
| No  | chr10 | 129905896 | NM_001145966      | 3323 | Yes | No  | No  | A | T | A | T | het  | homo | het  |
| No  | chr1  | 154556663 | NM_015840         | 4464 | No  | No  | Yes | C | T | C | T | het  | homo | het  |
| No  | chr6  | 33036505  | NM_001242524      | 903  | No  | Yes | No  | C | C | G | G | homo | het  | het  |
| No  | chr3  | 122128638 | NM_014367         | 515  | No  | Yes | No  | G | A | G | G | het  | homo | homo |
| No  | chr2  | 191874667 | NM_139266         | 451  | No  | No  | Yes | T | C | T | C | het  | homo | het  |
| No  | chr6  | 100957344 | NM_006828         | 6856 | No  | No  | Yes | A | A | G | A | homo | het  | homo |
| No  | chr17 | 4622638   | NM_199004         | 1023 | No  | Yes | Yes | C | C | T | T | homo | homo | het  |
| No  | chr12 | 32137852  | NM_018169         | 4377 | Yes | No  | No  | C | G | C | C | het  | homo | homo |
| Yes | chr17 | 45900968  | NM_145255         | 1419 | Yes | No  | Yes | T | A | T | A | homo | homo | het  |
| No  | chr20 | 47267940  | NM_020820         | 2672 | Yes | Yes | No  | C | C | T | T | homo | het  | het  |
| No  | chr7  | 142498837 | ENST00000466254.1 | 113  | Yes | No  | No  | C | T | T | T | het  | homo | homo |
| No  | chr16 | 3777836   | NM_001079846      | 7302 | Yes | No  | Yes | A | G | A | G | het  | homo | het  |
| No  | chr3  | 191075902 | NM_178335         | 818  | Yes | No  | No  | C | T | C | T | het  | homo | het  |

|     |       |           |                   |      |     |     |     |   |   |   |   |      |      |      |
|-----|-------|-----------|-------------------|------|-----|-----|-----|---|---|---|---|------|------|------|
| No  | chr5  | 96110622  | NM_001040458      | 4651 | Yes | No  | No  | G | A | A | A | homo | het  | het  |
| Yes | chr3  | 97664725  | NM_032778         | 1730 | Yes | Yes | No  | G | A | G | A | homo | homo | het  |
| No  | chr17 | 12895855  | NM_001165962      | 2758 | Yes | No  | No  | T | A | A | A | homo | het  | homo |
| No  | chr4  | 42412687  | NM_006095         | 5973 | No  | No  | Yes | A | C | C | C | homo | het  | homo |
| No  | chr16 | 23677006  | NM_032486         | 585  | No  | No  | Yes | A | G | A | G | homo | homo | het  |
| No  | chr16 | 12663424  | NM_032167         | 3442 | No  | No  | Yes | C | G | C | G | het  | homo | het  |
| No  | chr22 | 50319079  | NM_024324         | 1018 | Yes | No  | No  | T | T | G | G | homo | het  | het  |
| No  | chr10 | 35302705  | NM_001198779      | 2185 | No  | Yes | No  | G | A | G | G | het  | homo | homo |
| Yes | chr12 | 124957627 | NM_006312         | 783  | Yes | Yes | No  | G | A | G | A | homo | homo | het  |
| Yes | chr16 | 58579274  | NM_001265612      | 4446 | Yes | No  | No  | G | A | G | A | homo | homo | het  |
| No  | chr21 | 47642609  | NM_002340         | 442  | No  | Yes | No  | C | T | C | T | homo | homo | het  |
| No  | chr4  | 38774889  | NM_001195108      | 2675 | No  | Yes | No  | A | G | A | G | homo | homo | het  |
| No  | chr2  | 202029160 | NM_001202518      | 2529 | No  | No  | Yes | G | T | T | G | het  | het  | homo |
| Yes | chr16 | 58579274  | NR_049763         | 4446 | Yes | No  | No  | G | A | G | A | homo | homo | het  |
| No  | chr16 | 31195279  | NM_004960         | 396  | No  | Yes | No  | C | C | T | T | homo | het  | het  |
| No  | chr5  | 108714298 | NM_014819         | 1110 | No  | Yes | No  | A | G | G | G | homo | het  | het  |
| No  | chr19 | 35648365  | NR_028406         | 885  | Yes | No  | No  | T | G | T | G | het  | homo | het  |
| No  | chr1  | 117617705 | NM_003594         | 519  | Yes | No  | No  | A | G | G | G | homo | het  | het  |
| No  | chr6  | 96054588  | NM_024641         | 1876 | No  | No  | Yes | C | T | C | T | homo | homo | het  |
| Yes | chr14 | 104152352 | NM_005552         | 2387 | Yes | No  | No  | C | G | C | G | homo | homo | het  |
| No  | chr12 | 24968069  | NM_005504         | 4561 | No  | Yes | No  | A | G | G | G | het  | homo | homo |
| No  | chr6  | 170627651 | NM_032448         | 1281 | No  | Yes | Yes | G | A | A | A | het  | het  | homo |
| No  | chr6  | 18215303  | NM_153042         | 1720 | No  | Yes | No  | T | C | C | C | het  | homo | homo |
| No  | chr3  | 170893070 | NM_001161564      | 1089 | No  | No  | Yes | C | T | C | T | het  | homo | het  |
| No  | chr2  | 25469502  | NM_175629         | 1604 | No  | No  | Yes | G | A | G | A | het  | homo | het  |
| No  | chr12 | 24968749  | NM_001178093      | 3477 | No  | Yes | No  | T | C | C | C | het  | homo | homo |
| No  | chr22 | 44489896  | NM_013327         | 264  | Yes | Yes | No  | T | C | C | C | homo | het  | het  |
| No  | chr17 | 75495397  | NM_001113493      | 2705 | No  | Yes | No  | T | T | C | C | homo | homo | het  |
| Yes | chr17 | 37921742  | NM_001257411      | 1464 | Yes | No  | No  | G | A | G | A | homo | homo | het  |
| No  | chr18 | 34398914  | NM_015476         | 536  | Yes | No  | No  | G | A | G | G | het  | homo | homo |
| No  | chr20 | 46268493  | NM_181659         | 3141 | Yes | No  | No  | A | A | G | G | homo | het  | het  |
| No  | chr6  | 33048628  | NM_002121         | 396  | Yes | No  | Yes | A | C | C | C | het  | homo | het  |
| No  | chr1  | 146650007 | NR_002305         | 578  | Yes | No  | Yes | G | A | G | A | het  | homo | het  |
| No  | chr22 | 38879940  | NM_001098504      | 4299 | Yes | No  | No  | T | T | C | T | homo | het  | homo |
| No  | chr8  | 17796382  | NM_006197         | 898  | Yes | No  | No  | A | G | G | G | homo | het  | het  |
| No  | chr19 | 10229580  | NM_003755         | 268  | Yes | No  | No  | A | G | A | A | het  | homo | homo |
| No  | chr1  | 31205796  | NM_006762         | 1759 | No  | No  | Yes | A | A | G | G | homo | homo | het  |
| No  | chr10 | 112658060 | NM_145341         | 1994 | No  | No  | Yes | G | A | A | A | het  | het  | homo |
| No  | chr14 | 66209190  | NR_038167         | 3093 | No  | No  | Yes | C | C | G | C | homo | het  | homo |
| No  | chr15 | 74328116  | NM_033250         | 2310 | Yes | Yes | No  | A | G | A | A | het  | homo | homo |
| No  | chr19 | 50411742  | NM_001193357      | 1526 | Yes | No  | No  | T | C | C | C | homo | het  | homo |
| No  | chr6  | 109688114 | NM_001142403      | 2119 | Yes | No  | No  | T | T | C | T | homo | het  | homo |
| No  | chr6  | 32605189  | NM_002122         | 7    | No  | No  | Yes | A | G | A | G | het  | homo | het  |
| No  | chr11 | 18424487  | NM_001165414      | 888  | No  | Yes | No  | A | G | A | G | homo | homo | het  |
| No  | chr17 | 61823899  | NM_020198         | 2130 | No  | No  | Yes | G | A | A | A | het  | homo | het  |
| No  | chr4  | 38776180  | NM_030956         | 1670 | No  | No  | Yes | G | T | G | T | homo | homo | het  |
| No  | chr19 | 55756980  | NM_014931         | 536  | Yes | No  | Yes | T | C | T | C | homo | homo | het  |
| No  | chr1  | 16259813  | NM_015001         | 7282 | Yes | No  | No  | A | G | G | G | homo | het  | homo |
| No  | chr18 | 9117867   | NM_021074         | 200  | No  | Yes | Yes | T | C | T | C | homo | homo | het  |
| No  | chr14 | 72117156  | NM_015556         | 2271 | Yes | No  | No  | T | C | C | C | het  | homo | het  |
| No  | chr14 | 75370123  | NR_033814         | 2457 | No  | No  | Yes | C | C | T | C | homo | het  | homo |
| No  | chr5  | 75469885  | ENST00000527880.1 | 286  | No  | No  | Yes | G | G | A | G | homo | het  | homo |
| No  | chr2  | 71631109  | NM_001014972      | 3252 | Yes | No  | Yes | A | A | G | A | homo | het  | homo |
| No  | chr11 | 71155171  | NM_001163817      | 439  | No  | Yes | No  | G | A | A | A | het  | homo | homo |
| No  | chr8  | 66515783  | NM_018120         | 1950 | Yes | Yes | No  | C | T | C | C | het  | homo | homo |
| No  | chr3  | 58413465  | NM_000925         | 1419 | Yes | No  | Yes | C | G | G | G | homo | het  | homo |
| No  | chr7  | 24758753  | NM_004403         | 822  | No  | No  | Yes | G | A | G | A | het  | homo | het  |
| No  | chr1  | 150238699 | NR_045033         | 1230 | Yes | Yes | No  | A | A | G | G | homo | homo | het  |
| No  | chr19 | 17628587  | NM_012088         | 617  | Yes | No  | No  | A | G | G | G | homo | het  | homo |
| No  | chr8  | 38706369  | NM_001146216      | 3571 | Yes | No  | No  | C | C | T | C | homo | het  | homo |
| No  | chr1  | 32831543  | NM_001143889      | 1852 | No  | Yes | No  | G | A | A | A | het  | homo | homo |
| Yes | chr10 | 11356160  | NM_001083591      | 1249 | Yes | No  | No  | C | T | C | T | homo | homo | het  |
| No  | chr10 | 97447373  | NM_015631         | 847  | Yes | No  | No  | T | T | A | A | homo | het  | het  |



|     |       |           |                   |       |     |     |     |   |   |   |   |      |      |      |
|-----|-------|-----------|-------------------|-------|-----|-----|-----|---|---|---|---|------|------|------|
| No  | chr3  | 160152299 | NM_001002800      | 4682  | No  | Yes | No  | C | A | A | A | homo | het  | het  |
| No  | chr12 | 24967212  | NM_005504         | 5418  | Yes | No  | No  | G | A | A | A | het  | homo | homo |
| No  | chr6  | 31237162  | NM_001243042      | 1114  | No  | Yes | No  | G | G | C | C | homo | homo | het  |
| No  | chr1  | 146740502 | NM_024568         | 1085  | Yes | No  | Yes | C | C | G | C | homo | het  | homo |
| No  | chr1  | 32831543  | NM_001143890      | 1735  | No  | Yes | No  | G | A | A | A | het  | homo | homo |
| No  | chr19 | 41257176  | NM_004596         | 418   | Yes | No  | No  | G | C | C | C | het  | homo | homo |
| No  | chr1  | 46827728  | NR_045789         | 2190  | Yes | No  | No  | A | A | C | A | homo | het  | homo |
| No  | chr6  | 32627830  | ENST00000443574.1 | 142   | Yes | No  | No  | G | A | G | A | het  | homo | het  |
| No  | chr6  | 32906586  | NM_002118         | 475   | Yes | No  | No  | G | A | G | A | het  | homo | het  |
| No  | chr7  | 36455477  | NM_018685         | 1710  | Yes | No  | No  | T | T | C | C | homo | homo | het  |
| No  | chr6  | 29912386  | NM_001242758      | 1089  | No  | Yes | No  | G | C | G | G | het  | homo | homo |
| No  | chr1  | 234529570 | NM_005646         | 4257  | Yes | No  | Yes | C | T | C | T | het  | homo | het  |
| No  | chr14 | 66209190  | NM_178155         | 3517  | No  | No  | Yes | C | C | G | C | homo | het  | homo |
| No  | chr9  | 100286431 | NM_001166116      | 97    | Yes | Yes | No  | C | C | A | A | homo | het  | het  |
| No  | chr7  | 50470156  | NM_006060         | 3546  | Yes | No  | No  | G | C | G | G | het  | homo | homo |
| No  | chr6  | 408012    | NR_046000         | 2027  | Yes | No  | No  | G | A | A | A | het  | homo | homo |
| No  | chr6  | 32906586  | ENST00000429234.1 | 394   | Yes | No  | No  | G | A | G | A | het  | homo | het  |
| No  | chr17 | 34416537  | NM_002983         | 282   | No  | Yes | No  | C | T | T | T | het  | het  | homo |
| No  | chr3  | 49362369  | NM_003363         | 670   | No  | No  | Yes | G | A | A | A | het  | het  | homo |
| No  | chr1  | 1477244   | NM_014188         | 1112  | Yes | No  | No  | A | G | A | A | het  | homo | homo |
| No  | chr2  | 32832683  | NM_016252         | 14366 | Yes | Yes | No  | C | C | T | T | homo | het  | het  |
| No  | chr12 | 93258665  | NM_003566         | 481   | No  | Yes | No  | T | T | C | C | homo | homo | het  |
| No  | chr7  | 2702282   | NM_025250         | 2668  | Yes | No  | No  | C | T | C | T | het  | homo | het  |
| Yes | chr20 | 25038484  | NM_032501         | 335   | Yes | Yes | Yes | C | C | A | A | homo | homo | het  |
| No  | chr22 | 21998280  | NM_022044         | 566   | No  | No  | Yes | G | A | G | A | het  | homo | het  |
| No  | chr19 | 16243416  | NM_005370         | 1148  | No  | Yes | Yes | C | T | C | T | homo | homo | het  |
| No  | chr6  | 408012    | NM_001195286      | 1893  | Yes | No  | No  | G | A | A | A | het  | homo | homo |
| No  | chr1  | 198691595 | NM_080921         | 1440  | No  | No  | Yes | T | T | A | T | homo | het  | homo |
| No  | chr22 | 44602229  | NM_001137605      | 1343  | Yes | No  | Yes | A | C | C | C | homo | het  | homo |
| Yes | chr17 | 37921742  | NM_183230         | 1776  | Yes | No  | No  | G | A | G | A | homo | homo | het  |
| No  | chr22 | 43576880  | NM_015140         | 476   | Yes | No  | No  | G | G | T | T | homo | het  | het  |
| No  | chr4  | 38776180  | NM_001017388      | 1164  | Yes | No  | Yes | G | T | G | T | homo | homo | het  |
| No  | chr14 | 102814945 | NM_001177612      | 523   | No  | Yes | No  | C | C | T | T | homo | het  | het  |
| No  | chr7  | 28862379  | NM_004904         | 5081  | No  | No  | Yes | G | A | G | A | het  | homo | het  |
| No  | chr19 | 52825235  | NM_144684         | 802   | No  | Yes | No  | A | G | G | G | homo | het  | het  |
| No  | chr7  | 102065651 | NR_038967         | 1433  | Yes | Yes | No  | C | T | T | T | homo | het  | het  |
| No  | chr18 | 9275542   | NM_001204056      | 6077  | No  | Yes | No  | C | T | C | C | het  | homo | homo |
| No  | chr5  | 44811207  | NM_016640         | 736   | Yes | No  | No  | T | T | G | G | homo | het  | het  |
| No  | chr2  | 238672703 | NM_004735         | 2567  | Yes | No  | No  | C | G | G | G | het  | homo | homo |
| No  | chr10 | 13375906  | NM_001195604      | 848   | No  | Yes | No  | A | G | G | G | homo | het  | het  |
| No  | chr17 | 40280291  | NM_201434         | 786   | No  | Yes | No  | C | T | C | C | het  | homo | homo |
| No  | chr2  | 68624260  | NM_002664         | 2527  | No  | Yes | No  | G | G | A | A | homo | het  | het  |
| No  | chr22 | 19025330  | NM_001184781      | 2940  | No  | Yes | No  | T | T | G | G | homo | het  | het  |
| No  | chr13 | 111938511 | NM_001113512      | 2131  | Yes | No  | Yes | T | T | C | T | homo | het  | homo |
| No  | chr6  | 31129642  | NM_007109         | 1427  | No  | Yes | No  | A | C | C | C | het  | homo | homo |
| No  | chr7  | 50469981  | NM_001220765      | 3245  | Yes | No  | No  | T | C | T | T | het  | homo | homo |
| No  | chr6  | 32813756  | NR_037175         | 812   | Yes | Yes | No  | G | G | A | A | homo | het  | het  |
| No  | chr4  | 147110891 | NM_007080         | 465   | Yes | No  | Yes | A | G | G | G | homo | het  | homo |
| No  | chr1  | 154556663 | NM_015841         | 4407  | No  | No  | Yes | C | T | C | T | het  | homo | het  |
| No  | chr6  | 29912386  | NM_002116         | 1089  | No  | Yes | No  | G | C | G | G | het  | homo | homo |
| Yes | chr17 | 45900968  | NM_148887         | 1517  | Yes | No  | Yes | T | A | T | A | homo | homo | het  |
| No  | chr22 | 41928145  | NM_138338         | 377   | No  | No  | Yes | C | C | T | C | homo | het  | homo |
| No  | chr11 | 3714489   | NM_139132         | 4705  | No  | Yes | No  | G | A | G | G | het  | homo | homo |
| No  | chr6  | 97339078  | NM_014165         | 520   | Yes | Yes | No  | T | C | C | C | het  | homo | homo |
| No  | chr4  | 1729988   | NM_006342         | 1014  | No  | No  | Yes | G | A | A | A | het  | het  | homo |
| No  | chr1  | 160303416 | NM_004371         | 757   | No  | Yes | No  | C | T | T | T | het  | homo | homo |
| No  | chr3  | 88101551  | NM_003663         | 3986  | No  | Yes | No  | C | T | T | T | homo | het  | het  |
| No  | chr12 | 21639421  | NM_032941         | 841   | Yes | No  | Yes | A | T | A | T | het  | homo | het  |
| No  | chr19 | 35739702  | NM_205834         | 144   | No  | No  | Yes | G | G | A | G | homo | het  | homo |
| No  | chr6  | 33036435  | NM_001242524      | 973   | No  | Yes | No  | A | A | C | C | homo | het  | het  |
| No  | chr9  | 88903367  | NM_001185074      | 4253  | Yes | No  | Yes | A | T | A | T | homo | homo | het  |
| No  | chr3  | 42826041  | NM_001099668      | 1297  | Yes | Yes | No  | A | C | A | A | het  | homo | homo |
| No  | chr2  | 220404648 | NM_001195731      | 1656  | Yes | No  | No  | G | A | A | A | het  | homo | homo |

|     |       |           |              |      |     |     |     |   |   |   |   |      |      |      |
|-----|-------|-----------|--------------|------|-----|-----|-----|---|---|---|---|------|------|------|
| No  | chr7  | 150070663 | NM_001099696 | 2499 | Yes | No  | No  | T | C | T | T | het  | homo | homo |
| No  | chr2  | 172216969 | NM_024770    | 339  | No  | No  | Yes | A | A | G | A | homo | het  | homo |
| No  | chr7  | 32526687  | NM_012322    | 508  | Yes | Yes | No  | G | G | A | A | homo | het  | het  |
| No  | chr22 | 36537500  | NR_027835    | 1092 | Yes | No  | No  | T | T | A | A | homo | homo | het  |
| No  | chr3  | 191114266 | NM_174908    | 6228 | Yes | No  | No  | T | T | C | T | homo | het  | homo |
| No  | chr6  | 31122315  | NM_001105563 | 840  | Yes | No  | Yes | C | G | C | G | het  | homo | het  |
| No  | chr19 | 19740729  | NM_016573    | 3073 | No  | No  | Yes | G | C | C | C | homo | het  | homo |
| No  | chr9  | 134346315 | NM_013318    | 2107 | Yes | No  | Yes | T | C | C | C | het  | homo | het  |
| No  | chr17 | 40280291  | NM_001252039 | 885  | No  | Yes | No  | C | T | C | C | het  | homo | homo |
| No  | chr11 | 18424487  | NM_001165416 | 791  | No  | Yes | No  | A | G | A | G | homo | homo | het  |
| No  | chr16 | 12667589  | NM_032167    | 7607 | Yes | No  | No  | G | G | A | G | homo | het  | homo |
| No  | chr1  | 146650542 | NR_002305    | 1113 | No  | No  | Yes | A | G | A | G | het  | homo | het  |
| No  | chr4  | 76722353  | NM_003715    | 2010 | No  | Yes | Yes | G | A | A | G | het  | het  | homo |
| No  | chr7  | 50470156  | NM_001220771 | 3117 | Yes | No  | No  | G | C | G | G | het  | homo | homo |
| No  | chr2  | 127453664 | NM_016815    | 605  | Yes | No  | No  | A | C | C | C | het  | homo | het  |
| No  | chr6  | 79656570  | NM_017934    | 4454 | Yes | No  | Yes | C | C | T | C | homo | het  | homo |
| No  | chr5  | 177637882 | NM_004499    | 1373 | Yes | No  | Yes | G | A | G | A | het  | homo | het  |
| Yes | chr6  | 31238259  | NM_001243042 | 688  | Yes | No  | No  | C | C | A | A | homo | homo | het  |
| No  | chr3  | 38184021  | NM_001172566 | 2042 | No  | Yes | No  | A | G | A | A | het  | homo | homo |
| No  | chr1  | 211920085 | NM_014873    | 4496 | No  | No  | Yes | C | T | C | T | het  | homo | het  |
| No  | chr20 | 62522466  | NM_199363    | 1909 | No  | Yes | No  | A | G | G | G | homo | het  | het  |
| No  | chr12 | 104341103 | NM_003299    | 2382 | Yes | No  | No  | C | C | T | C | homo | het  | homo |
| No  | chr5  | 108671837 | NM_014819    | 3442 | No  | Yes | No  | T | T | C | C | homo | het  | het  |
| No  | chr21 | 15745106  | NM_006948    | 2317 | No  | No  | Yes | G | A | G | A | homo | homo | het  |
| No  | chr2  | 176043097 | NM_001689    | 528  | Yes | No  | Yes | T | T | C | T | homo | het  | homo |
| No  | chr3  | 124951821 | NM_021964    | 2235 | No  | Yes | No  | G | A | A | A | het  | homo | homo |
| No  | chr19 | 1086043   | NM_012292    | 3689 | Yes | No  | No  | T | C | C | C | homo | het  | het  |
| No  | chr7  | 24758795  | NM_001127453 | 535  | Yes | No  | No  | A | G | A | G | het  | homo | het  |
| No  | chr6  | 31122315  | NM_019052    | 615  | Yes | No  | Yes | C | G | C | G | het  | homo | het  |
| No  | chr12 | 24968150  | NM_005504    | 4480 | Yes | No  | No  | T | G | G | G | het  | homo | homo |
| No  | chr7  | 50514577  | NM_001042762 | 786  | Yes | No  | No  | G | A | G | G | het  | homo | homo |
| No  | chr9  | 86278913  | NM_053067    | 1984 | Yes | No  | No  | G | A | A | A | homo | het  | homo |
| No  | chr6  | 32632832  | NM_001243961 | 204  | Yes | No  | No  | T | A | A | A | het  | homo | homo |
| No  | chr22 | 18111431  | NM_001039367 | 158  | No  | No  | Yes | A | A | G | G | homo | homo | het  |
| No  | chr14 | 105476853 | NM_017955    | 1510 | Yes | No  | No  | G | A | A | A | het  | homo | homo |
| No  | chr4  | 10076658  | NM_005112    | 2028 | No  | No  | Yes | A | G | A | G | het  | homo | het  |
| No  | chr20 | 47249116  | NM_020820    | 4352 | No  | No  | Yes | C | T | C | T | het  | homo | het  |
| No  | chr13 | 111938511 | NM_001113511 | 2281 | Yes | No  | Yes | T | T | C | T | homo | het  | homo |
| No  | chr13 | 46756332  | NM_002298    | 128  | Yes | No  | No  | A | G | A | A | het  | homo | homo |
| No  | chr2  | 3502055   | NM_018269    | 1311 | No  | Yes | Yes | A | C | C | C | het  | het  | homo |
| No  | chr6  | 35285720  | NM_022047    | 899  | No  | Yes | No  | A | A | C | C | homo | homo | het  |
| No  | chr9  | 86278913  | NM_013438    | 2068 | Yes | No  | No  | G | A | A | A | homo | het  | homo |
| No  | chr17 | 4069735   | NM_016376    | 4889 | Yes | Yes | No  | G | T | G | G | het  | homo | homo |
| No  | chr17 | 44109474  | NM_001193465 | 3283 | No  | Yes | Yes | C | T | C | T | homo | homo | het  |
| No  | chr3  | 47043622  | NM_015175    | 5174 | No  | Yes | No  | G | G | A | A | homo | het  | het  |
| No  | chr14 | 55457988  | NM_001008396 | 1281 | Yes | Yes | No  | C | C | G | G | homo | het  | het  |
| No  | chrX  | 2656258   | NM_001122898 | 619  | No  | Yes | No  | G | G | A | A | homo | het  | het  |
| No  | chr7  | 36895342  | NM_001206482 | 2708 | No  | Yes | Yes | G | G | A | A | homo | homo | het  |
| No  | chr8  | 103851052 | NM_015878    | 1111 | Yes | No  | Yes | A | G | A | G | het  | homo | het  |
| No  | chr20 | 52193088  | NM_006526    | 2486 | No  | Yes | No  | G | A | G | G | het  | homo | homo |
| No  | chr17 | 61888461  | NM_203499    | 1512 | No  | No  | Yes | G | A | G | A | het  | homo | het  |
| No  | chr12 | 102315592 | NM_018370    | 1734 | No  | No  | Yes | G | G | A | G | homo | het  | homo |
| No  | chr9  | 100286431 | NM_003275    | 174  | Yes | Yes | No  | C | C | A | A | homo | het  | het  |
| No  | chr18 | 10691246  | NM_022068    | 7161 | No  | Yes | No  | C | C | T | T | homo | het  | het  |
| No  | chr3  | 183901281 | NM_001025205 | 1336 | No  | Yes | No  | G | G | A | A | homo | het  | het  |
| No  | chr6  | 32610972  | NM_002122    | 1085 | No  | No  | Yes | G | A | G | A | het  | homo | het  |
| No  | chr14 | 31570052  | NM_015382    | 8406 | Yes | No  | No  | C | T | C | C | het  | homo | homo |
| No  | chr6  | 408012    | NM_002460    | 1896 | Yes | No  | No  | G | A | A | A | het  | homo | homo |
| Yes | chr17 | 45900968  | NR_037575    | 1568 | Yes | No  | Yes | T | A | T | A | homo | homo | het  |
| No  | chr9  | 135139901 | NM_015046    | 7942 | Yes | Yes | No  | A | A | G | G | homo | het  | het  |
| No  | chr9  | 93641151  | NM_001135052 | 1633 | Yes | Yes | No  | T | C | T | T | het  | homo | homo |
| No  | chr15 | 40686087  | NM_001142761 | 1631 | Yes | No  | Yes | T | T | C | T | homo | het  | homo |
| No  | chr1  | 46827728  | NM_199044    | 2015 | Yes | No  | No  | A | A | C | A | homo | het  | homo |

|     |       |           |              |      |     |     |     |   |   |   |   |      |      |      |
|-----|-------|-----------|--------------|------|-----|-----|-----|---|---|---|---|------|------|------|
| No  | chr19 | 39369369  | NM_030593    | 1890 | No  | No  | Yes | A | A | C | C | homo | homo | het  |
| No  | chr14 | 51206145  | NM_182944    | 5700 | No  | Yes | No  | T | T | A | A | homo | het  | het  |
| No  | chr7  | 43678997  | NM_018224    | 776  | No  | No  | Yes | A | G | G | G | het  | homo | het  |
| No  | chr2  | 201437048 | NM_001160033 | 2092 | No  | Yes | No  | A | A | G | G | homo | het  | het  |
| No  | chr12 | 62696599  | NM_001252079 | 321  | Yes | No  | No  | C | T | T | T | homo | het  | homo |
| No  | chr22 | 44602229  | NM_022141    | 1403 | Yes | No  | Yes | A | C | C | C | homo | het  | homo |
| No  | chr3  | 160154258 | NM_173084    | 2909 | No  | Yes | No  | T | G | G | T | het  | het  | homo |
| No  | chr2  | 109301687 | NM_001193484 | 2430 | Yes | Yes | No  | G | C | C | C | homo | het  | het  |
| No  | chr20 | 463995    | NM_177559    | 2179 | No  | No  | Yes | A | A | G | A | homo | het  | homo |
| No  | chr16 | 24955183  | NM_001006634 | 1335 | No  | No  | Yes | A | G | G | A | het  | het  | homo |
| No  | chr17 | 76672002  | NM_017456    | 1436 | No  | No  | Yes | A | A | G | G | homo | homo | het  |
| No  | chr1  | 182352621 | NM_002065    | 2938 | No  | Yes | No  | A | G | G | A | het  | het  | homo |
| No  | chr1  | 226570840 | NM_001618    | 1227 | No  | Yes | No  | A | G | G | A | het  | het  | homo |
| No  | chr14 | 100728769 | NM_003403    | 1288 | Yes | No  | No  | C | A | C | C | het  | homo | homo |
| No  | chr6  | 26415062  | NM_194441    | 3346 | Yes | Yes | No  | C | C | A | A | homo | het  | het  |
| No  | chr2  | 74333325  | NM_144993    | 9005 | No  | No  | Yes | G | A | G | A | het  | homo | het  |
| No  | chr21 | 34614255  | NM_207585    | 356  | No  | No  | Yes | T | G | T | G | het  | homo | het  |
| No  | chr2  | 242292307 | NM_001008491 | 2462 | No  | No  | Yes | T | C | T | C | het  | homo | het  |
| No  | chr20 | 62522466  | NM_001243894 | 1765 | No  | Yes | No  | A | G | G | G | homo | het  | het  |
| No  | chr2  | 25469502  | NM_022552    | 1533 | No  | No  | Yes | G | A | G | A | het  | homo | het  |
| No  | chr16 | 12664246  | NM_032167    | 4264 | No  | Yes | No  | A | G | G | G | homo | het  | het  |
| Yes | chr6  | 32546818  | NM_002124    | 945  | Yes | Yes | No  | G | G | A | A | homo | homo | het  |
| No  | chr7  | 50469981  | NM_001220766 | 3110 | No  | Yes | No  | T | C | T | T | het  | homo | homo |
| No  | chr7  | 150139639 | NR_034033    | 179  | Yes | Yes | No  | G | A | G | G | het  | homo | homo |
| No  | chr6  | 33032865  | NM_001242524 | 1253 | No  | Yes | No  | T | T | G | G | homo | het  | het  |
| No  | chr10 | 11356160  | NM_001025077 | 1106 | No  | Yes | No  | C | T | C | T | homo | homo | het  |
| No  | chr6  | 32813756  | NR_037173    | 977  | Yes | Yes | No  | G | G | A | A | homo | het  | het  |
| No  | chr2  | 131131424 | NM_014369    | 2111 | No  | Yes | No  | G | C | G | G | het  | homo | homo |
| No  | chr19 | 10265593  | NM_001379    | 1764 | Yes | No  | No  | C | C | A | C | homo | het  | homo |
| No  | chr14 | 24587639  | NR_028099    | 1262 | No  | Yes | No  | G | A | G | G | het  | homo | homo |
| No  | chr17 | 20906093  | NM_015276    | 2033 | Yes | No  | No  | G | A | G | G | het  | homo | homo |
| No  | chr1  | 207653364 | NM_001006658 | 3273 | No  | Yes | No  | A | A | G | G | homo | het  | het  |
| No  | chr2  | 39963667  | NR_028102    | 1878 | No  | Yes | Yes | T | C | C | C | het  | het  | homo |
| No  | chr6  | 32906716  | NM_002118    | 345  | No  | No  | Yes | A | G | A | G | het  | homo | het  |
| No  | chr3  | 49396751  | NM_001664    | 1749 | Yes | No  | No  | A | G | G | G | homo | het  | homo |
| No  | chr12 | 24966845  | NM_001178092 | 5602 | No  | Yes | No  | G | A | A | A | het  | homo | homo |
| No  | chr22 | 17630486  | NM_017829    | 229  | Yes | No  | No  | G | T | T | T | het  | homo | het  |
| No  | chr7  | 99633739  | NM_003439    | 3830 | Yes | Yes | No  | G | C | G | G | het  | homo | homo |
| No  | chr15 | 86288655  | NM_007200    | 9359 | Yes | No  | No  | A | C | A | C | het  | homo | het  |
| No  | chr2  | 219267781 | NM_182642    | 735  | No  | No  | Yes | C | C | T | T | homo | homo | het  |
| No  | chr6  | 24535208  | NM_170740    | 2943 | Yes | No  | No  | C | A | C | A | het  | homo | het  |
| No  | chr13 | 41517985  | NM_001145353 | 762  | Yes | No  | No  | T | C | C | C | het  | homo | het  |
| No  | chr22 | 36556823  | NR_027833    | 155  | No  | No  | Yes | C | A | A | A | het  | homo | het  |
| Yes | chr17 | 37921742  | NM_001257412 | 1347 | Yes | No  | No  | G | A | G | A | homo | homo | het  |
| No  | chr6  | 32605271  | NM_002122    | 89   | Yes | No  | Yes | C | T | C | T | het  | homo | het  |
| No  | chr14 | 102482399 | NM_001376    | 7613 | No  | Yes | No  | C | T | C | C | het  | homo | homo |
| No  | chr6  | 41568064  | NM_138457    | 3852 | Yes | Yes | No  | G | A | G | G | het  | homo | homo |
| No  | chr2  | 219266423 | NM_001206878 | 279  | No  | No  | Yes | C | A | C | A | homo | homo | het  |
| No  | chr1  | 154321663 | NM_020452    | 3741 | No  | Yes | No  | C | T | C | C | het  | homo | homo |
| Yes | chr14 | 50575821  | NR_049738    | 1302 | Yes | Yes | No  | C | C | T | T | homo | homo | het  |
| No  | chr18 | 72176083  | NM_018235    | 635  | Yes | Yes | No  | T | C | T | T | het  | homo | homo |
| No  | chr10 | 72186524  | NM_004096    | 5681 | No  | No  | Yes | T | C | C | C | het  | homo | het  |
| Yes | chr17 | 37921742  | NM_001257409 | 1674 | Yes | No  | No  | G | A | G | A | homo | homo | het  |
| No  | chr6  | 166739646 | NM_145169    | 347  | No  | No  | Yes | A | G | A | G | het  | homo | het  |
| No  | chr6  | 32796751  | NM_000544    | 2115 | No  | No  | Yes | A | A | G | A | homo | het  | homo |
| No  | chr6  | 32634350  | NM_001243961 | 117  | Yes | No  | No  | A | G | A | G | het  | homo | het  |
| No  | chr20 | 46283383  | NM_001174088 | 5731 | Yes | No  | No  | A | A | G | A | homo | het  | homo |
| No  | chr14 | 75599647  | NM_006827    | 2668 | No  | No  | Yes | T | C | C | C | homo | het  | homo |
| No  | chr2  | 160673519 | NM_001198760 | 4252 | No  | No  | Yes | C | C | T | C | homo | het  | homo |
| No  | chr1  | 110201699 | NR_024538    | 766  | No  | No  | Yes | T | C | C | C | het  | homo | het  |
| No  | chr16 | 4740441   | NM_015246    | 3400 | No  | Yes | No  | G | C | C | C | homo | het  | het  |
| No  | chr16 | 87788833  | NM_001184856 | 438  | Yes | No  | No  | C | C | A | C | homo | het  | homo |
| Yes | chr5  | 32602946  | NM_006713    | 2268 | Yes | Yes | No  | T | T | A | A | homo | homo | het  |

|     |       |           |                   |      |     |     |     |   |   |   |   |      |      |      |
|-----|-------|-----------|-------------------|------|-----|-----|-----|---|---|---|---|------|------|------|
| No  | chr21 | 26972144  | NM_080794         | 569  | No  | Yes | No  | G | T | G | G | het  | homo | homo |
| No  | chr2  | 113513825 | NM_152515         | 1202 | No  | Yes | No  | A | G | G | G | het  | het  | homo |
| No  | chr11 | 75115875  | NM_001260507      | 624  | Yes | No  | No  | C | A | C | C | het  | homo | homo |
| No  | chr13 | 111955907 | NM_003899         | 2885 | Yes | No  | No  | T | C | C | C | homo | het  | het  |
| No  | chr2  | 207024107 | NM_001199982      | 137  | No  | Yes | No  | C | C | G | G | homo | het  | het  |
| No  | chr7  | 6442433   | NM_018890         | 1233 | Yes | No  | No  | C | C | T | T | homo | het  | het  |
| No  | chr12 | 64803798  | NM_007235         | 489  | No  | Yes | No  | A | C | C | A | het  | het  | homo |
| No  | chr19 | 1037766   | NM_201277         | 1043 | No  | Yes | No  | G | G | A | A | homo | het  | het  |
| No  | chr5  | 150410219 | NM_006058         | 2207 | Yes | No  | No  | G | T | G | T | het  | homo | het  |
| No  | chr4  | 119200274 | NR_003584         | 358  | Yes | Yes | No  | C | T | T | T | het  | homo | homo |
| No  | chr20 | 2633936   | NR_027700         | 234  | Yes | Yes | No  | T | C | C | C | homo | het  | het  |
| No  | chr6  | 31322047  | NM_005514         | 1174 | Yes | No  | Yes | T | T | C | T | homo | het  | homo |
| No  | chr7  | 44606098  | NM_001257189      | 2038 | Yes | No  | Yes | G | G | A | G | homo | het  | homo |
| No  | chr7  | 99693078  | NM_005916         | 2121 | Yes | Yes | No  | C | T | C | C | het  | homo | homo |
| No  | chr12 | 24968150  | NM_001178094      | 4373 | Yes | No  | No  | T | G | G | G | het  | homo | homo |
| No  | chr16 | 31075175  | NM_001172670      | 917  | No  | Yes | No  | C | C | T | T | homo | het  | het  |
| No  | chr22 | 50716167  | NM_012401         | 5142 | No  | No  | Yes | C | T | T | T | het  | homo | het  |
| Yes | chr20 | 25038484  | NM_001252675      | 335  | Yes | Yes | Yes | C | C | A | A | homo | homo | het  |
| No  | chr4  | 113198130 | NM_052864         | 1725 | No  | No  | Yes | A | G | G | G | het  | homo | het  |
| No  | chr11 | 18424451  | NM_001135239      | 581  | Yes | No  | Yes | C | T | C | T | homo | homo | het  |
| No  | chr10 | 3206027   | NM_001242309      | 647  | Yes | Yes | No  | T | C | C | C | het  | homo | homo |
| No  | chr11 | 10801186  | NM_014633         | 4205 | Yes | No  | No  | C | G | C | C | het  | homo | homo |
| No  | chr3  | 48509515  | NM_016479         | 1848 | Yes | No  | No  | A | A | C | A | homo | het  | homo |
| No  | chr19 | 1086043   | NR_047652         | 3487 | Yes | No  | No  | T | C | C | C | homo | het  | het  |
| No  | chr7  | 155534653 | NM_053043         | 2558 | No  | Yes | Yes | C | C | G | G | homo | homo | het  |
| No  | chr3  | 160152299 | NM_005496         | 4837 | No  | Yes | No  | C | A | A | A | homo | het  | het  |
| Yes | chr1  | 33145742  | NM_001135256      | 1773 | Yes | Yes | Yes | A | G | A | G | homo | homo | het  |
| No  | chr7  | 43678997  | ENST00000395880.3 | 752  | No  | No  | Yes | A | G | G | G | het  | homo | het  |
| No  | chr2  | 101031561 | NM_004854         | 308  | No  | Yes | Yes | C | A | A | C | het  | het  | homo |
| No  | chr5  | 179260213 | NM_003900         | 1031 | Yes | No  | No  | G | G | A | A | homo | het  | het  |
| No  | chr12 | 133587980 | NM_001256279      | 2107 | No  | Yes | No  | C | T | C | T | homo | homo | het  |
| No  | chr2  | 150426362 | NM_015702         | 1222 | No  | Yes | No  | A | G | A | G | homo | homo | het  |
| No  | chr12 | 51746264  | NM_007210         | 4089 | Yes | Yes | No  | C | T | T | T | het  | homo | homo |
| No  | chr17 | 73826120  | NM_199242         | 3323 | No  | Yes | No  | G | A | G | G | het  | homo | homo |
| Yes | chr12 | 109039869 | NM_014325         | 2831 | Yes | No  | No  | A | G | A | G | homo | homo | het  |
| No  | chr17 | 4622638   | NR_047516         | 1037 | No  | No  | Yes | C | C | T | T | homo | homo | het  |
| No  | chr6  | 32629868  | NM_002123         | 619  | Yes | Yes | No  | T | T | C | C | homo | homo | het  |
| No  | chr12 | 32854366  | NM_012062         | 281  | Yes | No  | No  | A | A | C | A | homo | het  | homo |
| No  | chr10 | 43319197  | NM_014753         | 3779 | No  | No  | Yes | G | G | A | A | homo | homo | het  |
| No  | chr2  | 231331896 | NM_001206704      | 1433 | No  | Yes | No  | G | A | A | A | homo | het  | het  |
| No  | chr21 | 47642609  | NM_001001438      | 442  | No  | Yes | No  | C | T | C | T | homo | homo | het  |
| No  | chr9  | 130938661 | NM_001131018      | 1835 | Yes | No  | No  | G | G | A | A | homo | het  | het  |
| No  | chr4  | 75938179  | NM_015393         | 841  | Yes | No  | No  | G | A | G | G | het  | homo | homo |
| No  | chr19 | 10939792  | NM_001190716      | 2329 | Yes | No  | No  | T | T | C | C | homo | het  | het  |
| No  | chr5  | 68531253  | NM_001799         | 280  | No  | No  | Yes | C | T | T | T | het  | het  | homo |
| No  | chr19 | 35648365  | NM_144779         | 204  | Yes | No  | No  | T | G | T | G | het  | homo | het  |
| No  | chr5  | 140027216 | NM_001185012      | 155  | No  | No  | Yes | A | G | G | A | het  | het  | homo |
| No  | chr13 | 21357452  | NM_022459         | 3901 | No  | Yes | Yes | T | C | C | C | het  | het  | homo |
| No  | chr7  | 43678997  | ENST00000488813.1 | 1500 | No  | No  | Yes | A | G | G | G | het  | homo | het  |
| No  | chr3  | 58413465  | NR_033384         | 1489 | Yes | No  | Yes | C | G | G | G | homo | het  | homo |
| No  | chr6  | 7882205   | NM_030810         | 2509 | No  | No  | Yes | C | T | C | T | het  | homo | het  |
| No  | chr17 | 7215536   | NM_001143762      | 1094 | Yes | Yes | No  | T | C | T | C | homo | homo | het  |
| No  | chr16 | 31195279  | NR_028388         | 396  | No  | Yes | No  | C | C | T | T | homo | het  | het  |
| No  | chr8  | 23147564  | NM_001136108      | 511  | No  | No  | Yes | G | A | G | A | homo | homo | het  |
| No  | chr7  | 150070663 | NM_014374         | 2406 | Yes | No  | No  | T | C | T | T | het  | homo | homo |
| No  | chr16 | 57474687  | NM_020313         | 325  | Yes | No  | No  | C | C | G | G | homo | het  | het  |
| No  | chr15 | 80263217  | NM_001114735      | 427  | No  | No  | Yes | G | A | G | A | het  | homo | het  |
| No  | chr9  | 131910644 | NM_001193397      | 1946 | No  | No  | Yes | G | A | A | A | homo | het  | homo |
| No  | chr11 | 44640268  | NM_002231         | 969  | Yes | No  | No  | A | G | A | G | het  | homo | het  |
| No  | chr6  | 32948685  | NM_001199455      | 4005 | Yes | No  | No  | C | T | C | T | het  | homo | het  |
| No  | chr22 | 44368204  | NM_015380         | 608  | No  | No  | Yes | A | G | A | G | homo | homo | het  |
| No  | chr7  | 102065651 | NM_024653         | 703  | Yes | Yes | No  | C | T | T | T | homo | het  | het  |
| No  | chr6  | 409119    | NM_002460         | 3003 | Yes | No  | No  | A | A | G | A | homo | het  | homo |

|     |       |           |                   |      |     |     |     |   |   |   |   |      |      |      |
|-----|-------|-----------|-------------------|------|-----|-----|-----|---|---|---|---|------|------|------|
| No  | chr3  | 10074549  | NM_033084         | 176  | No  | No  | Yes | A | A | G | A | homo | het  | homo |
| No  | chr5  | 156821217 | NM_001037332      | 5402 | No  | Yes | No  | T | T | C | C | homo | homo | het  |
| No  | chr6  | 26415062  | NM_001145008      | 2896 | Yes | Yes | No  | C | C | A | A | homo | het  | het  |
| No  | chr2  | 201437048 | NM_152524         | 2092 | No  | Yes | No  | A | A | G | G | homo | het  | het  |
| No  | chr1  | 182352621 | NM_001033044      | 2582 | No  | Yes | No  | A | G | G | A | het  | het  | homo |
| No  | chr3  | 98299365  | NM_000097         | 1634 | Yes | No  | Yes | A | A | C | A | homo | het  | homo |
| No  | chr20 | 17968923  | NM_052865         | 928  | No  | Yes | No  | T | C | C | T | het  | het  | homo |
| Yes | chr16 | 89628073  | NM_000977         | 410  | Yes | No  | Yes | G | G | A | A | homo | homo | het  |
| No  | chr16 | 66646591  | NR_037619         | 799  | No  | Yes | No  | C | C | T | T | homo | het  | het  |
| No  | chr12 | 24964523  | NM_001178092      | 7924 | Yes | No  | No  | G | G | A | G | homo | het  | homo |
| No  | chr1  | 150594701 | NM_207046         | 1001 | No  | Yes | No  | G | A | G | G | het  | homo | homo |
| Yes | chr17 | 37921742  | NM_001257408      | 1791 | Yes | No  | No  | G | A | G | A | homo | homo | het  |
| No  | chr1  | 183093875 | NM_002293         | 2768 | Yes | No  | No  | T | C | C | C | homo | het  | het  |
| No  | chr10 | 106014706 | NM_004832         | 239  | Yes | No  | No  | G | A | G | G | het  | homo | homo |
| No  | chr12 | 24968150  | NM_001178092      | 4297 | Yes | No  | No  | T | G | G | G | het  | homo | homo |
| No  | chr6  | 7405508   | NM_153005         | 607  | Yes | Yes | No  | G | G | A | A | homo | het  | het  |
| Yes | chr2  | 29001691  | NM_002709         | 566  | Yes | Yes | No  | A | A | G | G | homo | homo | het  |
| No  | chr20 | 4764576   | NM_170774         | 1378 | No  | No  | Yes | G | G | A | G | homo | het  | homo |
| No  | chr17 | 80350331  | NM_024648         | 1055 | No  | No  | Yes | C | T | C | T | het  | homo | het  |
| No  | chr5  | 151184701 | NM_005754         | 2621 | No  | Yes | No  | C | T | C | C | het  | homo | homo |
| No  | chr17 | 4622638   | NM_001257330      | 1068 | No  | Yes | Yes | C | C | T | T | homo | homo | het  |
| No  | chr12 | 54357495  | NR_003716         | 959  | No  | No  | Yes | G | C | G | C | het  | homo | het  |
| No  | chr12 | 69663852  | NM_007007         | 2330 | Yes | No  | No  | G | G | C | C | homo | het  | het  |
| No  | chr19 | 10396336  | NM_000201         | 2291 | Yes | Yes | No  | C | C | T | T | homo | het  | het  |
| No  | chr14 | 105239894 | NM_005163         | 1280 | No  | Yes | No  | G | A | G | G | het  | homo | homo |
| No  | chr19 | 1086043   | NM_001258328      | 3600 | Yes | No  | No  | T | C | C | C | homo | het  | het  |
| No  | chr6  | 79911190  | NM_138730         | 652  | Yes | No  | No  | C | T | C | T | het  | homo | het  |
| No  | chr17 | 27009749  | NM_003170         | 1692 | No  | No  | Yes | C | C | T | C | homo | het  | homo |
| No  | chr16 | 58587737  | NM_016284         | 3252 | Yes | No  | No  | G | G | A | A | homo | het  | het  |
| No  | chr22 | 36556823  | NM_145642         | 1601 | No  | No  | Yes | C | A | A | A | het  | homo | het  |
| No  | chr6  | 409119    | NM_001195286      | 3000 | Yes | No  | No  | A | A | G | A | homo | het  | homo |
| No  | chr1  | 203276437 | NM_006763         | 419  | Yes | No  | No  | C | T | C | C | het  | homo | homo |
| No  | chr6  | 29913449  | NM_002116         | 1399 | Yes | No  | No  | C | G | C | C | het  | homo | homo |
| No  | chr12 | 24966845  | NM_001178091      | 5674 | No  | Yes | No  | G | A | A | A | het  | homo | homo |
| No  | chr6  | 132781472 | NM_003569         | 1461 | Yes | No  | No  | C | A | C | A | het  | homo | het  |
| No  | chr2  | 71654175  | NM_001252612      | 5815 | Yes | No  | No  | G | G | A | G | homo | het  | homo |
| No  | chr19 | 39196745  | NM_004924         | 665  | Yes | No  | No  | C | T | T | T | homo | het  | homo |
| No  | chr22 | 36556823  | NM_145640         | 155  | No  | No  | Yes | C | A | A | A | het  | homo | het  |
| No  | chr6  | 32627807  | ENST00000443574.1 | 165  | Yes | No  | Yes | T | T | A | A | homo | homo | het  |
| No  | chr5  | 176867943 | NM_001004106      | 1726 | No  | Yes | No  | A | G | G | A | het  | het  | homo |
| No  | chr6  | 33256984  | NM_001164267      | 321  | No  | Yes | No  | G | A | A | A | homo | het  | het  |
| Yes | chr8  | 27255263  | NM_173174         | 970  | Yes | No  | No  | A | A | G | G | homo | homo | het  |
| No  | chr6  | 90037581  | NM_016021         | 3105 | No  | Yes | No  | C | C | T | T | homo | het  | het  |
| No  | chr1  | 79095581  | NM_006820         | 883  | Yes | No  | Yes | T | C | C | C | homo | het  | homo |
| No  | chr5  | 132093994 | NM_001098813      | 1973 | Yes | No  | No  | G | A | G | G | het  | homo | homo |
| Yes | chr5  | 150518988 | NM_001155         | 358  | Yes | No  | No  | C | T | C | T | homo | homo | het  |
| No  | chr1  | 212619339 | NM_013349         | 567  | Yes | No  | No  | T | C | T | T | het  | homo | homo |
| No  | chr2  | 96809331  | NM_004418         | 1262 | Yes | No  | No  | A | G | G | G | het  | homo | het  |
| No  | chr19 | 18685964  | NM_003333         | 483  | No  | No  | Yes | G | G | T | G | homo | het  | homo |
| No  | chr2  | 39963667  | NM_025264         | 1757 | No  | Yes | Yes | T | C | C | C | het  | het  | homo |
| No  | chr7  | 6442433   | NM_006908         | 1176 | Yes | No  | No  | C | C | T | T | homo | het  | het  |
| No  | chr3  | 170893070 | NM_001161566      | 1089 | No  | No  | Yes | C | T | C | T | het  | homo | het  |
| No  | chr1  | 161017556 | NM_001025598      | 3601 | No  | Yes | No  | G | A | G | G | het  | homo | homo |
| No  | chr16 | 12663277  | NM_032167         | 3295 | Yes | Yes | No  | A | C | A | C | homo | homo | het  |
| Yes | chr19 | 10370542  | NM_146387         | 1143 | Yes | Yes | No  | C | T | C | T | homo | homo | het  |
| No  | chr1  | 46078884  | NM_001195193      | 1437 | No  | No  | Yes | C | T | T | C | het  | het  | homo |
| No  | chr1  | 117644058 | NM_003594         | 3421 | No  | No  | Yes | A | G | A | G | het  | homo | het  |
| No  | chr1  | 197070442 | NM_018136         | 8196 | No  | Yes | Yes | C | C | A | A | homo | homo | het  |
| No  | chr18 | 72167124  | NM_001168499      | 302  | No  | Yes | No  | C | G | C | C | het  | homo | homo |
| No  | chr7  | 148877605 | NM_170686         | 2916 | Yes | No  | No  | C | C | T | C | homo | het  | homo |
| No  | chr12 | 62696599  | NM_001252078      | 321  | Yes | No  | No  | C | T | T | T | homo | het  | homo |
| No  | chr6  | 409119    | NR_046000         | 3134 | Yes | No  | No  | A | A | G | A | homo | het  | homo |
| No  | chr3  | 124738290 | NM_020733         | 1472 | No  | Yes | No  | T | C | T | T | het  | homo | homo |

|     |       |           |              |      |     |     |     |   |   |   |   |      |      |      |
|-----|-------|-----------|--------------|------|-----|-----|-----|---|---|---|---|------|------|------|
| No  | chr16 | 89613123  | NM_003119    | 1528 | Yes | No  | No  | A | G | A | A | het  | homo | homo |
| No  | chr17 | 48450536  | NM_016504    | 27   | No  | Yes | No  | A | C | A | A | het  | homo | homo |
| No  | chr11 | 67203442  | NM_005608    | 446  | Yes | No  | Yes | G | G | A | G | homo | het  | homo |
| No  | chr6  | 408079    | NR_046000    | 2094 | No  | No  | Yes | C | C | T | C | homo | het  | homo |
| No  | chr19 | 2072646   | NM_130807    | 1720 | No  | Yes | Yes | A | G | A | G | homo | homo | het  |
| No  | chr9  | 113018755 | NM_003329    | 166  | Yes | No  | No  | A | G | A | A | het  | homo | homo |
| No  | chr22 | 39131727  | NM_015374    | 2993 | Yes | No  | Yes | A | A | C | A | homo | het  | homo |
| No  | chr2  | 160673526 | NM_001198760 | 4245 | Yes | Yes | No  | T | C | T | C | homo | homo | het  |
| No  | chr6  | 33036853  | NM_001242524 | 769  | No  | Yes | No  | T | T | G | G | homo | het  | het  |
| No  | chr11 | 3723781   | NM_139132    | 3845 | Yes | No  | No  | C | C | G | C | homo | het  | homo |
| No  | chr5  | 151184701 | NM_198395    | 2590 | No  | Yes | No  | C | T | C | C | het  | homo | homo |
| No  | chr15 | 85669452  | NM_173454    | 2151 | Yes | No  | Yes | C | T | C | T | het  | homo | het  |
| No  | chr3  | 23848835  | NM_182666    | 304  | No  | No  | Yes | A | C | A | C | het  | homo | het  |
| No  | chr8  | 17796383  | NM_006197    | 899  | Yes | Yes | No  | C | T | T | T | homo | het  | het  |
| No  | chr13 | 41517985  | NM_172373    | 979  | Yes | No  | No  | T | C | C | C | het  | homo | het  |
| No  | chr5  | 14389469  | NM_007118    | 4026 | Yes | No  | Yes | C | C | T | C | homo | het  | homo |
| No  | chr17 | 36925483  | NM_003559    | 2193 | Yes | No  | No  | G | G | A | A | homo | het  | het  |
| No  | chr16 | 66646591  | NR_037613    | 1126 | No  | Yes | No  | C | C | T | T | homo | het  | het  |
| No  | chr3  | 13399786  | NM_024923    | 2347 | No  | No  | Yes | C | T | T | T | homo | het  | homo |
| No  | chr1  | 19950062  | NR_033758    | 355  | No  | No  | Yes | T | C | T | C | het  | homo | het  |
| No  | chr2  | 160710922 | NM_001198760 | 2618 | No  | Yes | No  | A | G | G | G | homo | het  | het  |
| No  | chr7  | 44444122  | NM_015332    | 889  | Yes | Yes | No  | C | T | C | C | het  | homo | homo |
| No  | chr6  | 33036435  | NM_001242525 | 897  | No  | Yes | No  | A | A | C | C | homo | het  | het  |
| No  | chr9  | 130938661 | NM_001131015 | 1947 | Yes | No  | No  | G | G | A | A | homo | het  | het  |
| No  | chr13 | 111938511 | NM_145735    | 2218 | Yes | No  | Yes | T | T | C | T | homo | het  | homo |
| No  | chr5  | 108671838 | NM_014819    | 3441 | Yes | Yes | No  | G | G | A | A | homo | het  | het  |
| No  | chr17 | 42475983  | NM_001002909 | 3681 | No  | No  | Yes | C | G | G | C | het  | het  | homo |
| No  | chr19 | 4910889   | NM_013282    | 324  | Yes | No  | No  | G | G | T | G | homo | het  | homo |
| No  | chr16 | 87864475  | NM_003486    | 3697 | No  | No  | Yes | C | G | C | G | het  | homo | het  |
| No  | chr6  | 32605274  | NM_002122    | 92   | Yes | No  | Yes | T | C | T | C | het  | homo | het  |
| No  | chr6  | 32629802  | NM_001243961 | 685  | No  | No  | Yes | T | C | T | C | het  | homo | het  |
| No  | chr6  | 33032861  | NM_001242525 | 1181 | No  | Yes | No  | C | C | T | T | homo | het  | het  |
| No  | chr7  | 50470156  | NM_001220775 | 2871 | Yes | No  | No  | G | C | G | G | het  | homo | homo |
| No  | chr17 | 44109474  | NM_015443    | 3202 | No  | Yes | Yes | C | T | C | T | homo | homo | het  |
| No  | chr11 | 82535963  | NM_005040    | 1589 | No  | Yes | No  | G | G | A | A | homo | het  | het  |
| No  | chr8  | 27301725  | NM_173174    | 2959 | No  | No  | Yes | C | C | G | C | homo | het  | homo |
| Yes | chr8  | 27255080  | NM_173175    | 134  | Yes | Yes | No  | A | A | G | G | homo | homo | het  |
| No  | chr8  | 27311703  | NM_173174    | 3436 | Yes | Yes | No  | T | C | C | C | het  | homo | homo |
| No  | chr16 | 72137561  | NM_014003    | 2053 | Yes | No  | Yes | G | G | A | G | homo | het  | homo |
| No  | chr1  | 162495325 | NM_175866    | 4441 | No  | No  | Yes | G | A | G | A | het  | homo | het  |
| No  | chr1  | 15755248  | NM_024329    | 828  | Yes | Yes | No  | C | C | T | T | homo | het  | het  |
| No  | chr1  | 234740880 | NM_182972    | 3798 | Yes | No  | No  | G | A | G | A | het  | homo | het  |
| No  | chr15 | 89169614  | NM_022767    | 325  | No  | No  | Yes | A | G | G | G | homo | het  | homo |
| No  | chr7  | 5396715   | NM_001080495 | 5375 | Yes | No  | No  | A | G | G | G | het  | homo | homo |
| No  | chr5  | 437586    | NM_001242412 | 4787 | No  | No  | Yes | G | A | A | A | het  | homo | het  |
| No  | chr2  | 27016988  | NM_001809    | 962  | Yes | No  | No  | C | T | T | T | homo | het  | het  |
| No  | chr11 | 18424451  | NR_028500    | 637  | Yes | No  | Yes | C | T | C | T | homo | homo | het  |
| No  | chr20 | 44757814  | NM_001250    | 1046 | Yes | No  | Yes | C | C | G | C | homo | het  | homo |
| No  | chr12 | 113357209 | NM_016816    | 1160 | No  | No  | Yes | G | G | A | G | homo | het  | homo |
| No  | chr20 | 62522466  | NM_199360    | 1996 | No  | Yes | No  | A | G | G | G | homo | het  | het  |
| No  | chr11 | 119172536 | NM_005188    | 4908 | Yes | No  | No  | A | G | G | G | het  | homo | homo |
| No  | chr20 | 37581437  | NM_030919    | 2163 | Yes | No  | No  | A | A | G | A | homo | het  | homo |
| No  | chr3  | 88101551  | NM_001195308 | 4069 | No  | Yes | No  | C | T | T | T | homo | het  | het  |
| No  | chr14 | 66209190  | NM_004480    | 3087 | No  | No  | Yes | C | C | G | C | homo | het  | homo |
| No  | chr7  | 50470156  | NM_001220776 | 2841 | Yes | No  | No  | G | C | G | G | het  | homo | homo |
| No  | chr12 | 24964523  | NM_001178091 | 7996 | Yes | No  | No  | G | G | A | G | homo | het  | homo |
| No  | chr11 | 614243    | NM_004029    | 980  | No  | No  | Yes | G | G | A | G | homo | het  | homo |
| No  | chr12 | 24968749  | NM_005504    | 3881 | No  | Yes | No  | T | C | C | C | het  | homo | homo |
| No  | chr17 | 17046024  | NM_201274    | 1069 | Yes | No  | Yes | C | A | A | A | het  | homo | het  |
| No  | chr4  | 2826400   | NM_001122681 | 420  | No  | Yes | Yes | T | C | T | C | homo | homo | het  |
| No  | chr16 | 19548030  | NM_014711    | 1429 | No  | Yes | No  | T | T | A | A | homo | het  | het  |
| No  | chr2  | 231331896 | NM_003113    | 1398 | No  | Yes | No  | G | A | A | A | homo | het  | het  |
| No  | chr7  | 24758795  | NM_001127454 | 550  | Yes | No  | No  | A | G | A | G | het  | homo | het  |

|     |       |           |              |      |     |     |     |   |   |   |   |      |      |      |
|-----|-------|-----------|--------------|------|-----|-----|-----|---|---|---|---|------|------|------|
| No  | chr3  | 193334991 | NM_015560    | 707  | Yes | No  | Yes | G | A | G | A | het  | homo | het  |
| No  | chr7  | 129297332 | NM_001040110 | 241  | Yes | No  | No  | T | T | G | G | homo | het  | het  |
| No  | chr19 | 10794630  | NM_001137673 | 2372 | Yes | Yes | No  | G | T | T | T | homo | het  | het  |
| No  | chr9  | 123665019 | NM_001190947 | 3367 | No  | No  | Yes | T | T | C | T | homo | het  | homo |
| No  | chr3  | 170893070 | NM_001161562 | 1089 | No  | No  | Yes | C | T | C | T | het  | homo | het  |
| No  | chr6  | 31431820  | NR_040662    | 773  | Yes | No  | Yes | C | C | T | C | homo | het  | homo |
| No  | chr22 | 21062168  | NM_002650    | 2849 | No  | No  | Yes | G | A | G | A | het  | homo | het  |
| No  | chr6  | 26415062  | NM_007048    | 3052 | Yes | Yes | No  | C | C | A | A | homo | het  | het  |
| No  | chr11 | 252851    | NM_175932    | 1630 | Yes | No  | No  | A | A | G | G | homo | het  | het  |
| No  | chr5  | 150410219 | NM_001252392 | 2030 | Yes | No  | No  | G | T | G | T | het  | homo | het  |
| No  | chr2  | 219266423 | NM_182642    | 540  | No  | No  | Yes | C | A | C | A | homo | homo | het  |
| No  | chr19 | 1079959   | NR_047652    | 1583 | Yes | Yes | No  | G | G | A | A | homo | het  | het  |
| No  | chr11 | 6625566   | NM_001014794 | 200  | Yes | No  | No  | A | G | A | A | het  | homo | homo |
| No  | chr22 | 36677914  | NM_002473    | 6914 | Yes | Yes | No  | T | C | T | T | het  | homo | homo |
| Yes | chr3  | 196742290 | NM_005929    | 1293 | Yes | No  | No  | A | A | G | G | homo | homo | het  |
| Yes | chr19 | 2520716   | NM_052847    | 208  | Yes | Yes | Yes | A | A | G | G | homo | homo | het  |
| No  | chr6  | 408079    | NM_001195286 | 1960 | No  | No  | Yes | C | C | T | C | homo | het  | homo |
| No  | chr20 | 43704963  | NM_006282    | 2700 | Yes | Yes | No  | C | G | G | G | homo | het  | het  |
| No  | chr22 | 45723854  | NM_017911    | 721  | Yes | Yes | No  | C | G | C | C | het  | homo | homo |
| No  | chr2  | 242292307 | NM_001008492 | 2260 | No  | No  | Yes | T | C | T | C | het  | homo | het  |
| No  | chr8  | 117783914 | NM_032334    | 684  | No  | Yes | No  | A | A | C | C | homo | het  | het  |
| No  | chr6  | 33048640  | NM_002121    | 408  | Yes | No  | Yes | A | A | G | A | homo | het  | homo |
| No  | chr6  | 31237162  | NM_002117    | 1114 | No  | Yes | No  | G | G | C | C | homo | homo | het  |
| No  | chr7  | 139026152 | NM_197964    | 256  | Yes | No  | Yes | T | G | T | G | het  | homo | het  |
| Yes | chr17 | 76220206  | NM_001012271 | 1190 | Yes | No  | No  | T | T | C | C | homo | homo | het  |
| No  | chr11 | 63991581  | NM_001160390 | 863  | Yes | No  | No  | C | T | C | C | het  | homo | homo |
| No  | chrX  | 148562599 | NM_000202    | 3548 | No  | Yes | No  | T | C | C | C | homo | het  | het  |
| No  | chr10 | 22826093  | NM_005028    | 1506 | Yes | No  | No  | T | T | G | G | homo | homo | het  |
| No  | chr1  | 160303416 | NM_001098398 | 757  | No  | Yes | No  | C | T | T | T | het  | homo | homo |
| No  | chr10 | 116602805 | NM_020940    | 971  | No  | No  | Yes | A | G | A | G | het  | homo | het  |
| No  | chr17 | 76799860  | NM_025090    | 2742 | Yes | No  | Yes | A | A | G | G | homo | homo | het  |
| No  | chr2  | 71654175  | NM_001014972 | 5489 | Yes | No  | No  | G | G | A | G | homo | het  | homo |
| No  | chr20 | 46268493  | NM_001174087 | 3141 | Yes | No  | No  | A | A | G | G | homo | het  | het  |
| No  | chr20 | 4762736   | NM_170774    | 3218 | No  | No  | Yes | C | G | G | G | homo | het  | homo |
| No  | chr16 | 2049849   | NM_178167    | 1716 | No  | No  | Yes | A | G | A | G | het  | homo | het  |
| No  | chr8  | 11689119  | NM_004462    | 1124 | Yes | No  | No  | G | C | G | G | het  | homo | homo |
| No  | chr2  | 231331896 | NM_001206701 | 1398 | No  | Yes | No  | G | A | A | A | homo | het  | het  |
| No  | chr7  | 148877605 | NM_020781    | 2979 | Yes | No  | No  | C | C | T | C | homo | het  | homo |
| No  | chr1  | 150238699 | NR_045035    | 1292 | Yes | Yes | No  | A | A | G | G | homo | homo | het  |
| No  | chr15 | 85669452  | NM_001243137 | 2087 | Yes | No  | Yes | C | T | C | T | het  | homo | het  |
| No  | chr1  | 234740880 | NM_001077397 | 3750 | Yes | No  | No  | G | A | G | A | het  | homo | het  |
| No  | chr17 | 76672002  | NM_004762    | 1439 | No  | No  | Yes | A | A | G | G | homo | homo | het  |
| No  | chr5  | 112355668 | NR_038352    | 7694 | Yes | No  | No  | C | G | C | C | het  | homo | homo |
| No  | chr6  | 79911190  | NM_001201363 | 786  | Yes | No  | No  | C | T | C | T | het  | homo | het  |
| No  | chr9  | 131910644 | NM_178001    | 2265 | No  | No  | Yes | G | A | A | A | homo | het  | homo |
| No  | chr21 | 47642609  | NM_001145437 | 574  | No  | Yes | No  | C | T | C | T | homo | homo | het  |
| No  | chr11 | 75115893  | NM_001005    | 773  | Yes | Yes | No  | C | A | C | C | het  | homo | homo |
| No  | chr2  | 127453664 | NM_002101    | 662  | Yes | No  | No  | A | C | C | C | het  | homo | het  |
| Yes | chrX  | 119391880 | NM_006777    | 4838 | Yes | No  | No  | G | A | G | A | homo | homo | het  |
| No  | chr2  | 11911761  | NM_001261429 | 950  | Yes | No  | No  | C | C | T | C | homo | het  | homo |
| No  | chr19 | 16268832  | NM_032855    | 1817 | Yes | Yes | No  | A | G | A | A | het  | homo | homo |
| No  | chr19 | 35648365  | NM_014164    | 191  | Yes | No  | No  | T | G | T | G | het  | homo | het  |
| No  | chr6  | 90039670  | NM_016021    | 1016 | Yes | No  | No  | C | G | G | G | het  | homo | homo |
| No  | chr19 | 17312992  | NM_001130065 | 4868 | No  | Yes | Yes | C | T | C | T | homo | homo | het  |
| No  | chr11 | 64972286  | NR_040008    | 1410 | No  | Yes | No  | G | G | C | C | homo | het  | het  |
| No  | chr11 | 62378660  | NM_153265    | 659  | Yes | Yes | No  | C | C | T | T | homo | het  | het  |
| Yes | chr5  | 171481606 | NM_005990    | 2919 | Yes | Yes | Yes | T | C | T | C | homo | homo | het  |
| No  | chr12 | 122812503 | NM_001247997 | 3395 | Yes | No  | Yes | C | G | C | G | homo | homo | het  |
| No  | chr6  | 32627714  | NM_002123    | 1167 | Yes | No  | Yes | A | C | A | C | het  | homo | het  |
| Yes | chr16 | 88713236  | NM_000101    | 285  | Yes | No  | Yes | T | T | C | C | homo | homo | het  |
| No  | chr10 | 3206027   | NM_014889    | 750  | Yes | Yes | No  | T | C | C | C | het  | homo | homo |
| No  | chr2  | 105924510 | NM_001142621 | 330  | No  | Yes | No  | T | T | C | C | homo | het  | het  |
| No  | chr20 | 5933108   | NM_182802    | 618  | Yes | No  | No  | C | A | C | A | het  | homo | het  |

|     |       |           |              |      |     |     |     |   |   |   |   |      |      |      |
|-----|-------|-----------|--------------|------|-----|-----|-----|---|---|---|---|------|------|------|
| No  | chr10 | 116602805 | NM_001135051 | 971  | No  | No  | Yes | A | G | A | G | het  | homo | het  |
| No  | chr11 | 88070858  | NM_148170    | 84   | No  | Yes | No  | T | T | C | C | homo | het  | het  |
| No  | chr11 | 63991581  | NM_031472    | 791  | Yes | No  | No  | C | T | C | C | het  | homo | homo |
| No  | chr7  | 32526687  | NM_001130710 | 445  | Yes | Yes | No  | G | G | A | A | homo | het  | het  |
| No  | chr2  | 25469502  | NM_153759    | 817  | No  | No  | Yes | G | A | G | A | het  | homo | het  |
| No  | chr10 | 101639796 | NM_015221    | 4412 | Yes | No  | No  | C | T | T | T | het  | homo | het  |
| No  | chr6  | 90039344  | NM_016021    | 1342 | Yes | Yes | No  | A | C | A | A | het  | homo | homo |
| No  | chr11 | 44640268  | NM_001024844 | 894  | Yes | No  | No  | A | G | A | G | het  | homo | het  |
| No  | chr6  | 410848    | NM_001195286 | 4729 | No  | No  | Yes | A | G | G | A | het  | het  | homo |
| No  | chr5  | 96503523  | NM_001159749 | 1155 | Yes | No  | No  | G | A | A | A | het  | homo | het  |
| No  | chr9  | 117122202 | NM_030767    | 2427 | No  | Yes | No  | G | A | A | A | het  | het  | homo |
| No  | chr8  | 38709553  | NM_001146216 | 6755 | Yes | No  | Yes | C | C | T | C | homo | het  | homo |
| No  | chr1  | 224377724 | NM_003676    | 657  | No  | Yes | No  | C | T | C | C | het  | homo | homo |
| No  | chr1  | 55315941  | NM_014762    | 3645 | Yes | No  | Yes | C | A | C | A | het  | homo | het  |
| Yes | chr6  | 32412539  | NM_019111    | 996  | Yes | Yes | No  | A | A | G | G | homo | homo | het  |
| No  | chr10 | 97631492  | NM_001776    | 7209 | No  | Yes | No  | T | A | T | A | homo | homo | het  |
| No  | chr6  | 33048542  | NM_002121    | 310  | Yes | No  | No  | C | T | T | T | het  | homo | het  |
| No  | chr10 | 121700255 | NM_007190    | 3391 | No  | No  | Yes | C | T | T | T | het  | het  | homo |
| No  | chr5  | 126140522 | NM_001198557 | 147  | Yes | No  | No  | T | C | T | C | het  | homo | het  |
| No  | chr6  | 109688114 | NM_001142401 | 2676 | Yes | No  | No  | T | T | C | T | homo | het  | homo |
| No  | chr6  | 24535208  | NM_001080    | 2904 | Yes | No  | No  | C | A | C | A | het  | homo | het  |
| No  | chr16 | 2048826   | NM_178167    | 2253 | Yes | Yes | No  | G | C | C | C | homo | het  | het  |
| No  | chr19 | 18475073  | NM_017712    | 1394 | Yes | No  | No  | C | A | C | A | het  | homo | het  |
| No  | chr12 | 121878659 | NM_001005366 | 3770 | No  | Yes | No  | G | A | G | G | het  | homo | homo |
| No  | chr6  | 26414806  | NM_001145009 | 3553 | Yes | No  | No  | A | A | G | G | homo | het  | het  |
| No  | chr22 | 19025330  | NM_001173534 | 2817 | No  | Yes | No  | T | T | G | G | homo | het  | het  |
| No  | chr6  | 33032968  | NM_033554    | 1059 | Yes | No  | No  | C | C | T | T | homo | het  | het  |
| No  | chr6  | 410848    | NM_002460    | 4732 | No  | No  | Yes | A | G | G | A | het  | het  | homo |
| No  | chr1  | 1684169   | NM_001198994 | 2155 | No  | No  | Yes | G | C | C | G | het  | het  | homo |
| No  | chr1  | 161017556 | NM_181720    | 2968 | No  | Yes | No  | G | A | G | G | het  | homo | homo |
| No  | chr17 | 46970175  | NM_001002027 | 28   | Yes | Yes | No  | C | G | C | C | het  | homo | homo |
| No  | chr6  | 31603770  | NM_004638    | 5854 | No  | No  | Yes | A | G | A | G | het  | homo | het  |
| No  | chr7  | 150761680 | NM_001199693 | 351  | Yes | No  | No  | C | A | C | A | het  | homo | het  |
| No  | chr2  | 109301687 | NM_004987    | 2339 | Yes | Yes | No  | G | C | C | C | homo | het  | het  |
| No  | chr20 | 62522466  | NM_003288    | 1927 | No  | Yes | No  | A | G | G | G | homo | het  | het  |
| Yes | chr1  | 150266559 | NM_018997    | 291  | Yes | Yes | Yes | A | A | C | C | homo | homo | het  |
| No  | chr8  | 23292985  | NM_004901    | 1652 | No  | Yes | No  | T | T | C | C | homo | homo | het  |
| No  | chr19 | 18285944  | NM_006332    | 300  | No  | Yes | Yes | G | G | A | A | homo | homo | het  |
| No  | chr1  | 226549082 | NM_001618    | 3295 | No  | Yes | No  | C | T | C | C | het  | homo | homo |
| No  | chr12 | 109888482 | NM_031954    | 1948 | No  | No  | Yes | T | C | T | C | het  | homo | het  |
| No  | chr7  | 99633333  | NM_003439    | 3424 | Yes | No  | No  | T | T | C | C | homo | het  | het  |
| No  | chr10 | 35302705  | NM_001198778 | 2072 | No  | Yes | No  | G | A | G | G | het  | homo | homo |
| No  | chr19 | 7992126   | NM_006351    | 1477 | Yes | No  | No  | C | T | C | T | het  | homo | het  |
| No  | chr1  | 154556663 | NM_001025107 | 4411 | No  | No  | Yes | C | T | C | T | het  | homo | het  |
| No  | chr20 | 46268493  | NM_006534    | 3141 | Yes | No  | No  | A | A | G | G | homo | het  | het  |
| No  | chr3  | 42826041  | NM_001099669 | 1150 | Yes | Yes | No  | A | C | A | A | het  | homo | homo |
| No  | chr22 | 44489896  | NM_001003828 | 430  | Yes | Yes | No  | T | C | C | C | homo | het  | het  |
| No  | chr1  | 182356399 | NM_002065    | 1092 | No  | No  | Yes | T | C | C | T | het  | het  | homo |
| No  | chr12 | 24968069  | NM_001178093 | 4157 | No  | Yes | No  | A | G | G | G | het  | homo | homo |
| No  | chr5  | 176863519 | NM_001004106 | 1552 | No  | Yes | No  | G | C | C | G | het  | het  | homo |
| No  | chr9  | 90283514  | NM_004938    | 2301 | No  | Yes | No  | C | T | C | C | het  | homo | homo |
| No  | chr12 | 56814653  | NM_003920    | 3221 | No  | No  | Yes | C | T | T | T | homo | het  | homo |
| No  | chr12 | 24968150  | NM_001178093 | 4076 | Yes | No  | No  | T | G | G | G | het  | homo | homo |
| No  | chr22 | 21062168  | NM_058004    | 6563 | No  | No  | Yes | G | A | G | A | het  | homo | het  |
| No  | chr19 | 50411742  | NM_153719    | 1761 | Yes | No  | No  | T | C | C | C | homo | het  | homo |
| No  | chr6  | 36708917  | NM_020939    | 2977 | Yes | No  | Yes | T | A | T | A | het  | homo | het  |
| No  | chr6  | 32609207  | NM_002122    | 256  | No  | No  | Yes | C | T | C | T | het  | homo | het  |
| No  | chr7  | 24758795  | NM_004403    | 780  | Yes | No  | No  | A | G | A | G | het  | homo | het  |
| No  | chr22 | 43529314  | NM_173467    | 957  | Yes | No  | Yes | C | G | C | G | het  | homo | het  |
| No  | chr12 | 72180364  | NM_014999    | 1841 | Yes | No  | No  | G | G | A | A | homo | het  | het  |
| No  | chr7  | 50469981  | NM_001220774 | 2792 | No  | Yes | No  | T | C | T | T | het  | homo | homo |
| No  | chr12 | 21639421  | NM_002907    | 1038 | Yes | No  | Yes | A | T | A | T | het  | homo | het  |
| No  | chr6  | 31129707  | NM_007109    | 1492 | Yes | No  | No  | C | C | T | C | homo | het  | homo |



|     |       |           |              |      |     |     |     |   |   |   |   |      |      |      |
|-----|-------|-----------|--------------|------|-----|-----|-----|---|---|---|---|------|------|------|
| No  | chr6  | 33036853  | NM_001242525 | 693  | No  | Yes | No  | T | T | G | G | homo | het  | het  |
| No  | chr6  | 31602967  | NM_080686    | 5468 | Yes | No  | Yes | G | A | G | A | het  | homo | het  |
| No  | chr6  | 32609126  | NM_002122    | 175  | No  | No  | Yes | T | C | T | C | het  | homo | het  |
| No  | chr6  | 32780724  | NM_002120    | 1188 | Yes | No  | No  | C | T | C | T | het  | homo | het  |
| No  | chr10 | 99240758  | NM_022362    | 428  | Yes | No  | No  | C | G | G | G | het  | homo | het  |
| No  | chr4  | 186111639 | NM_020827    | 859  | No  | No  | Yes | A | G | A | G | het  | homo | het  |
| No  | chrX  | 2656261   | NM_001122898 | 622  | No  | Yes | No  | A | G | A | A | het  | homo | homo |
| No  | chr17 | 34415763  | NM_002983    | 636  | No  | No  | Yes | C | G | G | G | het  | het  | homo |
| No  | chr20 | 4764748   | NM_170774    | 1206 | Yes | No  | Yes | C | C | G | C | homo | het  | homo |
| No  | chr11 | 118619960 | NM_001257191 | 4667 | No  | Yes | No  | G | A | G | G | het  | homo | homo |
| No  | chr22 | 38151170  | NM_138632    | 415  | No  | Yes | No  | G | G | A | A | homo | het  | het  |
| No  | chr3  | 191075902 | NM_174908    | 818  | Yes | No  | No  | C | T | C | T | het  | homo | het  |
| Yes | chr2  | 29001691  | NM_206876    | 361  | Yes | Yes | No  | A | A | G | G | homo | homo | het  |
| No  | chr3  | 105260518 | NM_001627    | 1596 | No  | Yes | No  | G | A | A | A | het  | het  | homo |
| No  | chr20 | 463995    | NM_177560    | 1852 | No  | No  | Yes | A | A | G | A | homo | het  | homo |
| No  | chrX  | 102930960 | NM_001142431 | 1329 | No  | No  | Yes | T | C | C | C | homo | het  | homo |
| No  | chr13 | 25052393  | NM_006437    | 1576 | No  | Yes | No  | C | C | A | A | homo | het  | het  |
| No  | chr10 | 105362209 | NM_014631    | 2822 | Yes | No  | Yes | A | G | G | G | het  | homo | het  |
| No  | chr3  | 196613072 | NM_152699    | 1269 | No  | No  | Yes | A | A | C | C | homo | homo | het  |
| No  | chr7  | 29960812  | NM_001145513 | 4183 | No  | Yes | No  | A | A | T | T | homo | het  | het  |
| No  | chr6  | 5109592   | NM_020408    | 547  | No  | No  | Yes | A | C | C | C | het  | homo | het  |
| No  | chr6  | 44371714  | NM_001253    | 1018 | Yes | Yes | No  | C | T | C | C | het  | homo | homo |
| No  | chr2  | 75882656  | NM_014763    | 1149 | Yes | No  | No  | G | A | G | A | het  | homo | het  |
| No  | chr14 | 102446161 | NM_001376    | 788  | No  | Yes | No  | G | A | G | G | het  | homo | homo |
| No  | chr1  | 154561925 | NM_001111    | 2924 | Yes | No  | No  | G | A | G | G | het  | homo | homo |
| No  | chr19 | 49954807  | NM_017916    | 309  | Yes | No  | No  | A | C | C | C | het  | homo | het  |
| No  | chr19 | 35739702  | NM_015925    | 144  | No  | No  | Yes | G | G | A | G | homo | het  | homo |
| No  | chr1  | 146740502 | NM_001256336 | 1006 | Yes | No  | Yes | C | C | G | C | homo | het  | homo |
| No  | chr17 | 79225026  | NM_138570    | 2707 | Yes | Yes | No  | G | G | A | A | homo | het  | het  |
| No  | chr2  | 232035429 | NM_002807    | 3027 | Yes | No  | Yes | G | A | G | A | het  | homo | het  |
| No  | chr19 | 47585517  | NM_015168    | 1292 | Yes | Yes | No  | C | G | G | G | homo | het  | het  |
| No  | chr6  | 32627763  | NM_001243961 | 1142 | No  | No  | Yes | T | T | A | A | homo | homo | het  |
| No  | chrX  | 102930960 | NM_001142426 | 1298 | No  | No  | Yes | T | C | C | C | homo | het  | homo |
| No  | chr4  | 1981256   | NM_133330    | 5212 | Yes | No  | Yes | T | G | T | G | het  | homo | het  |
| Yes | chr7  | 5567112   | NM_001101    | 1479 | Yes | No  | No  | G | G | A | A | homo | homo | het  |
| No  | chr9  | 130938661 | NM_001131017 | 1892 | Yes | No  | No  | G | G | A | A | homo | het  | het  |
| No  | chr4  | 10076860  | NM_017491    | 2246 | Yes | No  | Yes | C | T | C | T | het  | homo | het  |
| No  | chr2  | 242292307 | NM_004404    | 2175 | No  | No  | Yes | T | C | T | C | het  | homo | het  |
| No  | chr17 | 7215536   | NM_001143760 | 1010 | Yes | Yes | No  | T | C | T | C | homo | homo | het  |
| No  | chr5  | 112355668 | NM_152624    | 7974 | Yes | No  | No  | C | G | C | C | het  | homo | homo |
| No  | chr8  | 38709553  | NM_006283    | 6809 | Yes | No  | Yes | C | C | T | C | homo | het  | homo |
| No  | chr2  | 71654175  | NM_001252613 | 5499 | Yes | No  | No  | G | G | A | G | homo | het  | homo |
| No  | chr21 | 34614255  | NM_207584    | 356  | No  | No  | Yes | T | G | T | G | het  | homo | het  |
| No  | chr3  | 124802231 | NM_001195483 | 2698 | No  | Yes | No  | A | G | G | G | het  | homo | homo |
| No  | chr19 | 3578653   | NM_006339    | 1156 | No  | Yes | Yes | C | C | T | T | homo | homo | het  |
| No  | chr17 | 55478748  | NM_138962    | 494  | No  | No  | Yes | A | G | A | G | het  | homo | het  |
| No  | chr1  | 228681749 | NM_001010858 | 993  | No  | No  | Yes | C | T | T | T | het  | het  | homo |
| Yes | chr2  | 240946766 | NM_004544    | 872  | Yes | Yes | No  | A | G | A | G | homo | homo | het  |
| No  | chr2  | 191874667 | NM_007315    | 451  | No  | No  | Yes | T | C | T | C | het  | homo | het  |
| No  | chr16 | 85009291  | NM_001145548 | 2049 | Yes | No  | No  | A | G | A | A | het  | homo | homo |
| No  | chr1  | 146740502 | NM_001256337 | 583  | Yes | No  | Yes | C | C | G | C | homo | het  | homo |
| No  | chr2  | 207024107 | NM_001199983 | 137  | No  | Yes | No  | C | C | G | G | homo | het  | het  |
| No  | chr7  | 50469981  | NM_001220769 | 2984 | Yes | No  | No  | T | C | T | T | het  | homo | homo |
| No  | chr8  | 27308585  | NM_173176    | 2753 | Yes | No  | Yes | A | A | C | C | homo | homo | het  |
| No  | chr9  | 130938661 | NM_001131016 | 2075 | Yes | No  | No  | G | G | A | A | homo | het  | het  |
| No  | chr5  | 150410219 | NM_001252385 | 2224 | Yes | No  | No  | G | T | G | T | het  | homo | het  |
| No  | chr12 | 55343628  | NM_001261844 | 2073 | Yes | No  | No  | T | C | C | C | het  | homo | homo |
| No  | chr17 | 76131070  | NM_152468    | 1489 | No  | Yes | No  | G | A | G | G | het  | homo | homo |
| No  | chr5  | 150410219 | NM_001252393 | 2133 | Yes | No  | No  | G | T | G | T | het  | homo | het  |
| No  | chr6  | 64293010  | NM_003463    | 4603 | Yes | Yes | No  | G | A | G | G | het  | homo | homo |
| No  | chr16 | 12061626  | NM_001192    | 695  | Yes | No  | No  | G | A | G | G | het  | homo | homo |
| Yes | chr17 | 37921742  | NM_001257414 | 1491 | Yes | No  | No  | G | A | G | A | homo | homo | het  |
| No  | chr16 | 11647492  | NM_001136473 | 344  | Yes | No  | No  | A | G | A | G | het  | homo | het  |

|     |       |           |              |       |     |     |     |   |   |   |   |      |      |      |
|-----|-------|-----------|--------------|-------|-----|-----|-----|---|---|---|---|------|------|------|
| No  | chr8  | 42174380  | NM_001242778 | 1174  | No  | Yes | No  | G | G | A | A | homo | het  | het  |
| No  | chr7  | 24758753  | NM_001127454 | 592   | No  | No  | Yes | G | A | G | A | het  | homo | het  |
| No  | chr3  | 150260853 | NM_014445    | 2099  | No  | No  | Yes | G | A | A | A | het  | het  | homo |
| No  | chr6  | 107017654 | NM_001624    | 6872  | Yes | No  | Yes | G | G | A | G | homo | het  | homo |
| No  | chr6  | 31583827  | NM_004847    | 520   | No  | Yes | No  | T | T | G | G | homo | homo | het  |
| No  | chr17 | 80350331  | NM_175902    | 1268  | No  | No  | Yes | C | T | C | T | het  | homo | het  |
| No  | chr6  | 33036853  | NM_033554    | 678   | No  | Yes | No  | T | T | G | G | homo | het  | het  |
| No  | chr11 | 71155153  | NM_001163817 | 457   | No  | Yes | No  | T | C | C | C | het  | homo | homo |
| No  | chr17 | 38974612  | NM_000421    | 1897  | No  | No  | Yes | A | A | G | A | homo | het  | homo |
| No  | chr2  | 75099477  | NM_000189    | 2352  | No  | No  | Yes | A | A | T | A | homo | het  | homo |
| No  | chr20 | 4764576   | NM_014737    | 1520  | No  | No  | Yes | G | G | A | G | homo | het  | homo |
| No  | chr19 | 47113138  | NM_005184    | 1358  | Yes | No  | No  | A | G | G | G | homo | het  | homo |
| No  | chr7  | 99694931  | NM_182776    | 1783  | Yes | No  | No  | G | A | G | A | het  | homo | het  |
| No  | chr4  | 6599928   | NM_015274    | 1288  | Yes | No  | No  | C | C | A | C | homo | het  | homo |
| No  | chr17 | 25628820  | NM_015626    | 363   | Yes | No  | No  | T | C | C | C | homo | het  | het  |
| No  | chr1  | 154573967 | NM_001111    | 1393  | No  | Yes | No  | A | G | G | G | het  | homo | homo |
| No  | chr11 | 64009879  | NM_004470    | 216   | Yes | No  | No  | G | A | G | G | het  | homo | homo |
| No  | chr6  | 89322239  | NM_003800    | 2213  | Yes | No  | No  | G | G | A | A | homo | het  | het  |
| No  | chr2  | 11911761  | NM_001261427 | 847   | Yes | No  | No  | C | C | T | C | homo | het  | homo |
| No  | chr22 | 30987861  | NM_001243225 | 67    | No  | Yes | No  | C | G | G | G | het  | het  | homo |
| No  | chr2  | 182374534 | NM_000885    | 2608  | No  | Yes | No  | A | A | G | G | homo | het  | het  |
| No  | chr20 | 4764682   | NM_014737    | 1414  | Yes | No  | Yes | A | G | G | G | homo | het  | homo |
| No  | chr4  | 42412687  | NM_001105529 | 5928  | No  | No  | Yes | A | C | C | C | homo | het  | homo |
| No  | chr4  | 68484396  | NM_018227    | 3530  | No  | Yes | No  | C | C | T | T | homo | het  | het  |
| No  | chr12 | 125284748 | NM_001082959 | 1303  | Yes | No  | No  | T | C | T | T | het  | homo | homo |
| Yes | chr10 | 3178881   | NM_001242339 | 2665  | Yes | Yes | No  | C | C | T | T | homo | homo | het  |
| No  | chr5  | 156821217 | NM_001037333 | 5109  | No  | Yes | No  | T | T | C | C | homo | homo | het  |
| No  | chr4  | 88060025  | NM_001166693 | 7104  | Yes | No  | No  | C | A | A | A | homo | het  | homo |
| No  | chr4  | 1981256   | NM_133335    | 4857  | Yes | No  | Yes | T | G | T | G | het  | homo | het  |
| No  | chr11 | 85692181  | NM_001206947 | 1652  | Yes | No  | No  | T | G | G | G | homo | het  | het  |
| No  | chr1  | 21573722  | NM_001397    | 1230  | No  | Yes | No  | C | T | C | C | het  | homo | homo |
| No  | chr12 | 24968069  | NM_001178092 | 4378  | No  | Yes | No  | A | G | G | G | het  | homo | homo |
| No  | chr3  | 42636141  | NM_016305    | 466   | No  | No  | Yes | G | A | A | G | het  | het  | homo |
| No  | chr17 | 42430244  | NM_002087    | 2079  | No  | Yes | No  | C | C | T | T | homo | het  | het  |
| No  | chr6  | 33036505  | NM_001242525 | 827   | No  | Yes | No  | C | C | G | G | homo | het  | het  |
| No  | chr1  | 14105298  | NM_015866    | 1864  | Yes | No  | No  | G | A | G | A | het  | homo | het  |
| No  | chr8  | 81885077  | NM_018440    | 5712  | Yes | No  | Yes | T | C | C | C | homo | het  | homo |
| No  | chr4  | 38774889  | NM_001017388 | 2455  | No  | Yes | No  | A | G | A | G | homo | homo | het  |
| No  | chr17 | 4622638   | NM_004313    | 1068  | No  | No  | Yes | C | C | T | T | homo | homo | het  |
| No  | chr4  | 119200274 | NR_034010    | 207   | Yes | Yes | No  | C | T | T | T | het  | homo | homo |
| No  | chr1  | 64097432  | NM_002633    | 874   | No  | No  | Yes | C | T | T | C | het  | het  | homo |
| No  | chr12 | 113596866 | NM_024072    | 2490  | Yes | No  | No  | C | T | C | C | het  | homo | homo |
| No  | chr11 | 85692181  | NM_001206946 | 2066  | Yes | No  | No  | T | G | G | G | homo | het  | het  |
| No  | chr1  | 14105298  | NM_001007257 | 604   | Yes | No  | No  | G | A | G | A | het  | homo | het  |
| No  | chr1  | 21573722  | NM_001113348 | 1270  | No  | Yes | No  | C | T | C | C | het  | homo | homo |
| No  | chr6  | 155606325 | NM_016020    | 688   | No  | Yes | No  | G | A | G | A | homo | homo | het  |
| No  | chr22 | 45723854  | NM_001104595 | 1048  | Yes | Yes | No  | C | G | C | C | het  | homo | homo |
| No  | chr11 | 62574587  | NM_003164    | 1579  | No  | No  | Yes | G | G | T | G | homo | het  | homo |
| No  | chr16 | 66646591  | NM_144601    | 906   | No  | Yes | No  | C | C | T | T | homo | het  | het  |
| No  | chr20 | 4764748   | NM_014737    | 1348  | Yes | No  | Yes | C | C | G | C | homo | het  | homo |
| No  | chr8  | 80976814  | NM_005079    | 192   | Yes | No  | No  | G | G | T | T | homo | het  | het  |
| No  | chr8  | 27255146  | NM_173174    | 853   | No  | Yes | Yes | G | G | A | A | homo | homo | het  |
| Yes | chr16 | 58579274  | NM_016284    | 4461  | Yes | No  | No  | G | A | G | A | homo | homo | het  |
| No  | chr6  | 32813756  | NR_037176    | 751   | Yes | Yes | No  | G | G | A | A | homo | het  | het  |
| No  | chr7  | 36895342  | NR_038121    | 905   | No  | Yes | Yes | G | G | A | A | homo | homo | het  |
| No  | chr20 | 47267480  | NM_020820    | 2792  | Yes | No  | No  | T | T | C | C | homo | het  | het  |
| No  | chr21 | 34614255  | NM_000874    | 402   | No  | No  | Yes | T | G | T | G | het  | homo | het  |
| No  | chr2  | 55883317  | NM_033109    | 1443  | No  | Yes | Yes | C | A | A | C | het  | het  | homo |
| No  | chr14 | 53503668  | NM_030637    | 12667 | No  | No  | Yes | G | A | G | A | het  | homo | het  |
| No  | chr16 | 2569810   | NM_001694    | 766   | No  | Yes | No  | G | G | C | C | homo | het  | het  |
| No  | chr14 | 53503668  | NM_001160148 | 12751 | No  | No  | Yes | G | A | G | A | het  | homo | het  |
| No  | chr17 | 55478748  | NM_170721    | 344   | No  | No  | Yes | A | G | A | G | het  | homo | het  |
| No  | chr16 | 11016045  | NM_000246    | 3304  | Yes | No  | No  | C | T | C | C | het  | homo | homo |

|     |       |           |                   |      |     |     |     |   |   |   |   |      |      |      |
|-----|-------|-----------|-------------------|------|-----|-----|-----|---|---|---|---|------|------|------|
| No  | chr19 | 50411742  | NM_016553         | 1928 | Yes | No  | No  | T | C | C | C | homo | het  | homo |
| No  | chr8  | 27311703  | NM_004103         | 2881 | Yes | Yes | No  | T | C | C | C | het  | homo | homo |
| No  | chr16 | 11647492  | NM_001136472      | 344  | Yes | No  | No  | A | G | A | G | het  | homo | het  |
| No  | chr22 | 43203137  | NM_014570         | 1573 | Yes | No  | Yes | G | A | G | A | het  | homo | het  |
| No  | chr22 | 36556823  | NR_027834         | 155  | No  | No  | Yes | C | A | A | A | het  | homo | het  |
| No  | chr1  | 161013121 | NM_207005         | 140  | Yes | No  | Yes | G | A | A | A | homo | het  | homo |
| No  | chr12 | 93862989  | NM_172177         | 90   | Yes | No  | No  | G | A | G | A | het  | homo | het  |
| No  | chr19 | 36207102  | NM_014383         | 1302 | Yes | No  | No  | G | G | A | A | homo | het  | het  |
| No  | chr1  | 150594701 | NM_207045         | 1049 | No  | Yes | No  | G | A | G | G | het  | homo | homo |
| No  | chr11 | 18424487  | NM_001135239      | 617  | No  | Yes | No  | A | G | A | G | homo | homo | het  |
| No  | chr19 | 10939792  | NM_001005361      | 2329 | Yes | No  | No  | T | T | C | C | homo | het  | het  |
| No  | chr5  | 150410219 | NM_001258455      | 1810 | Yes | No  | No  | G | T | G | T | het  | homo | het  |
| No  | chr2  | 85808982  | NM_003761         | 602  | Yes | No  | No  | T | T | C | C | homo | het  | het  |
| No  | chr6  | 32605216  | NM_002122         | 34   | Yes | No  | Yes | G | A | G | A | het  | homo | het  |
| No  | chr2  | 202029160 | NM_003879         | 2372 | No  | No  | Yes | G | T | T | G | het  | het  | homo |
| No  | chr7  | 43678997  | ENST00000310564.6 | 944  | No  | No  | Yes | A | G | G | G | het  | homo | het  |
| No  | chr2  | 30481917  | NM_030915         | 1956 | Yes | No  | No  | G | G | A | G | homo | het  | homo |
| No  | chr1  | 2494329   | NM_003820         | 1019 | Yes | No  | No  | C | T | C | T | het  | homo | het  |
| No  | chr21 | 26972144  | NM_017446         | 569  | No  | Yes | No  | G | T | G | G | het  | homo | homo |
| Yes | chr8  | 27255080  | NM_173174         | 787  | Yes | Yes | No  | A | A | G | G | homo | homo | het  |
| No  | chr16 | 87788833  | NM_001184854      | 267  | Yes | No  | No  | C | C | A | C | homo | het  | homo |
| No  | chr12 | 54357495  | NR_047517         | 965  | No  | No  | Yes | G | C | G | C | het  | homo | het  |
| No  | chr19 | 1272040   | NM_001280         | 641  | Yes | No  | No  | T | C | C | C | het  | homo | homo |
| No  | chr18 | 29104714  | NM_001943         | 1065 | No  | No  | Yes | A | A | G | A | homo | het  | homo |
| No  | chr3  | 196663321 | NM_001042540      | 963  | Yes | No  | No  | C | A | A | A | het  | homo | het  |
| No  | chr19 | 18306990  | NM_032683         | 798  | Yes | Yes | No  | G | C | G | G | het  | homo | homo |
| Yes | chr6  | 31637734  | NM_001320         | 1019 | Yes | Yes | No  | A | A | T | T | homo | homo | het  |
| No  | chr2  | 27016988  | NM_001042426      | 883  | Yes | Yes | No  | C | T | T | T | homo | het  | het  |
| No  | chr6  | 410848    | NR_046000         | 4863 | No  | No  | Yes | A | G | G | A | het  | het  | homo |
| No  | chr13 | 111955907 | NM_001113513      | 2772 | Yes | No  | No  | T | C | C | C | homo | het  | het  |
| No  | chr6  | 116720487 | NM_001080976      | 268  | Yes | No  | Yes | C | T | T | T | het  | homo | het  |
| No  | chr4  | 25749419  | NM_015187         | 4179 | Yes | No  | No  | A | A | G | G | homo | het  | het  |
| No  | chr1  | 154561925 | NM_015840         | 2846 | Yes | No  | No  | G | A | G | G | het  | homo | homo |
| No  | chr10 | 97631492  | NM_001164182      | 7058 | No  | Yes | No  | T | A | T | A | homo | homo | het  |
| No  | chr5  | 32125842  | NM_022130         | 1658 | No  | No  | Yes | C | A | C | A | het  | homo | het  |
| No  | chr7  | 139288937 | NM_022740         | 2416 | Yes | No  | No  | G | A | G | G | het  | homo | homo |
| No  | chr16 | 24582299  | NM_006910         | 4952 | No  | Yes | No  | C | G | C | C | het  | homo | homo |
| No  | chr22 | 36537500  | NM_145641         | 2504 | Yes | No  | No  | T | T | A | A | homo | homo | het  |
| No  | chr5  | 95091194  | NM_014899         | 1314 | No  | Yes | No  | C | C | T | T | homo | het  | het  |
| No  | chr6  | 38650628  | NM_006708         | 454  | No  | Yes | No  | A | A | C | C | homo | het  | het  |
| No  | chr17 | 41244000  | NM_007297         | 3688 | Yes | No  | No  | A | A | G | G | homo | het  | het  |
| No  | chr3  | 44906746  | NM_144638         | 563  | Yes | No  | No  | A | G | G | G | homo | het  | homo |
| No  | chr2  | 160676350 | NM_001198759      | 4114 | Yes | Yes | No  | A | A | G | G | homo | het  | het  |
| No  | chr19 | 4859937   | NM_001164189      | 343  | Yes | No  | No  | A | G | G | G | homo | het  | het  |
| Yes | chr12 | 124957627 | NM_001077261      | 783  | Yes | No  | No  | G | A | G | A | homo | homo | het  |
| No  | chr6  | 36709065  | NM_020939         | 2829 | Yes | No  | Yes | C | G | C | G | het  | homo | het  |
| No  | chr8  | 80976814  | NM_001025253      | 192  | Yes | No  | No  | G | G | T | T | homo | het  | het  |
| No  | chr10 | 64914467  | NM_030759         | 1577 | No  | Yes | No  | A | A | G | G | homo | het  | het  |
| No  | chr6  | 32629129  | NM_002123         | 849  | Yes | Yes | No  | A | A | G | G | homo | homo | het  |
| No  | chr17 | 12895855  | NM_018127         | 2878 | Yes | No  | No  | T | A | A | A | homo | het  | homo |
| No  | chr13 | 114154419 | NM_017905         | 1132 | No  | No  | Yes | G | G | A | G | homo | het  | homo |
| No  | chrX  | 100604757 | NM_000061         | 2289 | Yes | Yes | No  | A | A | C | C | homo | het  | het  |
| No  | chr9  | 115931692 | NM_015258         | 3415 | Yes | No  | No  | T | C | T | T | het  | homo | homo |
| No  | chr7  | 36895342  | NR_038120         | 792  | No  | Yes | Yes | G | G | A | A | homo | homo | het  |
| No  | chr1  | 46078884  | NM_152298         | 612  | No  | No  | Yes | C | T | T | C | het  | het  | homo |
| No  | chr16 | 12665244  | NM_032167         | 5262 | Yes | Yes | No  | G | G | T | T | homo | homo | het  |
| No  | chr10 | 3189380   | NM_001242307      | 2370 | Yes | No  | Yes | G | G | A | A | homo | homo | het  |
| No  | chr9  | 135982088 | NM_001042368      | 1517 | Yes | No  | Yes | T | T | G | T | homo | het  | homo |
| No  | chr12 | 107367439 | NM_152261         | 2995 | Yes | No  | Yes | A | G | A | G | het  | homo | het  |
| No  | chr11 | 62621044  | NR_003098         | 334  | Yes | Yes | No  | A | C | A | A | het  | homo | homo |
| No  | chr20 | 43530234  | NM_139323         | 247  | Yes | No  | No  | A | C | C | C | het  | homo | homo |
| No  | chr2  | 198362018 | NM_002156         | 410  | Yes | No  | No  | A | G | G | G | het  | homo | het  |
| No  | chr22 | 39131727  | NM_001199579      | 3056 | Yes | No  | Yes | A | A | C | A | homo | het  | homo |

|     |       |           |                   |       |     |     |     |   |   |   |   |      |      |      |
|-----|-------|-----------|-------------------|-------|-----|-----|-----|---|---|---|---|------|------|------|
| No  | chr2  | 202029160 | NM_001127183      | 2400  | No  | No  | Yes | G | T | T | G | het  | het  | homo |
| No  | chr5  | 52942197  | NM_002495         | 340   | No  | No  | Yes | A | G | G | G | homo | het  | homo |
| No  | chr9  | 139317869 | NM_015160         | 1736  | No  | Yes | Yes | T | C | C | T | het  | het  | homo |
| No  | chr12 | 46662485  | NM_030674         | 724   | Yes | Yes | No  | C | G | C | C | het  | homo | homo |
| No  | chr14 | 74759477  | NR_003256         | 934   | Yes | No  | No  | G | G | A | G | homo | het  | homo |
| No  | chr1  | 53676448  | NM_000098         | 1617  | No  | No  | Yes | G | A | A | A | homo | het  | homo |
| No  | chr12 | 26490349  | NM_002223         | 10504 | No  | Yes | No  | G | A | G | G | het  | homo | homo |
| No  | chr17 | 7217463   | ENST00000575474.1 | 1825  | No  | No  | Yes | A | G | A | G | homo | homo | het  |
| No  | chr13 | 114782779 | NM_007368         | 1271  | No  | Yes | No  | C | T | C | C | het  | homo | homo |
| No  | chr2  | 86385728  | NM_001100169      | 1534  | Yes | No  | Yes | G | G | A | G | homo | het  | homo |
| No  | chr2  | 232035429 | NM_001191037      | 2934  | Yes | No  | Yes | G | A | G | A | het  | homo | het  |
| No  | chr7  | 43678997  | ENST00000223336.6 | 719   | No  | No  | Yes | A | G | G | G | het  | homo | het  |
| No  | chr11 | 71155153  | NM_001360         | 480   | No  | Yes | No  | T | C | C | C | het  | homo | homo |
| No  | chr1  | 118067306 | NM_006699         | 4374  | Yes | No  | No  | T | A | A | A | het  | homo | homo |
| No  | chr18 | 9275542   | NM_001083625      | 5979  | No  | Yes | No  | C | T | C | C | het  | homo | homo |
| No  | chr22 | 32881190  | NM_012179         | 1064  | No  | Yes | No  | G | A | G | G | het  | homo | homo |
| No  | chr5  | 140027216 | NM_002488         | 155   | No  | No  | Yes | A | G | G | A | het  | het  | homo |
| No  | chr1  | 46827728  | NM_001256127      | 1960  | Yes | No  | No  | A | A | C | A | homo | het  | homo |
| No  | chr12 | 57004268  | NM_013449         | 1904  | No  | Yes | No  | C | T | C | C | het  | homo | homo |
| No  | chr8  | 17819572  | NM_006197         | 2774  | Yes | No  | No  | C | T | T | T | homo | het  | het  |
| No  | chr14 | 23044004  | NM_001344         | 421   | Yes | No  | No  | G | G | A | A | homo | het  | het  |
| No  | chr9  | 139371342 | NM_014866         | 1035  | No  | No  | Yes | C | T | T | C | het  | het  | homo |
| No  | chr6  | 79911190  | NM_001201362      | 1242  | Yes | No  | No  | C | T | C | T | het  | homo | het  |
| No  | chr11 | 18424487  | NM_001165415      | 791   | No  | Yes | No  | A | G | A | G | homo | homo | het  |
| No  | chr9  | 93641151  | NM_001174168      | 1550  | Yes | Yes | No  | T | C | T | T | het  | homo | homo |
| No  | chr7  | 29960812  | NM_001145514      | 4115  | No  | Yes | No  | A | A | T | T | homo | het  | het  |
| No  | chr4  | 1981256   | NM_001042424      | 4894  | Yes | No  | Yes | T | G | T | G | het  | homo | het  |
| No  | chr9  | 2191309   | NM_139045         | 4683  | Yes | No  | No  | C | C | G | C | homo | het  | homo |
| Yes | chr1  | 101704532 | NM_001400         | 506   | Yes | Yes | No  | G | G | T | T | homo | homo | het  |
| No  | chr15 | 40686087  | NM_001142762      | 1293  | Yes | No  | Yes | T | T | C | T | homo | het  | homo |
| No  | chr6  | 32629868  | NM_001243961      | 619   | Yes | Yes | No  | T | T | C | C | homo | homo | het  |
| No  | chr12 | 109888886 | NM_031954         | 1544  | Yes | No  | No  | G | G | A | G | homo | het  | homo |
| No  | chr22 | 39131727  | NM_001199580      | 2992  | Yes | No  | Yes | A | A | C | A | homo | het  | homo |
| No  | chr1  | 212619339 | NR_026598         | 506   | Yes | No  | No  | T | C | T | T | het  | homo | homo |
| No  | chr3  | 14528028  | NM_001134367      | 3675  | No  | Yes | No  | T | C | C | T | het  | het  | homo |
| No  | chr15 | 63918307  | NM_003922         | 13300 | Yes | No  | No  | C | G | G | G | het  | homo | het  |
| No  | chr17 | 42475983  | NR_036474         | 3699  | No  | No  | Yes | C | G | G | C | het  | het  | homo |
| No  | chr22 | 30987861  | NM_014303         | 67    | No  | Yes | No  | C | G | G | G | het  | het  | homo |
| No  | chr9  | 131073221 | NM_015679         | 625   | Yes | No  | No  | G | A | G | G | het  | homo | homo |
| No  | chr12 | 24968069  | NM_001178091      | 4450  | No  | Yes | No  | A | G | G | G | het  | homo | homo |
| No  | chr2  | 109301687 | NM_001193482      | 2309  | Yes | Yes | No  | G | C | C | C | homo | het  | het  |
| No  | chr6  | 33169895  | NM_006979         | 1047  | Yes | No  | No  | C | C | G | G | homo | het  | het  |
| No  | chr11 | 118619960 | NM_004397         | 4739  | No  | Yes | No  | G | A | G | G | het  | homo | homo |
| No  | chr7  | 50470156  | NM_001220768      | 3285  | Yes | No  | No  | G | C | G | G | het  | homo | homo |
| No  | chr22 | 41928145  | NM_001018052      | 599   | No  | No  | Yes | C | C | T | C | homo | het  | homo |
| No  | chr19 | 35739702  | NM_205835         | 144   | No  | No  | Yes | G | G | A | G | homo | het  | homo |
| No  | chr16 | 2569810   | ENST00000564543.1 | 1535  | No  | Yes | No  | G | G | C | C | homo | het  | het  |
| No  | chr6  | 31131276  | NM_007109         | 2590  | Yes | No  | No  | A | A | T | A | homo | het  | homo |
| No  | chr10 | 35772402  | NM_145012         | 405   | No  | No  | Yes | G | G | A | G | homo | het  | homo |
| No  | chr14 | 100801331 | NM_213645         | 1282  | Yes | No  | No  | G | A | G | A | het  | homo | het  |
| No  | chr10 | 95259979  | NM_018131         | 475   | Yes | Yes | No  | C | G | C | C | het  | homo | homo |
| No  | chr1  | 93617546  | NM_001167830      | 3867  | No  | Yes | No  | A | G | G | G | het  | homo | homo |
| No  | chr5  | 169509929 | NM_004946         | 5640  | No  | No  | Yes | G | A | G | A | homo | homo | het  |
| No  | chr17 | 79977215  | NM_144998         | 167   | Yes | No  | Yes | C | T | C | T | het  | homo | het  |
| No  | chr12 | 24967212  | NM_001178094      | 5311  | Yes | No  | No  | G | A | A | A | het  | homo | homo |
| No  | chr5  | 176867943 | NM_001004105      | 1726  | No  | Yes | No  | A | G | G | A | het  | het  | homo |
| No  | chr1  | 19950062  | NM_001204082      | 228   | Yes | No  | Yes | T | C | T | C | het  | homo | het  |
| No  | chr12 | 93862989  | NR_038159         | 90    | Yes | No  | No  | G | A | G | A | het  | homo | het  |
| No  | chr6  | 32813756  | NR_037174         | 839   | Yes | Yes | No  | G | G | A | A | homo | het  | het  |
| Yes | chr19 | 10370542  | NM_146388         | 2210  | Yes | Yes | No  | C | T | C | T | homo | homo | het  |
| No  | chr6  | 32627807  | NM_002123         | 1074  | No  | No  | Yes | T | T | A | A | homo | homo | het  |
| Yes | chr8  | 27255080  | NM_004103         | 232   | Yes | Yes | No  | A | A | G | G | homo | homo | het  |
| No  | chr19 | 11123738  | NM_001128846      | 2388  | Yes | No  | No  | C | T | C | C | het  | homo | homo |

|     |       |           |                   |      |     |     |     |   |   |   |   |      |      |      |
|-----|-------|-----------|-------------------|------|-----|-----|-----|---|---|---|---|------|------|------|
| No  | chr19 | 4859937   | NM_005817         | 343  | Yes | No  | No  | A | G | G | G | homo | het  | het  |
| No  | chr20 | 54979035  | NM_001033522      | 1745 | No  | No  | Yes | G | A | G | A | het  | homo | het  |
| No  | chr5  | 167933156 | NM_002887         | 1229 | Yes | Yes | No  | A | G | A | A | het  | homo | homo |
| No  | chr4  | 38774889  | NM_030956         | 2961 | No  | Yes | No  | A | G | A | G | homo | homo | het  |
| No  | chr5  | 132093994 | NM_001098812      | 1779 | Yes | No  | No  | G | A | G | G | het  | homo | homo |
| No  | chr6  | 32814902  | NM_000593         | 2318 | No  | Yes | No  | G | G | A | A | homo | het  | het  |
| Yes | chr17 | 43183108  | NM_021079         | 1610 | Yes | No  | No  | G | A | G | A | homo | homo | het  |
| No  | chr14 | 24587639  | NR_028100         | 877  | No  | Yes | No  | G | A | G | G | het  | homo | homo |
| No  | chr22 | 50319079  | NM_001135101      | 1165 | Yes | Yes | No  | T | T | G | G | homo | het  | het  |
| No  | chr8  | 87567193  | NM_003909         | 1397 | No  | Yes | No  | C | T | C | C | het  | homo | homo |
| No  | chr2  | 217070248 | NM_021141         | 2662 | Yes | No  | No  | T | C | T | C | het  | homo | het  |
| No  | chr9  | 123614604 | ENST00000447891.1 | 1472 | No  | Yes | No  | C | C | A | A | homo | homo | het  |
| No  | chr5  | 179297268 | NM_015043         | 2747 | Yes | Yes | No  | C | C | T | T | homo | het  | het  |
| No  | chr19 | 55143491  | NM_001081639      | 689  | No  | Yes | No  | G | G | T | T | homo | het  | het  |
| No  | chr4  | 10076658  | NM_017491         | 2448 | No  | No  | Yes | A | G | A | G | het  | homo | het  |
| No  | chr9  | 131910644 | NM_021131         | 2086 | No  | No  | Yes | G | A | A | A | homo | het  | homo |
| No  | chr11 | 18424451  | NM_001165416      | 755  | Yes | No  | Yes | C | T | C | T | homo | homo | het  |
| Yes | chr13 | 21720956  | NM_005870         | 291  | Yes | Yes | No  | C | C | T | T | homo | homo | het  |
| No  | chr3  | 170893070 | NM_015028         | 1089 | No  | No  | Yes | C | T | C | T | het  | homo | het  |
| Yes | chr8  | 27255263  | NM_173176         | 402  | Yes | No  | No  | A | A | G | G | homo | homo | het  |
| No  | chr19 | 18288069  | NM_006332         | 676  | No  | No  | Yes | A | G | G | G | het  | homo | het  |
| No  | chr3  | 48311233  | NM_016089         | 2118 | No  | No  | Yes | C | C | T | C | homo | het  | homo |
| Yes | chr19 | 8321946   | NM_024552         | 1046 | Yes | Yes | No  | T | C | T | C | homo | homo | het  |
| No  | chr1  | 154245142 | NM_001018837      | 104  | Yes | No  | No  | T | G | T | G | homo | homo | het  |
| No  | chr5  | 176867943 | NM_002082         | 1726 | No  | Yes | No  | A | G | G | A | het  | het  | homo |
| No  | chr22 | 37531436  | NM_000878         | 881  | No  | Yes | No  | C | T | T | C | het  | het  | homo |
| No  | chr13 | 37583831  | NM_017569         | 2544 | No  | No  | Yes | C | T | C | T | het  | homo | het  |
| No  | chr1  | 154561925 | NM_001193495      | 2962 | Yes | No  | No  | G | A | G | G | het  | homo | homo |
| No  | chr2  | 174232622 | NM_145810         | 1477 | Yes | No  | No  | C | T | T | T | het  | homo | homo |
| No  | chr5  | 132437531 | NM_002154         | 2399 | Yes | No  | Yes | C | T | C | T | het  | homo | het  |
| No  | chr7  | 50469981  | NM_006060         | 3371 | Yes | No  | No  | T | C | T | T | het  | homo | homo |
| No  | chr2  | 11911761  | NM_145693         | 637  | Yes | No  | No  | C | C | T | C | homo | het  | homo |
| No  | chr11 | 61213920  | NM_017841         | 900  | No  | Yes | No  | T | C | C | C | homo | het  | het  |
| No  | chr2  | 152139416 | NM_004688         | 377  | Yes | No  | Yes | C | T | T | T | het  | homo | het  |
| No  | chr7  | 24758753  | NM_001127453      | 577  | No  | No  | Yes | G | A | G | A | het  | homo | het  |
| No  | chr1  | 40539448  | NM_000310         | 1438 | No  | Yes | No  | T | G | G | T | het  | het  | homo |
| No  | chr9  | 113018755 | NM_001244938      | 166  | Yes | No  | No  | A | G | A | A | het  | homo | homo |
| No  | chr8  | 22278781  | NM_015359         | 3224 | No  | Yes | No  | G | G | A | A | homo | het  | het  |
| No  | chr19 | 1014398   | NM_033420         | 446  | Yes | Yes | No  | T | C | C | C | het  | homo | homo |
| No  | chr3  | 14528028  | NM_003043         | 3679 | No  | Yes | No  | T | C | C | T | het  | het  | homo |
| No  | chr2  | 216807726 | NM_018000         | 2801 | Yes | Yes | No  | T | C | T | T | het  | homo | homo |
| No  | chr5  | 112355668 | NM_001242377      | 7869 | Yes | No  | No  | C | G | C | C | het  | homo | homo |
| No  | chr17 | 79571637  | NM_017921         | 953  | Yes | Yes | No  | G | C | G | G | het  | homo | homo |
| No  | chr8  | 27311703  | NM_173175         | 2657 | Yes | Yes | No  | T | C | C | C | het  | homo | homo |
| No  | chr2  | 99804642  | NM_145212         | 252  | Yes | No  | Yes | T | C | C | C | homo | het  | homo |
| No  | chr15 | 74328116  | NM_033240         | 3095 | Yes | Yes | No  | A | G | A | A | het  | homo | homo |
| No  | chr14 | 35263983  | NM_013448         | 1903 | Yes | No  | No  | A | A | G | G | homo | het  | het  |
| No  | chr6  | 33032865  | NM_033554         | 1162 | No  | Yes | No  | T | T | G | G | homo | het  | het  |
| No  | chr2  | 127453664 | NM_001256584      | 1480 | Yes | No  | No  | A | C | C | C | het  | homo | het  |
| No  | chr5  | 145562143 | NM_020117         | 152  | No  | No  | Yes | C | C | T | T | homo | homo | het  |
| No  | chr10 | 11356160  | NM_006561         | 1195 | No  | Yes | No  | C | T | C | T | homo | homo | het  |
| No  | chr14 | 102815042 | NM_001177611      | 625  | No  | Yes | No  | G | A | A | A | homo | het  | het  |
| No  | chr7  | 36895342  | NM_014800         | 2349 | No  | Yes | Yes | G | G | A | A | homo | homo | het  |
| No  | chr12 | 24966845  | NM_001178094      | 5678 | No  | Yes | No  | G | A | A | A | het  | homo | homo |
| No  | chr8  | 42174380  | NR_033818         | 1325 | No  | Yes | No  | G | G | A | A | homo | het  | het  |
| No  | chr5  | 102538752 | NM_015216         | 5123 | No  | Yes | No  | T | T | C | C | homo | het  | het  |
| No  | chr6  | 31729359  | NM_172166         | 2276 | Yes | No  | Yes | A | G | A | G | het  | homo | het  |
| No  | chr8  | 22278781  | NM_001135153      | 3265 | No  | Yes | No  | G | G | A | A | homo | het  | het  |
| No  | chr19 | 50411742  | NM_012346         | 1567 | Yes | No  | No  | T | C | C | C | homo | het  | homo |
| No  | chr17 | 75495397  | NM_001113492      | 2719 | No  | Yes | No  | T | T | C | C | homo | homo | het  |
| No  | chr6  | 33032861  | NM_001242524      | 1257 | No  | Yes | No  | C | C | T | T | homo | het  | het  |
| No  | chr12 | 122079441 | NM_032790         | 997  | No  | Yes | No  | T | C | T | T | het  | homo | homo |
| Yes | chr19 | 6477256   | NM_024898         | 578  | Yes | No  | Yes | C | A | C | A | homo | homo | het  |

|     |       |           |              |      |     |     |     |   |   |   |   |      |      |      |
|-----|-------|-----------|--------------|------|-----|-----|-----|---|---|---|---|------|------|------|
| No  | chr6  | 33032861  | NM_033554    | 1166 | No  | Yes | No  | C | C | T | T | homo | het  | het  |
| No  | chr4  | 38774889  | NM_001195106 | 2772 | No  | Yes | No  | A | G | A | G | homo | homo | het  |
| No  | chr10 | 129905896 | NM_002417    | 4403 | Yes | No  | No  | A | T | A | T | het  | homo | het  |
| No  | chr2  | 219267781 | NM_001206878 | 474  | No  | No  | Yes | C | C | T | T | homo | homo | het  |
| No  | chr11 | 82973004  | NM_021825    | 1076 | No  | No  | Yes | G | A | A | A | het  | homo | het  |
| No  | chr19 | 16265241  | NM_032855    | 945  | Yes | No  | No  | C | T | C | C | het  | homo | homo |
| No  | chr11 | 75115893  | NM_001260507 | 642  | Yes | Yes | No  | C | A | C | C | het  | homo | homo |
| No  | chr10 | 106014706 | NM_001191002 | 239  | Yes | No  | No  | G | A | G | G | het  | homo | homo |
| No  | chr16 | 11647492  | NR_024320    | 408  | Yes | No  | No  | A | G | A | G | het  | homo | het  |
| No  | chr1  | 162495325 | NM_144624    | 4352 | No  | No  | Yes | G | A | G | A | het  | homo | het  |
| No  | chr8  | 142161888 | NM_014957    | 1064 | No  | No  | Yes | G | G | A | G | homo | het  | homo |
| No  | chr14 | 61788816  | NM_006255    | 302  | No  | Yes | No  | C | C | T | T | homo | het  | het  |
| No  | chr19 | 8028544   | NM_001419    | 971  | No  | No  | Yes | T | C | T | C | het  | homo | het  |
| No  | chr7  | 50470156  | NM_001220773 | 2997 | Yes | No  | No  | G | C | G | G | het  | homo | homo |
| Yes | chr20 | 25038484  | NM_001252677 | 335  | Yes | Yes | Yes | C | C | A | A | homo | homo | het  |
| No  | chr6  | 109688114 | NM_001142404 | 2023 | Yes | No  | No  | T | T | C | T | homo | het  | homo |
| No  | chr6  | 31474000  | NM_005931    | 522  | No  | No  | Yes | G | A | G | A | het  | homo | het  |
| No  | chr16 | 31195279  | NM_001170634 | 393  | No  | Yes | No  | C | C | T | T | homo | het  | het  |
| No  | chr5  | 126140522 | NM_005573    | 1300 | Yes | No  | No  | T | C | T | C | het  | homo | het  |
| No  | chr6  | 31129707  | NM_001077511 | 1246 | Yes | No  | No  | C | C | T | C | homo | het  | homo |
| No  | chr20 | 54979035  | NM_001324    | 1776 | No  | No  | Yes | G | A | G | A | het  | homo | het  |
| No  | chr9  | 123665019 | NM_005658    | 4102 | No  | No  | Yes | T | T | C | T | homo | het  | homo |
| No  | chr4  | 76730195  | NM_003715    | 2490 | No  | No  | Yes | A | A | G | A | homo | het  | homo |
| No  | chr5  | 171533782 | NM_005990    | 930  | Yes | No  | No  | A | G | A | G | het  | homo | het  |
| No  | chr9  | 88903367  | NM_001185059 | 4851 | Yes | No  | Yes | A | T | A | T | homo | homo | het  |
| No  | chr6  | 29855952  | NR_001434    | 446  | Yes | Yes | No  | A | C | A | A | het  | homo | homo |
| Yes | chr11 | 10521764  | NM_001025389 | 2024 | Yes | Yes | Yes | T | T | C | C | homo | homo | het  |
| No  | chr7  | 135614740 | NM_145808    | 647  | Yes | No  | No  | A | A | G | G | homo | het  | het  |
| No  | chr7  | 150761680 | NM_003040    | 541  | Yes | No  | No  | C | A | C | A | het  | homo | het  |
| No  | chr9  | 2191309   | NM_003070    | 4737 | Yes | No  | No  | C | C | G | C | homo | het  | homo |
| No  | chrX  | 54836361  | NM_014599    | 351  | Yes | No  | Yes | A | A | G | G | homo | homo | het  |
| No  | chr4  | 38777173  | NM_001017388 | 171  | Yes | No  | No  | T | T | A | A | homo | het  | het  |
| No  | chr16 | 19548030  | NM_001199022 | 1286 | No  | Yes | No  | T | T | A | A | homo | het  | het  |
| No  | chr6  | 7288297   | NM_003144    | 2849 | Yes | No  | Yes | C | T | C | T | het  | homo | het  |
| Yes | chr3  | 122259606 | NM_001146106 | 1804 | Yes | No  | No  | A | G | A | G | homo | homo | het  |
| No  | chr13 | 41515118  | NM_172373    | 1568 | No  | No  | Yes | G | G | A | G | homo | het  | homo |
| No  | chr10 | 72179746  | NM_004096    | 519  | No  | No  | Yes | C | T | T | T | het  | homo | het  |
| Yes | chr15 | 42191909  | NM_139265    | 2623 | Yes | No  | No  | G | C | G | C | homo | homo | het  |
| No  | chr14 | 23240328  | NM_005015    | 1221 | No  | Yes | Yes | T | T | A | A | homo | homo | het  |
| No  | chr12 | 4462161   | NM_020375    | 1196 | No  | Yes | No  | C | C | T | T | homo | het  | het  |
| No  | chr1  | 243419429 | NM_006642    | 123  | No  | Yes | No  | T | A | T | A | homo | homo | het  |
| Yes | chr5  | 145508340 | NM_020117    | 3013 | Yes | No  | Yes | T | T | C | C | homo | homo | het  |
| No  | chr1  | 198677386 | NM_002838    | 1242 | Yes | No  | No  | G | G | A | G | homo | het  | homo |
| No  | chr6  | 33037626  | NM_001242524 | 336  | No  | Yes | No  | G | G | C | C | homo | het  | het  |
| No  | chr1  | 211920314 | NM_014873    | 4267 | Yes | No  | Yes | A | G | A | G | het  | homo | het  |
| No  | chr2  | 42578149  | NM_004718    | 610  | Yes | No  | No  | T | T | C | C | homo | het  | het  |
| No  | chr15 | 70352968  | NM_001105192 | 1734 | No  | Yes | Yes | G | G | C | C | homo | homo | het  |
| No  | chr12 | 93862989  | NR_038161    | 87   | Yes | No  | No  | G | A | G | A | het  | homo | het  |
| No  | chr19 | 10449392  | NM_002162    | 364  | Yes | No  | No  | T | C | C | C | het  | homo | het  |
| No  | chr14 | 102814945 | NM_032630    | 653  | No  | Yes | No  | C | C | T | T | homo | het  | het  |
| No  | chr5  | 150410219 | NM_001252390 | 2072 | Yes | No  | No  | G | T | G | T | het  | homo | het  |
| Yes | chr11 | 10521764  | NM_001025390 | 2163 | Yes | Yes | Yes | T | T | C | C | homo | homo | het  |
| No  | chr3  | 142222284 | NM_001184    | 5330 | Yes | No  | Yes | T | T | C | T | homo | het  | homo |
| No  | chr20 | 62522466  | NM_001243895 | 1878 | No  | Yes | No  | A | G | G | G | homo | het  | het  |
| No  | chr6  | 41568064  | NM_001012426 | 3891 | Yes | Yes | No  | G | A | G | G | het  | homo | homo |
| No  | chr1  | 21573722  | NM_001113349 | 1221 | No  | Yes | No  | C | T | C | C | het  | homo | homo |
| No  | chr11 | 32125961  | NM_002901    | 1205 | No  | No  | Yes | C | C | T | T | homo | homo | het  |
| No  | chr14 | 75370123  | NR_045209    | 2466 | No  | No  | Yes | C | C | T | C | homo | het  | homo |
| No  | chr11 | 9773517   | NM_015055    | 3857 | No  | Yes | No  | C | A | A | A | homo | het  | het  |
| No  | chr19 | 3053574   | NM_001130    | 1010 | No  | Yes | No  | A | A | G | G | homo | het  | het  |
| No  | chr19 | 49950298  | NM_017916    | 954  | No  | No  | Yes | G | A | A | A | het  | homo | het  |
| No  | chr14 | 91925027  | NM_032560    | 2822 | Yes | No  | Yes | C | A | C | A | het  | homo | het  |
| No  | chr8  | 38706369  | NM_001122824 | 2395 | Yes | No  | No  | C | C | T | C | homo | het  | homo |

|     |       |           |                |       |     |     |     |   |   |   |   |      |      |      |
|-----|-------|-----------|----------------|-------|-----|-----|-----|---|---|---|---|------|------|------|
| No  | chr12 | 32854366  | NM_012063      | 281   | Yes | No  | No  | A | A | C | A | homo | het  | homo |
| No  | chr5  | 74062881  | NM_170691      | 162   | Yes | Yes | No  | G | A | G | G | het  | homo | homo |
| No  | chr17 | 75495397  | NM_006640      | 3176  | No  | Yes | No  | T | T | C | C | homo | homo | het  |
| No  | chr7  | 150139639 | TCONS_00014233 | 81    | Yes | No  | No  | G | A | G | G | het  | homo | homo |
| No  | chr8  | 98740419  | NM_178812      | 5598  | Yes | Yes | No  | A | G | A | A | het  | homo | homo |
| No  | chr12 | 14927825  | NM_177925      | 556   | No  | No  | Yes | C | G | C | G | het  | homo | het  |
| Yes | chr7  | 43647879  | NM_004760      | 595   | Yes | No  | Yes | C | C | T | T | homo | homo | het  |
| No  | chr20 | 45315769  | NM_033550      | 608   | Yes | Yes | No  | A | A | G | G | homo | het  | het  |
| No  | chr17 | 4840868   | NM_001165418   | 1217  | Yes | No  | Yes | C | T | C | T | het  | homo | het  |
| No  | chr10 | 112658060 | NM_014456      | 1910  | No  | No  | Yes | G | A | A | A | het  | het  | homo |
| No  | chr1  | 150238699 | NR_045034      | 1121  | Yes | Yes | No  | A | A | G | G | homo | homo | het  |
| No  | chr5  | 96118852  | NM_001040458   | 2535  | Yes | No  | No  | C | C | G | G | homo | het  | het  |
| No  | chr14 | 102815042 | NM_001177612   | 426   | No  | Yes | No  | G | A | A | A | homo | het  | het  |
| No  | chr17 | 39912145  | NM_021991      | 2222  | No  | Yes | No  | A | T | A | A | het  | homo | homo |
| No  | chr7  | 129297332 | NM_005011      | 258   | Yes | No  | No  | T | T | G | G | homo | het  | het  |
| No  | chr6  | 31604044  | NM_004638      | 5969  | No  | Yes | No  | T | G | G | G | het  | homo | homo |
| No  | chr12 | 24968749  | NM_001178091   | 3770  | No  | Yes | No  | T | C | C | C | het  | homo | homo |
| No  | chr4  | 39458051  | NM_000661      | 425   | Yes | No  | No  | T | C | C | C | homo | het  | homo |
| No  | chr2  | 3504687   | NM_018269      | 410   | No  | No  | Yes | T | C | C | C | het  | het  | homo |
| No  | chr5  | 149776355 | NM_001135243   | 4400  | Yes | No  | No  | G | G | C | C | homo | het  | het  |
| No  | chr7  | 28862379  | NM_182899      | 5056  | No  | No  | Yes | G | A | G | A | het  | homo | het  |
| No  | chr6  | 32522576  | NR_001298      | 631   | Yes | No  | Yes | T | C | T | C | het  | homo | het  |
| Yes | chr17 | 76220206  | NM_001012270   | 1003  | Yes | No  | No  | T | T | C | C | homo | homo | het  |
| No  | chr20 | 25288632  | NM_001042472   | 1116  | Yes | No  | No  | C | T | C | C | het  | homo | homo |
| No  | chr2  | 217070057 | NM_021141      | 2471  | No  | No  | Yes | G | G | A | G | homo | het  | homo |
| No  | chr11 | 64009879  | NM_001135208   | 131   | Yes | No  | No  | G | A | G | G | het  | homo | homo |
| No  | chr14 | 51206145  | NM_182946      | 5700  | No  | Yes | No  | T | T | A | A | homo | het  | het  |
| No  | chr6  | 33032865  | NM_001242525   | 1177  | No  | Yes | No  | T | T | G | G | homo | het  | het  |
| No  | chr6  | 33169895  | NM_001077516   | 744   | Yes | No  | No  | C | C | G | G | homo | het  | het  |
| No  | chr2  | 105924510 | NM_004257      | 333   | No  | Yes | No  | T | T | C | C | homo | het  | het  |
| No  | chr15 | 40686087  | NM_033286      | 1355  | Yes | No  | Yes | T | T | C | T | homo | het  | homo |
| No  | chr2  | 68623915  | NM_002664      | 2182  | Yes | No  | No  | T | T | C | C | homo | het  | het  |
| No  | chr1  | 93617546  | NM_016040      | 3818  | No  | Yes | No  | A | G | G | G | het  | homo | homo |
| No  | chr12 | 24967212  | NM_001178092   | 5235  | Yes | No  | No  | G | A | A | A | het  | homo | homo |
| No  | chr3  | 47555142  | NM_001031703   | 58    | Yes | Yes | No  | G | T | T | T | homo | het  | het  |
| No  | chr16 | 23677006  | NR_037573      | 686   | No  | No  | Yes | A | G | A | G | homo | homo | het  |
| No  | chr4  | 2251893   | NM_006454      | 1040  | Yes | No  | No  | C | C | T | T | homo | het  | het  |
| No  | chr2  | 86385728  | NM_001100170   | 1504  | Yes | No  | Yes | G | G | A | G | homo | het  | homo |
| No  | chr15 | 35273620  | NM_014106      | 2370  | Yes | Yes | No  | G | G | A | A | homo | het  | het  |
| No  | chr17 | 27441077  | NM_203318      | 2708  | Yes | No  | No  | G | C | C | C | homo | het  | homo |
| No  | chr10 | 95259979  | NM_001127182   | 353   | Yes | Yes | No  | C | G | C | C | het  | homo | homo |
| No  | chr16 | 11647492  | NM_004862      | 507   | Yes | No  | No  | A | G | A | G | het  | homo | het  |
| No  | chr17 | 26676135  | NM_015584      | 1095  | Yes | Yes | No  | G | G | A | A | homo | het  | het  |
| No  | chr10 | 3206027   | NM_001242307   | 750   | Yes | Yes | No  | T | C | C | C | het  | homo | homo |
| No  | chr7  | 139249414 | NM_022740      | 12127 | Yes | No  | No  | C | T | C | T | het  | homo | het  |
| No  | chr11 | 89956206  | NM_012124      | 327   | No  | No  | Yes | C | T | T | C | het  | het  | homo |
| No  | chr19 | 16259623  | NM_032855      | 594   | Yes | Yes | No  | C | T | C | C | het  | homo | homo |
| No  | chr1  | 211836752 | NM_002497      | 1505  | No  | No  | Yes | C | T | C | T | het  | homo | het  |
| No  | chr3  | 191114266 | NM_178335      | 6756  | Yes | No  | No  | T | T | C | T | homo | het  | homo |
| No  | chr3  | 105260518 | NM_001243281   | 1596  | No  | Yes | No  | G | A | A | A | het  | het  | homo |
| No  | chr11 | 73850002  | NM_015531      | 945   | Yes | No  | No  | C | C | G | G | homo | het  | het  |
| No  | chr4  | 40244347  | NM_004310      | 408   | Yes | No  | No  | T | T | C | T | homo | het  | homo |
| No  | chr17 | 30326827  | NM_015355      | 3247  | Yes | No  | Yes | C | T | C | T | het  | homo | het  |
| No  | chr14 | 51206145  | NM_020921      | 5700  | No  | Yes | No  | T | T | A | A | homo | het  | het  |
| Yes | chr16 | 89628073  | NM_033251      | 583   | Yes | No  | Yes | G | G | A | A | homo | homo | het  |
| No  | chr14 | 100801331 | NM_213646      | 1506  | Yes | No  | No  | G | A | G | A | het  | homo | het  |
| No  | chr22 | 38151170  | NM_007032      | 415   | No  | Yes | No  | G | G | A | A | homo | het  | het  |
| No  | chr17 | 61903445  | NM_017647      | 917   | No  | No  | Yes | C | G | G | G | het  | homo | het  |
| No  | chr8  | 142205237 | NM_014957      | 4780  | Yes | No  | No  | A | G | G | G | het  | homo | het  |
| No  | chr12 | 133587980 | NM_001256280   | 1912  | No  | Yes | No  | C | T | C | T | homo | homo | het  |
| No  | chr5  | 167933158 | NM_002887      | 1231  | Yes | Yes | No  | T | A | T | T | het  | homo | homo |
| No  | chr18 | 72167120  | NM_018235      | 171   | Yes | No  | No  | G | G | A | G | homo | het  | homo |
| No  | chr20 | 47558417  | NM_006420      | 321   | No  | No  | Yes | C | T | C | T | het  | homo | het  |

|     |       |           |              |       |     |     |     |   |   |   |   |      |      |      |
|-----|-------|-----------|--------------|-------|-----|-----|-----|---|---|---|---|------|------|------|
| No  | chr20 | 5933108   | NM_032485    | 564   | Yes | No  | No  | C | A | C | A | het  | homo | het  |
| Yes | chr5  | 150518988 | NM_001193544 | 235   | Yes | No  | No  | C | T | C | T | homo | homo | het  |
| No  | chr6  | 79911190  | NM_004242    | 693   | Yes | No  | No  | C | T | C | T | het  | homo | het  |
| No  | chr12 | 24966845  | NM_001178093 | 5381  | No  | Yes | No  | G | A | A | A | het  | homo | homo |
| No  | chr13 | 99948178  | NM_004951    | 396   | No  | No  | Yes | G | G | T | T | homo | homo | het  |
| No  | chr1  | 183099560 | NM_002293    | 3619  | No  | No  | Yes | G | A | G | A | het  | homo | het  |
| No  | chr22 | 41652733  | NM_002883    | 1135  | No  | No  | Yes | C | T | C | T | het  | homo | het  |
| No  | chr9  | 286593    | NM_203447    | 401   | No  | No  | Yes | C | A | A | C | het  | het  | homo |
| No  | chr22 | 40726762  | NM_001024843 | 10909 | Yes | No  | No  | A | G | A | G | homo | homo | het  |
| No  | chr19 | 55143491  | NM_001081638 | 689   | No  | Yes | No  | G | G | T | T | homo | het  | het  |
| No  | chr1  | 19950062  | NR_033757    | 461   | No  | No  | Yes | T | C | T | C | het  | homo | het  |
| No  | chr8  | 125562029 | NM_005005    | 521   | No  | Yes | No  | C | T | T | C | het  | het  | homo |
| No  | chr20 | 46283383  | NM_006534    | 5746  | Yes | No  | No  | A | A | G | A | homo | het  | homo |
| No  | chr9  | 2811505   | NM_014878    | 1587  | Yes | No  | No  | C | T | C | C | het  | homo | homo |
| No  | chr3  | 193334991 | NM_130836    | 707   | Yes | No  | Yes | G | A | G | A | het  | homo | het  |
| No  | chr3  | 122144952 | NR_026698    | 2808  | No  | Yes | No  | C | A | C | C | het  | homo | homo |
| No  | chr3  | 58413465  | NM_001173468 | 1365  | Yes | No  | Yes | C | G | G | G | homo | het  | homo |
| No  | chr16 | 89644001  | NM_153636    | 359   | Yes | No  | No  | T | C | T | C | het  | homo | het  |
| No  | chr8  | 27308585  | NM_004103    | 2766  | Yes | No  | Yes | A | A | C | C | homo | homo | het  |
| No  | chr6  | 32627882  | NM_002123    | 999   | No  | Yes | No  | G | G | A | A | homo | homo | het  |
| No  | chr19 | 1079959   | NM_012292    | 1785  | Yes | Yes | No  | G | G | A | A | homo | het  | het  |
| No  | chr19 | 35739702  | NM_001260490 | 144   | No  | No  | Yes | G | G | A | G | homo | het  | homo |
| No  | chrX  | 2656258   | NM_002414    | 667   | No  | Yes | No  | G | G | A | A | homo | het  | het  |
| No  | chr1  | 1684472   | NM_001198993 | 1365  | No  | Yes | Yes | G | A | A | G | het  | het  | homo |
| No  | chr22 | 36545137  | NR_027834    | 428   | Yes | No  | Yes | T | A | A | A | het  | homo | het  |
| No  | chr1  | 1684472   | NM_001198994 | 1852  | No  | Yes | Yes | G | A | A | G | het  | het  | homo |
| No  | chr2  | 99804642  | NR_028356    | 252   | Yes | No  | Yes | T | C | C | C | homo | het  | homo |
| No  | chr22 | 36556823  | NM_145641    | 1664  | No  | No  | Yes | C | A | A | A | het  | homo | het  |
| No  | chr17 | 41244000  | NM_007294    | 3780  | Yes | No  | No  | A | A | G | G | homo | het  | het  |
| No  | chr1  | 150238699 | NM_001243771 | 1195  | Yes | Yes | No  | A | A | G | G | homo | homo | het  |
| Yes | chr8  | 27255263  | NM_004103    | 415   | Yes | No  | No  | A | A | G | G | homo | homo | het  |
| No  | chr8  | 27255146  | NM_173176    | 285   | No  | Yes | Yes | G | G | A | A | homo | homo | het  |
| No  | chr16 | 10989219  | NM_000246    | 266   | Yes | No  | No  | C | C | G | C | homo | het  | homo |
| No  | chr2  | 242292307 | NM_006155    | 2361  | No  | No  | Yes | T | C | T | C | het  | homo | het  |
| No  | chr2  | 118575215 | NM_006773    | 380   | Yes | Yes | No  | C | C | G | G | homo | het  | het  |
| No  | chr4  | 882643    | NM_005255    | 1396  | Yes | No  | No  | C | C | T | C | homo | het  | homo |
| No  | chr12 | 123893322 | NM_020382    | 2173  | No  | No  | Yes | C | T | C | T | het  | homo | het  |
| No  | chr5  | 179260213 | NM_001142299 | 961   | Yes | No  | No  | G | G | A | A | homo | het  | het  |
| No  | chr12 | 55343628  | NM_001098815 | 2224  | Yes | No  | No  | T | C | C | C | het  | homo | homo |
| No  | chr14 | 102815042 | NM_032630    | 556   | No  | Yes | No  | G | A | A | A | homo | het  | het  |
| Yes | chr7  | 99696797  | NM_182776    | 1020  | Yes | No  | Yes | A | A | G | G | homo | homo | het  |
| No  | chr8  | 27301725  | NM_173175    | 2306  | No  | No  | Yes | C | C | G | C | homo | het  | homo |
| No  | chr19 | 55143491  | NM_001081637 | 629   | No  | Yes | No  | G | G | T | T | homo | het  | het  |
| No  | chr17 | 41244000  | NR_027676    | 3684  | Yes | No  | No  | A | A | G | G | homo | het  | het  |
| No  | chr15 | 74328116  | NM_033239    | 2454  | Yes | Yes | No  | A | G | A | A | het  | homo | homo |
| No  | chr12 | 32854366  | NM_005690    | 281   | Yes | No  | No  | A | A | C | A | homo | het  | homo |
| No  | chr13 | 50080827  | NM_001040443 | 488   | Yes | Yes | No  | G | G | T | T | homo | het  | het  |
| No  | chr20 | 49196284  | NM_002827    | 1083  | No  | Yes | No  | C | C | T | T | homo | het  | het  |
| No  | chr6  | 408079    | NM_002460    | 1963  | No  | No  | Yes | C | C | T | C | homo | het  | homo |
| No  | chr13 | 37583831  | NM_001014286 | 2566  | No  | No  | Yes | C | T | C | T | het  | homo | het  |
| No  | chr11 | 63991581  | NM_001160389 | 881   | Yes | No  | No  | C | T | C | C | het  | homo | homo |
| No  | chr8  | 42174380  | NM_001556    | 1269  | No  | Yes | No  | G | G | A | A | homo | het  | het  |
| No  | chr4  | 57881715  | NM_000938    | 1891  | No  | No  | Yes | G | G | A | G | homo | het  | homo |
| No  | chr17 | 7215536   | NM_001970    | 1109  | Yes | Yes | No  | T | C | T | C | homo | homo | het  |
| No  | chr2  | 71631109  | NM_014497    | 3262  | Yes | No  | Yes | A | A | G | A | homo | het  | homo |
| No  | chr7  | 28862379  | NM_182898    | 5400  | No  | No  | Yes | G | A | G | A | het  | homo | het  |
| No  | chr12 | 54357495  | NR_047518    | 934   | No  | No  | Yes | G | C | G | C | het  | homo | het  |
| No  | chr3  | 32523777  | NM_017801    | 2393  | Yes | No  | No  | A | G | G | G | het  | homo | het  |
| No  | chr15 | 65108504  | NM_025049    | 1985  | No  | Yes | Yes | T | T | A | A | homo | homo | het  |
| No  | chr6  | 32412435  | NM_019111    | 892   | Yes | Yes | No  | G | G | A | A | homo | homo | het  |
| No  | chr19 | 19105259  | NM_001017392 | 3311  | Yes | No  | No  | C | C | T | T | homo | het  | het  |
| No  | chr19 | 53115842  | NM_001105553 | 2656  | No  | No  | Yes | G | A | G | A | het  | homo | het  |
| No  | chr1  | 154561925 | NM_001025107 | 2793  | Yes | No  | No  | G | A | G | G | het  | homo | homo |



|     |       |           |              |       |     |     |     |   |   |   |   |      |      |      |
|-----|-------|-----------|--------------|-------|-----|-----|-----|---|---|---|---|------|------|------|
| No  | chr10 | 71873919  | NM_001198696 | 1354  | No  | No  | Yes | G | A | G | A | het  | homo | het  |
| No  | chr3  | 39438442  | NM_017875    | 1747  | No  | No  | Yes | G | A | G | A | het  | homo | het  |
| No  | chr6  | 32627763  | NM_002123    | 1118  | No  | No  | Yes | T | T | A | A | homo | homo | het  |
| No  | chr2  | 176043097 | NM_001002258 | 618   | Yes | No  | Yes | T | T | C | T | homo | het  | homo |
| No  | chr19 | 10265593  | NM_001130823 | 1812  | Yes | No  | No  | C | C | A | C | homo | het  | homo |
| No  | chr6  | 7882205   | NR_037616    | 2630  | No  | No  | Yes | C | T | C | T | het  | homo | het  |
| No  | chr5  | 96110622  | NM_001198541 | 4409  | Yes | No  | No  | G | A | A | A | homo | het  | het  |
| No  | chr17 | 27441077  | NM_078471    | 2708  | Yes | No  | No  | G | C | C | C | homo | het  | homo |
| No  | chr22 | 36677982  | NM_002473    | 6846  | Yes | No  | No  | C | C | T | C | homo | het  | homo |
| No  | chr19 | 17936259  | NM_000215    | 4768  | Yes | No  | Yes | C | T | C | T | het  | homo | het  |
| No  | chr2  | 242168976 | NM_005336    | 4080  | No  | No  | Yes | A | G | G | G | het  | homo | het  |
| No  | chr14 | 102814945 | NM_001177611 | 722   | No  | Yes | No  | C | C | T | T | homo | het  | het  |
| No  | chr9  | 130938661 | NM_001257975 | 2167  | Yes | No  | No  | G | G | A | A | homo | het  | het  |
| No  | chr20 | 46283383  | NM_001174087 | 5755  | Yes | No  | No  | A | A | G | A | homo | het  | homo |
| No  | chr21 | 46271452  | NM_004339    | 874   | Yes | No  | No  | G | A | G | A | het  | homo | het  |
| No  | chr17 | 40722029  | NM_198204    | 571   | Yes | Yes | No  | A | G | A | G | homo | homo | het  |
| No  | chr5  | 169435713 | NM_004946    | 3275  | No  | Yes | No  | A | C | C | A | het  | het  | homo |
| No  | chr1  | 19413261  | NM_020765    | 14603 | Yes | No  | Yes | A | T | T | T | homo | het  | homo |
| No  | chr5  | 96118852  | NM_001198541 | 2293  | Yes | No  | No  | C | C | G | G | homo | het  | het  |
| No  | chr15 | 86288655  | NM_006738    | 9371  | Yes | No  | No  | A | C | A | C | het  | homo | het  |
| No  | chr22 | 30977353  | NM_014303    | 897   | No  | No  | Yes | A | T | A | T | het  | homo | het  |
| No  | chr12 | 6707526   | NM_001273    | 1712  | Yes | No  | No  | C | T | C | C | het  | homo | homo |
| No  | chr17 | 61896455  | NM_007372    | 3771  | Yes | No  | Yes | A | G | G | G | het  | homo | het  |
| No  | chr20 | 62522466  | NR_045090    | 1896  | No  | Yes | No  | A | G | G | G | homo | het  | het  |
| No  | chr11 | 85692181  | NM_007166    | 2087  | Yes | No  | No  | T | G | G | G | homo | het  | het  |
| No  | chr12 | 133587980 | NM_019591    | 2008  | No  | Yes | No  | C | T | C | T | homo | homo | het  |
| Yes | chr19 | 10370542  | NM_015956    | 1279  | Yes | Yes | No  | C | T | C | T | homo | homo | het  |
| No  | chr19 | 5041178   | NM_015015    | 574   | Yes | No  | Yes | T | C | C | C | het  | homo | het  |
| No  | chr8  | 117783975 | NM_032334    | 745   | Yes | No  | No  | C | C | T | T | homo | het  | het  |
| No  | chr11 | 65161129  | NM_031904    | 531   | Yes | Yes | No  | C | C | T | T | homo | het  | het  |
| No  | chr12 | 123645803 | NM_022782    | 2912  | No  | Yes | No  | C | T | T | T | homo | het  | het  |
| No  | chr17 | 80041466  | NM_004104    | 5385  | No  | Yes | No  | C | C | T | T | homo | het  | het  |
| No  | chr6  | 31729359  | NM_002441    | 2434  | Yes | No  | Yes | A | G | A | G | het  | homo | het  |
| No  | chr11 | 6737974   | NR_003945    | 5137  | No  | Yes | No  | T | C | T | T | het  | homo | homo |
| No  | chr16 | 87795580  | NM_001184856 | 268   | No  | Yes | No  | C | C | G | G | homo | het  | het  |
| No  | chr19 | 39923952  | NM_001020    | 485   | Yes | No  | Yes | C | C | T | C | homo | het  | homo |
| No  | chr19 | 10370490  | NM_146388    | 2158  | No  | No  | Yes | T | A | T | A | het  | homo | het  |
| No  | chr2  | 213870875 | NM_001079526 | 3028  | No  | Yes | Yes | A | A | G | G | homo | homo | het  |
| No  | chrX  | 54836361  | NM_177433    | 346   | Yes | No  | Yes | A | A | G | G | homo | homo | het  |
| No  | chr15 | 86278309  | NM_007200    | 7539  | Yes | No  | Yes | G | G | A | G | homo | het  | homo |
| Yes | chr15 | 64419374  | NM_001242933 | 784   | Yes | No  | Yes | G | G | T | T | homo | homo | het  |
| No  | chr10 | 71142420  | NM_033496    | 1541  | No  | Yes | No  | G | A | A | G | het  | het  | homo |
| No  | chr6  | 31729359  | NM_172165    | 2279  | Yes | No  | Yes | A | G | A | G | het  | homo | het  |
| No  | chr22 | 36700175  | NM_002473    | 2487  | No  | No  | Yes | T | C | T | C | het  | homo | het  |
| No  | chr10 | 81925866  | NM_145869    | 1315  | Yes | No  | No  | A | G | A | G | het  | homo | het  |
| No  | chr6  | 116720487 | NM_013352    | 302   | Yes | No  | Yes | C | T | T | T | het  | homo | het  |
| No  | chr15 | 80263406  | NM_004049    | 238   | Yes | No  | No  | G | A | G | A | het  | homo | het  |
| No  | chr2  | 68613710  | NM_002664    | 711   | No  | Yes | No  | G | G | A | A | homo | het  | het  |
| No  | chr2  | 68607947  | NM_002664    | 453   | Yes | Yes | No  | G | T | T | T | homo | het  | het  |
| No  | chr2  | 27459364  | NM_004341    | 4449  | Yes | No  | No  | T | C | T | C | het  | homo | het  |
| No  | chr3  | 42826041  | NM_014056    | 1126  | Yes | Yes | No  | A | C | A | A | het  | homo | homo |
| No  | chr4  | 38777173  | NM_001195106 | 488   | Yes | No  | No  | T | T | A | A | homo | het  | het  |
| No  | chr1  | 21573722  | NM_001113347 | 1375  | No  | Yes | No  | C | T | C | C | het  | homo | homo |
| No  | chr2  | 73491514  | NM_001080410 | 1698  | No  | Yes | No  | G | A | A | A | het  | het  | homo |
| No  | chr12 | 121878659 | NM_032590    | 3674  | No  | Yes | No  | G | A | G | G | het  | homo | homo |
| No  | chr8  | 29207845  | NM_001394    | 423   | No  | Yes | No  | G | A | G | G | het  | homo | homo |
| No  | chr11 | 18424451  | NM_001165414 | 852   | Yes | No  | Yes | C | T | C | T | homo | homo | het  |
| No  | chr1  | 24077451  | NM_003198    | 494   | No  | Yes | No  | C | T | C | T | homo | homo | het  |
| No  | chr7  | 32526687  | NM_001139499 | 684   | Yes | Yes | No  | G | G | A | A | homo | het  | het  |
| No  | chr10 | 3189380   | NM_001242309 | 2066  | Yes | No  | Yes | G | G | A | A | homo | homo | het  |
| No  | chr17 | 17046024  | NM_015134    | 1069  | Yes | No  | Yes | C | A | A | A | het  | homo | het  |
| No  | chr14 | 53503668  | NM_001160147 | 12688 | No  | No  | Yes | G | A | G | A | het  | homo | het  |
| No  | chr6  | 170862300 | NM_002793    | 118   | Yes | No  | No  | C | G | G | G | het  | homo | homo |

|     |       |           |                   |      |     |     |     |   |   |   |   |      |      |      |
|-----|-------|-----------|-------------------|------|-----|-----|-----|---|---|---|---|------|------|------|
| No  | chr6  | 7882205   | NM_001145549      | 2473 | No  | No  | Yes | C | T | C | T | het  | homo | het  |
| No  | chr20 | 25288632  | NM_015600         | 1116 | Yes | No  | No  | C | T | C | C | het  | homo | homo |
| No  | chr2  | 38298139  | NM_000104         | 1760 | Yes | Yes | No  | A | G | A | A | het  | homo | homo |
| No  | chr9  | 123614604 | NR_024408         | 1751 | No  | Yes | No  | C | C | A | A | homo | homo | het  |
| No  | chr2  | 174232622 | NM_031942         | 1714 | Yes | No  | No  | C | T | T | T | het  | homo | homo |
| No  | chr10 | 97631492  | NM_001098175      | 7084 | No  | Yes | No  | T | A | T | A | homo | homo | het  |
| No  | chr16 | 75481185  | NM_145254         | 792  | No  | No  | Yes | C | C | G | G | homo | homo | het  |
| No  | chr6  | 30458064  | NM_005516         | 508  | No  | No  | Yes | G | A | A | A | het  | het  | homo |
| No  | chr12 | 14927825  | NR_027716         | 556  | No  | No  | Yes | C | G | C | G | het  | homo | het  |
| No  | chr12 | 93862989  | NR_038160         | 87   | Yes | No  | No  | G | A | G | A | het  | homo | het  |
| No  | chr17 | 30228656  | NM_018428         | 74   | No  | No  | Yes | C | T | C | T | het  | homo | het  |
| No  | chr5  | 127469859 | NM_001046         | 1355 | No  | Yes | No  | A | G | A | A | het  | homo | homo |
| No  | chr8  | 53555069  | NM_014781         | 4737 | No  | Yes | No  | T | C | C | C | het  | het  | homo |
| No  | chr1  | 145441620 | NM_006472         | 1919 | Yes | No  | No  | T | C | C | C | homo | het  | homo |
| No  | chr5  | 96118852  | NM_016442         | 2535 | Yes | No  | No  | C | C | G | G | homo | het  | het  |
| Yes | chr21 | 46330674  | NM_000211         | 257  | Yes | Yes | No  | G | T | G | T | homo | homo | het  |
| No  | chr5  | 43290700  | NM_001098272      | 2322 | Yes | No  | No  | A | T | T | T | homo | het  | homo |
| No  | chr3  | 32533246  | NM_017801         | 437  | Yes | No  | No  | A | A | G | G | homo | het  | het  |
| No  | chr5  | 140027216 | NR_033697         | 155  | No  | No  | Yes | A | G | G | A | het  | het  | homo |
| No  | chr11 | 18424487  | NM_005566         | 791  | No  | Yes | No  | A | G | A | G | homo | homo | het  |
| No  | chr11 | 65271832  | NR_002819         | 6600 | No  | Yes | No  | C | T | T | C | het  | het  | homo |
| No  | chr7  | 29960812  | NM_001145515      | 4015 | No  | Yes | No  | A | A | T | T | homo | het  | het  |
| No  | chr7  | 50470156  | NM_001220766      | 3285 | Yes | No  | No  | G | C | G | G | het  | homo | homo |
| No  | chr1  | 156206121 | NM_001199664      | 232  | No  | Yes | No  | G | G | A | A | homo | het  | het  |
| No  | chr22 | 32881190  | NM_001257990      | 821  | No  | Yes | No  | G | A | G | G | het  | homo | homo |
| No  | chr10 | 99126249  | NM_015179         | 3484 | Yes | No  | No  | C | T | C | C | het  | homo | homo |
| No  | chr2  | 109301687 | NM_001193485      | 2659 | Yes | Yes | No  | G | C | C | C | homo | het  | het  |
| No  | chr19 | 35837813  | NM_001185100      | 2722 | Yes | No  | No  | C | C | T | C | homo | het  | homo |
| No  | chr2  | 242082480 | NM_001252120      | 254  | No  | Yes | No  | T | G | T | G | homo | homo | het  |
| No  | chr2  | 71631109  | NM_001252612      | 3578 | Yes | No  | Yes | A | A | G | A | homo | het  | homo |
| No  | chr10 | 81925866  | NM_145868         | 1119 | Yes | No  | No  | A | G | A | G | het  | homo | het  |
| No  | chr12 | 125284748 | NM_005505         | 1303 | Yes | No  | No  | T | C | T | T | het  | homo | homo |
| No  | chr3  | 10302172  | NM_014760         | 1347 | Yes | No  | No  | G | A | G | A | homo | homo | het  |
| No  | chr6  | 33054400  | NM_002121         | 982  | No  | Yes | No  | T | T | C | C | homo | homo | het  |
| No  | chr15 | 86278309  | NM_144767         | 2330 | Yes | No  | Yes | G | G | A | G | homo | het  | homo |
| No  | chr22 | 30977353  | NR_036550         | 1295 | No  | No  | Yes | A | T | A | T | het  | homo | het  |
| No  | chr6  | 7288544   | NM_003144         | 2602 | Yes | No  | No  | T | G | T | G | het  | homo | het  |
| No  | chr6  | 26415062  | NM_001145009      | 3809 | Yes | Yes | No  | C | C | A | A | homo | het  | het  |
| No  | chr2  | 176043097 | NM_001190329      | 1182 | Yes | No  | Yes | T | T | C | T | homo | het  | homo |
| No  | chr16 | 15131974  | NM_173474         | 852  | Yes | Yes | No  | C | C | A | A | homo | het  | het  |
| No  | chr19 | 39926521  | NM_001020         | 98   | Yes | No  | No  | C | T | C | T | het  | homo | het  |
| No  | chr9  | 131910644 | NM_178000         | 2160 | No  | No  | Yes | G | A | A | A | homo | het  | homo |
| No  | chr14 | 35062312  | NM_021249         | 806  | Yes | No  | No  | G | A | G | A | homo | homo | het  |
| No  | chr8  | 103851052 | NM_148174         | 965  | Yes | No  | Yes | A | G | A | G | het  | homo | het  |
| No  | chr6  | 31540784  | NM_000595         | 341  | No  | No  | Yes | C | A | C | A | het  | homo | het  |
| No  | chr8  | 66515865  | NM_018120         | 1868 | Yes | No  | No  | T | C | T | T | het  | homo | homo |
| No  | chr6  | 32906716  | ENST00000429234.1 | 264  | No  | No  | Yes | A | G | A | G | het  | homo | het  |
| No  | chr19 | 41928652  | NM_001164783      | 1008 | Yes | Yes | No  | C | T | T | T | het  | homo | homo |
| No  | chr8  | 22278781  | NM_001128431      | 3224 | No  | Yes | No  | G | G | A | A | homo | het  | het  |
| No  | chr4  | 68497597  | NM_018227         | 2224 | Yes | No  | No  | G | T | G | G | het  | homo | homo |
| No  | chr20 | 62522466  | NM_199359         | 1867 | No  | Yes | No  | A | G | G | G | homo | het  | het  |
| No  | chr2  | 242082480 | NM_015148         | 101  | No  | Yes | No  | T | G | T | G | homo | homo | het  |
| No  | chr1  | 160723517 | NM_021181         | 1573 | No  | No  | Yes | A | G | G | G | het  | het  | homo |
| No  | chr11 | 64972286  | NM_005186         | 1480 | No  | Yes | No  | G | G | C | C | homo | het  | het  |
| No  | chr12 | 14956331  | NM_016312         | 71   | No  | No  | Yes | G | A | G | A | het  | homo | het  |
| No  | chr12 | 55343628  | NM_001136030      | 2321 | Yes | No  | No  | T | C | C | C | het  | homo | homo |
| No  | chr17 | 647988    | NM_015721         | 3414 | No  | Yes | No  | G | A | A | A | homo | het  | het  |
| No  | chr20 | 47241805  | NM_020820         | 5621 | Yes | No  | No  | C | C | T | C | homo | het  | homo |
| No  | chr11 | 18424451  | NM_001165415      | 755  | Yes | No  | Yes | C | T | C | T | homo | homo | het  |
| No  | chr2  | 160673519 | NM_001198759      | 4252 | No  | No  | Yes | C | C | T | C | homo | het  | homo |
| No  | chr17 | 39912145  | NM_002230         | 2222 | No  | Yes | No  | A | T | A | A | het  | homo | homo |
| No  | chr12 | 125441359 | NM_032656         | 2430 | Yes | No  | No  | A | G | G | G | homo | het  | homo |
| No  | chr5  | 74062881  | NM_032380         | 162  | Yes | Yes | No  | G | A | G | G | het  | homo | homo |

|     |       |           |                   |       |     |     |     |   |   |   |   |      |      |      |
|-----|-------|-----------|-------------------|-------|-----|-----|-----|---|---|---|---|------|------|------|
| No  | chr4  | 76704004  | NM_003715         | 872   | No  | Yes | No  | T | T | C | C | homo | het  | het  |
| No  | chr12 | 24966845  | NM_005504         | 5785  | No  | Yes | No  | G | A | A | A | het  | homo | homo |
| No  | chr17 | 41244000  | NM_007300         | 3780  | Yes | No  | No  | A | A | G | G | homo | het  | het  |
| No  | chr19 | 47112740  | NM_005184         | 960   | No  | No  | Yes | C | T | T | T | homo | het  | homo |
| No  | chr4  | 10076860  | NM_005112         | 1826  | Yes | No  | Yes | C | T | C | T | het  | homo | het  |
| No  | chr5  | 149776355 | NM_001135244      | 4289  | Yes | No  | No  | G | G | C | C | homo | het  | het  |
| No  | chr14 | 64882380  | NM_005956         | 788   | Yes | No  | No  | A | G | G | G | homo | het  | het  |
| No  | chr19 | 3977486   | NM_001961         | 2273  | Yes | No  | Yes | T | T | C | T | homo | het  | homo |
| No  | chr3  | 183901281 | NM_004068         | 1342  | No  | Yes | No  | G | G | A | A | homo | het  | het  |
| No  | chr6  | 32632832  | NM_002123         | 204   | Yes | No  | No  | T | A | A | A | het  | homo | homo |
| No  | chr20 | 62522466  | NM_001243891      | 1852  | No  | Yes | No  | A | G | G | G | homo | het  | het  |
| Yes | chr15 | 64419374  | NM_148955         | 589   | Yes | No  | Yes | G | G | T | T | homo | homo | het  |
| No  | chr1  | 150594701 | NM_207042         | 1185  | No  | Yes | No  | G | A | G | G | het  | homo | homo |
| Yes | chr4  | 3213832   | NM_002111         | 6736  | Yes | Yes | No  | G | A | G | A | homo | homo | het  |
| No  | chr19 | 11123738  | NM_001128849      | 2462  | Yes | No  | No  | C | T | C | C | het  | homo | homo |
| No  | chr1  | 214826196 | NM_016343         | 8360  | Yes | No  | No  | G | G | A | A | homo | het  | het  |
| No  | chr9  | 93641151  | NM_001174167      | 1695  | Yes | Yes | No  | T | C | T | T | het  | homo | homo |
| No  | chr10 | 97631492  | NM_001164178      | 6984  | No  | Yes | No  | T | A | T | A | homo | homo | het  |
| No  | chr20 | 62522466  | NM_001243892      | 1798  | No  | Yes | No  | A | G | G | G | homo | het  | het  |
| No  | chr8  | 27308585  | NM_173174         | 3321  | Yes | No  | Yes | A | A | C | C | homo | homo | het  |
| No  | chr13 | 113508839 | NM_032189         | 2326  | Yes | Yes | No  | G | G | C | C | homo | het  | het  |
| No  | chr16 | 27413850  | NM_181078         | 368   | Yes | No  | No  | C | T | C | T | het  | homo | het  |
| No  | chr9  | 93641151  | NM_003177         | 1702  | Yes | Yes | No  | T | C | T | T | het  | homo | homo |
| No  | chr4  | 122617745 | NM_001154         | 165   | No  | Yes | No  | C | T | C | C | het  | homo | homo |
| No  | chrX  | 102930960 | NM_001142422      | 1482  | No  | No  | Yes | T | C | C | C | homo | het  | homo |
| No  | chrX  | 2656261   | NM_002414         | 670   | No  | Yes | No  | A | G | A | A | het  | homo | homo |
| No  | chr5  | 1463589   | NM_024830         | 1899  | Yes | No  | No  | A | A | G | G | homo | het  | het  |
| No  | chr4  | 89443162  | NM_001042616      | 326   | No  | No  | Yes | C | T | C | T | het  | homo | het  |
| No  | chr2  | 30481916  | NM_030915         | 1955  | Yes | No  | No  | C | T | C | T | het  | homo | het  |
| No  | chr8  | 27308585  | NM_173175         | 2542  | Yes | No  | Yes | A | A | C | C | homo | homo | het  |
| No  | chr17 | 75495397  | NM_001113491      | 2544  | No  | Yes | No  | T | T | C | C | homo | homo | het  |
| No  | chr16 | 87795580  | NM_017566         | 268   | No  | Yes | No  | C | C | G | G | homo | het  | het  |
| No  | chr11 | 614243    | NM_004031         | 1059  | No  | No  | Yes | G | G | A | G | homo | het  | homo |
| No  | chr6  | 131190838 | NM_001431         | 2654  | No  | Yes | No  | C | C | T | T | homo | het  | het  |
| No  | chr14 | 55457988  | NM_007086         | 1374  | Yes | Yes | No  | C | C | G | G | homo | het  | het  |
| No  | chr2  | 7865946   | ENST00000417930.1 | 15    | No  | Yes | Yes | C | G | C | G | homo | homo | het  |
| No  | chr1  | 39908506  | NM_012090         | 13282 | Yes | Yes | No  | G | A | G | G | het  | homo | homo |
| No  | chr14 | 75590822  | NM_033116         | 478   | Yes | No  | Yes | C | T | T | T | homo | het  | homo |
| No  | chr2  | 242168976 | NM_001243900      | 3944  | No  | No  | Yes | A | G | G | G | het  | homo | het  |
| No  | chr12 | 125302104 | NM_001082959      | 529   | Yes | Yes | No  | C | C | T | T | homo | het  | het  |
| No  | chr1  | 32639057  | NM_012316         | 4261  | Yes | No  | No  | G | C | G | G | het  | homo | homo |
| No  | chr10 | 3189380   | NM_014889         | 2367  | Yes | No  | Yes | G | G | A | A | homo | homo | het  |
| No  | chr16 | 24582299  | NM_018703         | 4850  | No  | Yes | No  | C | G | C | C | het  | homo | homo |
| No  | chr13 | 41515118  | NM_001145353      | 1351  | No  | No  | Yes | G | G | A | G | homo | het  | homo |
| Yes | chr17 | 76220206  | NM_001168         | 1121  | Yes | No  | No  | T | T | C | C | homo | homo | het  |
| No  | chr4  | 26417136  | NM_015874         | 417   | No  | No  | Yes | T | C | C | C | homo | het  | homo |
| No  | chr6  | 31729359  | NR_037846         | 2327  | Yes | No  | Yes | A | G | A | G | het  | homo | het  |
| No  | chr19 | 54627164  | NM_015629         | 960   | No  | Yes | No  | G | G | A | A | homo | het  | het  |
| No  | chr7  | 150139639 | ENST00000477392.1 | 179   | Yes | Yes | No  | G | A | G | G | het  | homo | homo |
| No  | chr9  | 95005537  | NM_002161         | 3114  | Yes | No  | No  | T | T | G | T | homo | het  | homo |
| Yes | chr14 | 69259662  | NM_004926         | 970   | Yes | Yes | No  | G | G | T | T | homo | homo | het  |
| No  | chr17 | 61896455  | NM_203499         | 3700  | Yes | No  | Yes | A | G | G | G | het  | homo | het  |
| No  | chr1  | 111415841 | NM_001040033      | 125   | No  | Yes | No  | G | G | A | A | homo | het  | het  |
| No  | chr2  | 198362018 | NM_199440         | 390   | Yes | No  | No  | A | G | G | G | het  | homo | het  |
| No  | chr4  | 26417136  | NM_203284         | 600   | No  | No  | Yes | T | C | C | C | homo | het  | homo |
| No  | chr6  | 31130593  | NM_007109         | 1907  | No  | No  | Yes | G | A | G | A | het  | homo | het  |
| No  | chrX  | 80373961  | NM_030763         | 428   | No  | Yes | No  | G | A | G | A | homo | homo | het  |
| Yes | chr16 | 58579274  | NM_206999         | 4461  | Yes | No  | No  | G | A | G | A | homo | homo | het  |
| No  | chr17 | 35346641  | NM_012138         | 1496  | No  | No  | Yes | T | C | C | C | homo | het  | homo |
| No  | chr1  | 36752152  | NM_005119         | 545   | No  | No  | Yes | C | T | T | C | het  | het  | homo |
| No  | chr8  | 27301725  | NM_173176         | 2391  | No  | No  | Yes | C | C | G | C | homo | het  | homo |
| No  | chr1  | 65335095  | NM_002227         | 795   | Yes | Yes | No  | A | A | G | G | homo | het  | het  |
| No  | chr11 | 82535963  | NM_199418         | 1652  | No  | Yes | No  | G | G | A | A | homo | het  | het  |

|     |       |           |                |       |     |     |     |   |   |   |   |      |      |      |
|-----|-------|-----------|----------------|-------|-----|-----|-----|---|---|---|---|------|------|------|
| No  | chr22 | 19025330  | NR_033674      | 2834  | No  | Yes | No  | T | T | G | G | homo | het  | het  |
| No  | chr13 | 47354101  | NM_001984      | 752   | No  | Yes | No  | G | G | A | A | homo | het  | het  |
| No  | chr9  | 286593    | NM_001190458   | 186   | No  | No  | Yes | C | A | A | C | het  | het  | homo |
| No  | chr22 | 32881190  | NM_001033024   | 669   | No  | Yes | No  | G | A | G | G | het  | homo | homo |
| Yes | chr9  | 88959938  | NM_001185074   | 1199  | Yes | Yes | No  | G | G | A | A | homo | homo | het  |
| No  | chr15 | 79237247  | NM_004390      | 174   | Yes | Yes | No  | G | C | C | C | het  | homo | homo |
| No  | chr4  | 39458051  | NM_001024921   | 514   | Yes | No  | No  | T | C | C | C | homo | het  | homo |
| No  | chr11 | 126215438 | NM_014026      | 1273  | No  | Yes | No  | G | A | G | G | het  | homo | homo |
| Yes | chr9  | 88959938  | NM_001185059   | 1089  | Yes | Yes | No  | G | G | A | A | homo | homo | het  |
| No  | chr16 | 27413850  | NM_181079      | 368   | Yes | No  | No  | C | T | C | T | het  | homo | het  |
| No  | chr2  | 213870875 | NM_016260      | 2959  | No  | Yes | Yes | A | A | G | G | homo | homo | het  |
| No  | chr3  | 196663321 | NM_007362      | 1122  | Yes | No  | No  | C | A | A | A | het  | homo | het  |
| No  | chr19 | 11123738  | NM_001128844   | 2748  | Yes | No  | No  | C | T | C | C | het  | homo | homo |
| No  | chr16 | 66646591  | NM_181553      | 742   | No  | Yes | No  | C | C | T | T | homo | het  | het  |
| No  | chr16 | 87788836  | NM_001184856   | 435   | Yes | Yes | No  | C | C | T | T | homo | het  | het  |
| Yes | chr15 | 42192040  | NM_139265      | 2492  | Yes | No  | No  | A | G | A | G | homo | homo | het  |
| No  | chr5  | 150410219 | NM_001258456   | 1713  | Yes | No  | No  | G | T | G | T | het  | homo | het  |
| No  | chr19 | 53115842  | NM_001105552   | 2504  | No  | No  | Yes | G | A | G | A | het  | homo | het  |
| No  | chr11 | 33913568  | NM_005574      | 269   | Yes | No  | No  | A | G | G | G | homo | het  | homo |
| No  | chr22 | 21307058  | NM_005207      | 4346  | No  | Yes | No  | C | T | T | T | homo | het  | het  |
| No  | chr7  | 100804140 | NM_001283      | 880   | No  | Yes | Yes | C | T | C | T | homo | homo | het  |
| Yes | chr17 | 2268311   | NM_001098509   | 1296  | Yes | Yes | No  | G | G | A | A | homo | homo | het  |
| No  | chr22 | 41928145  | NM_001018050   | 686   | No  | No  | Yes | C | C | T | C | homo | het  | homo |
| No  | chr19 | 39369369  | NM_001193286   | 1738  | No  | No  | Yes | A | A | C | C | homo | homo | het  |
| No  | chr1  | 146650363 | NR_002305      | 934   | Yes | No  | Yes | T | A | T | A | het  | homo | het  |
| No  | chr22 | 36537500  | NR_027833      | 1321  | Yes | No  | No  | T | T | A | A | homo | homo | het  |
| No  | chr1  | 23884780  | NM_002167      | 880   | Yes | Yes | No  | A | G | G | G | het  | homo | homo |
| No  | chr7  | 150761680 | NM_001199692   | 1325  | Yes | No  | Yes | C | A | C | A | het  | homo | het  |
| No  | chr14 | 105239894 | NM_001014432   | 1149  | No  | Yes | No  | G | A | G | G | het  | homo | homo |
| No  | chr2  | 238672703 | NM_001137552   | 2639  | Yes | No  | No  | C | G | G | G | het  | homo | homo |
| No  | chr12 | 122812503 | NM_002956      | 3362  | Yes | No  | Yes | C | G | C | G | homo | homo | het  |
| No  | chr7  | 44606098  | NM_019082      | 2158  | No  | No  | Yes | G | G | A | G | homo | het  | homo |
| No  | chr13 | 75936636  | NM_014832      | 953   | No  | No  | Yes | C | C | T | C | homo | het  | homo |
| No  | chr14 | 21820178  | NM_007192      | 4137  | No  | Yes | No  | C | T | C | C | het  | homo | homo |
| No  | chr9  | 135982088 | NM_006266      | 1481  | Yes | No  | Yes | T | T | G | T | homo | het  | homo |
| No  | chr19 | 35648365  | NM_001164605   | 194   | Yes | No  | No  | T | G | T | G | het  | homo | het  |
| No  | chr1  | 27181427  | NM_032283      | 2355  | Yes | No  | No  | G | G | A | A | homo | het  | het  |
| No  | chr14 | 75130235  | NM_001039479   | 3165  | No  | No  | Yes | A | C | C | C | homo | het  | homo |
| No  | chr12 | 24968069  | NM_001178094   | 4454  | No  | Yes | No  | A | G | G | G | het  | homo | homo |
| No  | chr6  | 31604044  | NM_080686      | 5932  | No  | Yes | No  | T | G | G | G | het  | homo | homo |
| No  | chrX  | 2139200   | NM_145177      | 924   | No  | Yes | No  | A | G | G | A | het  | het  | homo |
| No  | chr7  | 150070663 | NM_001099695   | 2697  | Yes | No  | No  | T | C | T | T | het  | homo | homo |
| No  | chrX  | 102930960 | NM_001142423   | 1400  | No  | No  | Yes | T | C | C | C | homo | het  | homo |
| No  | chr7  | 139249414 | NM_001113239   | 12046 | Yes | No  | No  | C | T | C | T | het  | homo | het  |
| No  | chr7  | 150139639 | TCONS_00012895 | 177   | Yes | No  | No  | G | A | G | G | het  | homo | homo |
| No  | chr6  | 52363615  | NM_012288      | 5642  | Yes | No  | No  | C | C | T | C | homo | het  | homo |
| No  | chr1  | 154556663 | NM_001111      | 4542  | No  | No  | Yes | C | T | C | T | het  | homo | het  |
| No  | chr16 | 2569810   | NM_001198569   | 607   | No  | Yes | No  | G | G | C | C | homo | het  | het  |
| No  | chr6  | 26414806  | NM_007048      | 2796  | Yes | No  | No  | A | A | G | G | homo | het  | het  |
| No  | chr17 | 4840868   | NM_001165417   | 1337  | Yes | No  | Yes | C | T | C | T | het  | homo | het  |
| No  | chr5  | 96503378  | NM_001159749   | 1300  | No  | Yes | No  | A | G | A | A | het  | homo | homo |
| No  | chr20 | 44757814  | NM_152854      | 984   | Yes | No  | Yes | C | C | G | C | homo | het  | homo |
| No  | chr6  | 143074700 | NM_006734      | 7628  | No  | Yes | No  | A | G | G | G | homo | het  | het  |
| No  | chr7  | 99694931  | NM_005916      | 1704  | Yes | No  | No  | G | A | G | A | het  | homo | het  |
| No  | chr2  | 202029160 | NM_001202516   | 2267  | No  | No  | Yes | G | T | T | G | het  | het  | homo |
| No  | chr10 | 22825133  | NM_005028      | 2466  | No  | No  | Yes | A | A | G | G | homo | homo | het  |
| No  | chr2  | 198257795 | NM_012433      | 3705  | Yes | No  | No  | A | G | G | G | het  | homo | het  |
| No  | chr6  | 2889600   | NM_004155      | 2050  | No  | Yes | No  | A | T | A | A | het  | homo | homo |
| No  | chr14 | 92583881  | NM_004545      | 274   | No  | No  | Yes | G | G | A | G | homo | het  | homo |
| No  | chr21 | 35515117  | NM_032476      | 773   | Yes | No  | No  | G | A | A | A | het  | homo | het  |
| No  | chr8  | 27311703  | NM_173176      | 2868  | Yes | Yes | No  | T | C | C | C | het  | homo | homo |
| No  | chr14 | 24587639  | NM_181357      | 702   | No  | Yes | No  | G | A | G | G | het  | homo | homo |
| No  | chr2  | 128622491 | NM_001199140   | 1389  | Yes | Yes | No  | C | C | T | T | homo | het  | het  |

|     |       |           |                   |      |     |     |     |   |   |   |   |      |      |      |
|-----|-------|-----------|-------------------|------|-----|-----|-----|---|---|---|---|------|------|------|
| No  | chr19 | 3053574   | NM_198969         | 1077 | No  | Yes | No  | A | A | G | G | homo | het  | het  |
| No  | chr16 | 24955183  | NM_018054         | 1335 | No  | No  | Yes | A | G | G | A | het  | het  | homo |
| No  | chr6  | 32948685  | NR_037625         | 4302 | Yes | No  | No  | C | T | C | T | het  | homo | het  |
| No  | chr12 | 673788    | NM_016533         | 736  | Yes | No  | Yes | T | C | T | C | het  | homo | het  |
| No  | chr1  | 150238699 | NM_016022         | 1366 | Yes | Yes | No  | A | A | G | G | homo | homo | het  |
| No  | chr2  | 71631109  | NM_001252613      | 3262 | Yes | No  | Yes | A | A | G | A | homo | het  | homo |
| No  | chr4  | 26417136  | NM_005349         | 470  | No  | No  | Yes | T | C | C | C | homo | het  | homo |
| No  | chr11 | 130776613 | NM_014758         | 2717 | Yes | No  | No  | T | C | C | C | homo | het  | het  |
| No  | chr19 | 10939792  | NM_001005362      | 2317 | Yes | No  | No  | T | T | C | C | homo | het  | het  |
| No  | chr12 | 124829234 | NM_006312         | 4944 | Yes | Yes | No  | G | A | A | A | het  | homo | homo |
| No  | chr22 | 36537500  | NM_145640         | 995  | Yes | No  | No  | T | T | A | A | homo | homo | het  |
| No  | chr2  | 202029160 | NM_001202517      | 1954 | No  | No  | Yes | G | T | T | G | het  | het  | homo |
| No  | chr22 | 30824755  | NM_001003704      | 759  | Yes | No  | No  | G | G | A | A | homo | het  | het  |
| No  | chr11 | 614243    | NM_001572         | 980  | No  | No  | Yes | G | G | A | G | homo | het  | homo |
| No  | chr1  | 207653364 | NM_001877         | 3096 | No  | Yes | No  | A | A | G | G | homo | het  | het  |
| No  | chr5  | 138266546 | NM_001903         | 2315 | No  | Yes | No  | G | A | G | A | homo | homo | het  |
| No  | chr11 | 62574587  | NM_001244666      | 1617 | No  | No  | Yes | G | G | T | G | homo | het  | homo |
| No  | chr10 | 129901747 | NM_002417         | 8552 | Yes | No  | Yes | G | A | G | A | het  | homo | het  |
| No  | chr6  | 33054331  | NM_002121         | 913  | Yes | No  | No  | T | C | C | C | het  | homo | het  |
| No  | chr7  | 36895342  | NM_001039459      | 759  | No  | Yes | Yes | G | G | A | A | homo | homo | het  |
| No  | chr6  | 32813756  | ENST00000453426.1 | 751  | Yes | Yes | No  | G | G | A | A | homo | het  | het  |
| No  | chr15 | 86278309  | NM_006738         | 7551 | Yes | No  | Yes | G | G | A | G | homo | het  | homo |
| No  | chr22 | 19025330  | NM_005137         | 2949 | No  | Yes | No  | T | T | G | G | homo | het  | het  |
| No  | chr5  | 74037386  | NM_170681         | 1202 | Yes | No  | No  | A | A | T | T | homo | het  | het  |
| No  | chr12 | 24967212  | NM_001178091      | 5307 | Yes | No  | No  | G | A | A | A | het  | homo | homo |
| No  | chr16 | 57399240  | NM_002990         | 2056 | No  | No  | Yes | T | T | C | T | homo | het  | homo |
| Yes | chr14 | 69259662  | NM_001244698      | 970  | Yes | Yes | No  | G | G | T | T | homo | homo | het  |
| No  | chr19 | 1037766   | NM_004368         | 1160 | No  | Yes | No  | G | G | A | A | homo | het  | het  |
| No  | chr10 | 97631492  | NM_001164179      | 7086 | No  | Yes | No  | T | A | T | A | homo | homo | het  |
| No  | chr10 | 97631492  | NM_001164181      | 6856 | No  | Yes | No  | T | A | T | A | homo | homo | het  |
| No  | chr11 | 65408937  | NM_006747         | 712  | Yes | Yes | No  | C | C | T | T | homo | het  | het  |
| No  | chr11 | 121367626 | NM_003105         | 936  | Yes | No  | No  | T | C | C | C | het  | homo | homo |
| No  | chr3  | 170893070 | NM_001161561      | 1089 | No  | No  | Yes | C | T | C | T | het  | homo | het  |
| No  | chr2  | 85824039  | NM_016494         | 362  | Yes | Yes | No  | G | G | A | A | homo | het  | het  |
| No  | chr6  | 31540784  | NM_001159740      | 392  | No  | No  | Yes | C | A | C | A | het  | homo | het  |
| No  | chr5  | 150647012 | NM_000405         | 747  | Yes | No  | No  | A | A | G | A | homo | het  | homo |
| No  | chr21 | 42824733  | NM_001144925      | 2642 | Yes | No  | No  | G | G | A | A | homo | het  | het  |
| No  | chr1  | 154573967 | NM_015840         | 1393 | No  | Yes | No  | A | G | G | G | het  | homo | homo |
| No  | chr10 | 112658060 | NM_001199492      | 1868 | No  | No  | Yes | G | A | A | A | het  | het  | homo |
| No  | chr14 | 23033990  | NM_001344         | 514  | No  | Yes | No  | A | A | G | G | homo | het  | het  |
| No  | chr8  | 38706369  | NM_006283         | 3625 | Yes | No  | No  | C | C | T | C | homo | het  | homo |
| No  | chr2  | 86364115  | NM_017952         | 1897 | No  | Yes | No  | C | A | C | C | het  | homo | homo |
| No  | chr9  | 33676094  | NR_023917         | 1325 | No  | No  | Yes | G | C | G | C | het  | homo | het  |
| No  | chr20 | 463995    | NM_001895         | 2062 | No  | No  | Yes | A | A | G | A | homo | het  | homo |
| No  | chr17 | 75495397  | NM_001113495      | 2358 | No  | Yes | No  | T | T | C | C | homo | homo | het  |
| No  | chr8  | 98703317  | NM_178812         | 1277 | No  | Yes | No  | A | A | G | G | homo | het  | het  |
| No  | chr18 | 9275542   | NM_015208         | 6048 | No  | Yes | No  | C | T | C | C | het  | homo | homo |
| No  | chr16 | 80718879  | NM_152342         | 277  | No  | No  | Yes | T | C | C | C | het  | het  | homo |
| Yes | chr22 | 38273749  | NM_001242923      | 1080 | Yes | No  | No  | T | C | T | C | homo | homo | het  |
| No  | chr6  | 33032968  | NM_001242524      | 1150 | Yes | No  | No  | C | C | T | T | homo | het  | het  |
| No  | chr6  | 31603770  | NM_080686         | 5817 | No  | No  | Yes | A | G | A | G | het  | homo | het  |
| No  | chr6  | 26414806  | NM_001145008      | 2640 | Yes | No  | No  | A | A | G | G | homo | het  | het  |
| No  | chr19 | 15229993  | NM_006844         | 1156 | Yes | No  | No  | T | C | T | C | het  | homo | het  |
| No  | chr2  | 238672703 | NM_001137553      | 2471 | Yes | No  | No  | C | G | G | G | het  | homo | homo |
| Yes | chr19 | 16238279  | NM_005370         | 579  | Yes | No  | Yes | C | T | C | T | homo | homo | het  |
| No  | chr9  | 132651936 | NM_015033         | 2955 | Yes | No  | Yes | G | A | G | A | het  | homo | het  |
| No  | chr10 | 129901747 | NM_001145966      | 7472 | Yes | No  | Yes | G | A | G | A | het  | homo | het  |
| No  | chr9  | 286593    | NM_001193536      | 186  | No  | No  | Yes | C | A | A | C | het  | het  | homo |
| No  | chr11 | 6625566   | NM_001014795      | 360  | Yes | No  | No  | A | G | A | A | het  | homo | homo |
| No  | chr4  | 113198805 | NM_052864         | 1050 | No  | No  | Yes | C | G | G | G | het  | homo | het  |
| No  | chr15 | 80263406  | NM_001114735      | 238  | Yes | No  | No  | G | A | G | A | het  | homo | het  |
| No  | chr5  | 156904633 | NM_033274         | 6160 | No  | Yes | No  | G | G | A | A | homo | het  | het  |
| Yes | chrX  | 119391880 | NM_001184742      | 4937 | Yes | No  | No  | G | A | G | A | homo | homo | het  |

|     |       |           |                   |      |     |     |     |   |   |   |   |      |      |      |
|-----|-------|-----------|-------------------|------|-----|-----|-----|---|---|---|---|------|------|------|
| No  | chr16 | 88788060  | NM_001142864      | 5289 | No  | Yes | Yes | C | T | C | T | homo | homo | het  |
| Yes | chr21 | 46330674  | NM_001127491      | 212  | Yes | Yes | No  | G | T | G | T | homo | homo | het  |
| No  | chr2  | 131131424 | NM_001142370      | 1790 | No  | Yes | No  | G | C | G | G | het  | homo | homo |
| No  | chr17 | 4069735   | NR_047571         | 4770 | Yes | Yes | No  | G | T | G | G | het  | homo | homo |
| Yes | chr10 | 3178881   | NM_002627         | 2541 | Yes | Yes | No  | C | C | T | T | homo | homo | het  |
| No  | chr5  | 157164962 | NM_017872         | 821  | No  | Yes | No  | T | C | C | C | het  | het  | homo |
| No  | chr12 | 94673277  | NR_037687         | 420  | No  | No  | Yes | G | G | A | G | homo | het  | homo |
| No  | chr3  | 47036756  | NM_015175         | 1710 | Yes | No  | No  | C | C | G | G | homo | het  | het  |
| No  | chr11 | 3714489   | NM_016320         | 4705 | No  | Yes | No  | G | A | G | G | het  | homo | homo |
| No  | chr14 | 35032169  | NM_021249         | 1529 | Yes | Yes | No  | G | A | G | G | het  | homo | homo |
| No  | chr16 | 58587737  | NR_049763         | 3237 | Yes | No  | No  | G | G | A | A | homo | het  | het  |
| No  | chr4  | 2826400   | NM_003023         | 561  | No  | Yes | Yes | T | C | T | C | homo | homo | het  |
| No  | chr1  | 94342061  | NM_014597         | 1488 | Yes | No  | Yes | G | A | G | A | het  | homo | het  |
| No  | chr5  | 43290700  | NM_002130         | 2263 | Yes | No  | No  | A | T | T | T | homo | het  | homo |
| No  | chr22 | 43203137  | NM_001142293      | 1441 | Yes | No  | Yes | G | A | G | A | het  | homo | het  |
| Yes | chr14 | 69259662  | NM_001244701      | 295  | Yes | Yes | No  | G | G | T | T | homo | homo | het  |
| No  | chr12 | 124829234 | NM_001206654      | 4914 | Yes | Yes | No  | G | A | A | A | het  | homo | homo |
| No  | chr2  | 242168976 | NM_203346         | 4020 | No  | No  | Yes | A | G | G | G | het  | homo | het  |
| No  | chr10 | 35772402  | NM_181698         | 385  | No  | No  | Yes | G | G | A | G | homo | het  | homo |
| No  | chr7  | 36895342  | NM_001206480      | 2504 | No  | Yes | Yes | G | G | A | A | homo | homo | het  |
| No  | chr1  | 1684472   | NM_001198995      | 1227 | No  | Yes | Yes | G | A | A | G | het  | het  | homo |
| No  | chr20 | 62522466  | NM_199362         | 1969 | No  | Yes | No  | A | G | G | G | homo | het  | het  |
| No  | chr3  | 124802231 | NM_024628         | 2759 | No  | Yes | No  | A | G | G | G | het  | homo | homo |
| Yes | chr17 | 2268311   | NM_014853         | 1298 | Yes | Yes | No  | G | G | A | A | homo | homo | het  |
| No  | chr6  | 32948685  | NM_001113182      | 4210 | Yes | No  | No  | C | T | C | T | het  | homo | het  |
| No  | chr2  | 152132130 | NM_004688         | 832  | No  | No  | Yes | T | C | T | C | het  | homo | het  |
| No  | chr6  | 32902583  | NM_002118         | 1220 | Yes | Yes | No  | C | T | C | C | het  | homo | homo |
| No  | chr1  | 46078884  | NM_002482         | 1629 | No  | No  | Yes | C | T | T | C | het  | het  | homo |
| No  | chr18 | 72167124  | NM_018235         | 175  | No  | Yes | No  | C | G | C | C | het  | homo | homo |
| No  | chr7  | 99693078  | NM_182776         | 2200 | Yes | Yes | No  | C | T | C | C | het  | homo | homo |
| No  | chr6  | 32410987  | NM_019111         | 463  | No  | Yes | No  | A | G | G | G | het  | homo | homo |
| No  | chr2  | 160673526 | NM_001198759      | 4245 | Yes | Yes | No  | T | C | T | C | homo | homo | het  |
| Yes | chr3  | 97664725  | NM_001261829      | 1263 | Yes | Yes | No  | G | A | G | A | homo | homo | het  |
| No  | chr7  | 139288937 | NM_001113239      | 2335 | Yes | No  | No  | G | A | G | G | het  | homo | homo |
| No  | chr6  | 37450914  | NM_138493         | 403  | Yes | No  | Yes | A | G | G | G | het  | homo | het  |
| No  | chr20 | 62522466  | NM_199361         | 1936 | No  | Yes | No  | A | G | G | G | homo | het  | het  |
| No  | chr14 | 35263983  | NM_182648         | 1903 | Yes | No  | No  | A | A | G | G | homo | het  | het  |
| No  | chr1  | 46827728  | NR_045791         | 1678 | Yes | No  | No  | A | A | C | A | homo | het  | homo |
| No  | chr2  | 61705663  | NM_003400         | 4236 | No  | Yes | No  | G | G | A | A | homo | homo | het  |
| No  | chr12 | 25956208  | ENST00000539003.1 | 72   | No  | Yes | No  | T | T | C | C | homo | het  | het  |
| No  | chr2  | 61405865  | NM_152392         | 1311 | Yes | Yes | No  | C | C | G | G | homo | homo | het  |
| No  | chr19 | 42463447  | NM_006423         | 82   | Yes | No  | No  | G | A | A | A | het  | homo | het  |
| No  | chr12 | 94673277  | NM_005761         | 3876 | No  | No  | Yes | G | G | A | G | homo | het  | homo |
| No  | chr3  | 67425727  | NM_003848         | 1768 | Yes | No  | No  | T | C | T | C | homo | homo | het  |
| No  | chr16 | 3724465   | NM_016292         | 1008 | No  | No  | Yes | C | G | C | G | het  | homo | het  |
| No  | chr12 | 122812503 | NM_198240         | 3257 | Yes | No  | Yes | C | G | C | G | homo | homo | het  |
| No  | chr20 | 47261017  | NM_020820         | 3554 | No  | Yes | Yes | A | G | G | G | het  | het  | homo |
| No  | chr9  | 131910644 | NM_178003         | 2034 | No  | No  | Yes | G | A | A | A | homo | het  | homo |
| No  | chr7  | 150139639 | TCONS_00013097    | 228  | Yes | No  | No  | G | A | G | G | het  | homo | homo |
| No  | chr10 | 13375906  | NM_012247         | 848  | No  | Yes | No  | A | G | G | G | homo | het  | het  |
| No  | chr17 | 4622638   | NM_001257331      | 1023 | No  | Yes | Yes | C | C | T | T | homo | homo | het  |
| No  | chr1  | 154561925 | NM_015841         | 2789 | Yes | No  | No  | G | A | G | G | het  | homo | homo |
| No  | chr17 | 4840868   | NM_003562         | 1370 | Yes | No  | Yes | C | T | C | T | het  | homo | het  |
| No  | chr18 | 34376565  | NM_015476         | 1534 | Yes | No  | Yes | G | A | G | A | het  | homo | het  |
| No  | chr4  | 38774889  | NM_001195107      | 2644 | No  | Yes | No  | A | G | A | G | homo | homo | het  |
| No  | chr7  | 127721507 | NM_014390         | 2290 | Yes | Yes | No  | T | C | C | C | homo | het  | het  |
| No  | chrX  | 102930960 | NM_001142418      | 1500 | No  | No  | Yes | T | C | C | C | homo | het  | homo |
| No  | chr6  | 32627807  | NM_001243961      | 1098 | Yes | No  | Yes | T | T | A | A | homo | homo | het  |
| No  | chr16 | 58587737  | NM_001265612      | 3237 | Yes | No  | No  | G | G | A | A | homo | het  | het  |
| No  | chr20 | 43530234  | NM_003404         | 342  | Yes | No  | No  | A | C | C | C | het  | homo | homo |
| No  | chr6  | 29913449  | NM_001242758      | 1399 | Yes | No  | No  | C | G | C | C | het  | homo | homo |
| No  | chr2  | 242082480 | NM_001252119      | 101  | No  | Yes | No  | T | G | T | G | homo | homo | het  |
| No  | chr2  | 170493863 | NM_004792         | 2315 | No  | No  | Yes | A | G | A | G | het  | homo | het  |

|     |       |           |                   |      |     |     |     |   |   |   |   |      |      |      |
|-----|-------|-----------|-------------------|------|-----|-----|-----|---|---|---|---|------|------|------|
| No  | chr19 | 41928652  | ENST00000540732.1 | 1201 | Yes | Yes | No  | C | T | T | T | het  | homo | homo |
| No  | chr5  | 149784658 | NM_001025159      | 714  | Yes | No  | No  | T | T | C | C | homo | het  | het  |
| No  | chr11 | 121502745 | NM_003105         | 9247 | No  | Yes | No  | C | G | G | G | het  | het  | homo |
| No  | chr5  | 74037386  | NM_170691         | 1202 | Yes | No  | No  | A | A | T | T | homo | het  | het  |
| No  | chr19 | 41928652  | NM_000709         | 1011 | Yes | Yes | No  | C | T | T | T | het  | homo | homo |
| No  | chr19 | 35739702  | NM_001260489      | 144  | No  | No  | Yes | G | G | A | G | homo | het  | homo |
| No  | chr14 | 100728770 | NM_003403         | 1289 | Yes | No  | No  | T | G | T | T | het  | homo | homo |
| No  | chr5  | 179297268 | NM_198868         | 2747 | Yes | Yes | No  | C | C | T | T | homo | het  | het  |
| No  | chr8  | 23148978  | NM_001136108      | 1034 | No  | Yes | No  | G | T | G | T | homo | homo | het  |
| No  | chr5  | 150410219 | NM_001252391      | 2104 | Yes | No  | No  | G | T | G | T | het  | homo | het  |
| No  | chr5  | 156907110 | NM_033274         | 3683 | No  | No  | Yes | C | C | A | C | homo | het  | homo |
| Yes | chr1  | 3696890   | NM_020710         | 2542 | Yes | No  | No  | T | T | G | G | homo | homo | het  |
| No  | chr1  | 234582651 | NM_005646         | 2032 | No  | Yes | No  | A | G | G | G | het  | het  | homo |
| No  | chr13 | 113508839 | NM_015205         | 2326 | Yes | Yes | No  | G | G | C | C | homo | het  | het  |
| No  | chr5  | 156821217 | NM_014376         | 5226 | No  | Yes | No  | T | T | C | C | homo | homo | het  |
| No  | chr19 | 35837813  | NM_001185099      | 2577 | Yes | No  | No  | C | C | T | C | homo | het  | homo |
| No  | chr14 | 93263982  | NM_005113         | 382  | Yes | No  | No  | C | C | G | G | homo | het  | het  |
| No  | chr1  | 198691595 | NM_002838         | 1923 | No  | No  | Yes | T | T | A | T | homo | het  | homo |
| No  | chr7  | 50470156  | NM_001220772      | 2736 | Yes | No  | No  | G | C | G | G | het  | homo | homo |
| No  | chr16 | 57283730  | NM_012106         | 501  | No  | No  | Yes | G | A | G | A | het  | homo | het  |
| No  | chr11 | 8707233   | NM_000990         | 693  | Yes | Yes | No  | C | C | T | T | homo | het  | het  |
| No  | chrX  | 148562599 | NM_001166550      | 3504 | No  | Yes | No  | T | C | C | C | homo | het  | het  |
| No  | chr2  | 89165310  | ENST00000430694.1 | 344  | Yes | No  | No  | G | A | G | G | het  | homo | homo |
| No  | chr2  | 25064193  | NM_004036         | 1330 | Yes | No  | No  | C | T | T | T | homo | het  | homo |
| No  | chr17 | 1800600   | NM_002945         | 2097 | Yes | Yes | No  | C | T | T | T | het  | homo | homo |
| No  | chr17 | 80350331  | NR_033265         | 1260 | No  | No  | Yes | C | T | C | T | het  | homo | het  |
| No  | chr19 | 50411742  | NM_153718         | 1606 | Yes | No  | No  | T | C | C | C | homo | het  | homo |
| No  | chr5  | 149776355 | NM_001135245      | 4172 | Yes | No  | No  | G | G | C | C | homo | het  | het  |
| No  | chr1  | 1684472   | NM_023018         | 1434 | No  | Yes | Yes | G | A | A | G | het  | het  | homo |
| No  | chr17 | 40722029  | NM_198205         | 481  | Yes | Yes | No  | A | G | A | G | homo | homo | het  |
| No  | chr1  | 161013121 | NM_007122         | 140  | Yes | No  | Yes | G | A | A | A | homo | het  | homo |
| No  | chr9  | 130938661 | NM_012127         | 2115 | Yes | No  | No  | G | G | A | A | homo | het  | het  |
| No  | chr17 | 74307737  | NM_002766         | 1490 | No  | No  | Yes | A | G | A | G | het  | homo | het  |
| No  | chr17 | 12895855  | NM_173717         | 2875 | Yes | No  | No  | T | A | A | A | homo | het  | homo |
| No  | chr1  | 154573967 | NM_001193495      | 1431 | No  | Yes | No  | A | G | G | G | het  | homo | homo |
| No  | chr4  | 184618936 | NM_199053         | 3001 | No  | Yes | No  | G | G | C | C | homo | het  | het  |
| No  | chr9  | 139726239 | NM_001173988      | 800  | No  | No  | Yes | A | G | G | G | het  | homo | het  |
| Yes | chr21 | 35281393  | ENST00000429238.1 | 166  | Yes | No  | No  | T | C | T | C | homo | homo | het  |
| No  | chr5  | 132093994 | NM_015146         | 2047 | Yes | No  | No  | G | A | G | G | het  | homo | homo |
| No  | chr13 | 50080827  | NM_001040444      | 310  | Yes | Yes | No  | G | G | T | T | homo | het  | het  |
| No  | chr10 | 71142420  | NM_033500         | 1906 | No  | Yes | No  | G | A | A | G | het  | het  | homo |
| No  | chr17 | 4069735   | NM_001257999      | 5091 | Yes | Yes | No  | G | T | G | G | het  | homo | homo |
| No  | chr16 | 4740441   | NM_001142290      | 5937 | No  | Yes | No  | G | C | C | C | homo | het  | het  |
| No  | chr17 | 71238433  | NM_001100622      | 1758 | No  | No  | Yes | G | A | A | A | homo | het  | homo |
| No  | chr19 | 53115842  | NM_001105554      | 2293 | No  | No  | Yes | G | A | G | A | het  | homo | het  |
| No  | chr7  | 50470156  | NM_001220769      | 3159 | Yes | No  | No  | G | C | G | G | het  | homo | homo |
| No  | chr16 | 3777836   | NM_004380         | 7416 | Yes | No  | Yes | A | G | A | G | het  | homo | het  |
| No  | chr14 | 61997226  | NM_006255         | 1979 | Yes | No  | No  | C | T | T | T | het  | homo | homo |
| No  | chr6  | 41568064  | NM_001012427      | 3885 | Yes | Yes | No  | G | A | G | G | het  | homo | homo |
| No  | chrX  | 1584169   | NM_178129         | 1531 | No  | No  | Yes | A | A | G | A | homo | het  | homo |
| No  | chr6  | 32948685  | NM_001199456      | 2613 | Yes | No  | No  | C | T | C | T | het  | homo | het  |
| No  | chr11 | 67200819  | NM_003952         | 889  | No  | Yes | No  | C | T | T | T | homo | het  | het  |
| No  | chr4  | 38777173  | NM_001195108      | 391  | Yes | No  | No  | T | T | A | A | homo | het  | het  |
| No  | chr3  | 38170810  | NM_001607         | 723  | No  | Yes | No  | G | C | G | G | het  | homo | homo |
| No  | chr1  | 14105298  | NM_012231         | 1864 | Yes | No  | No  | G | A | G | A | het  | homo | het  |
| No  | chr1  | 46827728  | NR_045790         | 1860 | Yes | No  | No  | A | A | C | A | homo | het  | homo |
| No  | chr4  | 68442968  | NM_012108         | 436  | No  | Yes | No  | A | G | G | G | homo | het  | het  |
| No  | chr2  | 64751257  | TCONS_00005168    | 171  | No  | No  | Yes | G | G | A | G | homo | het  | homo |
| No  | chr7  | 50470156  | NM_001220767      | 3255 | Yes | No  | No  | G | C | G | G | het  | homo | homo |
| No  | chr12 | 24967212  | NM_001178093      | 5014 | Yes | No  | No  | G | A | A | A | het  | homo | homo |
| No  | chr22 | 36545137  | NR_027833         | 544  | Yes | No  | Yes | T | A | A | A | het  | homo | het  |
| No  | chr1  | 6695331   | NM_018198         | 2190 | Yes | Yes | No  | C | C | A | A | homo | het  | het  |
| No  | chr1  | 171561225 | NM_015172         | 8959 | No  | No  | Yes | C | T | T | T | homo | het  | homo |

|     |       |           |                   |       |     |     |     |   |   |   |   |      |      |      |
|-----|-------|-----------|-------------------|-------|-----|-----|-----|---|---|---|---|------|------|------|
| No  | chr6  | 5109592   | NM_001164841      | 672   | No  | No  | Yes | A | C | C | C | het  | homo | het  |
| No  | chr14 | 35032169  | NM_152233         | 1424  | Yes | Yes | No  | G | A | G | G | het  | homo | homo |
| No  | chr17 | 78368110  | NM_001256071      | 16586 | Yes | No  | No  | G | G | C | G | homo | het  | homo |
| No  | chr9  | 130938661 | NM_001257976      | 1959  | Yes | No  | No  | G | G | A | A | homo | het  | het  |
| No  | chr16 | 31195279  | NM_001170937      | 396   | No  | Yes | No  | C | C | T | T | homo | het  | het  |
| No  | chr14 | 61997226  | ENST00000556347.1 | 188   | Yes | No  | No  | C | T | T | T | het  | homo | homo |
| No  | chr2  | 230632087 | NM_004238         | 6271  | No  | No  | Yes | T | C | T | C | het  | homo | het  |
| No  | chr12 | 125302104 | NM_005505         | 529   | Yes | Yes | No  | C | C | T | T | homo | het  | het  |
| No  | chr4  | 89443162  | NM_032906         | 326   | No  | No  | Yes | C | T | C | T | het  | homo | het  |
| No  | chr17 | 75495397  | NM_001113494      | 2658  | No  | Yes | No  | T | T | C | C | homo | homo | het  |
| No  | chr6  | 26414806  | NM_194441         | 3090  | Yes | No  | No  | A | A | G | G | homo | het  | het  |
| No  | chr4  | 2826400   | NM_001145856      | 510   | No  | Yes | Yes | T | C | T | C | homo | homo | het  |
| No  | chr2  | 85806266  | NM_003761         | 294   | Yes | No  | No  | C | C | T | T | homo | het  | het  |
| Yes | chr1  | 154245142 | NM_006118         | 104   | Yes | No  | No  | T | G | T | G | homo | homo | het  |
| No  | chr1  | 154573967 | NM_015841         | 1393  | No  | Yes | No  | A | G | G | G | het  | homo | homo |
| No  | chr11 | 18424451  | NM_005566         | 755   | Yes | No  | Yes | C | T | C | T | homo | homo | het  |
| No  | chr16 | 87788833  | NM_017566         | 438   | Yes | No  | No  | C | C | A | C | homo | het  | homo |
| No  | chr17 | 2203167   | NM_017575         | 935   | No  | No  | Yes | A | C | A | C | het  | homo | het  |
| No  | chr6  | 32973841  | NM_002119         | 1603  | No  | Yes | No  | C | C | T | T | homo | het  | het  |
| No  | chr11 | 63991581  | NM_001160393      | 673   | Yes | No  | No  | C | T | C | C | het  | homo | homo |
| No  | chr8  | 124332900 | NM_014109         | 4755  | No  | Yes | Yes | C | T | T | C | het  | het  | homo |
| No  | chr7  | 50514577  | NM_022116         | 779   | Yes | No  | No  | G | A | G | G | het  | homo | homo |
| No  | chr1  | 226555302 | NM_001618         | 2456  | No  | Yes | Yes | T | C | C | C | het  | het  | homo |
| No  | chr6  | 31130593  | NM_001077511      | 1661  | No  | No  | Yes | G | A | G | A | het  | homo | het  |
| No  | chr1  | 110201699 | NM_000850         | 848   | No  | No  | Yes | T | C | C | C | het  | homo | het  |
| No  | chr9  | 92003679  | NM_001142287      | 1551  | No  | Yes | Yes | G | A | A | A | het  | het  | homo |
| Yes | chr11 | 10521764  | NM_001172430      | 1988  | Yes | Yes | Yes | T | T | C | C | homo | homo | het  |
| No  | chr20 | 61440971  | NM_007346         | 389   | Yes | No  | No  | G | A | G | G | het  | homo | homo |
| No  | chr1  | 182356399 | NM_001033044      | 736   | No  | No  | Yes | T | C | C | T | het  | het  | homo |
| No  | chr5  | 177637882 | NM_031266         | 1514  | Yes | No  | Yes | G | A | G | A | het  | homo | het  |
| No  | chr14 | 51206145  | NM_016350         | 3561  | No  | Yes | No  | T | T | A | A | homo | het  | het  |
| No  | chr16 | 87788836  | NM_001184854      | 264   | Yes | Yes | No  | C | C | T | T | homo | het  | het  |
| No  | chr22 | 44489896  | NM_001243386      | 162   | Yes | Yes | No  | T | C | C | C | homo | het  | het  |
| No  | chr7  | 5642979   | NM_003088         | 1056  | Yes | No  | No  | T | T | G | T | homo | het  | homo |
| No  | chr11 | 18424487  | NR_028500         | 673   | No  | Yes | No  | A | G | A | G | homo | homo | het  |
| No  | chr6  | 32634350  | NM_002123         | 117   | Yes | No  | No  | A | G | A | G | het  | homo | het  |
| No  | chr15 | 85669452  | NM_002605         | 2289  | Yes | No  | Yes | C | T | C | T | het  | homo | het  |
| No  | chr17 | 61888461  | NM_007372         | 1583  | No  | No  | Yes | G | A | G | A | het  | homo | het  |
| No  | chr5  | 171533656 | NM_005990         | 1056  | No  | No  | Yes | G | A | A | A | het  | homo | het  |
| No  | chr9  | 123665019 | NM_001190945      | 3955  | No  | No  | Yes | T | T | C | T | homo | het  | homo |
| No  | chr2  | 160676350 | NM_001198760      | 4114  | Yes | Yes | No  | A | A | G | G | homo | het  | het  |
| No  | chr1  | 28836046  | NR_002909         | 880   | Yes | No  | No  | C | T | C | C | het  | homo | homo |
| Yes | chr6  | 32412480  | NM_019111         | 937   | Yes | Yes | No  | G | G | A | A | homo | homo | het  |
| Yes | chr4  | 2906707   | NM_001119         | 1566  | Yes | Yes | No  | G | T | G | T | homo | homo | het  |
| Yes | chr14 | 50575821  | NM_001040662      | 1208  | Yes | Yes | No  | C | C | T | T | homo | homo | het  |
| No  | chr22 | 44489896  | NM_001243385      | 135   | Yes | Yes | No  | T | C | C | C | homo | het  | het  |
| No  | chr12 | 6631169   | NM_014865         | 1966  | No  | No  | Yes | C | C | A | A | homo | homo | het  |
| No  | chr22 | 32875190  | NM_012179         | 628   | Yes | Yes | No  | G | A | G | G | het  | homo | homo |
| No  | chr3  | 193334991 | NM_130834         | 707   | Yes | No  | Yes | G | A | G | A | het  | homo | het  |
| No  | chr3  | 105260518 | NM_001243280      | 1596  | No  | Yes | No  | G | A | A | A | het  | het  | homo |
| No  | chr10 | 71873919  | NM_032797         | 1351  | No  | No  | Yes | G | A | G | A | het  | homo | het  |
| No  | chr16 | 315557    | NM_032039         | 2390  | Yes | No  | No  | C | G | C | G | homo | homo | het  |
| No  | chr17 | 7411770   | NM_000937         | 3827  | Yes | No  | No  | C | T | T | T | het  | homo | homo |
| No  | chr11 | 63991581  | NM_001033678      | 875   | Yes | No  | No  | C | T | C | C | het  | homo | homo |
| No  | chr17 | 7215536   | NM_001143761      | 1038  | Yes | Yes | No  | T | C | T | C | homo | homo | het  |
| No  | chr19 | 49469087  | NM_000146         | 362   | No  | Yes | No  | T | C | C | C | het  | het  | homo |
| No  | chr22 | 17630486  | NM_033070         | 304   | Yes | No  | No  | G | T | T | T | het  | homo | het  |
| No  | chr2  | 219267781 | NM_021198         | 738   | No  | No  | Yes | C | C | T | T | homo | homo | het  |
| No  | chr22 | 38881454  | NM_001098504      | 2785  | Yes | No  | No  | T | G | G | G | homo | het  | homo |
| No  | chr9  | 107515214 | NM_015469         | 404   | No  | No  | Yes | G | A | G | A | homo | homo | het  |
| No  | chr11 | 89956206  | NM_001144073      | 327   | No  | No  | Yes | C | T | T | C | het  | het  | homo |
| No  | chr16 | 69497248  | NM_030579         | 1367  | No  | Yes | No  | T | G | G | G | het  | homo | homo |
| No  | chr1  | 156206121 | NM_001199662      | 439   | No  | Yes | No  | G | G | A | A | homo | het  | het  |



|     |       |           |                   |      |     |     |     |   |   |   |   |      |      |      |
|-----|-------|-----------|-------------------|------|-----|-----|-----|---|---|---|---|------|------|------|
| No  | chr1  | 15959977  | NM_032341         | 762  | No  | No  | Yes | C | C | T | C | homo | het  | homo |
| No  | chr4  | 88060025  | NM_005935         | 7212 | Yes | No  | No  | C | A | A | A | homo | het  | homo |
| No  | chr15 | 80263217  | NM_004049         | 427  | No  | No  | Yes | G | A | G | A | het  | homo | het  |
| No  | chr1  | 19950062  | NM_001032363      | 276  | No  | No  | Yes | T | C | T | C | het  | homo | het  |
| No  | chr10 | 35302705  | NM_001198777      | 2146 | No  | Yes | No  | G | A | G | G | het  | homo | homo |
| No  | chr19 | 17312992  | NM_004145         | 4868 | No  | Yes | Yes | C | T | C | T | homo | homo | het  |
| No  | chr15 | 64706332  | NM_016213         | 1152 | No  | No  | Yes | A | A | G | G | homo | homo | het  |
| No  | chr20 | 4764629   | NM_170774         | 1325 | Yes | No  | No  | C | C | T | C | homo | het  | homo |
| No  | chr11 | 5717762   | NM_006074         | 679  | Yes | No  | Yes | T | C | T | C | het  | homo | het  |
| No  | chr22 | 32108824  | NM_173566         | 5194 | Yes | No  | No  | A | A | T | T | homo | het  | het  |
| No  | chr8  | 42174380  | NR_033819         | 1269 | No  | Yes | No  | G | G | A | A | homo | het  | het  |
| No  | chr5  | 127469859 | NM_001256461      | 1355 | No  | Yes | No  | A | G | A | A | het  | homo | homo |
| No  | chr2  | 202029160 | NM_001202515      | 1466 | No  | No  | Yes | G | T | T | G | het  | het  | homo |
| No  | chr8  | 42174380  | NM_001190720      | 1146 | No  | Yes | No  | G | G | A | A | homo | het  | het  |
| No  | chr2  | 191829353 | NM_014905         | 3915 | No  | No  | Yes | C | G | G | G | het  | het  | homo |
| No  | chr5  | 96503378  | NM_018343         | 1300 | No  | Yes | No  | A | G | A | A | het  | homo | homo |
| No  | chr4  | 38777173  | NM_001195107      | 360  | Yes | No  | No  | T | T | A | A | homo | het  | het  |
| No  | chr11 | 5701074   | NM_033093         | 489  | No  | Yes | No  | G | T | G | G | het  | homo | homo |
| No  | chr4  | 38776180  | NM_001195108      | 1384 | Yes | No  | Yes | G | T | G | T | homo | homo | het  |
| No  | chr5  | 118729286 | NM_014350         | 997  | Yes | Yes | No  | C | T | C | C | het  | homo | homo |
| No  | chr16 | 15960226  | NM_144600         | 1601 | Yes | No  | No  | A | G | G | G | homo | het  | homo |
| No  | chr3  | 124802677 | NM_001195483      | 2252 | Yes | Yes | No  | T | C | C | C | het  | homo | homo |
| No  | chr6  | 31122315  | NM_001105564      | 948  | Yes | No  | Yes | C | G | C | G | het  | homo | het  |
| No  | chr12 | 24968749  | NM_001178092      | 3698 | No  | Yes | No  | T | C | C | C | het  | homo | homo |
| No  | chr1  | 156206121 | ENST00000490491.1 | 445  | No  | Yes | No  | G | G | A | A | homo | het  | het  |
| No  | chr11 | 5717762   | NM_001199573      | 679  | Yes | No  | Yes | T | C | T | C | het  | homo | het  |
| No  | chr6  | 33052768  | NM_002121         | 522  | No  | No  | Yes | T | C | C | C | het  | homo | het  |
| No  | chr10 | 13375906  | NM_001195602      | 577  | No  | Yes | No  | A | G | G | G | homo | het  | het  |
| No  | chr5  | 74062881  | NM_170681         | 162  | Yes | Yes | No  | G | A | G | G | het  | homo | homo |
| No  | chr12 | 24968749  | NM_001178094      | 3774 | No  | Yes | No  | T | C | C | C | het  | homo | homo |
| No  | chr4  | 75938236  | NM_015393         | 898  | No  | No  | Yes | A | G | G | A | het  | het  | homo |
| No  | chr5  | 150410219 | NM_001258454      | 2207 | Yes | No  | No  | G | T | G | T | het  | homo | het  |
| No  | chr20 | 52192637  | NM_006526         | 2937 | Yes | No  | No  | A | G | A | A | het  | homo | homo |
| No  | chr12 | 124829234 | NM_001077261      | 4914 | Yes | Yes | No  | G | A | A | A | het  | homo | homo |
| No  | chr10 | 14562201  | NM_031453         | 2143 | No  | Yes | No  | C | T | C | C | het  | homo | homo |
| No  | chr2  | 202029160 | NM_001202519      | 2793 | No  | No  | Yes | G | T | T | G | het  | het  | homo |
| No  | chr5  | 140903792 | NM_005219         | 3720 | No  | Yes | No  | C | T | C | C | het  | homo | homo |
| No  | chr22 | 20052532  | NM_152906         | 1356 | No  | No  | Yes | C | C | G | C | homo | het  | homo |
| No  | chr6  | 32627882  | NM_001243961      | 1023 | No  | Yes | No  | G | G | A | A | homo | homo | het  |
| Yes | chr6  | 32975257  | NM_002119         | 520  | Yes | No  | No  | G | A | G | A | homo | homo | het  |
| No  | chr21 | 42824733  | NM_002462         | 2216 | Yes | No  | No  | G | G | A | A | homo | het  | het  |
| No  | chr4  | 2826400   | NM_001145855      | 563  | No  | Yes | Yes | T | C | T | C | homo | homo | het  |
| No  | chr16 | 4740441   | NM_001142291      | 5871 | No  | Yes | No  | G | C | C | C | homo | het  | het  |
| No  | chr6  | 109688114 | NM_001142402      | 2658 | Yes | No  | No  | T | T | C | T | homo | het  | homo |
| No  | chr22 | 30977353  | NM_001243225      | 897  | No  | No  | Yes | A | T | A | T | het  | homo | het  |
| No  | chr1  | 40773123  | NM_001852         | 1073 | Yes | No  | Yes | C | G | C | G | het  | homo | het  |
| No  | chr22 | 36678453  | NM_002473         | 6375 | Yes | No  | Yes | G | G | C | G | homo | het  | homo |
| Yes | chr11 | 10521764  | NM_001172431      | 1684 | Yes | Yes | Yes | T | T | C | C | homo | homo | het  |
| No  | chr3  | 48508585  | NM_033629         | 1037 | No  | Yes | No  | C | T | T | T | het  | het  | homo |
| No  | chr14 | 106405791 | ENST00000390593.2 | 235  | Yes | Yes | No  | G | C | G | G | het  | homo | homo |
| No  | chr22 | 41551039  | NM_001429         | 3578 | No  | No  | Yes | T | A | A | A | het  | homo | het  |
| No  | chr12 | 113596866 | NM_001111322      | 2493 | Yes | No  | No  | C | T | C | C | het  | homo | homo |
| No  | chr1  | 146740502 | NM_004284         | 1113 | Yes | No  | Yes | C | C | G | C | homo | het  | homo |
| Yes | chr20 | 61598899  | NM_022082         | 1542 | Yes | No  | Yes | A | G | A | G | homo | homo | het  |
| No  | chr6  | 33032968  | NM_001242525      | 1074 | Yes | No  | No  | C | C | T | T | homo | het  | het  |
| No  | chr9  | 88903367  | NM_024617         | 4961 | Yes | No  | Yes | A | T | A | T | homo | homo | het  |
| No  | chr18 | 72167120  | NM_001168499      | 298  | Yes | No  | No  | G | G | A | G | homo | het  | homo |
| No  | chr4  | 184618936 | NM_021942         | 3001 | No  | Yes | No  | G | G | C | C | homo | het  | het  |
| No  | chr11 | 62496519  | NM_173810         | 568  | Yes | Yes | No  | T | T | C | C | homo | het  | het  |
| No  | chr17 | 4622638   | NM_001257328      | 1131 | No  | Yes | Yes | C | C | T | T | homo | homo | het  |
| No  | chr2  | 71654175  | NM_014497         | 5499 | Yes | No  | No  | G | G | A | G | homo | het  | homo |
| No  | chr12 | 27064232  | NM_018164         | 2361 | No  | Yes | No  | G | A | A | A | homo | het  | het  |
| No  | chr19 | 39926509  | NM_001020         | 110  | Yes | No  | Yes | T | G | T | G | het  | homo | het  |

|     |       |           |                   |      |     |     |     |   |   |   |   |      |      |      |
|-----|-------|-----------|-------------------|------|-----|-----|-----|---|---|---|---|------|------|------|
| No  | chr14 | 24587639  | NM_001163484      | 900  | No  | Yes | No  | G | A | G | G | het  | homo | homo |
| No  | chr6  | 33037626  | NM_001242525      | 260  | No  | Yes | No  | G | G | C | C | homo | het  | het  |
| Yes | chr9  | 140167022 | NM_015456         | 1754 | Yes | No  | Yes | G | G | A | A | homo | homo | het  |
| No  | chr19 | 1032689   | NM_004368         | 747  | Yes | No  | No  | G | T | G | G | het  | homo | homo |
| No  | chr22 | 44602229  | NM_001137606      | 1162 | Yes | No  | Yes | A | C | C | C | homo | het  | homo |
| Yes | chr16 | 30003076  | NM_004783         | 4154 | Yes | No  | No  | G | A | G | A | homo | homo | het  |
| No  | chr5  | 7878179   | NM_024010         | 635  | No  | No  | Yes | C | T | T | C | het  | het  | homo |
| Yes | chr11 | 10521764  | NM_000480         | 2061 | Yes | Yes | Yes | T | T | C | C | homo | homo | het  |
| No  | chr7  | 66459256  | NM_016038         | 385  | Yes | Yes | No  | A | G | A | A | het  | homo | homo |
| No  | chr8  | 53555069  | NM_001083617      | 4737 | No  | Yes | No  | T | C | C | C | het  | het  | homo |
| No  | chr12 | 24968150  | NM_001178091      | 4369 | Yes | No  | No  | T | G | G | G | het  | homo | homo |
| No  | chr22 | 30824755  | ENST00000439838.1 | 1251 | Yes | No  | No  | G | G | A | A | homo | het  | het  |
| No  | chr2  | 160676350 | NM_002349         | 4114 | Yes | Yes | No  | A | A | G | G | homo | het  | het  |
| No  | chr7  | 29960812  | NM_014766         | 4175 | No  | Yes | No  | A | A | T | T | homo | het  | het  |
| No  | chr6  | 32609192  | NM_002122         | 241  | No  | No  | Yes | A | G | A | G | het  | homo | het  |
| No  | chr13 | 46701233  | NM_002298         | 2615 | No  | No  | Yes | T | A | A | A | het  | homo | het  |
| No  | chr9  | 86595498  | NM_031262         | 72   | No  | Yes | No  | C | C | T | T | homo | het  | het  |
| No  | chr2  | 86385728  | NM_006839         | 1537 | Yes | No  | Yes | G | G | A | G | homo | het  | homo |
| No  | chr5  | 150410219 | NM_001252386      | 2035 | Yes | No  | No  | G | T | G | T | het  | homo | het  |
| No  | chr19 | 45912736  | NM_012099         | 1998 | Yes | No  | Yes | C | C | A | C | homo | het  | homo |
| No  | chr22 | 19025330  | NM_001173533      | 2826 | No  | Yes | No  | T | T | G | G | homo | het  | het  |
| No  | chr19 | 1079959   | NM_001258328      | 1696 | Yes | Yes | No  | G | G | A | A | homo | het  | het  |
| No  | chr11 | 88070858  | NM_001114173      | 84   | No  | Yes | No  | T | T | C | C | homo | het  | het  |
| Yes | chr14 | 50575821  | NM_024558         | 1313 | Yes | Yes | No  | C | C | T | T | homo | homo | het  |
| No  | chr14 | 23034026  | NM_001344         | 478  | Yes | Yes | No  | G | G | C | C | homo | het  | het  |
| No  | chr7  | 940181    | NM_006869         | 897  | Yes | No  | Yes | G | A | A | A | homo | het  | homo |
| No  | chr17 | 43319770  | NM_005892         | 2148 | No  | Yes | Yes | C | C | T | T | homo | homo | het  |
| No  | chr19 | 3053574   | NM_198970         | 1007 | No  | Yes | No  | A | A | G | G | homo | het  | het  |
| No  | chr6  | 32819968  | NM_000593         | 1097 | Yes | No  | No  | C | C | T | T | homo | het  | het  |
| No  | chr19 | 10939792  | NM_001005360      | 2329 | Yes | No  | No  | T | T | C | C | homo | het  | het  |
| No  | chr2  | 242082480 | NM_001252122      | 101  | No  | Yes | No  | T | G | T | G | homo | homo | het  |
| No  | chr19 | 1014398   | NM_001033026      | 446  | Yes | Yes | No  | T | C | C | C | het  | homo | homo |
| No  | chr2  | 71304738  | NM_017567         | 1222 | Yes | No  | No  | G | A | G | A | het  | homo | het  |
| Yes | chr8  | 27255263  | NM_173175         | 317  | Yes | No  | No  | A | A | G | G | homo | homo | het  |
| No  | chr2  | 232035429 | NR_034059         | 2857 | Yes | No  | Yes | G | A | G | A | het  | homo | het  |
| No  | chr19 | 11123738  | NM_003072         | 2672 | Yes | No  | No  | C | T | C | C | het  | homo | homo |
| No  | chr3  | 120049117 | NM_001099678      | 2142 | No  | No  | Yes | A | G | G | G | homo | het  | homo |
| No  | chr1  | 182352621 | NM_001033056      | 2284 | No  | Yes | No  | A | G | G | A | het  | het  | homo |
| No  | chr4  | 38776180  | NM_001195106      | 1481 | Yes | No  | Yes | G | T | G | T | homo | homo | het  |
| No  | chr16 | 4740441   | NM_001142289      | 3334 | No  | Yes | No  | G | C | C | C | homo | het  | het  |
| No  | chr4  | 185615532 | NM_024629         | 2237 | Yes | No  | Yes | T | A | A | A | het  | homo | het  |
| No  | chr19 | 10794630  | NM_004516         | 2360 | Yes | Yes | No  | G | T | T | T | homo | het  | het  |
| No  | chr2  | 209212707 | NM_015040         | 5492 | No  | No  | Yes | G | A | A | A | homo | het  | homo |
| No  | chr2  | 89185406  | ENST00000390243.2 | 275  | Yes | Yes | No  | T | C | T | T | het  | homo | homo |
| No  | chr3  | 88101551  | NM_001008390      | 4088 | No  | Yes | No  | C | T | T | T | homo | het  | het  |
| No  | chr1  | 154573967 | NM_001025107      | 1262 | No  | Yes | No  | A | G | G | G | het  | homo | homo |
| No  | chr10 | 98411293  | NM_152309         | 956  | No  | No  | Yes | C | C | T | C | homo | het  | homo |
| No  | chr10 | 35302705  | NM_003591         | 2138 | No  | Yes | No  | G | A | G | G | het  | homo | homo |
| No  | chr17 | 71238433  | NM_017941         | 1758 | No  | No  | Yes | G | A | A | A | homo | het  | homo |
| No  | chr12 | 120119183 | NM_006253         | 2155 | No  | No  | Yes | T | T | G | G | homo | homo | het  |
| No  | chr11 | 252851    | NM_002817         | 1624 | Yes | No  | No  | A | A | G | G | homo | het  | het  |
| No  | chr20 | 4764682   | NM_170774         | 1272 | Yes | No  | Yes | A | G | G | G | homo | het  | homo |
| Yes | chr3  | 97664725  | NM_153182         | 1266 | Yes | Yes | No  | G | A | G | A | homo | homo | het  |
| No  | chr14 | 66209190  | NM_178156         | 3419 | No  | No  | Yes | C | C | G | C | homo | het  | homo |
| No  | chr16 | 58587737  | NM_206999         | 3252 | Yes | No  | No  | G | G | A | A | homo | het  | het  |
| No  | chr20 | 46268493  | NM_001174088      | 3126 | Yes | No  | No  | A | A | G | G | homo | het  | het  |
| No  | chr6  | 33037626  | NM_033554         | 245  | No  | Yes | No  | G | G | C | C | homo | het  | het  |
| No  | chr8  | 29207872  | NM_001394         | 396  | Yes | No  | No  | C | T | C | C | het  | homo | homo |
| Yes | chr17 | 37921742  | NR_047559         | 2019 | Yes | No  | No  | G | A | G | A | homo | homo | het  |
| No  | chr17 | 20903068  | NM_015276         | 5058 | Yes | No  | No  | G | G | T | G | homo | het  | homo |
| No  | chr20 | 4762736   | NM_014737         | 3360 | No  | No  | Yes | C | G | G | G | homo | het  | homo |
| No  | chr2  | 242082480 | NM_001252124      | 101  | No  | Yes | No  | T | G | T | G | homo | homo | het  |
| No  | chr1  | 64097432  | NM_001172819      | 751  | No  | No  | Yes | C | T | T | C | het  | het  | homo |

|     |       |           |                   |       |     |     |     |   |   |   |   |      |      |      |
|-----|-------|-----------|-------------------|-------|-----|-----|-----|---|---|---|---|------|------|------|
| No  | chr11 | 840363    | NM_021128         | 234   | Yes | Yes | No  | G | A | G | G | het  | homo | homo |
| No  | chr22 | 50720622  | NM_012401         | 3201  | No  | No  | Yes | G | A | A | G | het  | het  | homo |
| No  | chrX  | 2632482   | NM_002414         | 261   | No  | Yes | Yes | C | C | T | T | homo | homo | het  |
| No  | chr9  | 95005537  | NM_013417         | 3218  | Yes | No  | No  | T | T | G | T | homo | het  | homo |
| No  | chr11 | 6703334   | NM_022061         | 648   | Yes | Yes | No  | T | C | T | T | het  | homo | homo |
| No  | chr3  | 124802677 | NM_024628         | 2313  | Yes | Yes | No  | T | C | C | C | het  | homo | homo |
| No  | chr19 | 4910889   | NM_001048201      | 160   | Yes | No  | No  | G | G | T | G | homo | het  | homo |
| No  | chr1  | 171556165 | NM_015172         | 8033  | Yes | No  | No  | G | C | C | C | homo | het  | homo |
| No  | chr2  | 109301687 | NM_001193483      | 2454  | Yes | Yes | No  | G | C | C | C | homo | het  | het  |
| No  | chr6  | 7405508   | NM_031480         | 1297  | Yes | Yes | No  | G | G | A | A | homo | het  | het  |
| No  | chr6  | 33036435  | NM_033554         | 882   | No  | Yes | No  | A | A | C | C | homo | het  | het  |
| No  | chr12 | 62696599  | NM_006313         | 321   | Yes | No  | No  | C | T | T | T | homo | het  | homo |
| No  | chr13 | 111938511 | NM_003899         | 1994  | Yes | No  | Yes | T | T | C | T | homo | het  | homo |
| No  | chr2  | 201437048 | NM_001160046      | 2092  | No  | Yes | No  | A | A | G | G | homo | het  | het  |
| No  | chr19 | 18685964  | NM_001033930      | 505   | No  | No  | Yes | G | G | T | G | homo | het  | homo |
| No  | chr19 | 11123738  | NM_001128847      | 2388  | Yes | No  | No  | C | T | C | C | het  | homo | homo |
| No  | chr19 | 39369369  | NR_034146         | 1821  | No  | No  | Yes | A | A | C | C | homo | homo | het  |
| No  | chr20 | 44691350  | NM_020967         | 1483  | No  | No  | Yes | A | C | A | C | homo | homo | het  |
| No  | chr10 | 71142420  | NM_033498         | 1813  | No  | Yes | No  | G | A | A | G | het  | het  | homo |
| No  | chr5  | 96503523  | NM_018343         | 1155  | Yes | No  | No  | G | A | A | A | het  | homo | het  |
| No  | chr5  | 179260213 | NM_001142298      | 1044  | Yes | No  | No  | G | G | A | A | homo | het  | het  |
| No  | chr10 | 97631492  | NM_001164183      | 6940  | No  | Yes | No  | T | A | T | A | homo | homo | het  |
| Yes | chr7  | 99696797  | NM_005916         | 941   | Yes | No  | Yes | A | A | G | G | homo | homo | het  |
| No  | chr15 | 70352968  | NM_005078         | 1734  | No  | Yes | Yes | G | G | C | C | homo | homo | het  |
| No  | chr11 | 6625566   | NM_004517         | 246   | Yes | No  | No  | A | G | A | A | het  | homo | homo |
| No  | chr5  | 437586    | NM_020731         | 4841  | No  | No  | Yes | G | A | A | A | het  | homo | het  |
| No  | chr14 | 105476853 | NM_145701         | 984   | Yes | Yes | No  | G | A | A | A | het  | homo | homo |
| No  | chr7  | 28862379  | NM_001011666      | 4640  | No  | No  | Yes | G | A | G | A | het  | homo | het  |
| No  | chr14 | 24587639  | NM_025230         | 1350  | No  | Yes | No  | G | A | G | G | het  | homo | homo |
| No  | chr7  | 97922875  | NM_018842         | 1757  | No  | No  | Yes | C | C | T | C | homo | het  | homo |
| No  | chr1  | 146740502 | NM_001256338      | 501   | Yes | No  | Yes | C | C | G | C | homo | het  | homo |
| No  | chr11 | 62334908  | NM_001404         | 761   | Yes | No  | No  | C | C | G | G | homo | het  | het  |
| No  | chr8  | 27301725  | NM_004103         | 2404  | No  | No  | Yes | C | C | G | C | homo | het  | homo |
| No  | chr2  | 43451043  | NM_006887         | 2191  | No  | Yes | No  | C | T | C | C | het  | homo | homo |
| No  | chr19 | 10939792  | NM_004945         | 2317  | Yes | No  | No  | T | T | C | C | homo | het  | het  |
| Yes | chr8  | 27255080  | NM_173176         | 219   | Yes | Yes | No  | A | A | G | G | homo | homo | het  |
| No  | chr20 | 47258763  | NM_020820         | 3741  | No  | Yes | No  | G | G | A | A | homo | het  | het  |
| No  | chr2  | 89185454  | ENST00000390243.2 | 323   | Yes | Yes | No  | T | C | T | T | het  | homo | homo |
| No  | chr19 | 35837813  | NM_001771         | 2841  | Yes | No  | No  | C | C | T | C | homo | het  | homo |
| No  | chr22 | 36545137  | NR_027835         | 315   | Yes | No  | Yes | T | A | A | A | het  | homo | het  |
| No  | chr16 | 8941934   | NM_000303         | 1063  | No  | No  | Yes | C | A | A | A | het  | homo | het  |
| No  | chr5  | 7878179   | NM_002454         | 661   | No  | No  | Yes | C | T | T | C | het  | het  | homo |
| No  | chr1  | 16134072  | NM_001089591      | 123   | Yes | Yes | No  | G | G | A | A | homo | het  | het  |
| No  | chr7  | 43664280  | NM_004760         | 1235  | No  | No  | Yes | A | G | G | G | het  | homo | het  |
| Yes | chr1  | 33145742  | NM_001135255      | 1870  | Yes | Yes | Yes | A | G | A | G | homo | homo | het  |
| No  | chr1  | 46827728  | NM_001256128      | 1592  | Yes | No  | No  | A | A | C | A | homo | het  | homo |
| No  | chr6  | 32628022  | NM_001243961      | 883   | Yes | No  | No  | T | C | T | C | het  | homo | het  |
| No  | chr22 | 44368122  | NM_015380         | 526   | No  | Yes | No  | A | G | A | A | het  | homo | homo |
| No  | chr1  | 1684169   | NM_001198995      | 1530  | No  | No  | Yes | G | C | C | G | het  | het  | homo |
| No  | chr9  | 140006425 | NM_013379         | 1137  | No  | No  | Yes | G | C | C | C | het  | het  | homo |
| No  | chr2  | 32800422  | NM_016252         | 13478 | Yes | No  | Yes | C | G | C | G | het  | homo | het  |
| No  | chr19 | 17430915  | NM_024050         | 886   | Yes | No  | Yes | G | A | G | A | het  | homo | het  |
| No  | chr1  | 55319902  | NM_014762         | 1155  | No  | Yes | No  | T | C | C | C | het  | het  | homo |
| No  | chr5  | 110456263 | NM_139281         | 2259  | No  | No  | Yes | C | G | C | G | het  | homo | het  |
| No  | chr13 | 111938511 | NM_001113513      | 1881  | Yes | No  | Yes | T | T | C | T | homo | het  | homo |
| No  | chr10 | 99126249  | NM_001145114      | 3301  | Yes | No  | No  | C | T | C | C | het  | homo | homo |
| Yes | chr6  | 32546818  | NM_001243965      | 918   | Yes | Yes | No  | G | G | A | A | homo | homo | het  |
| No  | chr20 | 46283383  | NM_181659         | 5758  | Yes | No  | No  | A | A | G | A | homo | het  | homo |
| No  | chr8  | 126091044 | NM_014846         | 976   | No  | Yes | No  | C | T | C | C | het  | homo | homo |
| No  | chr6  | 32412566  | NM_019111         | 1023  | No  | No  | Yes | T | A | T | A | het  | homo | het  |
| No  | chr19 | 6415176   | NM_003685         | 2213  | No  | No  | Yes | G | A | G | A | het  | homo | het  |
| No  | chr12 | 67706466  | NM_018448         | 3986  | Yes | No  | No  | G | A | A | A | homo | het  | het  |
| No  | chr6  | 32627830  | NM_001243961      | 1075  | Yes | No  | No  | G | A | G | A | het  | homo | het  |

|     |       |           |                   |      |     |     |     |   |   |   |   |      |      |      |
|-----|-------|-----------|-------------------|------|-----|-----|-----|---|---|---|---|------|------|------|
| Yes | chr14 | 50575821  | NR_049739         | 1409 | Yes | Yes | No  | C | C | T | T | homo | homo | het  |
| No  | chr1  | 154556663 | NM_001193495      | 4580 | No  | No  | Yes | C | T | C | T | het  | homo | het  |
| No  | chr1  | 33145742  | NM_005610         | 1873 | No  | Yes | Yes | A | G | A | G | homo | homo | het  |
| No  | chr22 | 36863491  | NM_012473         | 938  | No  | Yes | No  | C | C | T | T | homo | het  | het  |
| No  | chr20 | 4764629   | NM_014737         | 1467 | Yes | No  | No  | C | C | T | C | homo | het  | homo |
| No  | chr19 | 39369369  | NM_012237         | 1898 | No  | No  | Yes | A | A | C | C | homo | homo | het  |
| No  | chr9  | 139726239 | NM_024718         | 800  | No  | No  | Yes | A | G | G | G | het  | homo | het  |
| No  | chr8  | 80976814  | NM_001025252      | 476  | Yes | No  | No  | G | G | T | T | homo | het  | het  |
| No  | chr1  | 55315941  | ENST00000458389.1 | 132  | Yes | No  | Yes | C | A | C | A | het  | homo | het  |
| No  | chr15 | 74328116  | NM_033244         | 2462 | Yes | Yes | No  | A | G | A | A | het  | homo | homo |
| No  | chr5  | 127469859 | NR_046207         | 1355 | No  | Yes | No  | A | G | A | A | het  | homo | homo |
| No  | chr5  | 176929185 | NM_001144875      | 2056 | No  | No  | Yes | C | G | G | G | het  | het  | homo |
| No  | chr1  | 28836046  | NR_036473         | 988  | Yes | No  | No  | C | T | C | C | het  | homo | homo |
| No  | chr1  | 43825644  | NM_001255         | 533  | No  | No  | Yes | T | T | C | C | homo | homo | het  |
| No  | chr7  | 150070663 | NM_013400         | 2822 | Yes | No  | No  | T | C | T | T | het  | homo | homo |
| No  | chr22 | 36537500  | NR_027834         | 1205 | Yes | No  | No  | T | T | A | A | homo | homo | het  |
| No  | chr9  | 139726239 | NM_001173989      | 800  | No  | No  | Yes | A | G | G | G | het  | homo | het  |
| No  | chr19 | 49377319  | NM_014330         | 1098 | Yes | No  | No  | A | A | G | G | homo | het  | het  |
| No  | chr19 | 10395683  | NM_000201         | 1724 | No  | Yes | No  | A | G | G | G | homo | het  | het  |
| No  | chr4  | 1981256   | NM_133331         | 5032 | Yes | No  | Yes | T | G | T | G | het  | homo | het  |
| No  | chr10 | 11356160  | NM_001025076      | 1249 | No  | Yes | No  | C | T | C | T | homo | homo | het  |

## Supplementary Table 4

## RiboSNitches that overlap with eQTLs

| SNPID       | Chr   | Position  | Gene      | Transcript   | Base | eQTL SNPID  | Type | eQTL Gene       |
|-------------|-------|-----------|-----------|--------------|------|-------------|------|-----------------|
| rs2920      | chr1  | 23884780  | ID3       | NM_002167    | 880  | rs2920      | eQTL | ENSG00000117318 |
| rs1053627   | chr1  | 46827728  | NSUN4     | NR_045790    | 1860 | rs1053627   | eQTL | NSUN4           |
| rs11548267  | chr1  | 150238699 | APH1A     | NM_016022    | 1366 | rs11548267  | eQTL | FAM72C          |
| rs11556341  | chr1  | 154245142 | HAX1      | NM_006118    | 104  | rs11556341  | eQTL | HAX1            |
| rs2516839   | chr1  | 161013121 | USF1      | NM_207005    | 140  | rs2516839   | eQTL | USF1            |
| rs2175593   | chr1  | 234529570 | TARBP1    | NM_005646    | 4257 | rs2175593   | eQTL | C1orf31         |
| rs1051677   | chr2  | 217070248 | XRCC5     | NM_021141    | 2662 | rs1051677   | eQTL | 216779200       |
| rs13848     | chr2  | 240946766 | NDUFA10   | NM_004544    | 872  | rs13848     | eQTL | NDUFA10         |
| rs1128416   | chr2  | 29001691  | PPP1CB    | NM_206876    | 361  | rs1128416   | eQTL | FLJ20628        |
| rs1049678   | chr2  | 75882656  | MRPL19    | NM_014763    | 1149 | rs1049678   | eQTL | C2orf3          |
| rs3731828   | chr2  | 85806266  | VAMP8     | NM_003761    | 294  | rs3731828   | eQTL | VAMP8           |
| rs1010      | chr2  | 85808982  | VAMP8     | NM_003761    | 602  | rs1010      | eQTL | VAMP8           |
| rs17851998  | chr2  | 99804642  | MRPL30    | NM_145212    | 252  | rs17851998  | eQTL | LIPT1           |
| rs1052637   | chr2  | 118575215 | DDX18     | NM_006773    | 380  | rs1052637   | eQTL | DDX18           |
| rs4685      | chr2  | 198257795 | SF3B1     | NM_012433    | 3705 | rs4685      | eQTL | COQ10B          |
| rs8539      | chr2  | 198362018 | HSPD1     | NM_002156    | 410  | rs8539      | eQTL | PLCL1           |
| rs3448      | chr3  | 49396751  | RHOA      | NM_001664    | 1749 | rs3448      | eQTL | APEH            |
| rs11542549  | chr3  | 191075902 | CCDC50    | NM_178335    | 818  | rs11542549  | eQTL | CCDC50          |
| rs1705805   | chr3  | 3189279   | TRNT1     | NM_182916    | 1050 | rs1705805   | eQTL | TRNT1           |
| rs7231      | chr3  | 58413465  | PDHB      | NM_000925    | 1419 | rs7231      | eQTL | C21orf66        |
| rs9851180   | chr3  | 122259606 | PARP9     | NM_001146106 | 1804 | rs9851180   | eQTL | LOC131076       |
| rs10856838  | chr4  | 38777173  | TLR10     | NM_030956    | 677  | rs10856838  | eQTL | TLR10           |
| rs11096956  | chr4  | 38776180  | TLR10     | NM_001017388 | 1164 | rs11096956  | eQTL | TLR1            |
| rs16872235  | chr5  | 74037386  | GM2       | NM_032380    | 1202 | rs16872235  | eQTL | TINP1           |
| rs27044     | chr5  | 96118852  | ERAP1     | NM_001040458 | 2535 | rs27044     | eQTL | ERAP1           |
| rs160632    | chr5  | 96503523  | RIOK2     | NM_001159749 | 1155 | rs160632    | eQTL | ENSG00000058729 |
| rs2610767   | chr6  | 89322239  | RNGTT     | NM_003800    | 2213 | rs2610767   | eQTL | RNGTT           |
| rs2073724   | chr6  | 31129707  | TCF19     | NM_007109    | 1492 | rs2073724   | eQTL | HLA-C           |
| rs1046089   | chr6  | 31602967  | PRRC2A    | NM_080686    | 5468 | rs1046089   | eQTL | HLA-DRB5        |
| rs3177928   | chr6  | 32412435  | HLA-DRA   | NM_019111    | 892  | rs3177928   | eQTL | HLA-DRB1        |
| rs7194      | chr6  | 32412480  | HLA-DRA   | NM_019111    | 937  | rs7194      | eQTL | HLA-DRB5        |
| rs7195      | chr6  | 32412539  | HLA-DRA   | NM_019111    | 996  | rs7195      | eQTL | HLA.DRA         |
| rs36217730  | chr6  | 32546818  | HLA-DRB1  | NM_001243965 | 918  | rs36217730  | eQTL | HLA.DRB1        |
| rs1063355   | chr6  | 32627714  | HLA-DQB1  | NM_001243961 | 1191 | rs1063355   | eQTL | HLA.DQB1        |
| rs36205479  | chr6  | 32627807  | HLA-DQB1  | NM_001243961 | 1098 | rs36205479  | eQTL | HLA.DRB1        |
| rs36205476  | chr6  | 32627830  | HLA-DQB1  | NM_001243961 | 1075 | rs36205476  | eQTL | HLA.DQB1        |
| rs1140347   | chr6  | 32628022  | HLA-DQB1  | NM_001243961 | 883  | rs1140347   | eQTL | HLA.DQB1        |
| rs36222414  | chr6  | 32634350  | HLA-DQB1  | NM_001243961 | 117  | rs36222414  | eQTL | HLA.DQB1        |
| rs1047985   | chr6  | 32605216  | HLA-DQA1  | NM_002122    | 34   | rs1047985   | eQTL | HLA.DRB6        |
| rs1047993   | chr6  | 32605271  | HLA-DQA1  | NM_002122    | 89   | rs1047993   | eQTL | HLA.DRB3        |
| rs1130034   | chr6  | 32605274  | HLA-DQA1  | NM_002122    | 92   | rs1130034   | eQTL | HLA.DQB1        |
| rs35882239  | chr6  | 32522576  | HLA-DRB6  | NR_001298    | 631  | rs35882239  | eQTL | HLA.DRB1        |
| rs201493562 | chr6  | 32780724  | HLA-DOB   | NM_002120    | 1188 | rs201493562 | eQTL | HLA-DQA1        |
| rs200187983 | chr6  | 32975257  | HLA-DOA   | NM_002119    | 520  | rs200187983 | eQTL | HLA-DOA         |
| rs1126723   | chr6  | 33054331  | HLA-DPB1  | NM_002121    | 913  | rs1126723   | eQTL | HLA.DPB1        |
| rs9277523   | chr6  | 33054355  | HLA-DPB1  | NM_002121    | 937  | rs9277523   | eQTL | HLA.DPB1        |
| rs8486      | chr6  | 33032968  | HLA-DPA1  | NM_001242524 | 1150 | rs8486      | eQTL | HLA.DPB1        |
| rs62447208  | chr7  | 50470156  | IKZF1     | NM_001220773 | 2997 | rs62447208  | eQTL | IKZF1           |
| rs11980379  | chr7  | 50469981  | IKZF1     | NM_001220772 | 2561 | rs11980379  | eQTL | IKZF1           |
| rs10949955  | chr7  | 64437648  | ZNF117    | NM_015852    | 3586 | rs10949955  | eQTL | ERV3            |
| rs1047998   | chr7  | 102065651 | PRKRIP1   | NM_024653    | 703  | rs1047998   | eQTL | DNAJC2          |
| rs1051764   | chr7  | 150070663 | REPIN1    | NM_014374    | 2406 | rs1051764   | eQTL | RARRES2         |
| rs11772955  | chr7  | 150139639 | LOC285972 | NR_034033    | 179  | rs11772955  | eQTL | ENSG00000171115 |
| rs804292    | chr8  | 11643915  | NEIL2     | NM_001135746 | 1263 | rs804292    | eQTL | CTSB            |
| rs1053088   | chr8  | 66515783  | ARMC1     | NM_018120    | 1950 | rs1053088   | eQTL | ARMC1           |
| rs9792      | chr8  | 142205237 | DENND3    | NM_014957    | 4780 | rs9792      | eQTL | DENND3          |
| rs1053000   | chr10 | 3178881   | PFKP      | NM_002627    | 2541 | rs1053000   | eQTL | PITRM1          |
| rs1053454   | chr10 | 22826093  | PIP4K2A   | NM_005028    | 1506 | rs1053454   | eQTL | PIP5K2A         |
| rs10786229  | chr10 | 97447373  | TCTN3     | NM_015631    | 847  | rs10786229  | eQTL | ENTPD1          |

|            |       |           |           |              |      |            |           |                 |
|------------|-------|-----------|-----------|--------------|------|------------|-----------|-----------------|
| rs6541     | chr11 | 252851    | PSMD13    | NM_175932    | 1630 | rs6541     | eQTL      | LOC653486       |
| rs6591     | chr11 | 840363    | POLR2L    | NM_021128    | 234  | rs6591     | eQTL      | ENSG00000177700 |
| rs6735     | chr11 | 8707233   | RPL27A    | NM_000990    | 693  | rs6735     | eQTL      | RPL27A          |
| rs1061093  | chr11 | 62334908  | EEF1G     | NM_001404    | 761  | rs1061093  | eQTL      | 62091500        |
| rs12808829 | chr11 | 62378660  | EML3      | NM_153265    | 659  | rs12808829 | eQTL      | EEF1G           |
| rs2073800  | chr11 | 65161129  | FRMD8     | NM_031904    | 531  | rs2073800  | eQTL      | CAPN1           |
| rs2245906  | chr12 | 673788    | NINJ2     | NM_016533    | 736  | rs2245906  | eQTL      | KDM5A           |
| rs2753     | chr12 | 49521672  | TUBA1B    | NM_006082    | 1646 | rs2753     | eQTL      | K-ALPHA-1       |
| rs12432539 | chr14 | 35062312  | SNX6      | NM_021249    | 806  | rs12432539 | eQTL      | PPP2R3C         |
| rs8017642  | chr14 | 75590822  | NEK9      | NM_033116    | 478  | rs8017642  | eQTL      | EIF2B2          |
| rs8702     | chr14 | 104152352 | KLC1      | NM_005552    | 2387 | rs8702     | eQTL      | ZFYVE21         |
| rs1048166  | chr15 | 42192040  | EHD4      | NM_139265    | 2492 | rs1048166  | eQTL      | EHD4            |
| rs1036938  | chr15 | 79237247  | CTSH      | NM_004390    | 174  | rs1036938  | eQTL      | CTSH            |
| rs745829   | chr16 | 12663277  | SNX29     | NM_032167    | 3295 | rs745829   | eQTL      | LOC92017        |
| rs246258   | chr16 | 58579274  | CNOT1     | NM_016284    | 4461 | rs246258   | eQTL      | CNOT1           |
| rs9924686  | chr16 | 30003076  | TAOK2     | NM_004783    | 4154 | rs9924686  | eQTL      | TBC1D10B        |
| rs11557674 | chr16 | 57474687  | CIAPIN1   | NM_020313    | 325  | rs11557674 | eQTL      | POLR2C          |
| rs2240243  | chr16 | 72137561  | DHX38     | NM_014003    | 2053 | rs2240243  | eQTL      | DHX38           |
| rs17699859 | chr16 | 87788836  | KLHDC4    | NM_017566    | 435  | rs17699859 | eQTL      | SLC7A5          |
| rs2292954  | chr16 | 89613123  | SPG7      | NM_003119    | 1528 | rs2292954  | eQTL      | RPL13           |
| rs907091   | chr17 | 37921742  | IKZF3     | NM_001257414 | 1491 | rs907091   | eQTL      | GSDML           |
| rs3088040  | chr17 | 76799860  | USP36     | NM_025090    | 2742 | rs3088040  | eQTL      | USP36           |
| rs1054378  | chr17 | 7215536   | EIF5A     | NM_001143760 | 1010 | rs1054378  | eQTL      | EIF5A           |
| rs16942    | chr17 | 41244000  | BRCA1     | NM_007300    | 3780 | rs16942    | eQTL      | TMEM106A        |
| rs11660414 | chr18 | 34376565  | TPGS2     | NM_015476    | 1534 | rs11660414 | eQTL      | C18orf10        |
| rs2278161  | chr18 | 72176083  | CNDP2     | NM_018235    | 635  | rs2278161  | eQTL      | CNDP2           |
| rs12488    | chr19 | 1272040   | CIRBP     | NM_001280    | 641  | rs12488    | eQTL      | C19orf24        |
| rs2304240  | chr19 | 10449392  | ICAM3     | NM_002162    | 364  | rs2304240  | eQTL      | ICAM3           |
| rs17626    | chr19 | 39926521  | RPS16     | NM_001020    | 98   | rs17626    | eQTL      | RPS16           |
| rs735571   | chr19 | 42463447  | RABAC1    | NM_006423    | 82   | rs735571   | eQTL      | ENSG00000105404 |
| rs2293012  | chr19 | 49954807  | PIH1D1    | NM_017916    | 309  | rs2293012  | eQTL      | BCAT2           |
| rs6107027  | chr20 | 25288632  | ABHD12    | NM_015600    | 1116 | rs6107027  | eQTL      | ABHD12          |
| rs235314   | chr21 | 46271452  | PTTG1IP   | NM_004339    | 874  | rs235314   | eQTL      | PTTG1IP         |
| rs763121   | chr22 | 38879940  | DDX17     | NM_001098504 | 4299 | rs763121   | eQTL      | UNC84B          |
| rs86796    | chr22 | 38881454  | DDX17     | NM_001098504 | 2785 | rs86796    | eQTL      | UNC84B          |
| rs1043312  | chr22 | 39131727  | SUN2      | NM_001199579 | 3056 | rs1043312  | eQTL      | UNC84B          |
| rs738535   | chr22 | 43203137  | ARFGAP3   | NM_014570    | 1573 | rs738535   | eQTL      | PACSLN2         |
| rs1043879  | chr1  | 25570081  | C1orf63   | NM_020317    | 968  | rs1043879  | GWAS      | NA              |
| rs9274407  | chr6  | 32632832  | HLA-DQB1  | NM_001243961 | 204  | rs9274407  | GWAS      | NA              |
| rs1136001  | chr16 | 15131974  | NTAN1     | NM_173474    | 852  | rs1136001  | GWAS      | NA              |
| rs3732235  | chr2  | 71631109  | ZNF638    | NM_001252613 | 3262 | rs2257136  | link_eQTL | ZNF638          |
| rs1048135  | chr2  | 152139416 | NMI       | NM_004688    | 377  | rs111730   | link_eQTL | ENSG00000123609 |
| rs3739038  | chr2  | 238672703 | LRRFIP1   | NM_001137553 | 2471 | rs3213868  | link_eQTL | LRRFIP1         |
| rs4778     | chr5  | 112355668 | DCP2      | NM_001242377 | 7869 | rs17372511 | link_eQTL | DCP2            |
| rs1045241  | chr5  | 118729286 | TNFAIP8   | NM_001077654 | 961  | rs3203922  | link_eQTL | NA              |
| rs2233311  | chr5  | 150410219 | TNIP1     | NM_001252386 | 2035 | rs8177834  | link_eQTL | ENSG00000145901 |
| rs4797     | chr5  | 179260213 | SQSTM1    | NM_003900    | 1031 | rs1065154  | link_eQTL | SQSTM1          |
| rs8955     | chr6  | 7288297   | SSR1      | NM_003144    | 2849 | rs1050226  | link_eQTL | SSR1            |
| rs11071    | chr6  | 7288544   | SSR1      | NM_003144    | 2602 | rs1050226  | link_eQTL | SSR1            |
| rs3780103  | chr8  | 17819572  | PCM1      | NM_006197    | 2774 | rs1057016  | link_eQTL | ASAH1           |
| rs1053087  | chr8  | 66515865  | ARMC1     | NM_018120    | 1868 | rs14213    | link_eQTL | ARMC1           |
| rs4148077  | chr14 | 74759477  | ABCD4     | NM_005050    | 1062 | rs2301345  | link_eQTL | ABCD4           |
| rs1048175  | chr15 | 42191909  | EHD4      | NM_139265    | 2623 | rs1048166  | link_eQTL | EHD4            |
| rs1138357  | chr15 | 80263406  | BCL2A1    | NM_001114735 | 238  | rs8026803  | link_eQTL | BCL2A1          |
| rs3803604  | chr16 | 12665244  | SNX29     | NM_032167    | 5262 | rs12927563 | link_eQTL | LOC92017        |
| rs1053739  | chr17 | 43183108  | NMT1      | NM_021079    | 1610 | rs1053733  | link_eQTL | DCAKD           |
| rs610308   | chr19 | 49377319  | PPP1R15A  | NM_014330    | 1098 | rs638050   | link_eQTL | LIG1            |
| rs13815    | chr22 | 43529314  | MCAT      | NM_014507    | 739  | rs2245947  | link_eQTL | ENSG00000100294 |
| rs1052067  | chr1  | 156206121 | PMF1-BGLA | NM_001199664 | 232  | rs1052067  | eQTL      | C1orf85         |
| rs2774279  | chr1  | 161017556 | ARHGAP30  | NM_001025598 | 3601 | rs2774279  | eQTL      | USF1            |
| rs2241801  | chr2  | 105924510 | TGFBRAP1  | NM_001142621 | 330  | rs2241801  | eQTL      | TGFBRAP1        |
| rs3739123  | chr2  | 131131424 | PTPN18    | NM_014369    | 2111 | rs3739123  | eQTL      | IMP4            |
| rs11797    | chr3  | 48508585  | TREX1     | NM_016381    | 1357 | rs11797    | eQTL      | PLXNB1          |

|            |       |           |          |              |      |            |           |                 |
|------------|-------|-----------|----------|--------------|------|------------|-----------|-----------------|
| rs1063603  | chr3  | 88101551  | CGGBP1   | NM_003663    | 3986 | rs1063603  | eQTL      | CGGBP1          |
| rs13403    | chr3  | 160152299 | SMC4     | NM_005496    | 4837 | rs13403    | eQTL      | ENSG00000113810 |
| rs8488     | chr5  | 102538752 | PPIP5K2  | NM_015216    | 5123 | rs8488     | eQTL      | PAM             |
| rs2270812  | chr5  | 157164962 | THG1L    | NM_017872    | 821  | rs2270812  | eQTL      | ICF45           |
| rs9460113  | chr6  | 170627651 | FAM120B  | NM_032448    | 1281 | rs9460113  | eQTL      | FAM120B         |
| rs3132453  | chr6  | 31604044  | PRRC2A   | NM_080686    | 5932 | rs3132453  | eQTL      | HLA-C           |
| rs3135391  | chr6  | 32410987  | HLA-DRA  | NM_019111    | 463  | rs3135391  | eQTL      | HLA.DRB5        |
| rs36205180 | chr6  | 32627882  | HLA-DQB1 | NM_001243961 | 1023 | rs36205180 | eQTL      | HLA.DRB1        |
| rs1042502  | chr6  | 33054400  | HLA-DPB1 | NM_002121    | 982  | rs1042502  | eQTL      | HLA.DPB1        |
| rs1042908  | chr6  | 33032861  | HLA-DPA1 | NM_001242524 | 1257 | rs1042908  | eQTL      | HLA.DPB1        |
| rs1042901  | chr6  | 33032865  | HLA-DPA1 | NM_001242524 | 1253 | rs1042901  | eQTL      | HLA.DPB1        |
| rs1126769  | chr6  | 33036435  | HLA-DPA1 | NM_001242524 | 973  | rs1126769  | eQTL      | HLA.DPB1        |
| rs1042434  | chr6  | 33036505  | HLA-DPA1 | NM_001242524 | 903  | rs1042434  | eQTL      | HLA.DPB1        |
| rs1042308  | chr6  | 33036853  | HLA-DPA1 | NM_001242524 | 769  | rs1042308  | eQTL      | HLA.DPB1        |
| rs1059288  | chr6  | 33267672  | TAPBP    | NM_172209    | 3297 | rs1059288  | eQTL      | TAPBP           |
| rs463260   | chr6  | 33256984  | WDR46    | NM_001164267 | 321  | rs463260   | eQTL      | TAPBP           |
| rs1130635  | chr9  | 139317869 | PMPCA    | NM_015160    | 1736 | rs1130635  | eQTL      | SDCCAG3         |
| rs1935815  | chr10 | 97631492  | ENTPD1   | NM_001164179 | 7086 | rs1935815  | eQTL      | ENTPD1          |
| rs2863095  | chr10 | 102746503 | MRPL43   | NM_032112    | 540  | rs2863095  | eQTL      | SEMA4G          |
| rs360136   | chr11 | 9773517   | SWAP70   | NM_015055    | 3857 | rs360136   | eQTL      | SWAP70          |
| rs17702    | chr11 | 61213920  | SDHAF2   | NM_017841    | 900  | rs17702    | eQTL      | CPSF7           |
| rs4930427  | chr11 | 67200819  | RPS6KB2  | NM_003952    | 889  | rs4930427  | eQTL      | RPS6KB2         |
| rs1064951  | chr12 | 121878659 | KDM2B    | NM_001005366 | 3770 | rs1064951  | eQTL      | VPS33A          |
| rs1055472  | chr12 | 125510104 | BRI3BP   | NM_080626    | 1027 | rs1055472  | eQTL      | BRI3BP          |
| rs8786     | chr14 | 23240328  | OXA1L    | NM_005015    | 1221 | rs8786     | eQTL      | ENSG00000155463 |
| rs3825584  | chr14 | 24587639  | DCAF11   | NM_001163484 | 900  | rs3825584  | eQTL      | C14orf122       |
| rs7012     | chr14 | 102814945 | CINP     | NM_001177611 | 722  | rs7012     | eQTL      | C14orf131       |
| rs7011     | chr14 | 102815042 | CINP     | NM_001177611 | 625  | rs7011     | eQTL      | C14orf131       |
| rs17802279 | chr15 | 65108504  | PIF1     | NM_025049    | 1985 | rs17802279 | eQTL      | ANKDD1A         |
| rs7220988  | chr17 | 44109474  | KANSL1   | NM_015443    | 3202 | rs7220988  | eQTL      | FALZ            |
| rs2230326  | chr17 | 40280291  | RAB5C    | NM_001252039 | 885  | rs2230326  | eQTL      | LGP2            |
| rs3764509  | chr18 | 72167124  | CNDP2    | NM_018235    | 175  | rs3764509  | eQTL      | 70318100        |
| rs7000     | chr20 | 62522466  | TPD52L2  | NM_001243891 | 1852 | rs7000     | eQTL      | TPD52L2         |
| rs737953   | chr22 | 30987861  | PES1     | NM_001243225 | 67   | rs737953   | eQTL      | ENSG00000100029 |
| rs5498     | chr19 | 10395683  | ICAM1    | NM_000201    | 1724 | rs5498     | GWAS      | NA              |
| rs1130319  | chr2  | 3502055   | ADI1     | NM_018269    | 1311 | rs1130333  | link_eQTL | ADI1            |
| rs4129009  | chr4  | 38774889  | TLR10    | NM_030956    | 2961 | rs4274855  | link_eQTL | TLR1            |
| rs1059110  | chr5  | 138266546 | CTNNA1   | NM_001903    | 2315 | rs17031    | link_eQTL | CTNNA1          |
| rs2073722  | chr6  | 31129642  | TCF19    | NM_007109    | 1427 | rs2073721  | link_eQTL | HLA-C           |
| rs2303772  | chr16 | 87795580  | KLHDC4   | NM_017566    | 268  | rs17699859 | link_eQTL | SLC7A5          |
| rs20559    | chr1  | 183099560 | LAMC1    | NM_002293    | 3619 | rs20559    | eQTL      | LAMC1           |
| rs2230659  | chr1  | 46078884  | NASP     | NM_001195193 | 1437 | rs2230659  | eQTL      | IPP             |
| rs1799821  | chr1  | 53676448  | CPT2     | NM_000098    | 1617 | rs1799821  | eQTL      | C1orf123        |
| rs1127311  | chr1  | 154556663 | ADAR     | NM_015841    | 4407 | rs1127311  | eQTL      | UBAP2L          |
| rs518721   | chr1  | 160723517 | SLAMF7   | NM_021181    | 1573 | rs518721   | eQTL      | SLAMF7          |
| rs15129    | chr2  | 242168976 | HDLBP    | NM_005336    | 4080 | rs15129    | eQTL      | STK25           |
| rs2304545  | chr2  | 209212707 | PIKFYVE  | NM_015040    | 5492 | rs2304545  | eQTL      | PIKFYVE         |
| rs17350005 | chr2  | 3504687   | ADI1     | NM_018269    | 410  | rs17350005 | eQTL      | ENSG00000182551 |
| rs8207     | chr2  | 170493863 | PPIG     | NM_004792    | 2315 | rs8207     | eQTL      | PPIG            |
| rs10272    | chr3  | 150260853 | SERP1    | NM_014445    | 2099 | rs10272    | eQTL      | SELT            |
| rs778593   | chr5  | 140027216 | NDUFA2   | NM_002488    | 155  | rs778593   | eQTL      | WDR55           |
| rs9606     | chr6  | 5109592   | LYRM4    | NM_001164841 | 672  | rs9606     | eQTL      | LYRM4           |
| rs1419881  | chr6  | 31130593  | TCF19    | NM_007109    | 1907 | rs1419881  | eQTL      | TCF19           |
| rs11229    | chr6  | 31603770  | PRRC2A   | NM_080686    | 5817 | rs11229    | eQTL      | MICA            |
| rs1049219  | chr6  | 32627763  | HLA-DQB1 | NM_001243961 | 1142 | rs1049219  | eQTL      | HLA.DRB1        |
| rs75643968 | chr6  | 32629802  | HLA-DQB1 | NM_001243961 | 685  | rs75643968 | eQTL      | HLA.DQB1        |
| rs1071630  | chr6  | 32609126  | HLA-DQA1 | NM_002122    | 175  | rs1071630  | eQTL      | HLA.DQB1        |
| rs1142323  | chr6  | 32609192  | HLA-DQA1 | NM_002122    | 241  | rs1142323  | eQTL      | HLA.DRB3        |
| rs1142324  | chr6  | 32609207  | HLA-DQA1 | NM_002122    | 256  | rs1142324  | eQTL      | HLA.DQB1        |
| rs1130158  | chr6  | 32610972  | HLA-DQA1 | NM_002122    | 1085 | rs1130158  | eQTL      | HLA.DQB1        |
| rs1042187  | chr6  | 33052768  | HLA-DPB1 | NM_002121    | 522  | rs1042187  | eQTL      | HLA.DPB1        |
| rs754555   | chr7  | 24758753  | DFNA5    | NM_004403    | 822  | rs754555   | eQTL      | DFNA5           |
| rs1044141  | chr7  | 43664280  | STK17A   | NM_004760    | 1235 | rs1044141  | eQTL      | C7orf44         |

|            |       |           |            |                   |      |            |           |                 |
|------------|-------|-----------|------------|-------------------|------|------------|-----------|-----------------|
| rs1044039  | chr7  | 43678997  | COA1       | NM_018224         | 776  | rs1044039  | eQTL      | C7orf44         |
| rs13008    | chr7  | 97922875  | BAIAP2L1   | NM_018842         | 1757 | rs13008    | eQTL      | DKFZP434B0335   |
| rs11999525 | chr9  | 139371342 | SEC16A     | NM_014866         | 1035 | rs11999525 | eQTL      | INPP5E          |
| rs8341     | chr10 | 22825133  | PIP4K2A    | NM_005028         | 2466 | rs8341     | eQTL      | PIP5K2A         |
| rs917634   | chr12 | 6631169   | NCAPD2     | NM_014865         | 1966 | rs917634   | eQTL      | NCAPD2          |
| rs1131476  | chr12 | 113357209 | OAS1       | NM_016816         | 1160 | rs1131476  | eQTL      | OAS1            |
| rs2230342  | chr13 | 99948178  | GPR183     | NM_004951         | 396  | rs2230342  | eQTL      | ENSG00000169508 |
| rs3742771  | chr14 | 75599647  | TMED10     | NM_006827         | 2668 | rs3742771  | eQTL      | EIF2B2          |
| rs34758599 | chr15 | 64706332  | TRIP4      | NM_016213         | 1152 | rs34758599 | eQTL      | PIF1            |
| rs17223484 | chr16 | 12663424  | SNX29      | NM_032167         | 3442 | rs17223484 | eQTL      | LOC92017        |
| rs12149722 | chr16 | 2049849   | ZNF598     | NM_178167         | 1716 | rs12149722 | eQTL      | SYNGR3          |
| rs35586    | chr16 | 23677006  | DCTN5      | NM_032486         | 585  | rs35586    | eQTL      | DCTN5           |
| rs12051648 | chr17 | 27009749  | SUPT6H     | NM_003170         | 1692 | rs12051648 | eQTL      | ERAL1           |
| rs9207     | chr17 | 61823899  | CCDC47     | NM_020198         | 2130 | rs9207     | eQTL      | FTSJ3           |
| rs2584625  | chr17 | 61903445  | FTSJ3      | NM_017647         | 917  | rs2584625  | eQTL      | FTSJ3           |
| rs880090   | chr19 | 19740729  | GMIP       | NM_016573         | 3073 | rs880090   | eQTL      | EDG4            |
| rs13394    | chr19 | 49950298  | PIH1D1     | NM_017916         | 954  | rs13394    | eQTL      | BCAT2           |
| rs20552    | chr22 | 41551039  | EP300      | NM_001429         | 3578 | rs20552    | eQTL      | L3MBTL2         |
| rs11541855 | chr17 | 7217463   | RP11-542C1 | ENST00000575474.1 | 1825 | rs11541855 | eQTL      | EIF5AL1         |
| rs1133503  | chr6  | 96054588  | MANEA      | NM_024641         | 1876 | rs7755854  | link_eQTL | 96132000        |
| rs7853346  | chr9  | 33676094  | PTENP1     | NR_023917         | 1325 | rs7849845  | link_eQTL | DCTN3           |
| rs913275   | chr9  | 131910644 | PPP2R4     | NM_021131         | 2086 | rs4713     | link_eQTL | CRAT            |
| rs3826007  | chr15 | 80263217  | BCL2A1     | NM_001114735      | 427  | rs8026803  | link_eQTL | BCL2A1          |
| rs4890009  | chr17 | 78311508  | RNF213     | NM_001256071      | 4800 | rs8082521  | link_eQTL | C17orf27        |
| rs1566286  | chr17 | 71238433  | C17orf80   | NM_017941         | 1758 | rs745143   | link_eQTL | COG1            |



**Supplementary Table 5. List of diseases and phenotypes associated with RiboSNitches**

| No | FDR   | Gene     | Transcript   | SNPID      | Associated SNPID | Phenotype                                               |
|----|-------|----------|--------------|------------|------------------|---------------------------------------------------------|
| 1  | 0.000 | SGSM2    | NM_014853    | rs2248821  | rs4790333        | Fasting proinsulin levels                               |
| 2  | 0.000 | ZC3H4    | NM_015168    | rs7250850  | rs3810291        | Body mass index                                         |
| 3  | 0.000 | TARBP1   | NM_005646    | rs4920246  | rs10489896       | Cognitive test performance                              |
| 4  | 0.000 | THUMPD2  | NR_028102    | rs8265     | rs2540226        | Personality dimensions                                  |
| 5  | 0.000 | PNPT1    | NM_033109    | rs2627765  | rs782590         | Metabolic syndrome                                      |
| 6  | 0.000 | ZNF668   | NM_001172670 | rs2303223  | rs9923231        | Warfarin responsiveness for Japanese                    |
| 7  | 0.000 | SAMM50   | NM_015380    | rs3761472  | rs12483959       | Metabolite levels in Koreans                            |
| 8  | 0.007 | IFI30    | NM_006332    | rs11554159 | rs874628         | Multiple sclerosis                                      |
| 9  | 0.017 | SUZ12    | NM_015355    | rs537166   | rs17780086       | Height                                                  |
| 10 | 0.026 | IL2RB    | NM_000878    | rs228953   | rs2284033        | Asthma                                                  |
| 11 | 0.029 | GAK      | NM_005255    | rs2279181  | rs11248060       | Parkinson's disease                                     |
| 12 | 0.036 | IRF4     | NM_001195286 | rs9391997  | rs872071         | Chronic lymphocytic leukemia                            |
| 13 | 0.040 | HNRNPK   | NM_031262    | rs296888   | rs7853377        | Height                                                  |
| 14 | 0.042 | IRF4     | NM_001195286 | rs1050976  | rs872071         | Chronic lymphocytic leukemia                            |
| 15 | 0.043 | SYK      | NM_001135052 | rs2306042  | rs10993738       | Type 2 diabetes in Japanese populations                 |
| 16 | 0.049 | TRAF1    | NM_005658    | rs9886724  | rs3761847        | Rheumatoid arthritis                                    |
| 17 | 0.068 | CD53     | NM_001040033 | rs1494324  | rs2885805        | Cytomegalovirus antibody response                       |
| 18 | 0.071 | SLC25A11 | NM_003562    | rs1060431  | rs6065           | Platelet counts                                         |
| 19 | 0.074 | PLEK     | NM_002664    | rs3816281  | rs17035378       | Celiac disease                                          |
| 20 | 0.079 | MPHOSP9  | NM_022782    | rs1051431  | rs7980687        | Head circumference (infant)                             |
| 21 | 0.096 | TCF19    | NM_007109    | rs2073722  | rs3130501        | Stevens-Johnson syndrome and toxic epidermal necrolysis |
| 22 | 0.096 | DHCR7    | NM_001163817 | rs1044482  | rs12785878       | Vitamin D insufficiency                                 |

## Supplementary Table 6

## Description of genomic features

| No. | Genomic Feature         | Type   | Description / source                                                                                                                                                        |
|-----|-------------------------|--------|-----------------------------------------------------------------------------------------------------------------------------------------------------------------------------|
| 1   | GC-50-Low               | Binary | GC% < 0.3 in the flanking 50bp of the SNP                                                                                                                                   |
| 2   | GC-50-MedLow            | Binary | 0.3 < GC% < 0.5 in the flanking 50bp of the SNP                                                                                                                             |
| 3   | GC-50-MedHigh           | Binary | 0.5 < GC% < 0.7 in the flanking 50bp of the SNP                                                                                                                             |
| 4   | GC-50-High              | Binary | GC% > 0.7 in the flanking 50bp of the SNP                                                                                                                                   |
| 5   | GC-100-Low              | Binary | GC% < 0.3 in the flanking 100bp of the SNP                                                                                                                                  |
| 6   | GC-100-MedLow           | Binary | 0.3 < GC% < 0.5 in the flanking 100bp of the SNP                                                                                                                            |
| 7   | GC-100-MedHigh          | Binary | 0.5 < GC% < 0.7 in the flanking 100bp of the SNP                                                                                                                            |
| 8   | GC-100-High             | Binary | GC% > 0.7 in the flanking 100bp of the SNP                                                                                                                                  |
| 9   | Histone-H3K4me1         | Cont.  | Different Histone markers, taken from <a href="http://dir.nhlbi.nih.gov/papers/lmi/epigenomes/hgtcell.aspx">http://dir.nhlbi.nih.gov/papers/lmi/epigenomes/hgtcell.aspx</a> |
| 10  | Histone-H3K4me2         | Cont.  | Different Histone markers, taken from <a href="http://dir.nhlbi.nih.gov/papers/lmi/epigenomes/hgtcell.aspx">http://dir.nhlbi.nih.gov/papers/lmi/epigenomes/hgtcell.aspx</a> |
| 11  | Histone-H3K4me3         | Cont.  | Different Histone markers, taken from <a href="http://dir.nhlbi.nih.gov/papers/lmi/epigenomes/hgtcell.aspx">http://dir.nhlbi.nih.gov/papers/lmi/epigenomes/hgtcell.aspx</a> |
| 12  | Histone-H3K9me1         | Cont.  | Different Histone markers, taken from <a href="http://dir.nhlbi.nih.gov/papers/lmi/epigenomes/hgtcell.aspx">http://dir.nhlbi.nih.gov/papers/lmi/epigenomes/hgtcell.aspx</a> |
| 13  | Histone-H3K9me2         | Cont.  | Different Histone markers, taken from <a href="http://dir.nhlbi.nih.gov/papers/lmi/epigenomes/hgtcell.aspx">http://dir.nhlbi.nih.gov/papers/lmi/epigenomes/hgtcell.aspx</a> |
| 14  | Histone-H3K9me3         | Cont.  | Different Histone markers, taken from <a href="http://dir.nhlbi.nih.gov/papers/lmi/epigenomes/hgtcell.aspx">http://dir.nhlbi.nih.gov/papers/lmi/epigenomes/hgtcell.aspx</a> |
| 15  | Histone-H3K27me1        | Cont.  | Different Histone markers, taken from <a href="http://dir.nhlbi.nih.gov/papers/lmi/epigenomes/hgtcell.aspx">http://dir.nhlbi.nih.gov/papers/lmi/epigenomes/hgtcell.aspx</a> |
| 16  | Histone-H3K27me2        | Cont.  | Different Histone markers, taken from <a href="http://dir.nhlbi.nih.gov/papers/lmi/epigenomes/hgtcell.aspx">http://dir.nhlbi.nih.gov/papers/lmi/epigenomes/hgtcell.aspx</a> |
| 17  | Histone-H3K27me3        | Cont.  | Different Histone markers, taken from <a href="http://dir.nhlbi.nih.gov/papers/lmi/epigenomes/hgtcell.aspx">http://dir.nhlbi.nih.gov/papers/lmi/epigenomes/hgtcell.aspx</a> |
| 18  | Histone-H3K36me1        | Cont.  | Different Histone markers, taken from <a href="http://dir.nhlbi.nih.gov/papers/lmi/epigenomes/hgtcell.aspx">http://dir.nhlbi.nih.gov/papers/lmi/epigenomes/hgtcell.aspx</a> |
| 19  | Histone-H3K36me3        | Cont.  | Different Histone markers, taken from <a href="http://dir.nhlbi.nih.gov/papers/lmi/epigenomes/hgtcell.aspx">http://dir.nhlbi.nih.gov/papers/lmi/epigenomes/hgtcell.aspx</a> |
| 20  | Histone-H3K79me1        | Cont.  | Different Histone markers, taken from <a href="http://dir.nhlbi.nih.gov/papers/lmi/epigenomes/hgtcell.aspx">http://dir.nhlbi.nih.gov/papers/lmi/epigenomes/hgtcell.aspx</a> |
| 21  | Histone-H3K79me2        | Cont.  | Different Histone markers, taken from <a href="http://dir.nhlbi.nih.gov/papers/lmi/epigenomes/hgtcell.aspx">http://dir.nhlbi.nih.gov/papers/lmi/epigenomes/hgtcell.aspx</a> |
| 22  | Histone-H3K79me3        | Cont.  | Different Histone markers, taken from <a href="http://dir.nhlbi.nih.gov/papers/lmi/epigenomes/hgtcell.aspx">http://dir.nhlbi.nih.gov/papers/lmi/epigenomes/hgtcell.aspx</a> |
| 23  | Histone-H3R2me1         | Cont.  | Different Histone markers, taken from <a href="http://dir.nhlbi.nih.gov/papers/lmi/epigenomes/hgtcell.aspx">http://dir.nhlbi.nih.gov/papers/lmi/epigenomes/hgtcell.aspx</a> |
| 24  | Histone-H3R2me2         | Cont.  | Different Histone markers, taken from <a href="http://dir.nhlbi.nih.gov/papers/lmi/epigenomes/hgtcell.aspx">http://dir.nhlbi.nih.gov/papers/lmi/epigenomes/hgtcell.aspx</a> |
| 25  | Histone-H4K20me1        | Cont.  | Different Histone markers, taken from <a href="http://dir.nhlbi.nih.gov/papers/lmi/epigenomes/hgtcell.aspx">http://dir.nhlbi.nih.gov/papers/lmi/epigenomes/hgtcell.aspx</a> |
| 26  | Histone-H4K20me3        | Cont.  | Different Histone markers, taken from <a href="http://dir.nhlbi.nih.gov/papers/lmi/epigenomes/hgtcell.aspx">http://dir.nhlbi.nih.gov/papers/lmi/epigenomes/hgtcell.aspx</a> |
| 27  | Histone-H4R3me2         | Cont.  | Different Histone markers, taken from <a href="http://dir.nhlbi.nih.gov/papers/lmi/epigenomes/hgtcell.aspx">http://dir.nhlbi.nih.gov/papers/lmi/epigenomes/hgtcell.aspx</a> |
| 28  | Histone-H2BK5me1        | Cont.  | Different Histone markers, taken from <a href="http://dir.nhlbi.nih.gov/papers/lmi/epigenomes/hgtcell.aspx">http://dir.nhlbi.nih.gov/papers/lmi/epigenomes/hgtcell.aspx</a> |
| 29  | Histone-H2AZ            | Cont.  | Different Histone markers, taken from <a href="http://dir.nhlbi.nih.gov/papers/lmi/epigenomes/hgtcell.aspx">http://dir.nhlbi.nih.gov/papers/lmi/epigenomes/hgtcell.aspx</a> |
| 30  | PoII                    | Cont.  | Different Histone markers, taken from <a href="http://dir.nhlbi.nih.gov/papers/lmi/epigenomes/hgtcell.aspx">http://dir.nhlbi.nih.gov/papers/lmi/epigenomes/hgtcell.aspx</a> |
| 31  | CTCF                    | Cont.  | Different Histone markers, taken from <a href="http://dir.nhlbi.nih.gov/papers/lmi/epigenomes/hgtcell.aspx">http://dir.nhlbi.nih.gov/papers/lmi/epigenomes/hgtcell.aspx</a> |
| 32  | HistoneAcetyl-H2AK5ac   | Cont.  | Different Histone markers, taken from <a href="http://dir.nhlbi.nih.gov/papers/lmi/epigenomes/hgtcell.aspx">http://dir.nhlbi.nih.gov/papers/lmi/epigenomes/hgtcell.aspx</a> |
| 33  | HistoneAcetyl-H2AK9ac   | Cont.  | Different Histone markers, taken from <a href="http://dir.nhlbi.nih.gov/papers/lmi/epigenomes/hgtcell.aspx">http://dir.nhlbi.nih.gov/papers/lmi/epigenomes/hgtcell.aspx</a> |
| 34  | HistoneAcetyl-H2BK120ac | Cont.  | Different Histone markers, taken from <a href="http://dir.nhlbi.nih.gov/papers/lmi/epigenomes/hgtcell.aspx">http://dir.nhlbi.nih.gov/papers/lmi/epigenomes/hgtcell.aspx</a> |
| 35  | HistoneAcetyl-H2BK12ac  | Cont.  | Different Histone markers, taken from <a href="http://dir.nhlbi.nih.gov/papers/lmi/epigenomes/hgtcell.aspx">http://dir.nhlbi.nih.gov/papers/lmi/epigenomes/hgtcell.aspx</a> |
| 36  | HistoneAcetyl-H2BK20ac  | Cont.  | Different Histone markers, taken from <a href="http://dir.nhlbi.nih.gov/papers/lmi/epigenomes/hgtcell.aspx">http://dir.nhlbi.nih.gov/papers/lmi/epigenomes/hgtcell.aspx</a> |
| 37  | HistoneAcetyl-H2BK5ac   | Cont.  | Different Histone markers, taken from <a href="http://dir.nhlbi.nih.gov/papers/lmi/epigenomes/hgtcell.aspx">http://dir.nhlbi.nih.gov/papers/lmi/epigenomes/hgtcell.aspx</a> |
| 38  | HistoneAcetyl-H3K14ac   | Cont.  | Different Histone markers, taken from <a href="http://dir.nhlbi.nih.gov/papers/lmi/epigenomes/hgtcell.aspx">http://dir.nhlbi.nih.gov/papers/lmi/epigenomes/hgtcell.aspx</a> |
| 39  | HistoneAcetyl-H3K18ac   | Cont.  | Different Histone markers, taken from <a href="http://dir.nhlbi.nih.gov/papers/lmi/epigenomes/hgtcell.aspx">http://dir.nhlbi.nih.gov/papers/lmi/epigenomes/hgtcell.aspx</a> |
| 40  | HistoneAcetyl-H3K23ac   | Cont.  | Different Histone markers, taken from <a href="http://dir.nhlbi.nih.gov/papers/lmi/epigenomes/hgtcell.aspx">http://dir.nhlbi.nih.gov/papers/lmi/epigenomes/hgtcell.aspx</a> |
| 41  | HistoneAcetyl-H3K27ac   | Cont.  | Different Histone markers, taken from <a href="http://dir.nhlbi.nih.gov/papers/lmi/epigenomes/hgtcell.aspx">http://dir.nhlbi.nih.gov/papers/lmi/epigenomes/hgtcell.aspx</a> |
| 42  | HistoneAcetyl-H3K36ac   | Cont.  | Different Histone markers, taken from <a href="http://dir.nhlbi.nih.gov/papers/lmi/epigenomes/hgtcell.aspx">http://dir.nhlbi.nih.gov/papers/lmi/epigenomes/hgtcell.aspx</a> |
| 43  | HistoneAcetyl-H3K4ac    | Cont.  | Different Histone markers, taken from <a href="http://dir.nhlbi.nih.gov/papers/lmi/epigenomes/hgtcell.aspx">http://dir.nhlbi.nih.gov/papers/lmi/epigenomes/hgtcell.aspx</a> |
| 44  | HistoneAcetyl-H3K9ac    | Cont.  | Different Histone markers, taken from <a href="http://dir.nhlbi.nih.gov/papers/lmi/epigenomes/hgtcell.aspx">http://dir.nhlbi.nih.gov/papers/lmi/epigenomes/hgtcell.aspx</a> |
| 45  | HistoneAcetyl-H4K12ac   | Cont.  | Different Histone markers, taken from <a href="http://dir.nhlbi.nih.gov/papers/lmi/epigenomes/hgtcell.aspx">http://dir.nhlbi.nih.gov/papers/lmi/epigenomes/hgtcell.aspx</a> |
| 46  | HistoneAcetyl-H4K16ac   | Cont.  | Different Histone markers, taken from <a href="http://dir.nhlbi.nih.gov/papers/lmi/epigenomes/hgtcell.aspx">http://dir.nhlbi.nih.gov/papers/lmi/epigenomes/hgtcell.aspx</a> |
| 47  | HistoneAcetyl-H4K5ac    | Cont.  | Different Histone markers, taken from <a href="http://dir.nhlbi.nih.gov/papers/lmi/epigenomes/hgtcell.aspx">http://dir.nhlbi.nih.gov/papers/lmi/epigenomes/hgtcell.aspx</a> |
| 48  | HistoneAcetyl-H4K8ac    | Cont.  | Different Histone markers, taken from <a href="http://dir.nhlbi.nih.gov/papers/lmi/epigenomes/hgtcell.aspx">http://dir.nhlbi.nih.gov/papers/lmi/epigenomes/hgtcell.aspx</a> |
| 49  | HistoneAcetyl-H4K91ac   | Cont.  | Different Histone markers, taken from <a href="http://dir.nhlbi.nih.gov/papers/lmi/epigenomes/hgtcell.aspx">http://dir.nhlbi.nih.gov/papers/lmi/epigenomes/hgtcell.aspx</a> |
| 50  | 1_Active_Promoter       | Binary | Encode track from the paper by Ernst and Kellis: doi:10.1038/nbt.1662                                                                                                       |
| 51  | 2_Weak_Promoter         | Binary | Encode track from the paper by Ernst and Kellis: doi:10.1038/nbt.1662                                                                                                       |
| 52  | 3_Poised_Promoter       | Binary | Encode track from the paper by Ernst and Kellis: doi:10.1038/nbt.1662                                                                                                       |
| 53  | 4_Strong_Enhancer       | Binary | Encode track from the paper by Ernst and Kellis: doi:10.1038/nbt.1662                                                                                                       |
| 54  | 5_Strong_Enhancer       | Binary | Encode track from the paper by Ernst and Kellis: doi:10.1038/nbt.1662                                                                                                       |
| 55  | 6_Weak_Enhancer         | Binary | Encode track from the paper by Ernst and Kellis: doi:10.1038/nbt.1662                                                                                                       |
| 56  | 7_Weak_Enhancer         | Binary | Encode track from the paper by Ernst and Kellis: doi:10.1038/nbt.1662                                                                                                       |
| 57  | 8_Insulator             | Binary | Encode track from the paper by Ernst and Kellis: doi:10.1038/nbt.1662                                                                                                       |
| 58  | 9_Txn_Transition        | Binary | Encode track from the paper by Ernst and Kellis: doi:10.1038/nbt.1662                                                                                                       |
| 59  | 10_Txn_Elongation       | Binary | Encode track from the paper by Ernst and Kellis: doi:10.1038/nbt.1662                                                                                                       |

|    |                       |        |                                                                                                                                                                                                    |
|----|-----------------------|--------|----------------------------------------------------------------------------------------------------------------------------------------------------------------------------------------------------|
| 60 | 11_Weak_Txn           | Binary | Encode track from the paper by Ernst and Kellis: doi:10.1038/nbt.1662                                                                                                                              |
| 61 | 12_Repressed          | Binary | Encode track from the paper by Ernst and Kellis: doi:10.1038/nbt.1662                                                                                                                              |
| 62 | 13_Heterochrom_Lo     | Binary | Encode track from the paper by Ernst and Kellis: doi:10.1038/nbt.1662                                                                                                                              |
| 63 | 14_Repetitive_CNV     | Binary | Encode track from the paper by Ernst and Kellis: doi:10.1038/nbt.1662                                                                                                                              |
| 64 | 15_Repetitive_CNV     | Binary | Encode track from the paper by Ernst and Kellis: doi:10.1038/nbt.1662                                                                                                                              |
| 65 | CONS-1-Low            | Binary | UCSC conservation track, conservation < 0.1                                                                                                                                                        |
| 66 | CONS-1-MedLow         | Binary | UCSC conservation track, 0.1 < conservation < 0.3                                                                                                                                                  |
| 67 | CONS-1-MedHigh        | Binary | UCSC conservation track, 0.3 < conservation < 0.6                                                                                                                                                  |
| 68 | CONS-1-High           | Binary | UCSC conservation track, conservation > 0.6                                                                                                                                                        |
| 69 | CONS-10-Low           | Binary | UCSC conservation track, average conservation in 10 flanking bp < 0.1                                                                                                                              |
| 70 | CONS-10-MedLow        | Binary | UCSC conservation track, 0.1 < average conservation in 10 flanking bp < 0.3                                                                                                                        |
| 71 | CONS-10-MedHigh       | Binary | UCSC conservation track, 0.3 < average conservation in 10 flanking bp < 0.6                                                                                                                        |
| 72 | CONS-10-High          | Binary | UCSC conservation track, average conservation in 10 flanking bp > 0.6                                                                                                                              |
| 73 | MIRNA_TS              | Binary | SNP located in microRNA target site by TargetScan prediction ( <a href="http://www.targetscan.org/">http://www.targetscan.org/</a> )                                                               |
| 74 | MIRNA_PITA            | Binary | SNP located in microRNA target site by PITA prediction ( <a href="http://genie.weizmann.ac.il/pubs/mir07/mir07_prediction.html">http://genie.weizmann.ac.il/pubs/mir07/mir07_prediction.html</a> ) |
| 75 | CPG                   | Binary | UCSC CpG Island track                                                                                                                                                                              |
| 76 | CHROMATIN_AVG         | Cont.  | Average nucleosome occupancy predicted using model ( <a href="http://genie.weizmann.ac.il/software/nucleo_prediction.html">http://genie.weizmann.ac.il/software/nucleo_prediction.html</a> )       |
| 77 | REG_POTEN             | Cont.  | UCSC regulatory potential track                                                                                                                                                                    |
| 78 | ENCODE_TFBS_CLUSTERED | Binary | Encode track for Clustered transcription factor binding sites                                                                                                                                      |
| 79 | TFBS_CENT             | Binary | transcription factor binding sites from <a href="http://centipede.uchicago.edu/">http://centipede.uchicago.edu/</a>                                                                                |
| 80 | MethylSeq_Gm12878     | Binary | Methylation status, taken from ENCODE, Hudson Alpha GM12878/91/92                                                                                                                                  |
| 81 | MethylSeq_Gm12891     | Binary | Methylation status, taken from ENCODE, Hudson Alpha GM12878/91/92                                                                                                                                  |
| 82 | MethylSeq_Gm12892     | Binary | Methylation status, taken from ENCODE, Hudson Alpha GM12878/91/92                                                                                                                                  |
| 83 | ChipSeq_Ctcf          | Cont.  | Broad ChipSeq, taken from ENCODE                                                                                                                                                                   |
| 84 | ChipSeq_H3k27ac       | Cont.  | Broad ChipSeq, taken from ENCODE                                                                                                                                                                   |
| 85 | ChipSeq_H3k27me3      | Cont.  | Broad ChipSeq, taken from ENCODE                                                                                                                                                                   |
| 86 | ChipSeq_H3k36me3      | Cont.  | Broad ChipSeq, taken from ENCODE                                                                                                                                                                   |
| 87 | ChipSeq_H3k4me1       | Cont.  | Broad ChipSeq, taken from ENCODE                                                                                                                                                                   |
| 88 | ChipSeq_H3k4me2       | Cont.  | Broad ChipSeq, taken from ENCODE                                                                                                                                                                   |
| 89 | ChipSeq_H3k4me3       | Cont.  | Broad ChipSeq, taken from ENCODE                                                                                                                                                                   |
| 90 | ChipSeq_H3k9ac        | Cont.  | Broad ChipSeq, taken from ENCODE                                                                                                                                                                   |
| 91 | ChipSeq_H4k20me1      | Cont.  | Broad ChipSeq, taken from ENCODE                                                                                                                                                                   |
